# Supplementary material for: Learning from scanners: Bias reduction and feature correction in radiomics
Source: PubMed Central journal article supplement — Clin Transl Radiat Oncol. 2019 Jul 16;19:33–8. doi: 10.1016/j.ctro.2019.07.003 (PMC6690665; doi:10.1016/j.ctro.2019.07.003), 2019-07-16

# Learning from scanners: bias reduction and feature correction in Radiomics

## SUPPLEMENTARY MATERIALS

### A. Gammex phantom plug description

In our phantom setting, we placed the plugs according to figures A1-2 and table A1. The cylindrical ROI dimensions were approximately 25 mm (height) and 10 mm (diameter).

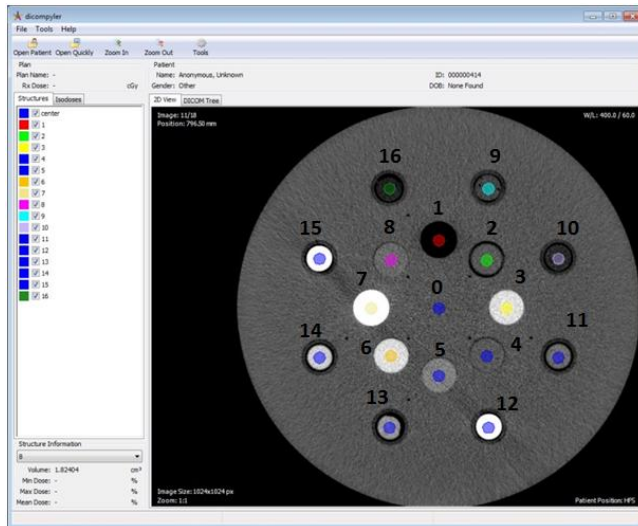

Figure A1 - Gammex phantom CT image with cylindrical delineations

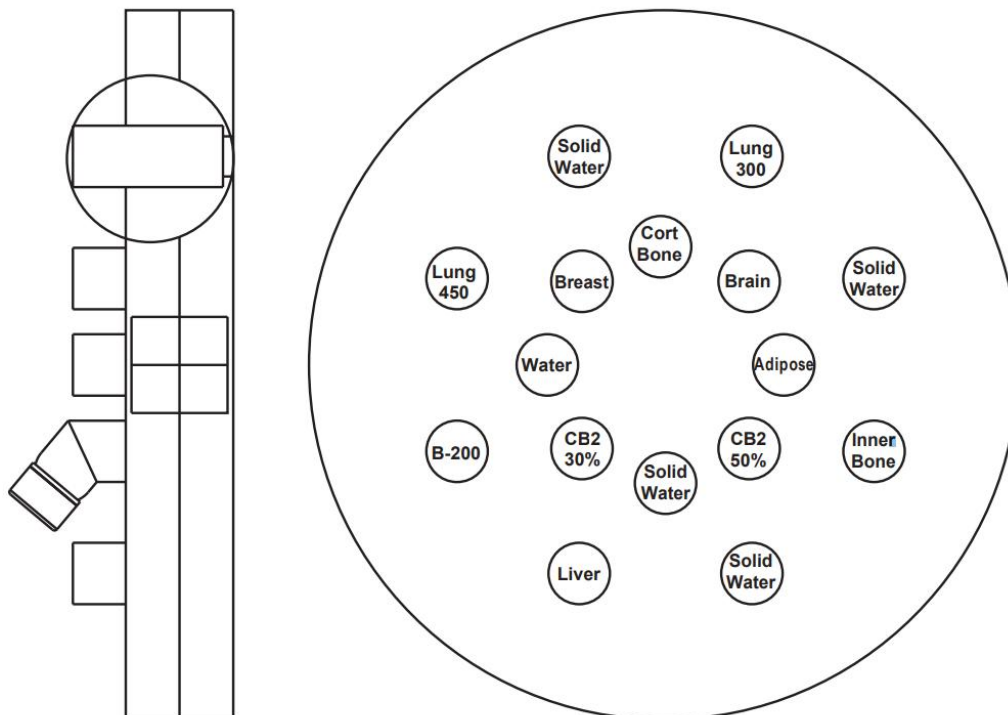

Figure A2 – original Gammex phantom plug configuration (ref. [http://cspmedical.com/content/102-1492\\_tissue\\_phantom\\_user\\_guide.pdf](http://cspmedical.com/content/102-1492_tissue_phantom_user_guide.pdf)).

Table A1 – Gammex phantom plug configuration.

| <b>Region-of-interest (ROI)</b> | <b>Plug material description</b>  |
|---------------------------------|-----------------------------------|
| 0 (center)                      | <i>Phantom – Solid water</i>      |
| 1                               | <i>SB3 Cortical Bone</i>          |
| 2                               | <i>BRN-SR2 Brain</i>              |
| 3                               | <i>AP6 Adipose</i>                |
| 4                               | <i>CB2 - 50% CaCO<sub>3</sub></i> |
| 5                               | <i>CT Solid Water</i>             |
| 6                               | <i>CB2 - 30% CaCO<sub>3</sub></i> |
| 7                               | <i>Water</i>                      |
| 8                               | <i>BR-12 Breast</i>               |
| 9                               | <i>LN-300 Lung</i>                |
| 10                              | <i>CT Solid Water</i>             |
| 11                              | <i>IB Inner Bone</i>              |
| 12                              | <i>CT Solid Water</i>             |
| 13                              | <i>LV1 Liver</i>                  |
| 14                              | <i>B200 Bone Mineral</i>          |
| 15                              | <i>LN-450 Lung</i>                |
| 16                              | <i>CT Solid Water</i>             |

*B. Clinical relevance of the phantom*

Table B1 – non-small cell lung cancer cohort description. The patient cohort is part of a research project that has been reviewed by the local ethics committee.

|                                                  |                                          | <b>221 patients</b> |
|--------------------------------------------------|------------------------------------------|---------------------|
| <b>Median age (range) at diagnosis in years</b>  |                                          | 66.0 (36-87)        |
| <b>Median GTV size (range) in cm<sup>3</sup></b> |                                          | 88 (1-860)          |
| <b>Clinical T stage</b>                          |                                          |                     |
|                                                  | <i>Less than 2</i>                       | 119 (54%)           |
|                                                  | <i>3 or greater</i>                      | 85 (38%)            |
|                                                  | <i>Unknown</i>                           | 17 (8%)             |
| <b>Clinical N stage</b>                          |                                          |                     |
|                                                  | <i>0</i>                                 | 49 (22%)            |
|                                                  | <i>1</i>                                 | 16 (7%)             |
|                                                  | <i>2 or greater</i>                      | 137 (62%)           |
|                                                  | <i>Unknown</i>                           | 19 (9%)             |
| <b>Clinical M stage</b>                          |                                          |                     |
|                                                  | <i>0</i>                                 | 200 (90%)           |
|                                                  | <i>1 or greater</i>                      | 21 (10%)            |
| <b>Histology</b>                                 |                                          |                     |
|                                                  | <i>Adenocarcinoma</i>                    | 64 (29%)            |
|                                                  | <i>Large-cell</i>                        | 22 (10%)            |
|                                                  | <i>Squamous cell carcinoma</i>           | 82 (37%)            |
|                                                  | <i>Other, or not otherwise specified</i> | 47 (21%)            |
|                                                  | <i>Unknown</i>                           | 6 (3%)              |
| <b>Outcomes</b>                                  |                                          |                     |
|                                                  | <i>Median follow-up in days</i>          | 595                 |
|                                                  | <i>Median survival time in days</i>      | 500                 |
|                                                  | <i>2-year overall survival rate</i>      | 41%                 |

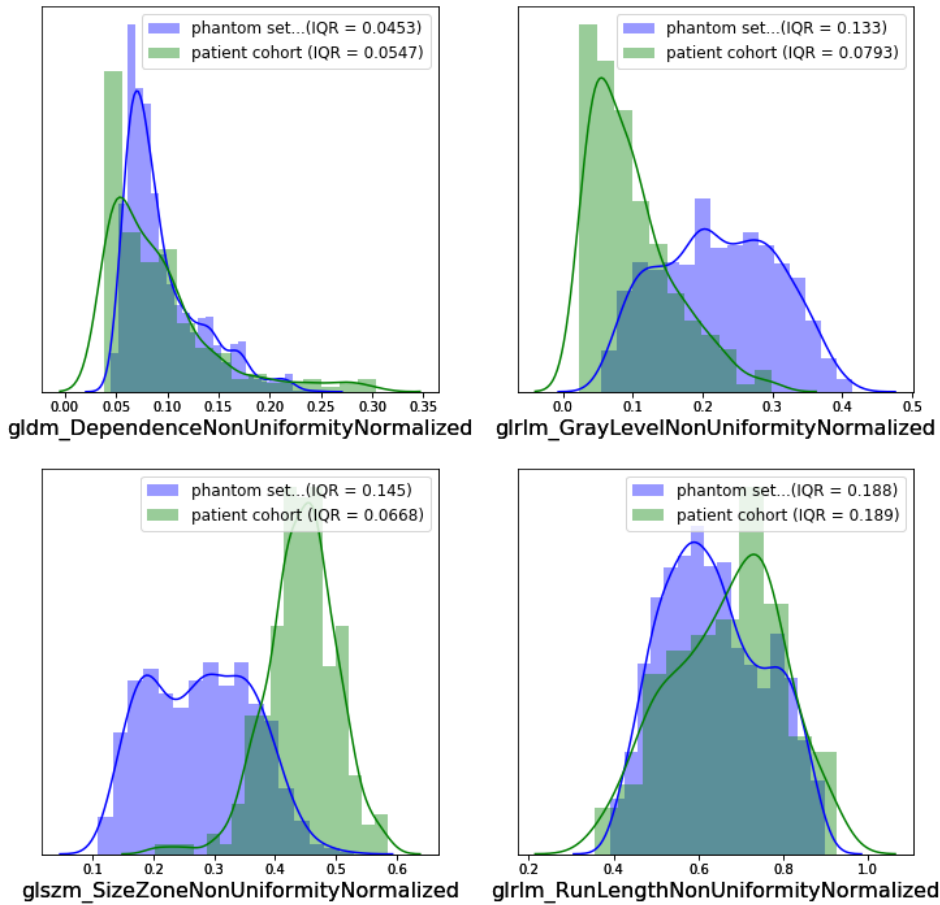

Figure B1 – distribution overlaps in 4 normalized radiomic features of the NSCLC patient cohort (green) and the phantom set (blue). The overlaps indicate that the features have similar values in both sets.

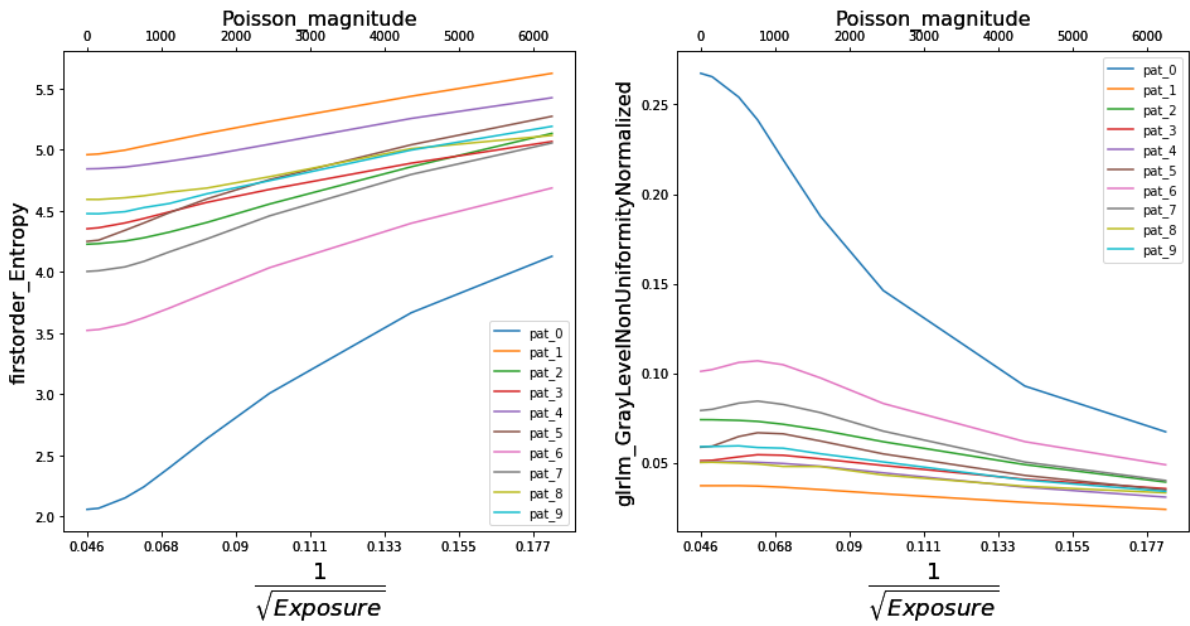

Figure B2 – scanner SNR trends in patient radiomics modeled with Poisson noise.



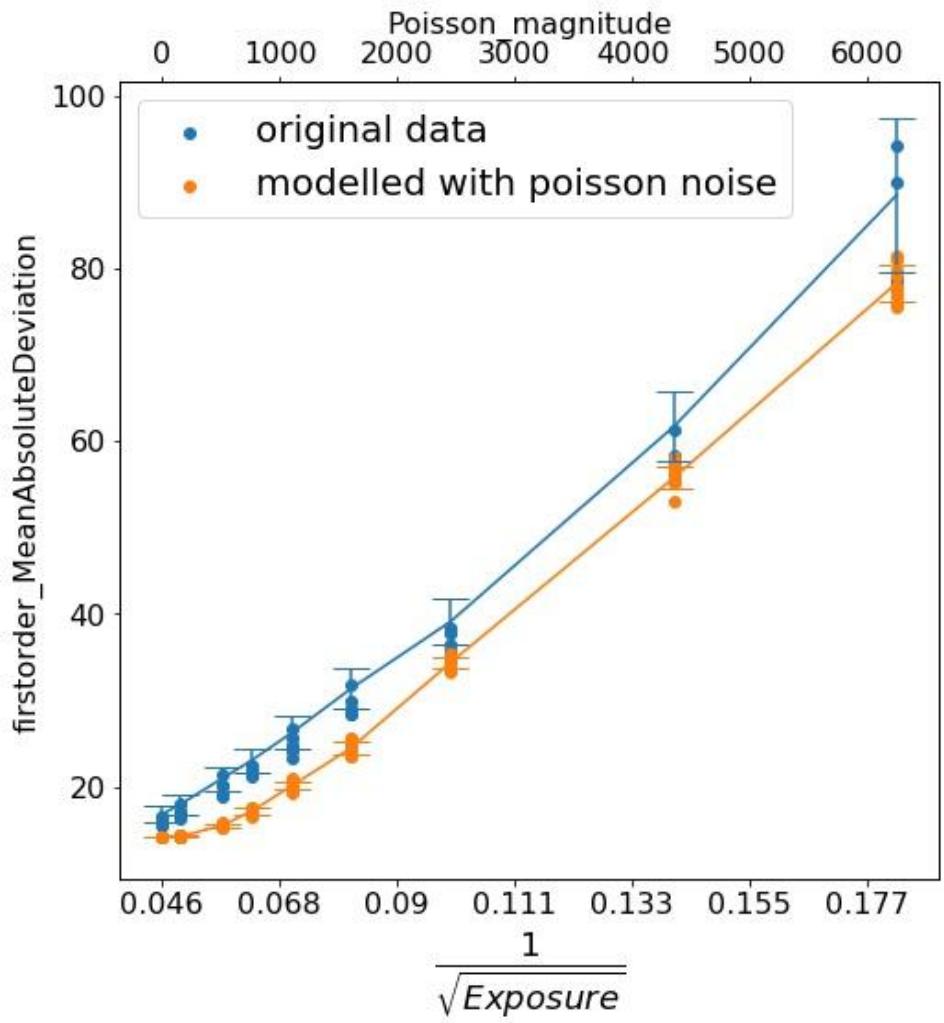

Figure B3 – Poisson noise magnitude calibration in Mean Absolute Deviation feature.

C. Correction of 92 radiomic features in the phantom set

Table C1 – Intraclass correlation coefficients (3, 9) [Koo, T. K. & Li, M. Y. A Guideline of Selecting and Reporting Intraclass Correlation Coefficients for Reliability Research. *J. Chiropr. Med.* 15, 155-163 (2016)] before and after correction, Wilcoxon test for ICC improvement (confidence intervals for means, p values), and model coefficients

| <i>features</i>                               | <i>ICC after</i> | <i>ICC before</i> | <i>ICC diff: mean CI lower</i> | <i>ICC diff: mean CI upper</i> | <i>ICC p-value Wilcoxon</i> | <i>coefficient_b</i> | <i>coefficient_w1</i> | <i>coefficient_w2</i> |
|-----------------------------------------------|------------------|-------------------|--------------------------------|--------------------------------|-----------------------------|----------------------|-----------------------|-----------------------|
| <b>firstorder_10Percentile</b>                | 0,999844         | 0,999699          | 8,17E-05                       | 9,47E-05                       | 3,9E-18                     | 29,70649             | -405,864              | -244,758              |
| <b>firstorder_90Percentile</b>                | 0,999677         | 0,999501          | 9,86E-05                       | 0,000112                       | 3,9E-18                     | -27,6153             | 332,4447              | 825,2289              |
| <b>firstorder_Entropy</b>                     | 0,854644         | 0,674753          | 0,106402                       | 0,117316                       | 3,9E-18                     | -1,47697             | 24,16202              | -47,7042              |
| <b>firstorder_InterquartileRange</b>          | 0,692529         | 0,544985          | 0,08554                        | 0,092001                       | 3,9E-18                     | -30,9715             | 398,9943              | 547,162               |
| <b>firstorder_Maximum</b>                     | 0,997766         | 0,996747          | 0,000574                       | 0,00066                        | 3,9E-18                     | -73,9718             | 944,7416              | 1372,011              |
| <b>firstorder_MeanAbsoluteDeviation</b>       | 0,695204         | 0,551633          | 0,083149                       | 0,089616                       | 3,9E-18                     | -17,815              | 228,9374              | 341,4874              |
| <b>firstorder_Minimum</b>                     | 0,998221         | 0,997263          | 0,000543                       | 0,000633                       | 3,9E-18                     | 65,53846             | -812,668              | -1630,77              |
| <b>firstorder_Range</b>                       | 0,722629         | 0,623184          | 0,058771                       | 0,06732                        | 3,9E-18                     | -139,51              | 1757,41               | 3002,785              |
| <b>firstorder_RobustMeanAbsoluteDeviation</b> | 0,698178         | 0,550611          | 0,085516                       | 0,09187                        | 3,9E-18                     | -12,7414             | 164,2535              | 225,3668              |
| <b>firstorder_RootMeanSquared</b>             | 0,999605         | 0,999545          | 3,22E-05                       | 3,76E-05                       | 3,9E-18                     | -9,23436             | 85,09279              | 686,8815              |
| <b>firstorder_Uniformity</b>                  | 0,789711         | 0,653375          | 0,078433                       | 0,08711                        | 3,9E-18                     | 0,317926             | -5,52798              | 16,0613               |
| <b>firstorder_Variance</b>                    | 0,371557         | 0,319388          | 0,028624                       | 0,030829                       | 3,9E-18                     | -309,633             | -9838,47              | 198898,1              |
| <b>glcm_Autocorrelation</b>                   | 0,348418         | 0,306331          | 0,023179                       | 0,026265                       | 3,9E-18                     | -7,32594             | -183,57               | 3856,381              |
| <b>glcm_ClusterTendency</b>                   | 0,373413         | 0,323849          | 0,027156                       | 0,029525                       | 3,9E-18                     | -1,04486             | -35,7266              | 706,935               |
| <b>glcm_Contrast</b>                          | 0,300635         | 0,255236          | 0,025008                       | 0,027062                       | 3,9E-18                     | -0,91301             | -27,7863              | 570,133               |
| <b>glcm_DifferenceAverage</b>                 | 0,607661         | 0,460836          | 0,08631                        | 0,09311                        | 3,9E-18                     | -0,9883              | 12,8707               | 16,65014              |
| <b>glcm_DifferenceEntropy</b>                 | 0,809049         | 0,591225          | 0,132266                       | 0,144258                       | 3,9E-18                     | -1,18202             | 19,06615              | -32,982               |
| <b>glcm_DifferenceVariance</b>                | 0,297207         | 0,253535          | 0,024                          | 0,026029                       | 3,9E-18                     | -0,32828             | -9,96815              | 205,6752              |
| <b>glcm_Id</b>                                | 0,859951         | 0,627464          | 0,140949                       | 0,15257                        | 3,9E-18                     | 0,284062             | -4,75576              | 11,0194               |
| <b>glcm_Idm</b>                               | 0,858021         | 0,623568          | 0,142321                       | 0,154137                       | 3,9E-18                     | 0,358518             | -6,04847              | 14,3542               |
| <b>glcm_Imc2</b>                              | 0,787599         | 0,728256          | 0,033999                       | 0,039624                       | 3,9E-18                     | -0,09696             | 1,197467              | 3,078423              |

|                                                  |          |          |          |          |         |          |          |          |
|--------------------------------------------------|----------|----------|----------|----------|---------|----------|----------|----------|
| <b>glcm_InverseVariance</b>                      | 0,441952 | 0,313603 | 0,076007 | 0,080382 | 3,9E-18 | 0,066535 | -0,83746 | -3,74005 |
| <b>glcm_JointAverage</b>                         | 0,587032 | 0,496116 | 0,05092  | 0,055766 | 3,9E-18 | -2,50106 | 28,5788  | 87,0922  |
| <b>glcm_JointEnergy</b>                          | 0,660044 | 0,566185 | 0,052499 | 0,058119 | 3,9E-18 | 0,204299 | -3,62147 | 11,98942 |
| <b>glcm_JointEntropy</b>                         | 0,850102 | 0,651211 | 0,11888  | 0,130284 | 3,9E-18 | -2,99871 | 49,5002  | -103,29  |
| <b>glcm_MaximumProbability</b>                   | 0,642679 | 0,55002  | 0,051413 | 0,055853 | 3,9E-18 | 0,325595 | -5,74753 | 18,61485 |
| <b>glcm_SumAverage</b>                           | 0,587032 | 0,496116 | 0,05092  | 0,055766 | 3,9E-18 | -5,00211 | 57,15759 | 174,1844 |
| <b>glcm_SumEntropy</b>                           | 0,844942 | 0,679239 | 0,097603 | 0,108145 | 3,9E-18 | -1,4661  | 24,00416 | -47,6823 |
| <b>glcm_SumSquares</b>                           | 0,345357 | 0,296066 | 0,027072 | 0,029242 | 3,9E-18 | -0,48947 | -15,8782 | 319,267  |
| <b>gldm_DependenceEntropy</b>                    | 0,815698 | 0,737105 | 0,044717 | 0,05115  | 3,9E-18 | -0,43532 | 7,002626 | -11,115  |
| <b>gldm_DependenceNonUniformity</b>              | 0,676754 | 0,484426 | 0,115741 | 0,122984 | 3,9E-18 | -57,2455 | 821,3003 | -195,792 |
| <b>gldm_DependenceNonUniformityNormalized</b>    | 0,683399 | 0,497977 | 0,110913 | 0,118248 | 3,9E-18 | -0,05944 | 0,85266  | -0,1997  |
| <b>gldm_DependenceVariance</b>                   | 0,588871 | 0,485252 | 0,058507 | 0,062532 | 3,9E-18 | 23,43175 | -410,767 | 1310,482 |
| <b>gldm_GrayLevelNonUniformity</b>               | 0,790402 | 0,655181 | 0,077639 | 0,086367 | 3,9E-18 | 306,2306 | -5324,45 | 15470,06 |
| <b>gldm_GrayLevelVariance</b>                    | 0,371196 | 0,319111 | 0,028564 | 0,030759 | 3,9E-18 | -0,49084 | -15,8034 | 318,2753 |
| <b>gldm_HighGrayLevelEmphasis</b>                | 0,327537 | 0,287177 | 0,022445 | 0,025689 | 3,9E-18 | -7,59965 | -200,289 | 4148,6   |
| <b>gldm_LargeDependenceEmphasis</b>              | 0,686542 | 0,563838 | 0,069795 | 0,076008 | 3,9E-18 | 142,4245 | -2514,95 | 8185,056 |
| <b>gldm_SmallDependenceEmphasis</b>              | 0,587672 | 0,438376 | 0,088079 | 0,094471 | 3,9E-18 | -0,087   | 1,129034 | 1,911433 |
| <b>gldm_SmallDependenceHighGrayLevelEmphasis</b> | 0,152496 | 0,139393 | 0,007177 | 0,008272 | 3,9E-18 | 6,154864 | -245,679 | 2138,504 |
| <b>glrlm_GrayLevelNonUniformity</b>              | 0,840947 | 0,687796 | 0,088798 | 0,098263 | 3,9E-18 | 104,2441 | -1749,14 | 3698,811 |
| <b>glrlm_GrayLevelNonUniformityNormalized</b>    | 0,802525 | 0,661768 | 0,081365 | 0,090254 | 3,9E-18 | 0,257051 | -4,45352 | 12,46507 |
| <b>glrlm_GrayLevelVariance</b>                   | 0,376537 | 0,323803 | 0,028942 | 0,031206 | 3,9E-18 | -0,55013 | -15,1432 | 321,7815 |
| <b>glrlm_HighGrayLevelRunEmphasis</b>            | 0,325602 | 0,285371 | 0,022392 | 0,025633 | 3,9E-18 | -7,71224 | -198,905 | 4150,346 |
| <b>glrlm_LongRunEmphasis</b>                     | 0,659344 | 0,552097 | 0,060334 | 0,065515 | 3,9E-18 | 2,694085 | -47,4957 | 156,5878 |
| <b>glrlm_RunEntropy</b>                          | 0,773732 | 0,641547 | 0,076627 | 0,084903 | 3,9E-18 | -0,40046 | 5,552661 | 5,231874 |
| <b>glrlm_RunLengthNonUniformity</b>              | 0,853815 | 0,622957 | 0,140026 | 0,151096 | 3,9E-18 | -406,202 | 6952,154 | -18055,6 |
| <b>glrlm_RunLengthNonUniformityNormalized</b>    | 0,844001 | 0,627976 | 0,129743 | 0,140487 | 3,9E-18 | -0,34602 | 5,964525 | -16,2278 |
| <b>glrlm_RunPercentage</b>                       | 0,806257 | 0,621098 | 0,109228 | 0,118549 | 3,9E-18 | -0,28862 | 5,022242 | -14,7172 |
| <b>glrlm_RunVariance</b>                         | 0,618345 | 0,524874 | 0,052084 | 0,056562 | 3,9E-18 | 1,116717 | -19,7025 | 65,76918 |
| <b>glrlm_ShortRunEmphasis</b>                    | 0,803858 | 0,620116 | 0,108546 | 0,117764 | 3,9E-18 | -0,23023 | 4,016781 | -11,8638 |

|                                             |          |          |          |          |         |          |          |          |
|---------------------------------------------|----------|----------|----------|----------|---------|----------|----------|----------|
| <b>glrlm_ShortRunHighGrayLevelEmphasis</b>  | 0,314571 | 0,275162 | 0,021979 | 0,025172 | 3,9E-18 | -6,88037 | -202,386 | 4045,983 |
| <b>glszm_GrayLevelVariance</b>              | 0,572269 | 0,480798 | 0,051894 | 0,056856 | 3,9E-18 | -4,54273 | 51,5895  | 189,301  |
| <b>glszm_HighGrayLevelZoneEmphasis</b>      | 0,320077 | 0,278692 | 0,023263 | 0,026767 | 3,9E-18 | -11,9471 | -128,679 | 4006,484 |
| <b>glszm_LargeAreaEmphasis</b>              | 0,532918 | 0,476769 | 0,03029  | 0,032921 | 3,9E-18 | 13983,81 | -249735  | 852646   |
| <b>glszm_SizeZoneNonUniformity</b>          | 0,428712 | 0,334942 | 0,053718 | 0,057667 | 3,9E-18 | -21,4558 | 159,1109 | 2250,808 |
| <b>glszm_SmallAreaHighGrayLevelEmphasis</b> | 0,293086 | 0,256132 | 0,020763 | 0,024012 | 3,9E-18 | -6,82579 | -107,496 | 2783,871 |
| <b>glszm_ZoneEntropy</b>                    | 0,70759  | 0,600089 | 0,062252 | 0,069978 | 3,9E-18 | -1,61697 | 26,33048 | -54,4518 |
| <b>glszm_ZonePercentage</b>                 | 0,451811 | 0,351268 | 0,058092 | 0,062276 | 3,9E-18 | -0,06269 | 0,549782 | 5,201372 |
| <b>glszm_ZoneVariance</b>                   | 0,54634  | 0,486838 | 0,032182 | 0,035071 | 3,9E-18 | 12881,71 | -229975  | 783402,1 |
| <b>ngtdm_Complexity</b>                     | 0,194553 | 0,176047 | 0,009861 | 0,010892 | 3,9E-18 | 51,54616 | -2204,37 | 19907,99 |
| <b>ngtdm_Contrast</b>                       | 0,568331 | 0,472776 | 0,053794 | 0,057241 | 3,9E-18 | -0,02811 | 0,337579 | 1,055767 |
| <b>ngtdm_Strength</b>                       | 0,666044 | 0,621759 | 0,024698 | 0,028429 | 3,9E-18 | -0,05731 | -0,97016 | 24,3617  |

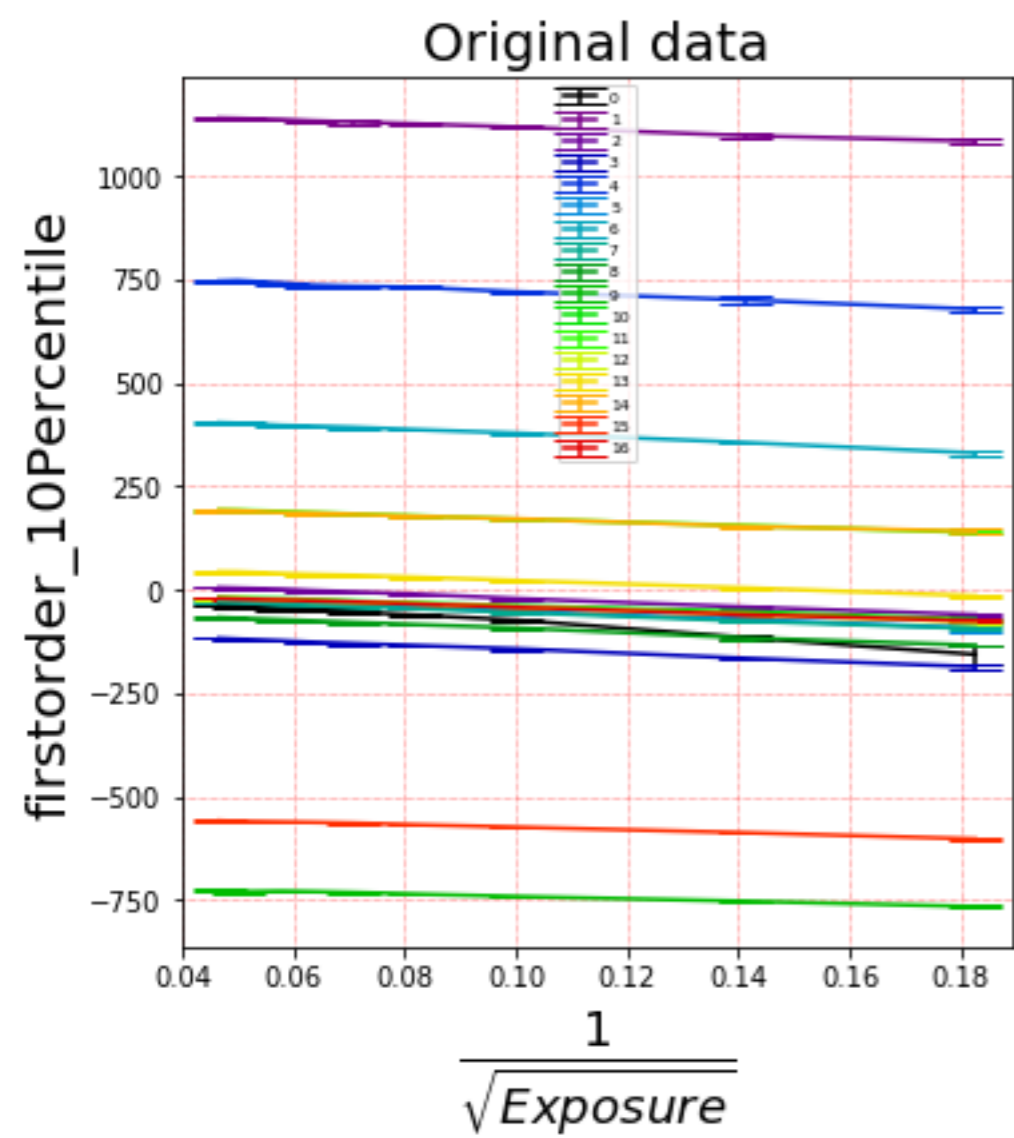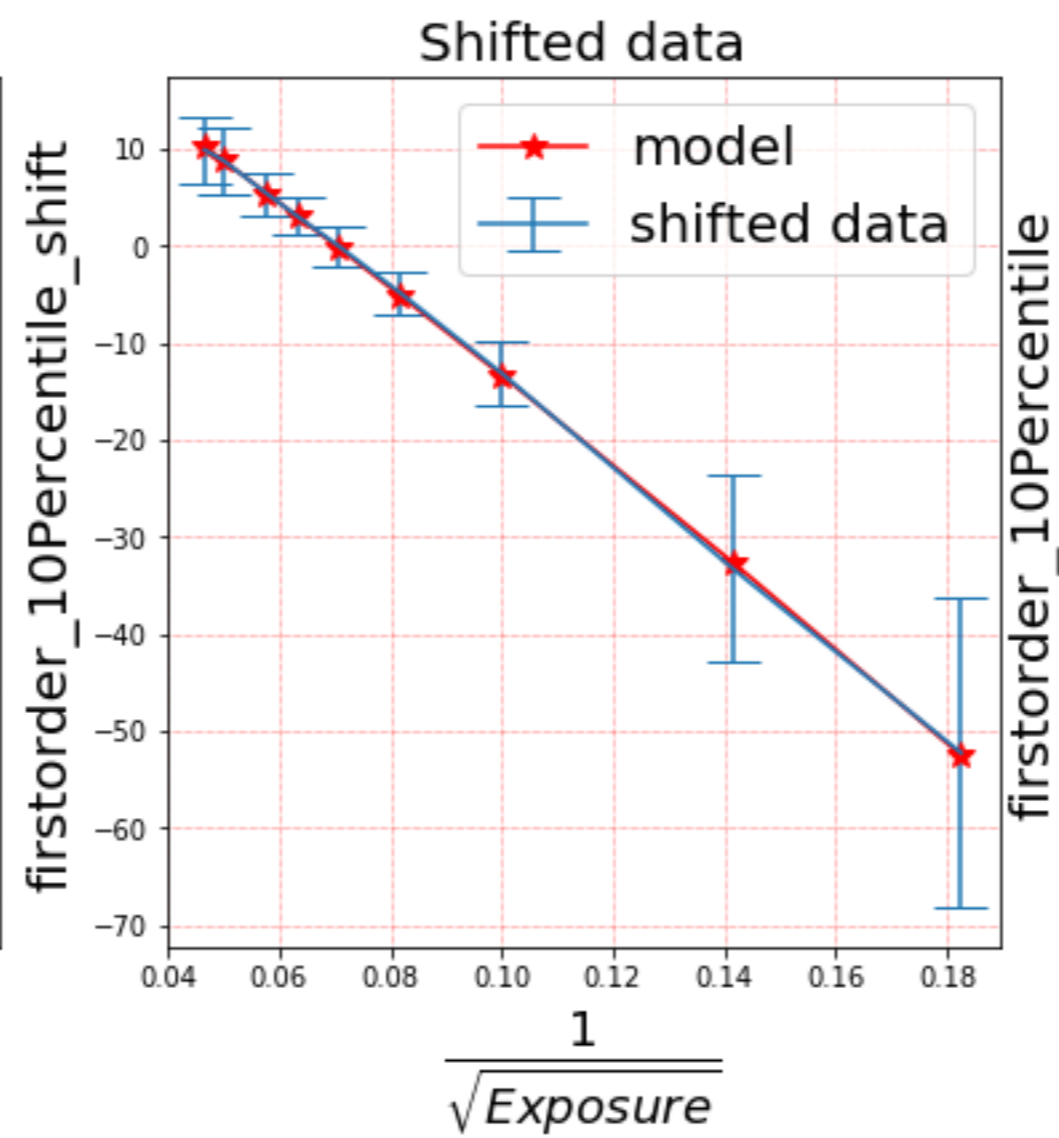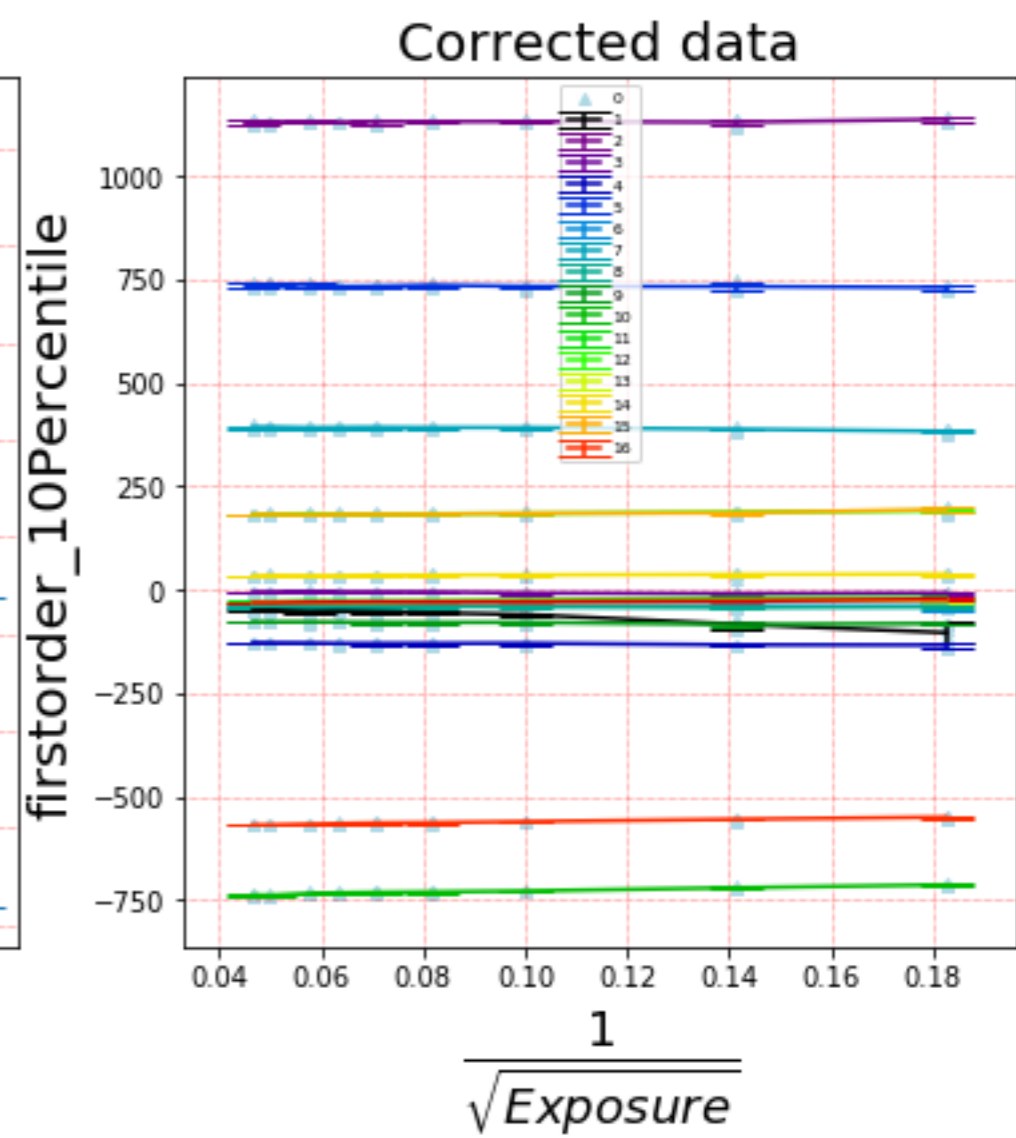

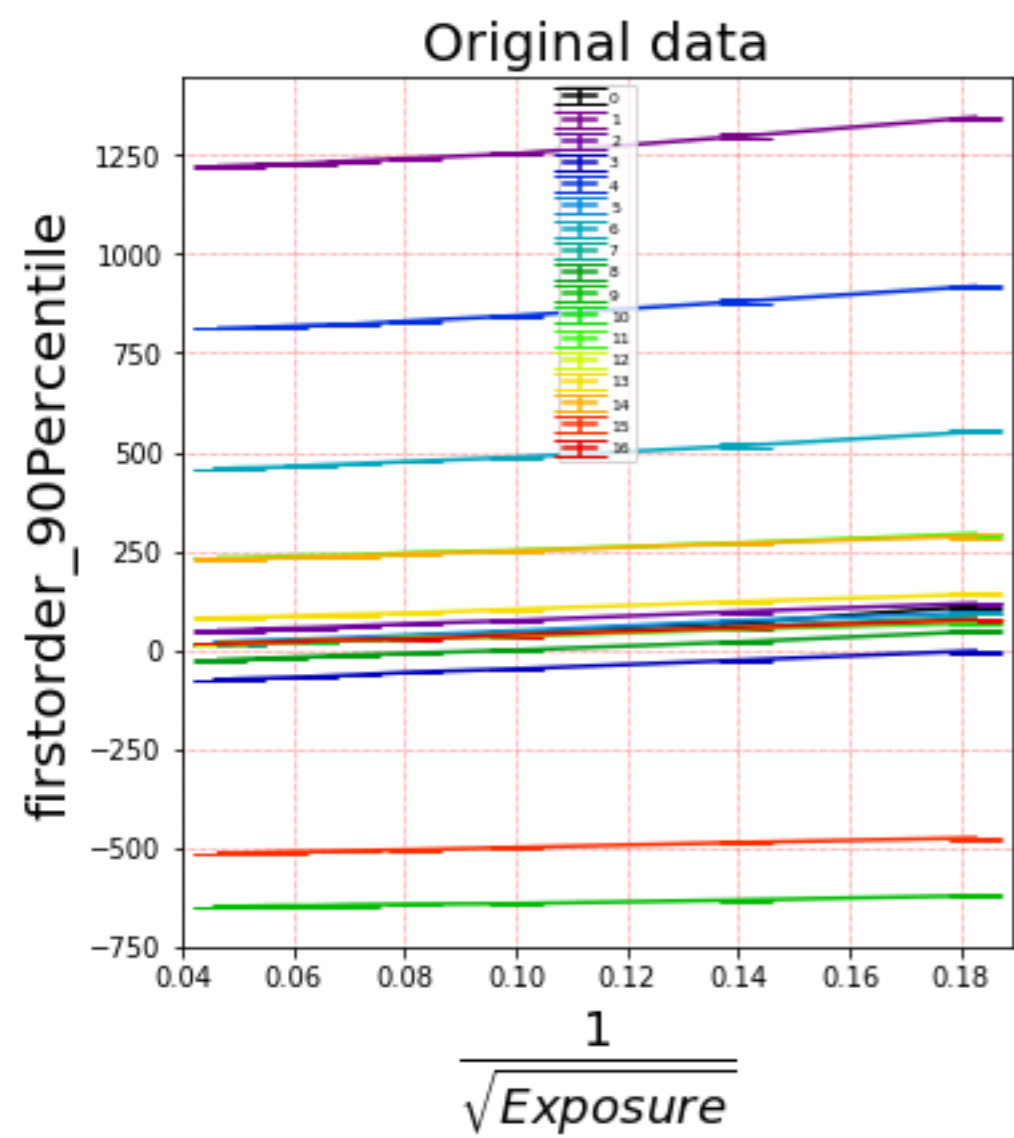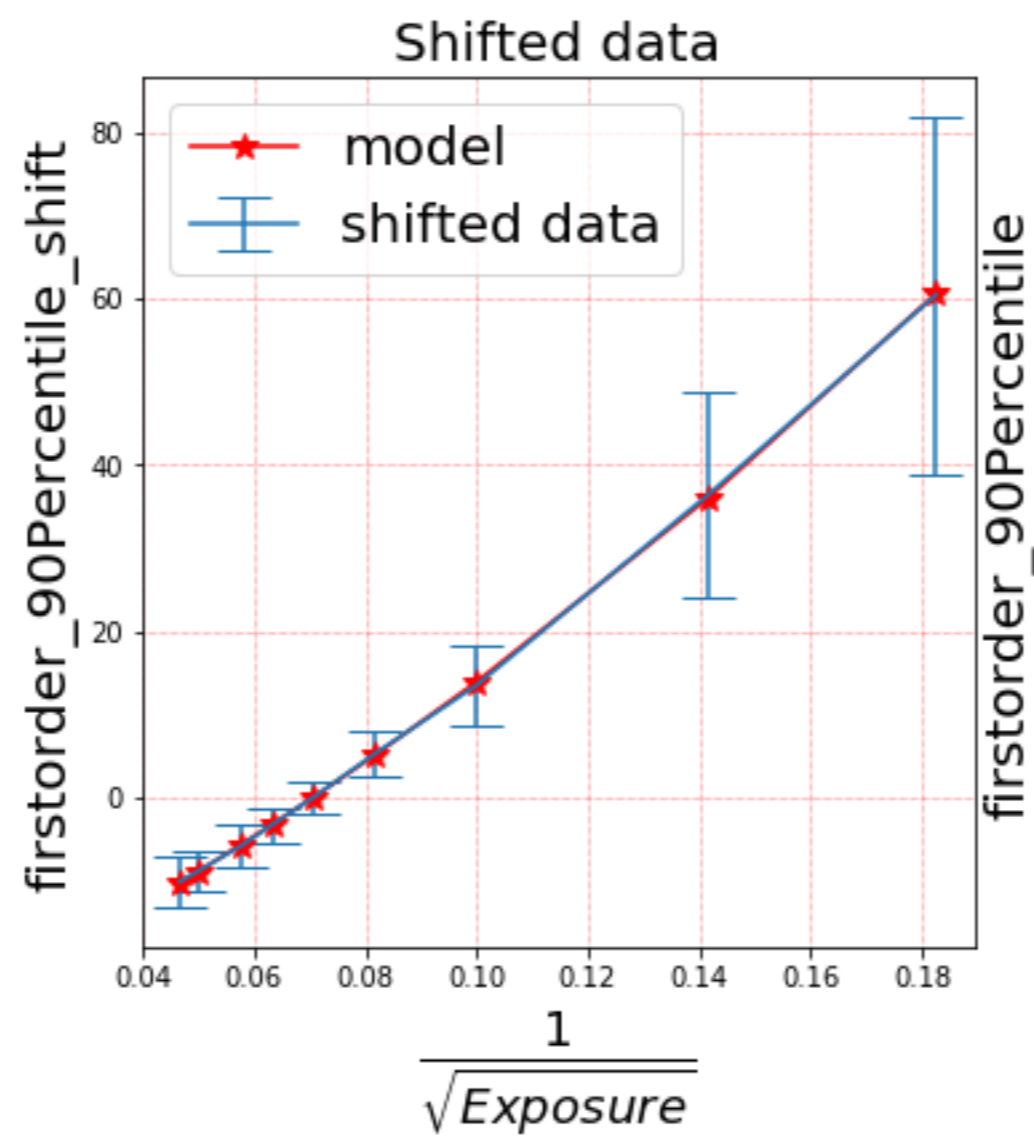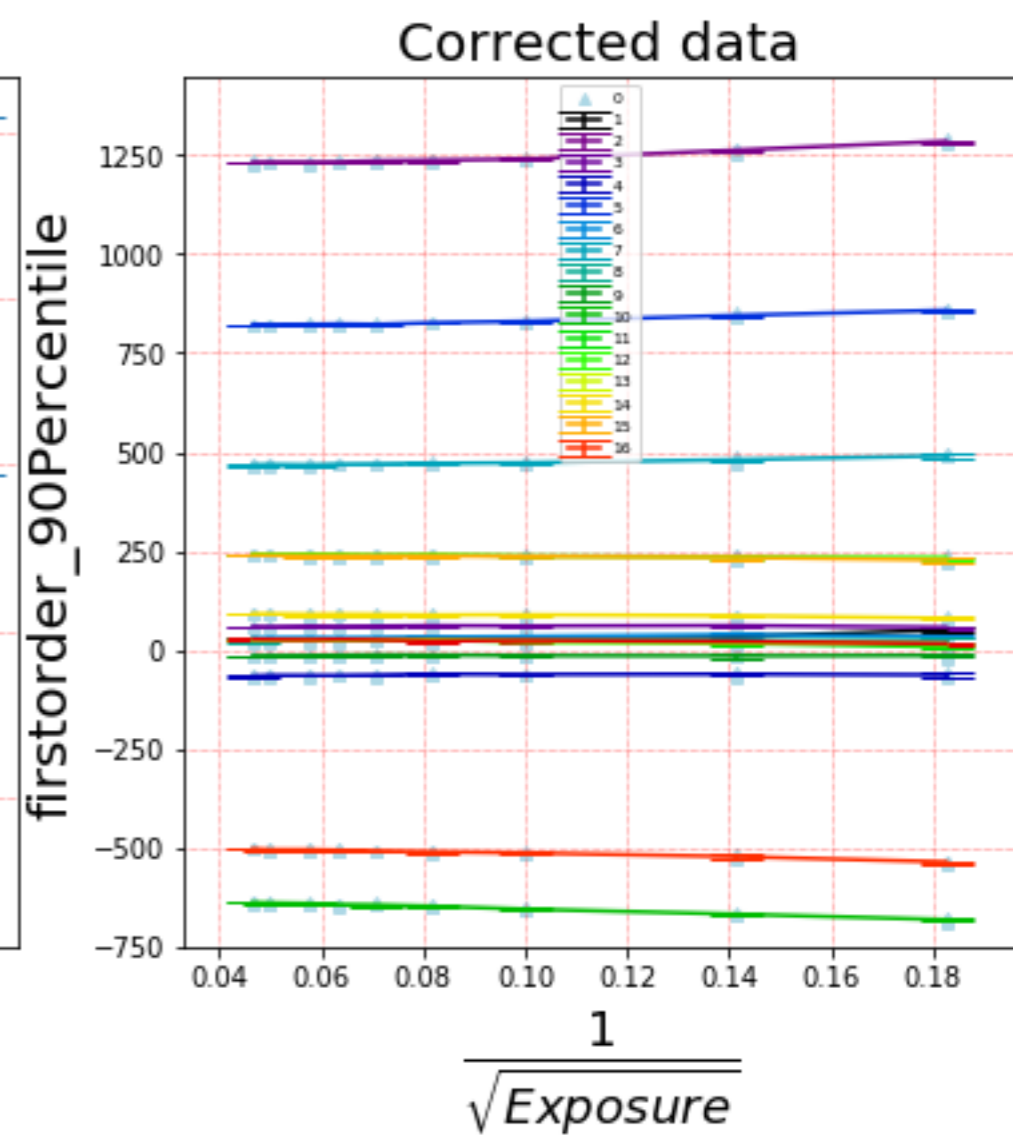

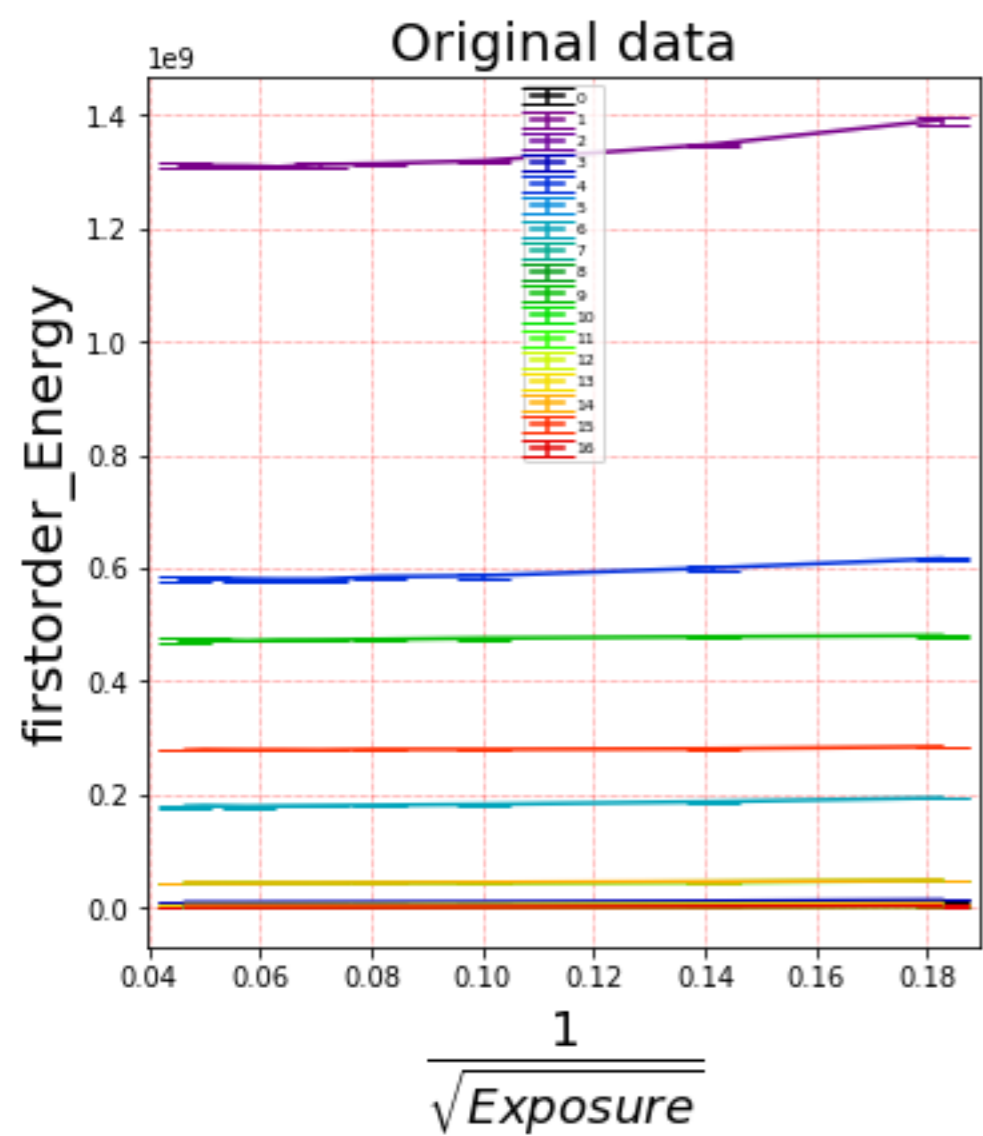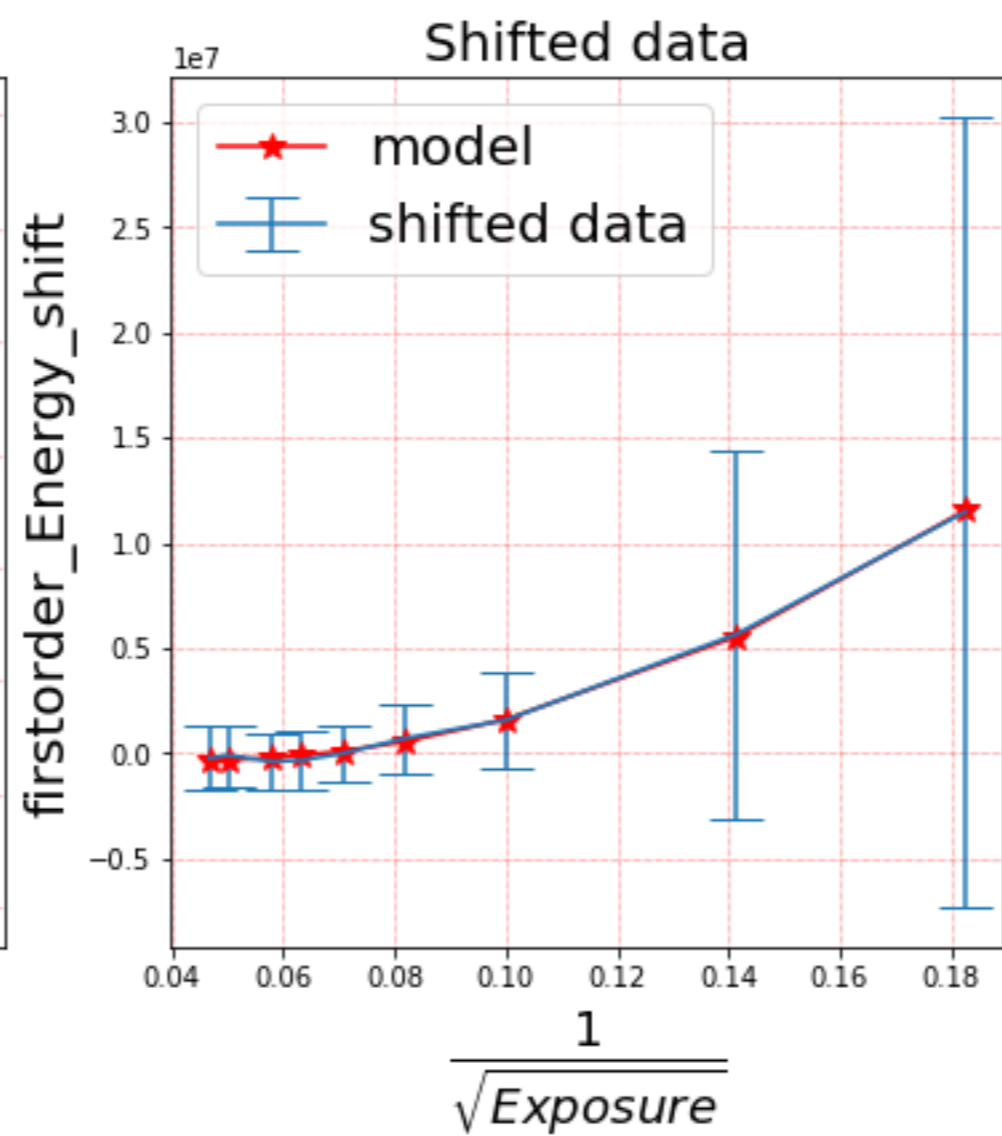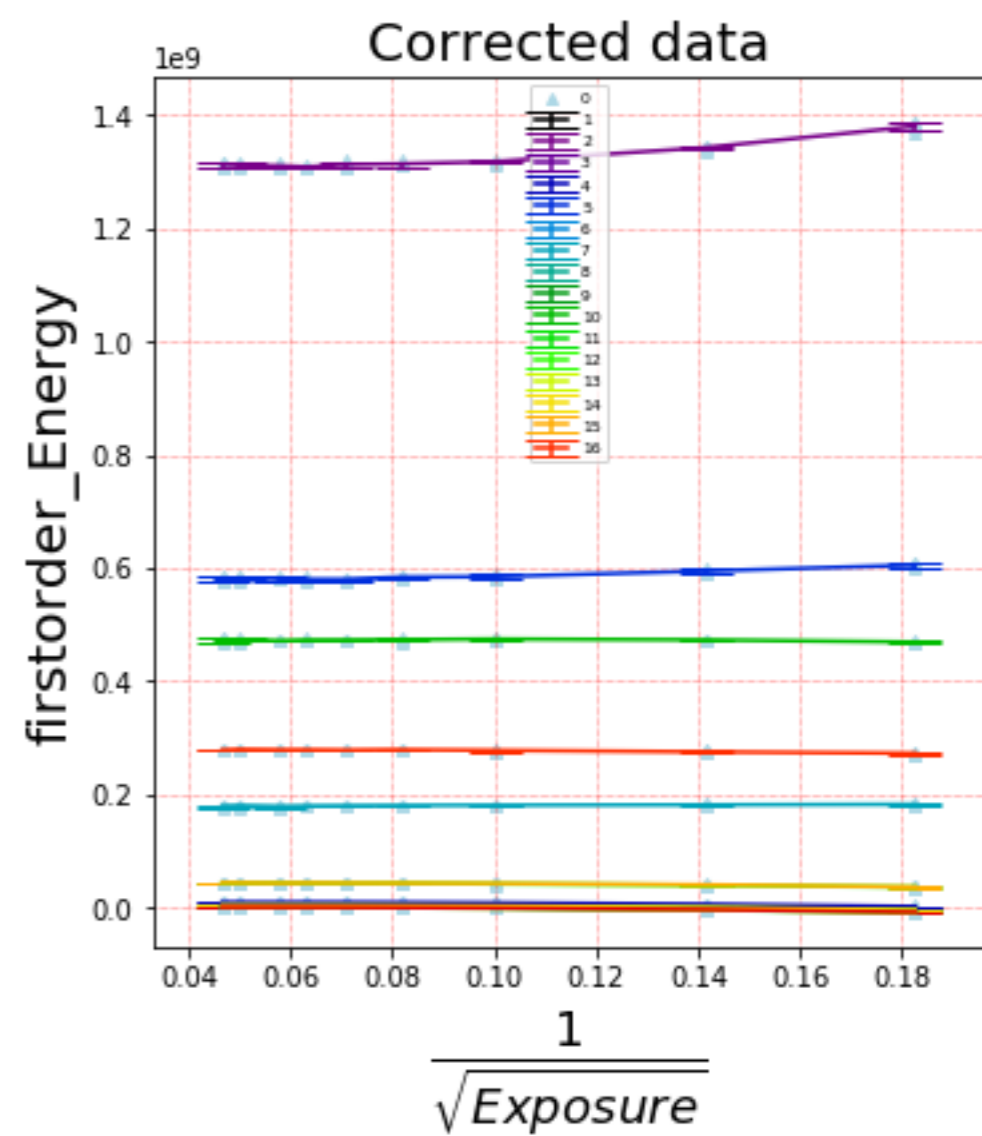

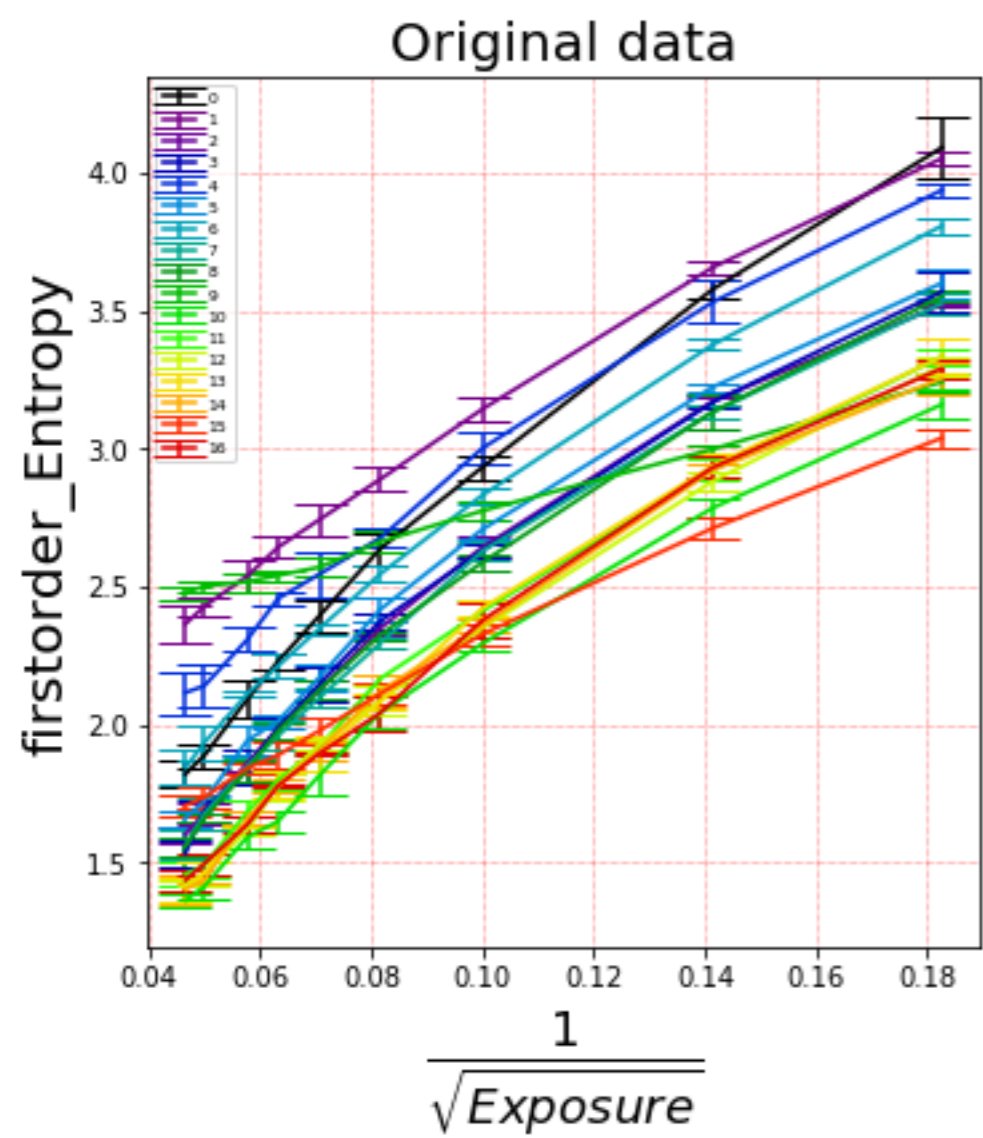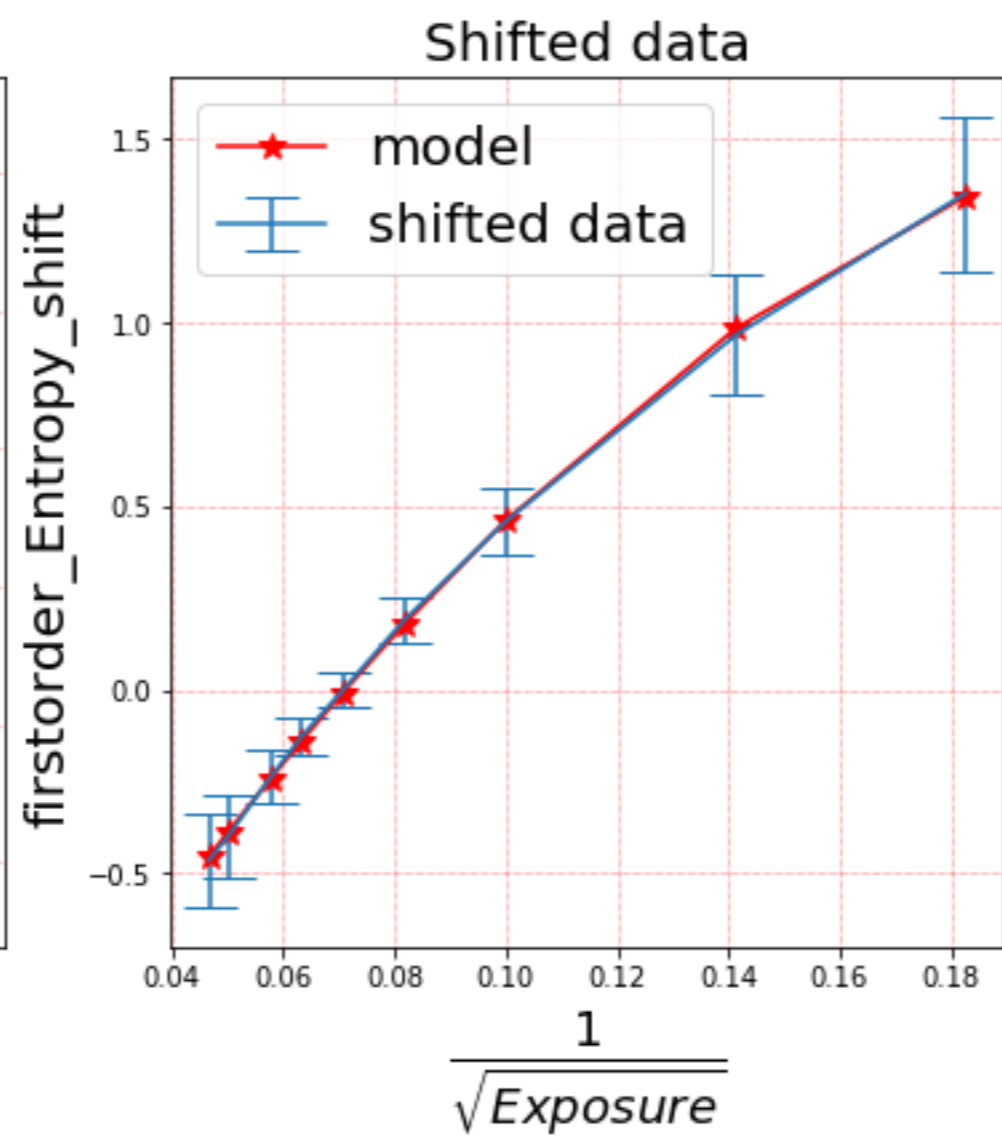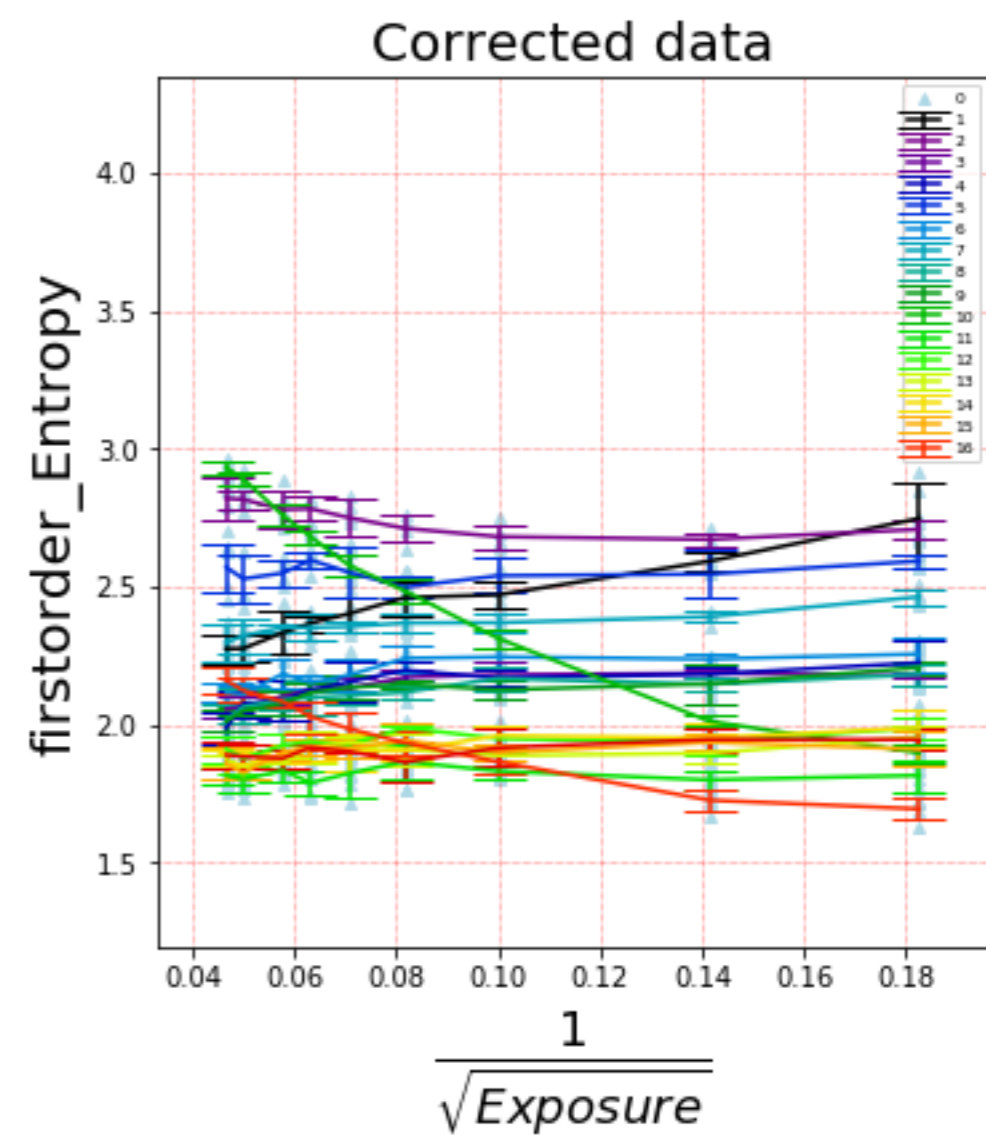



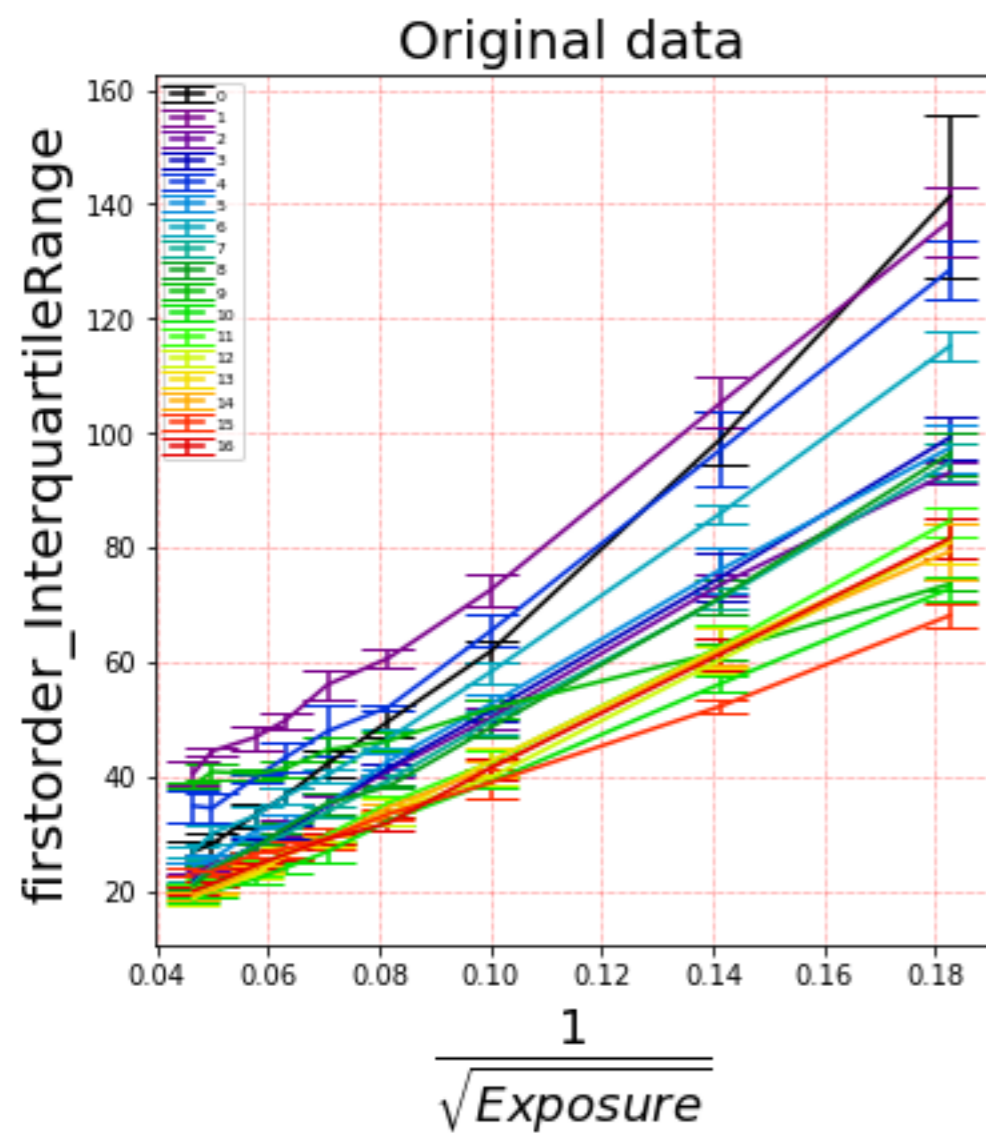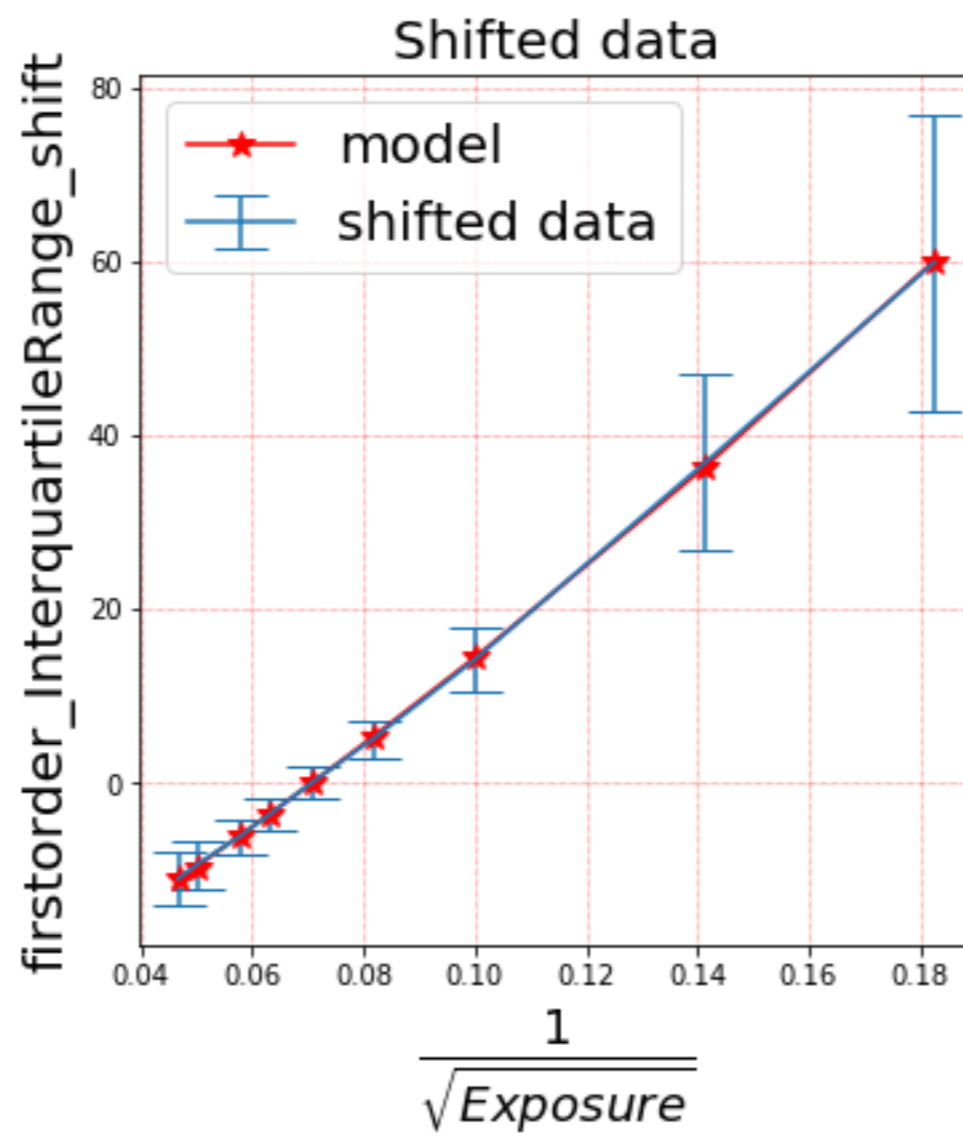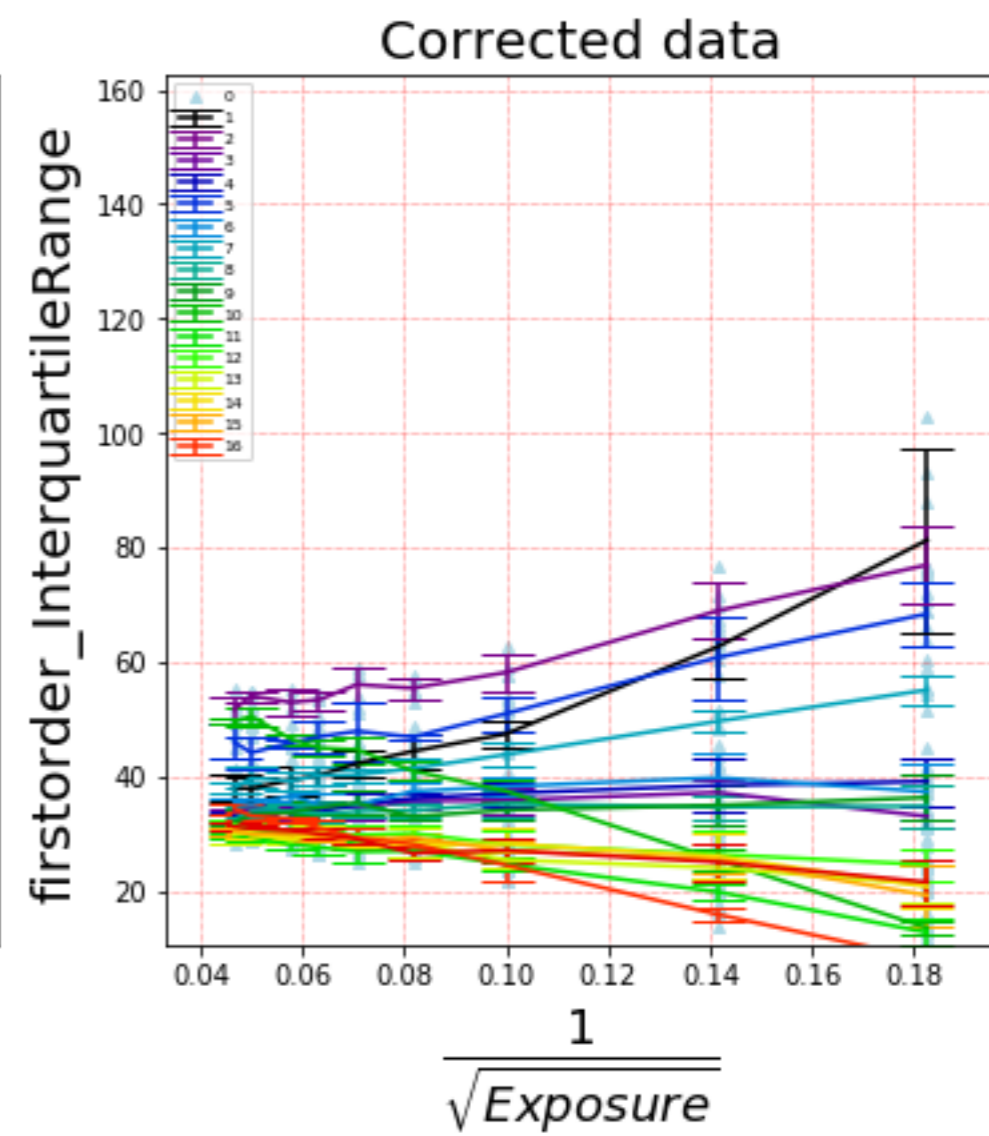

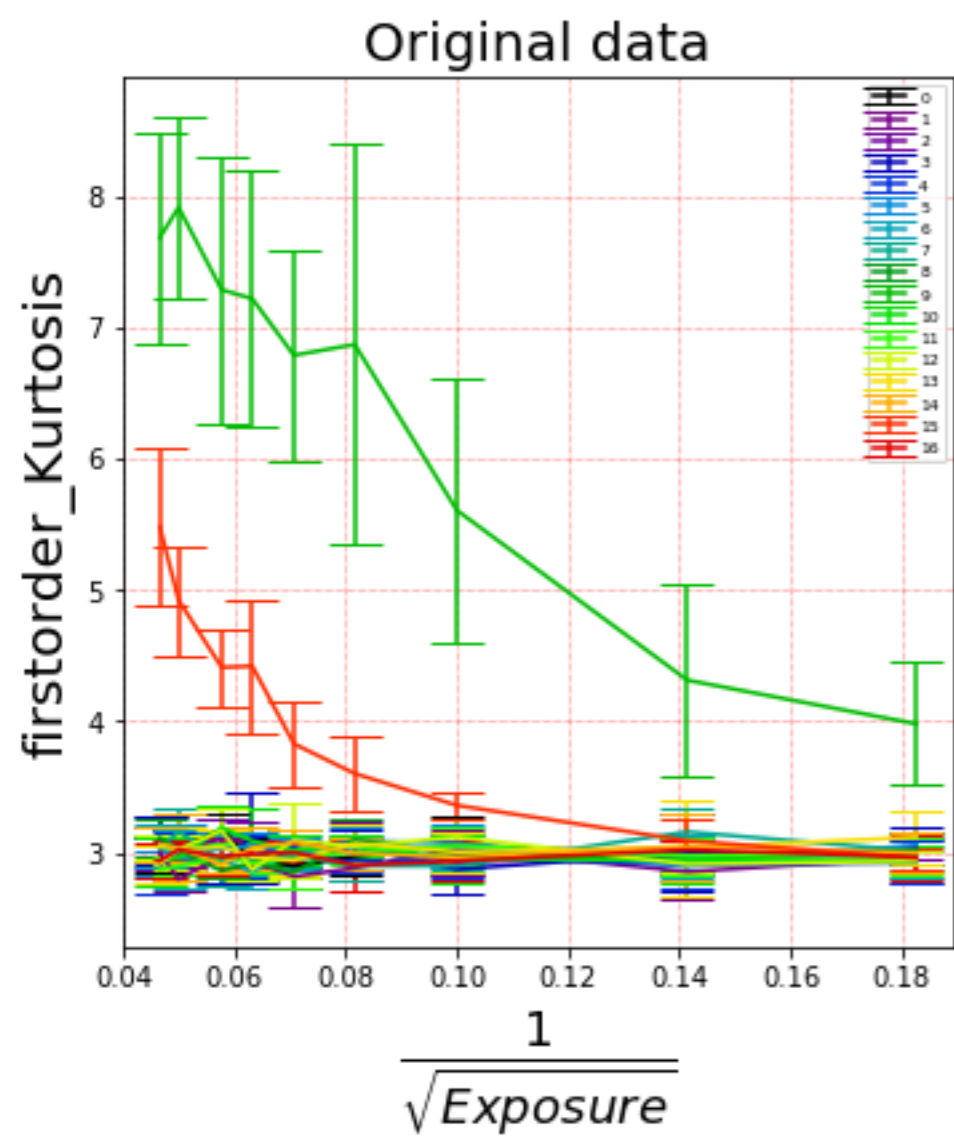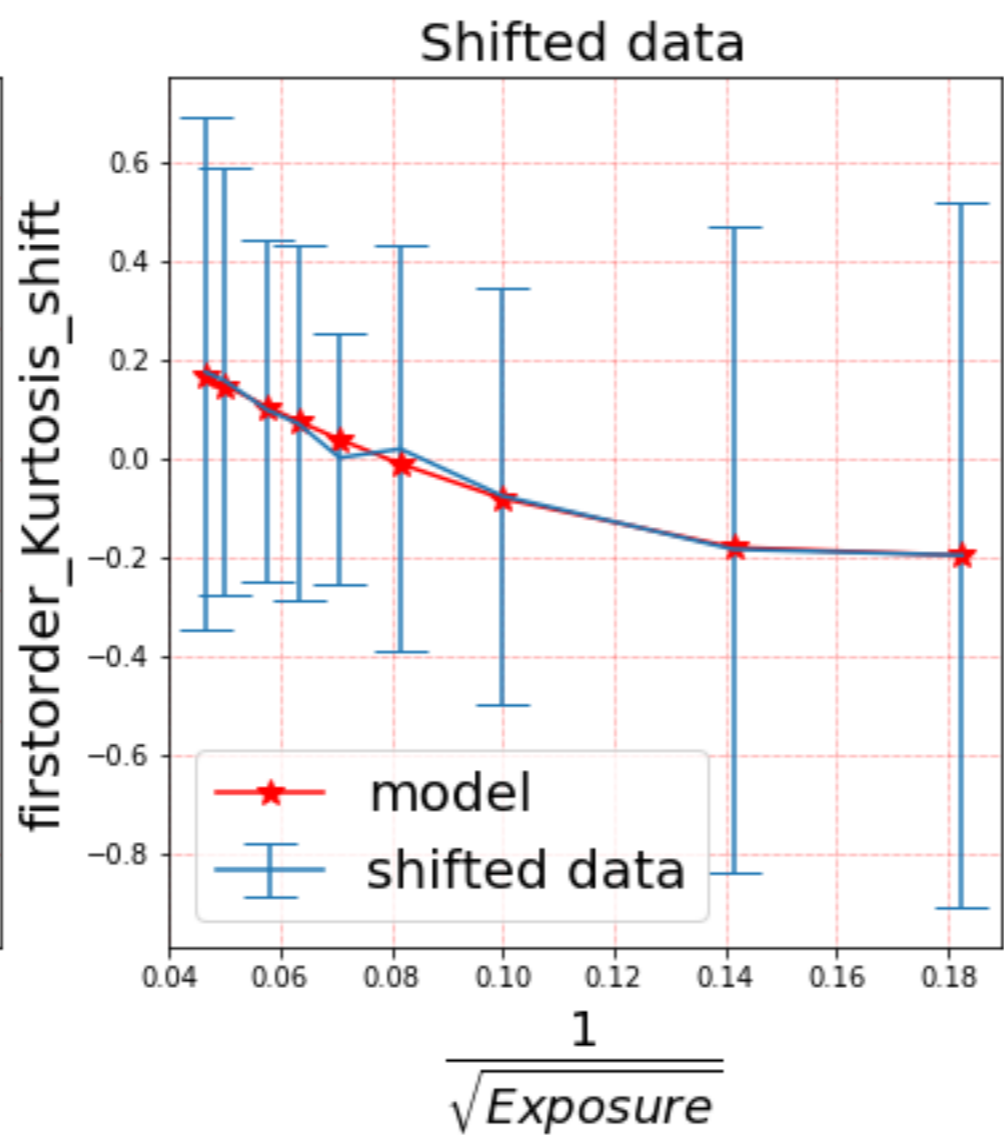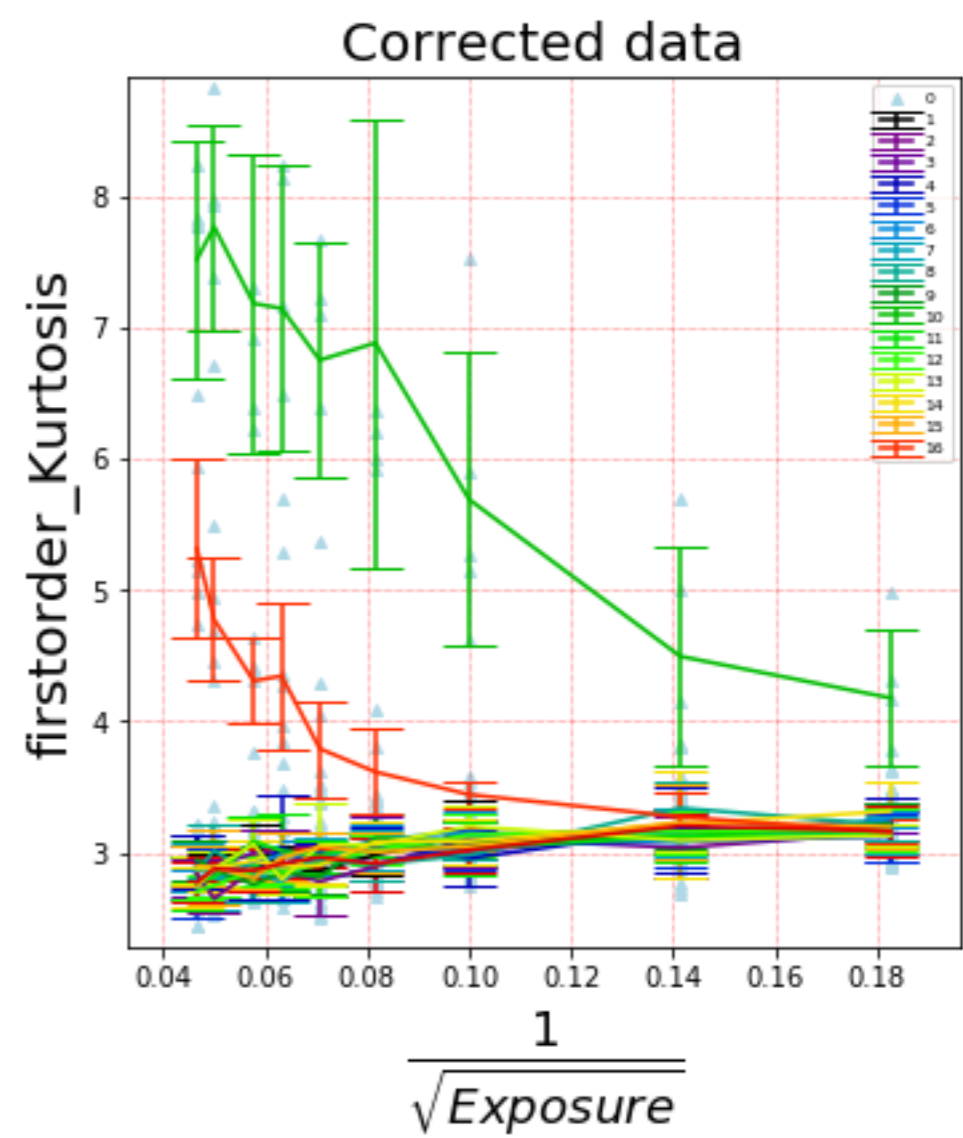

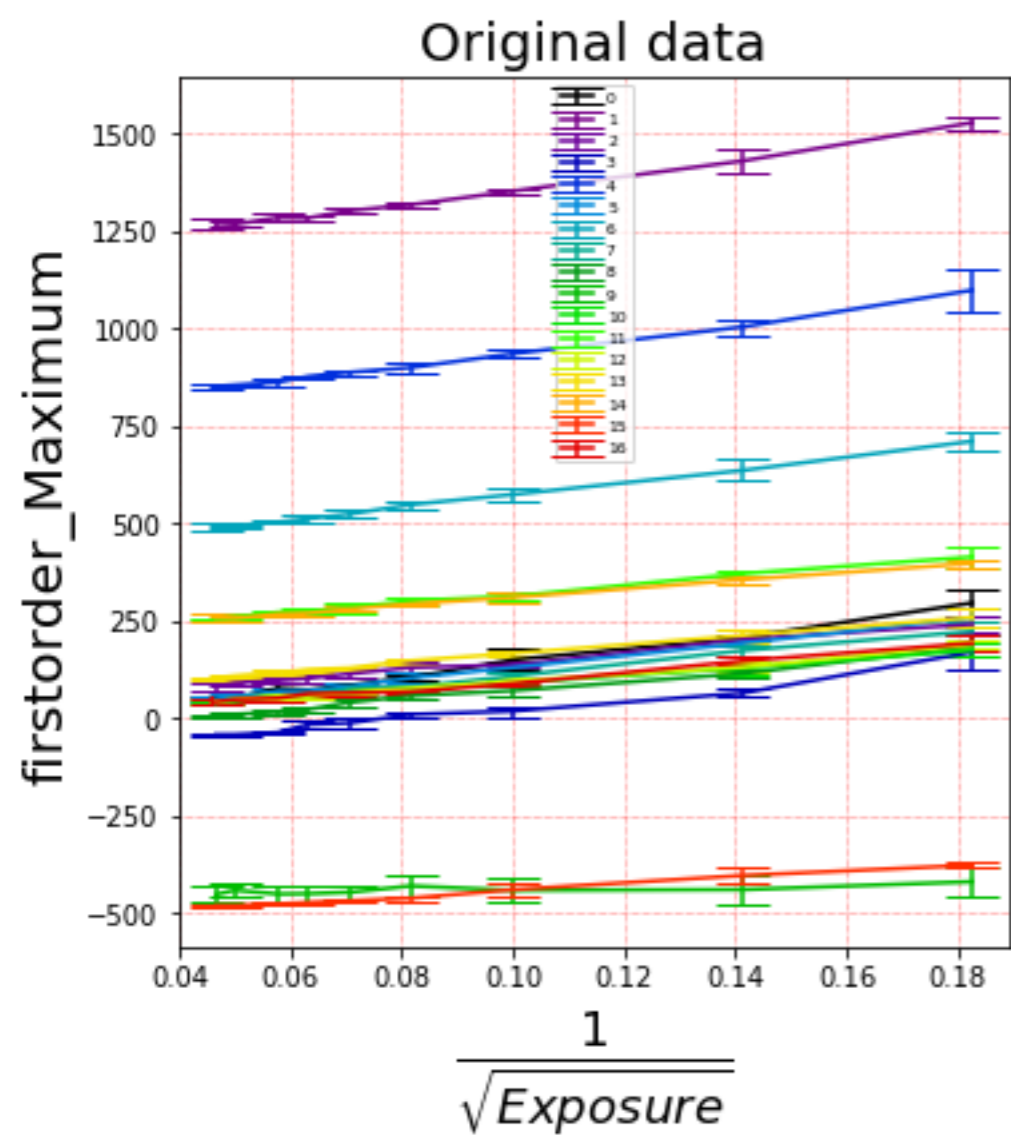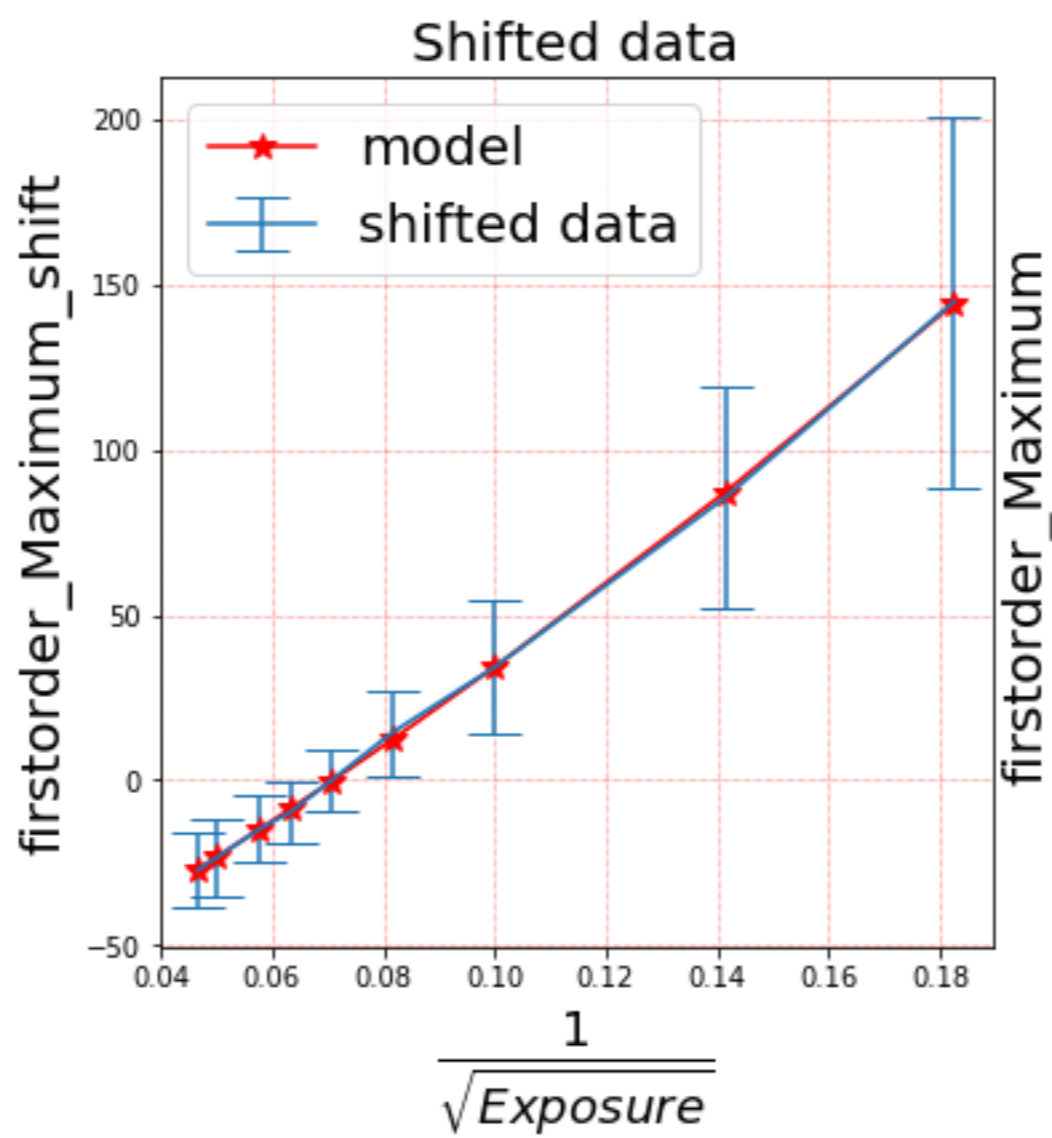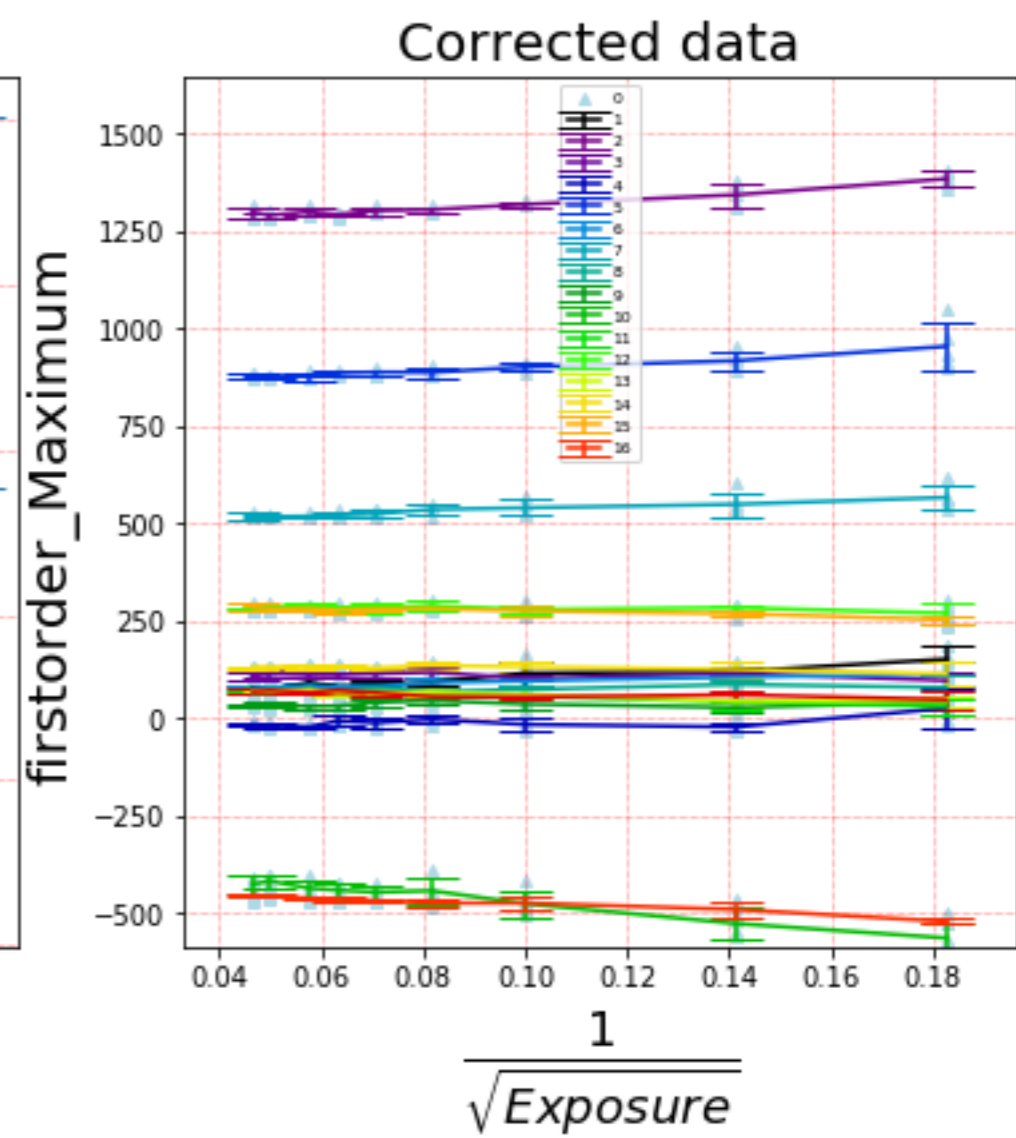

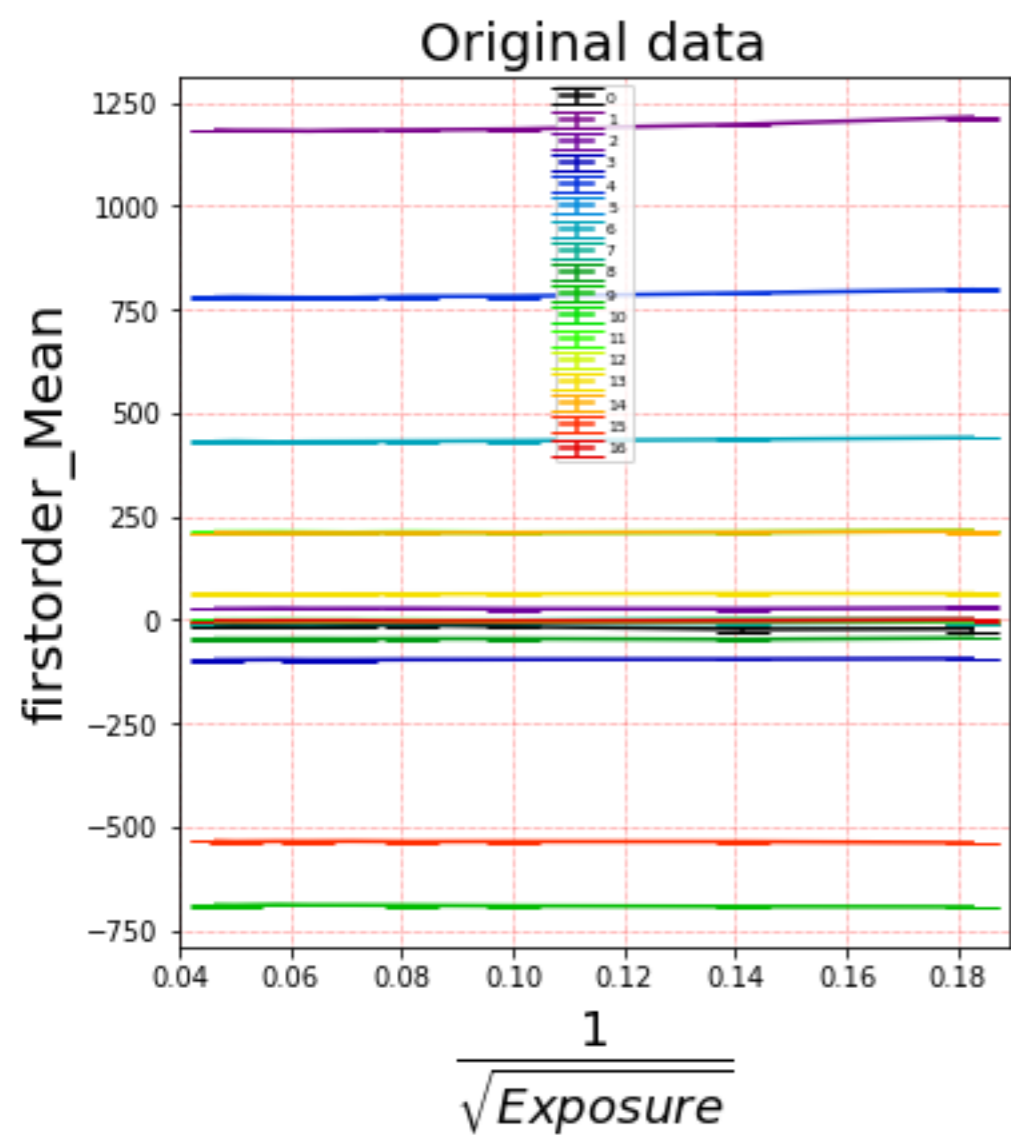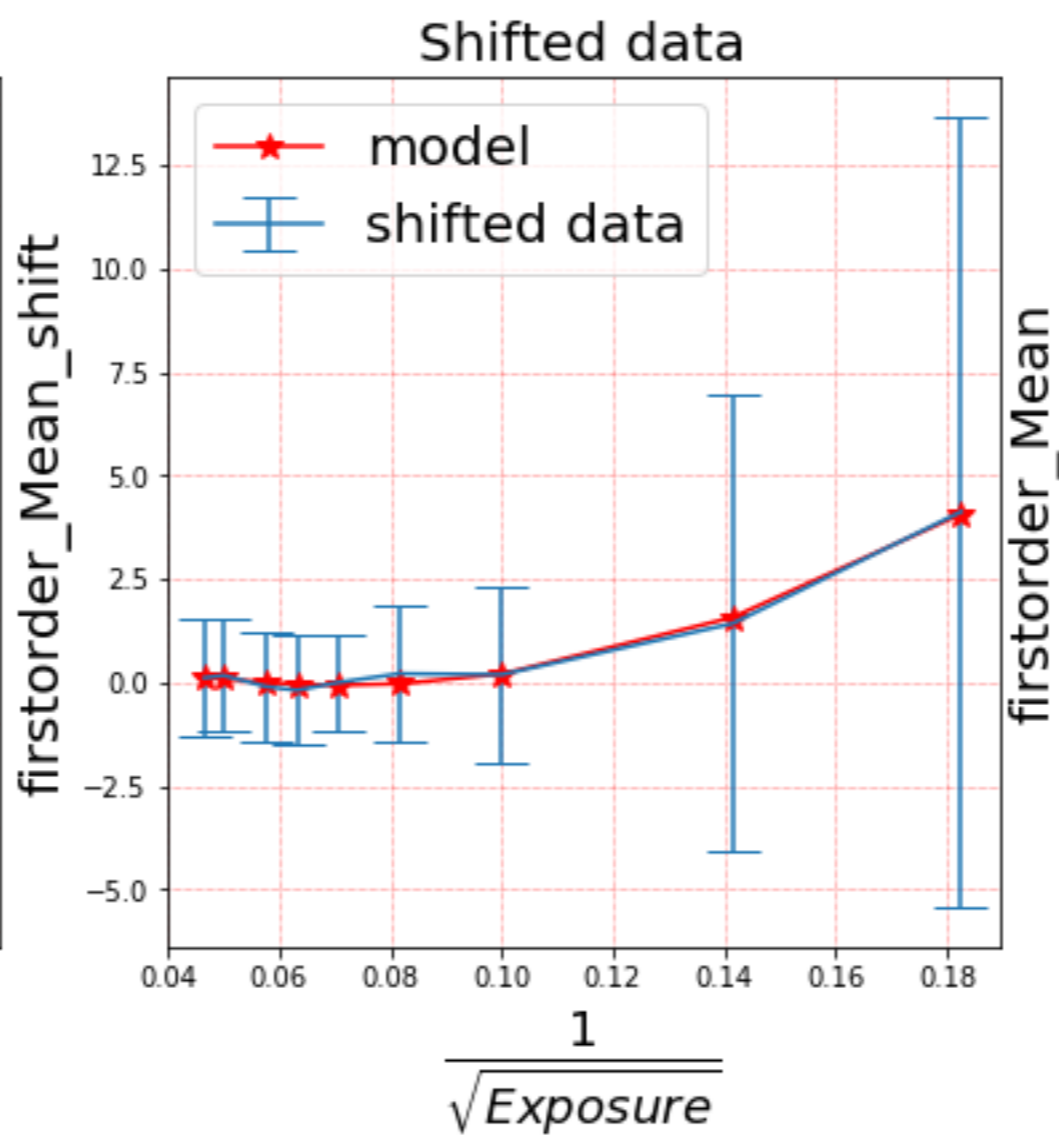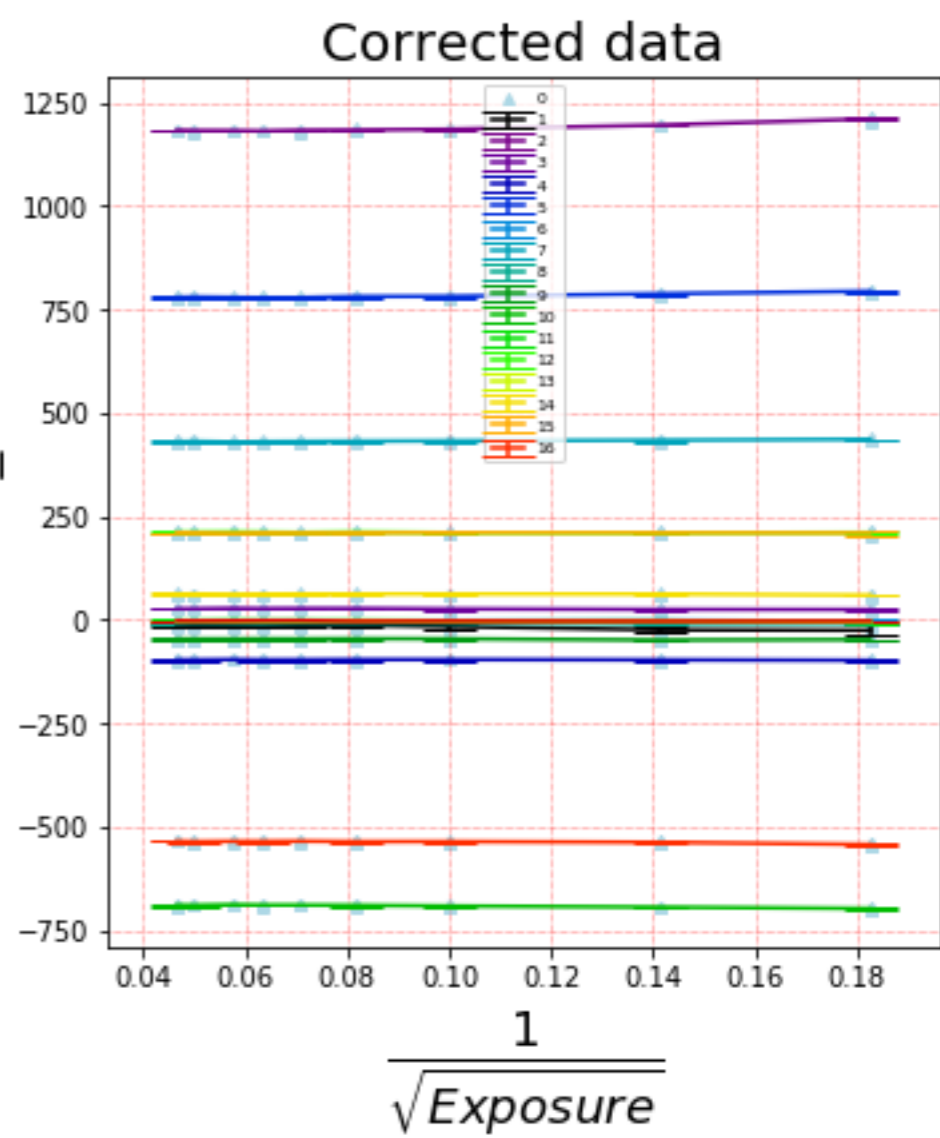



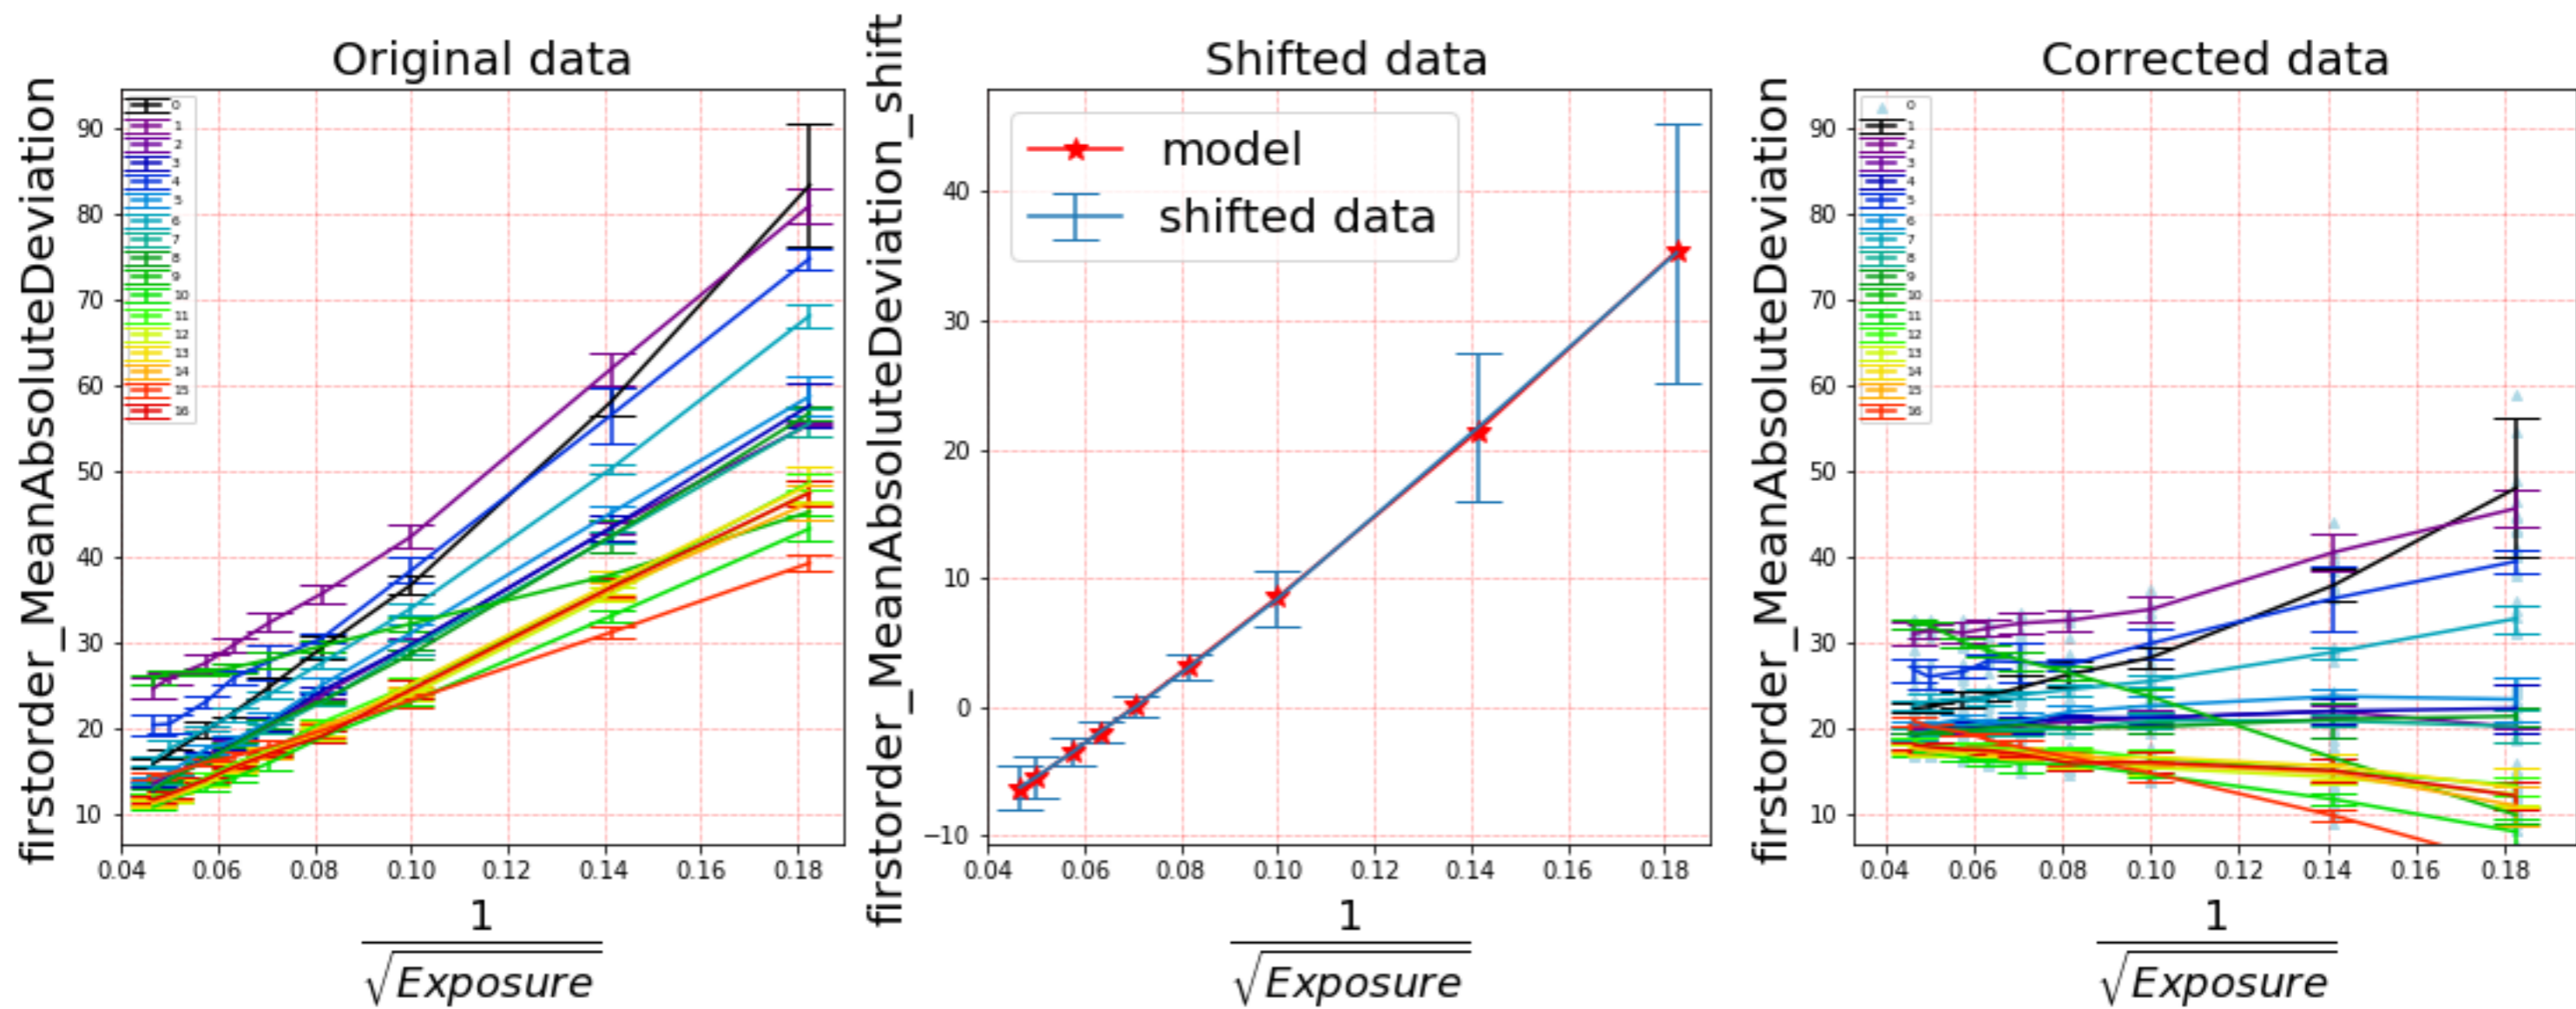

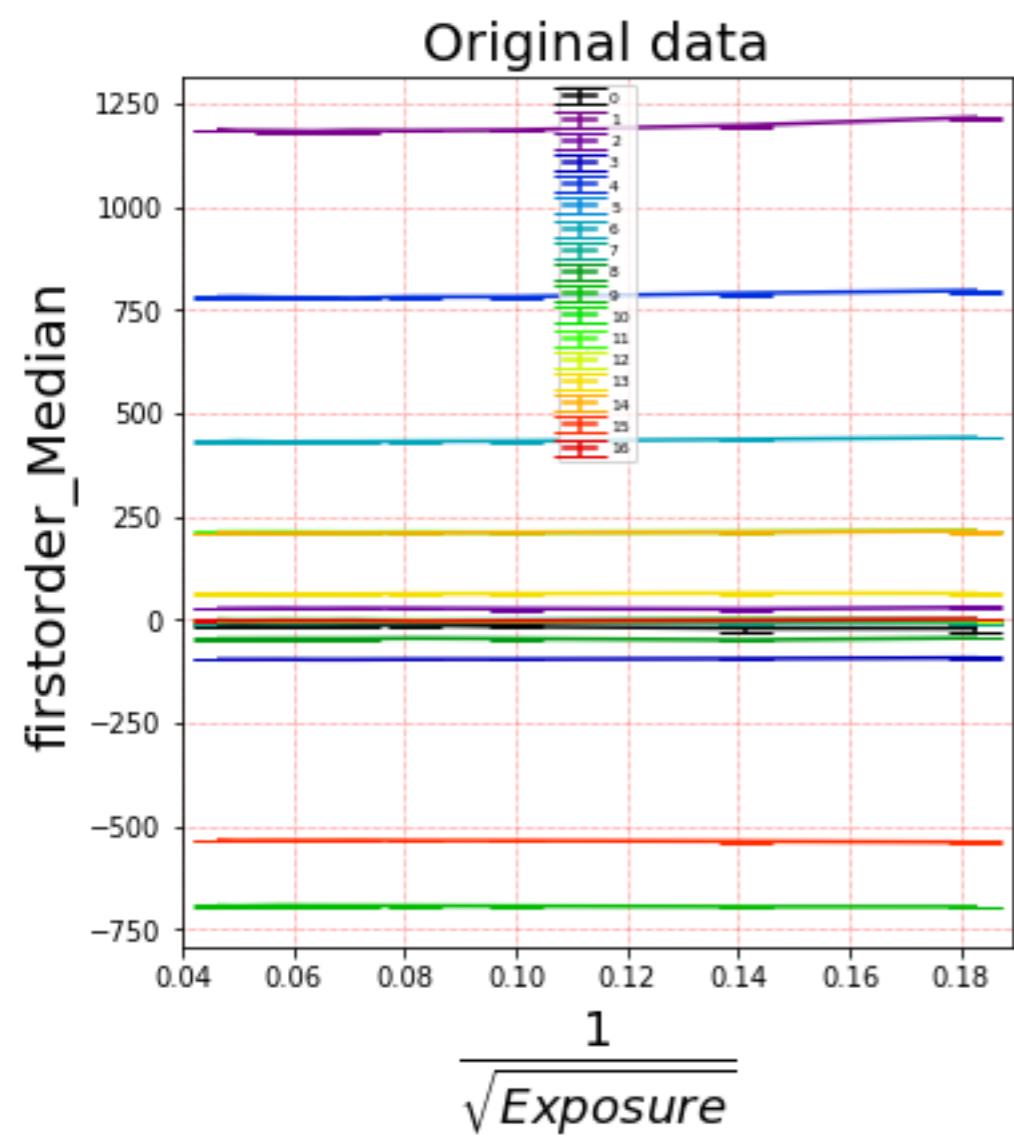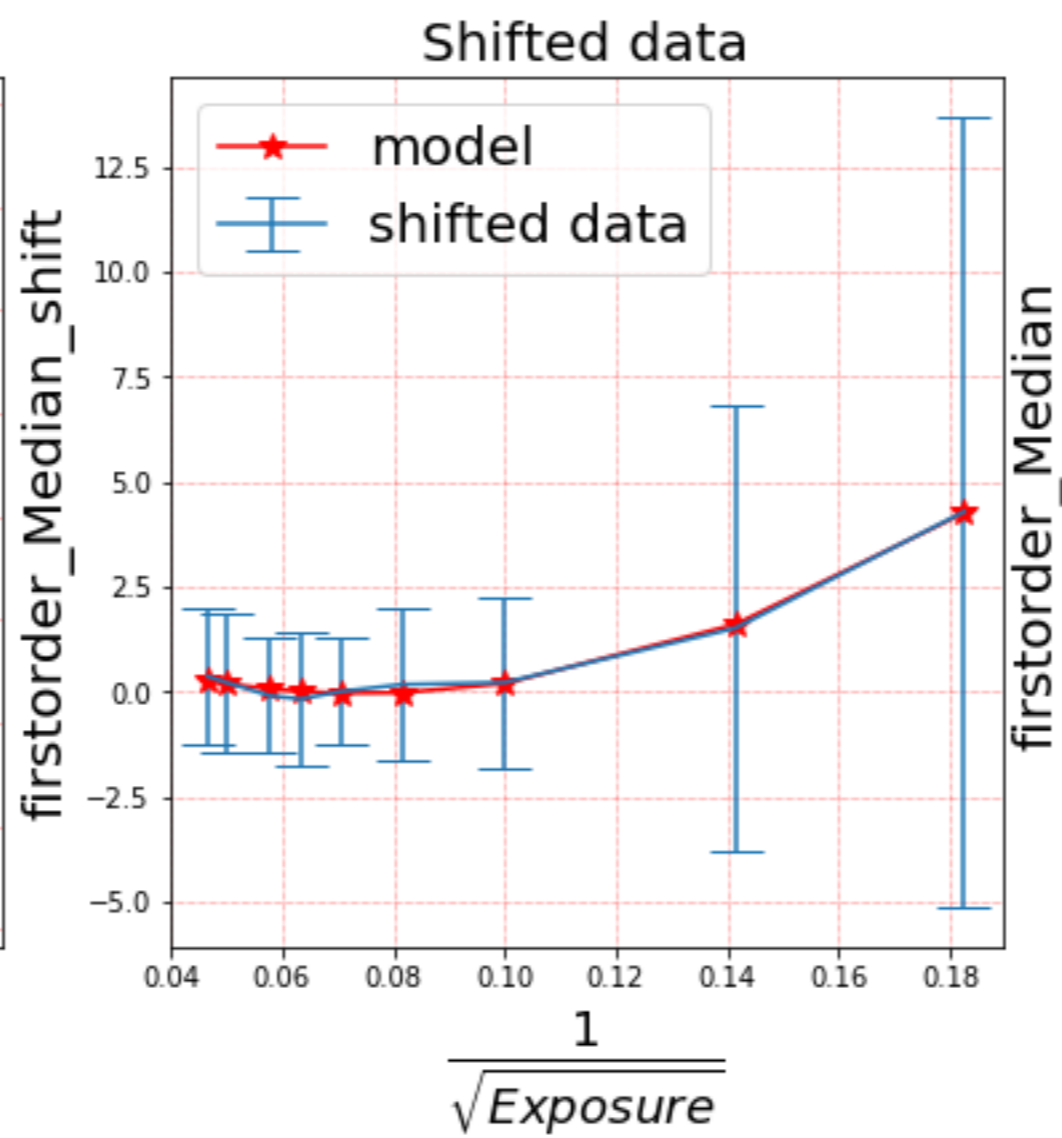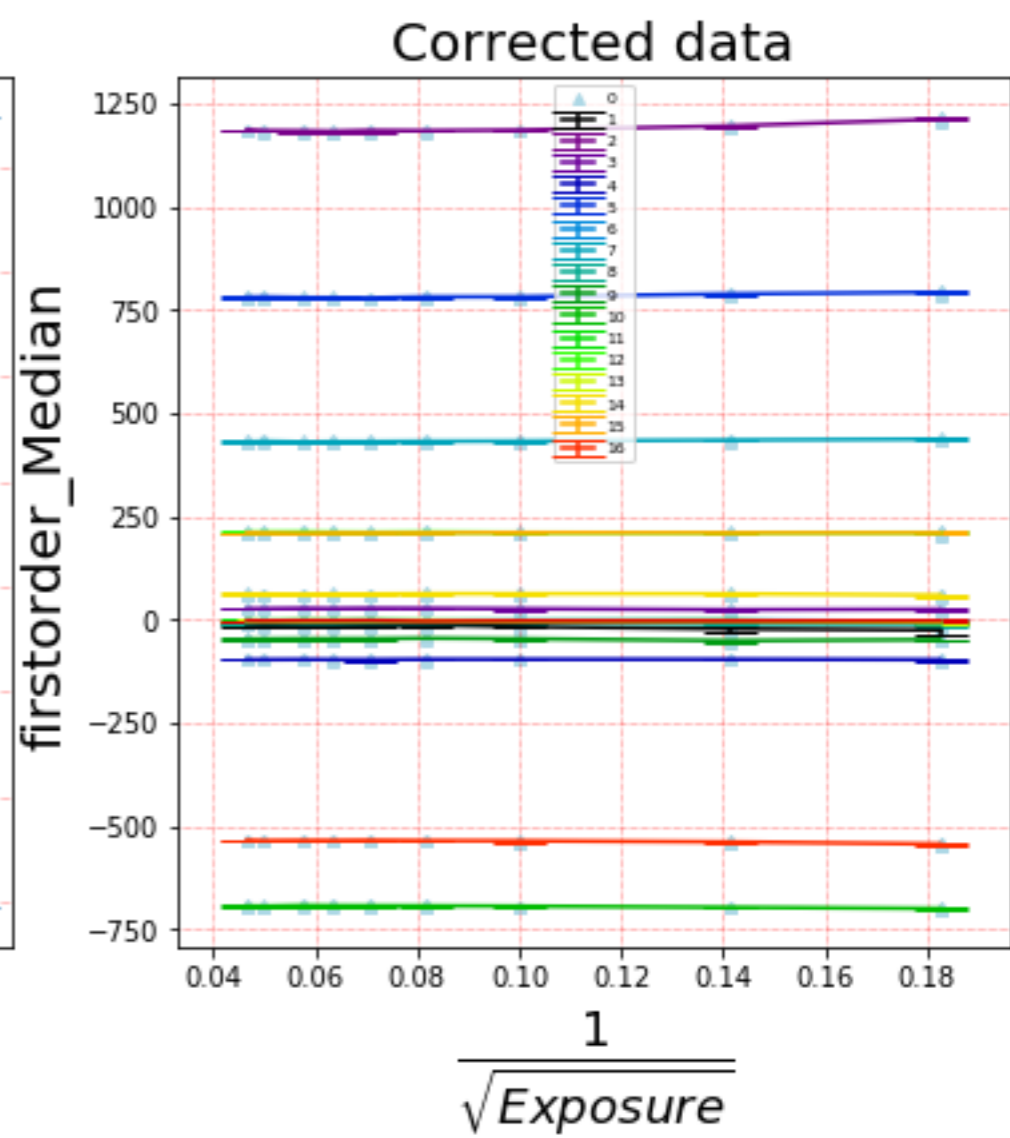

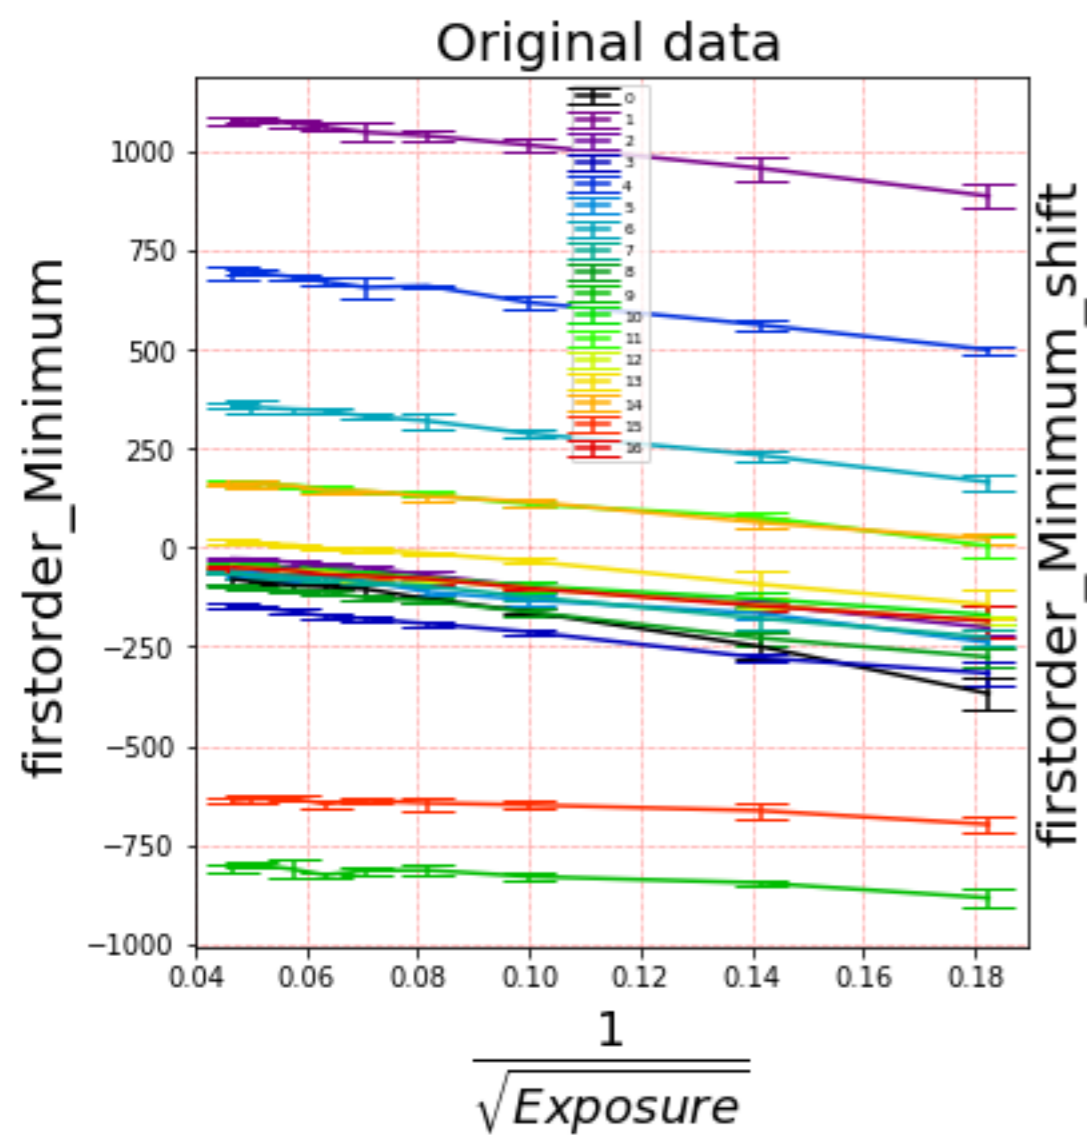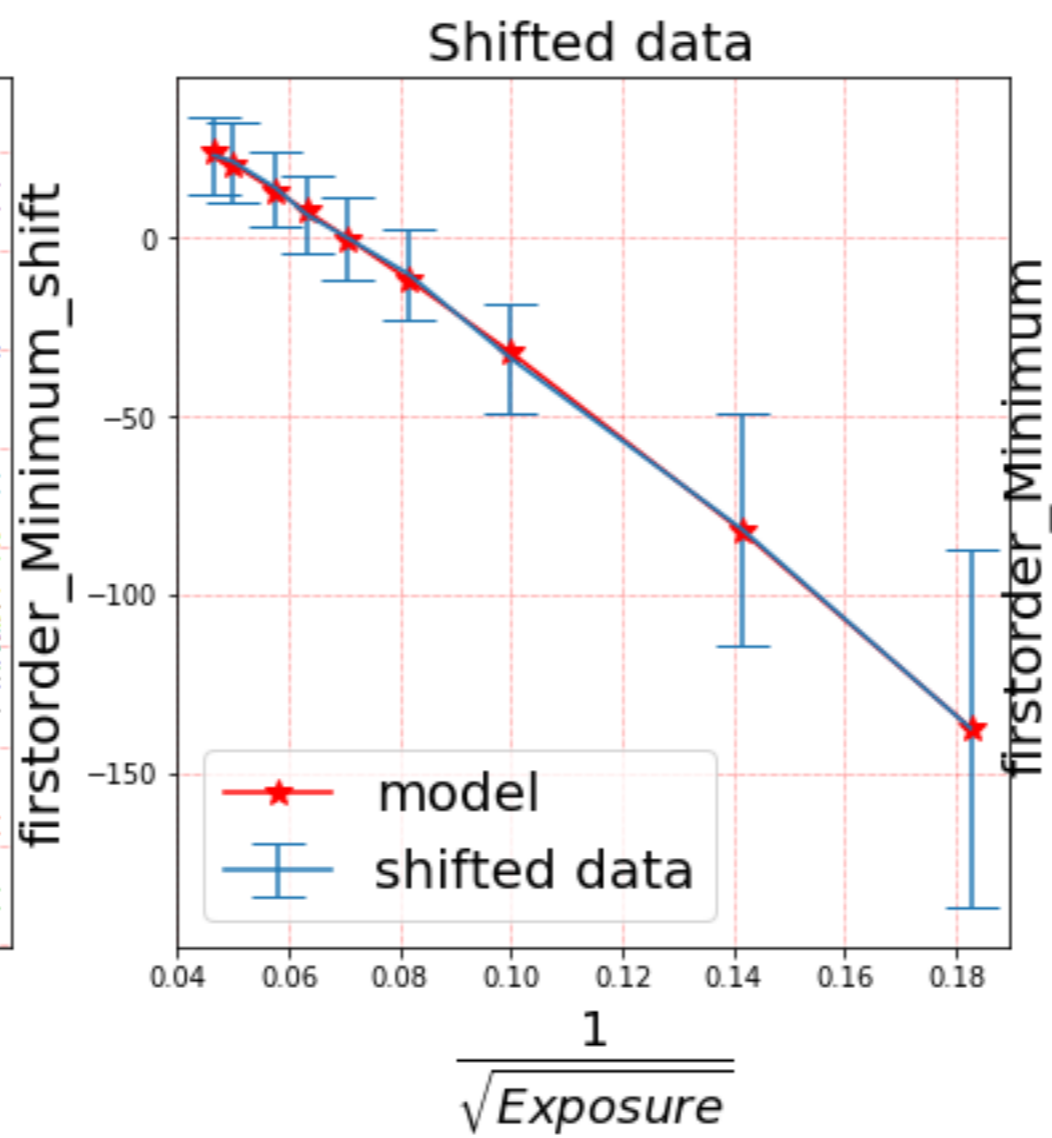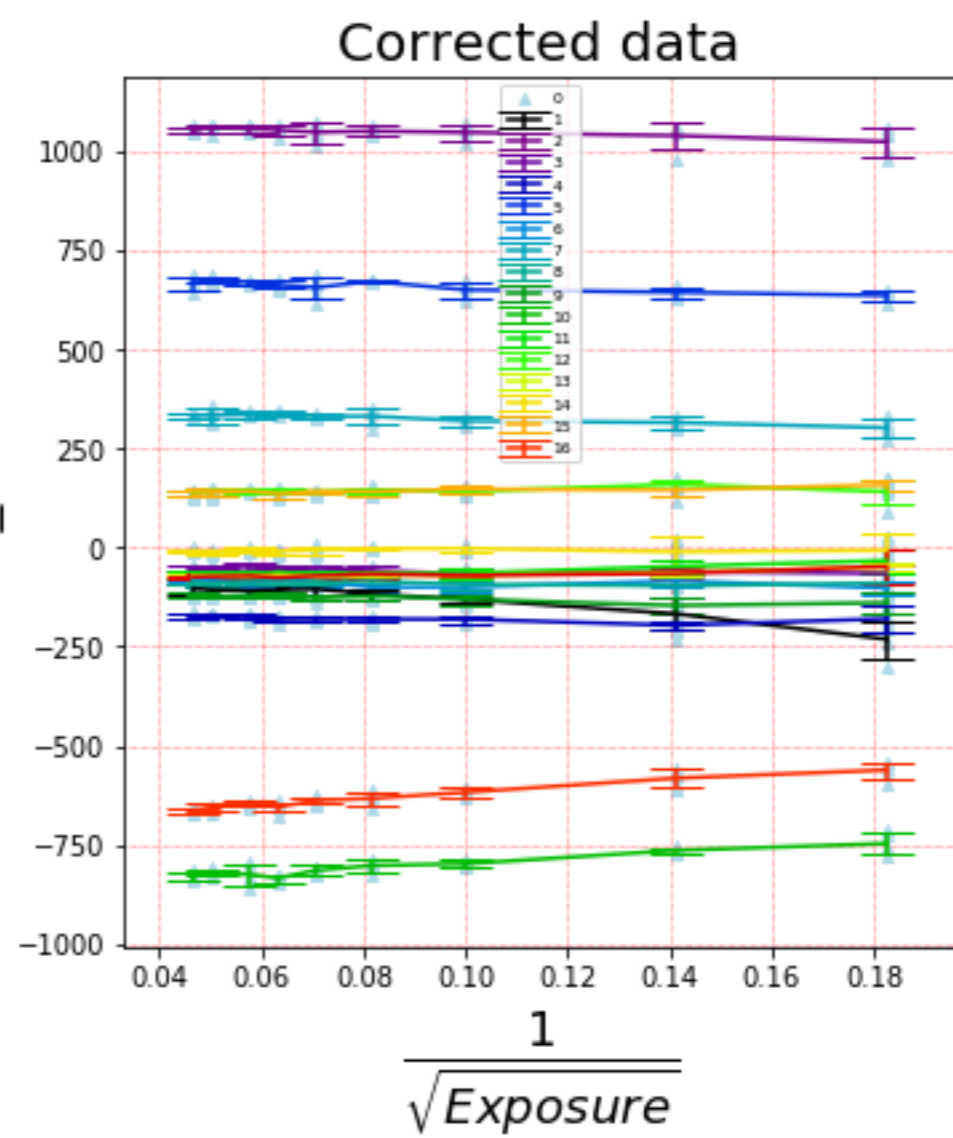

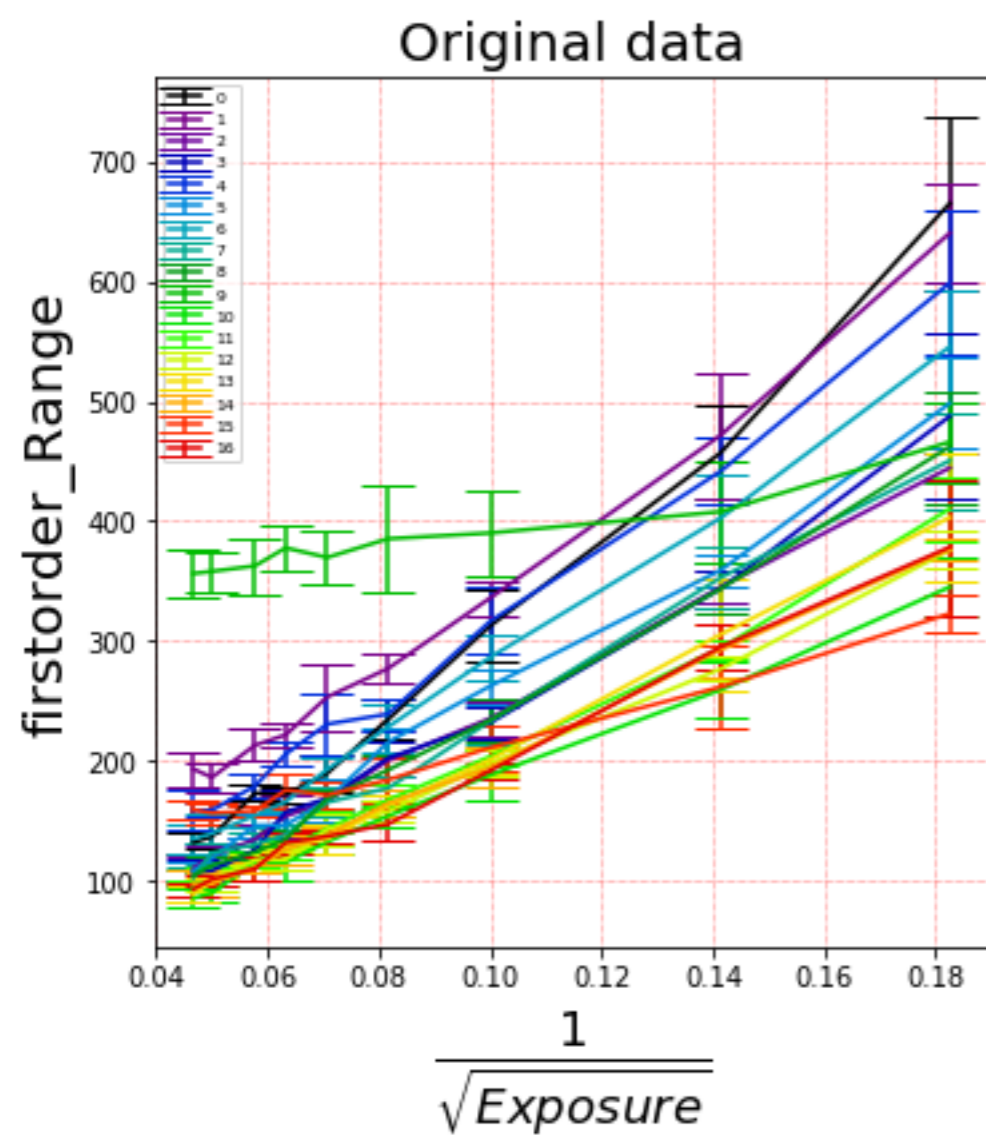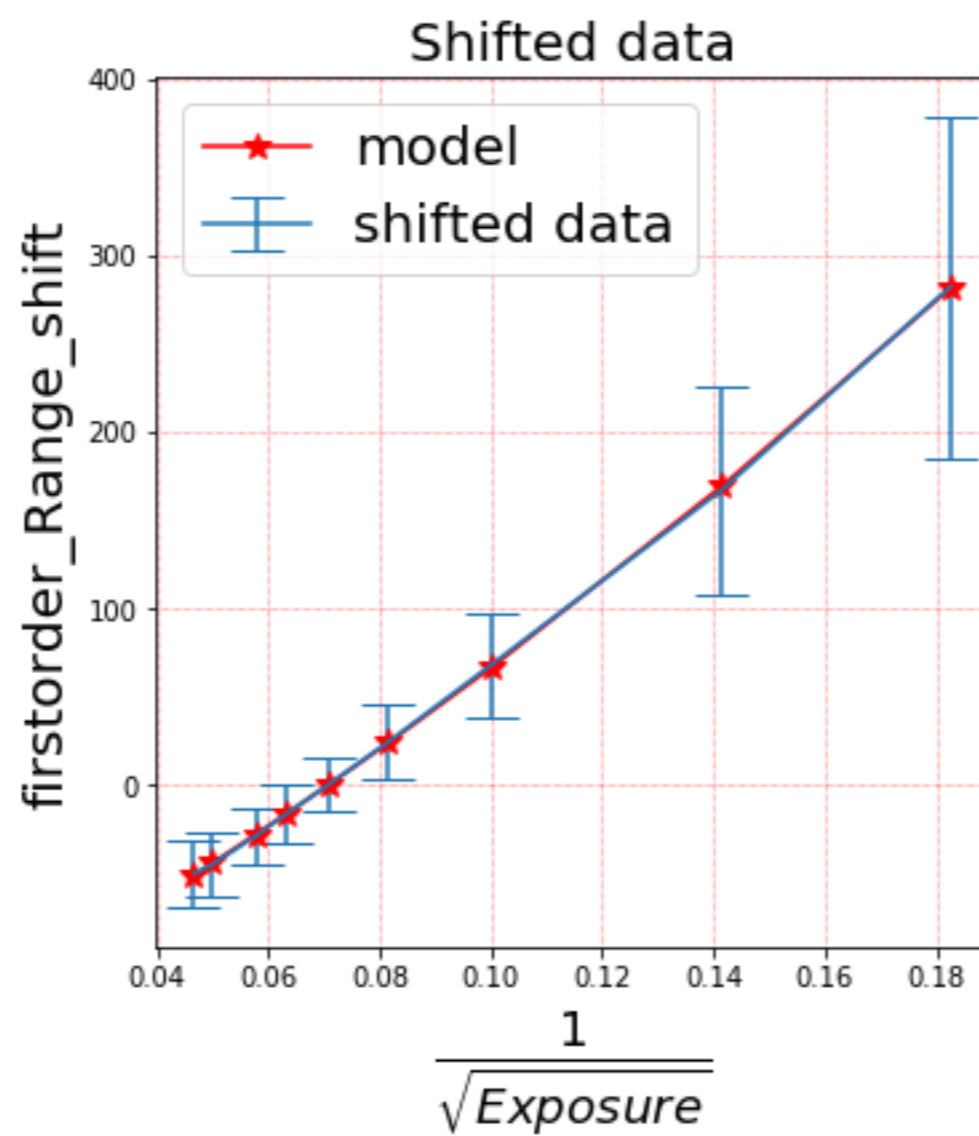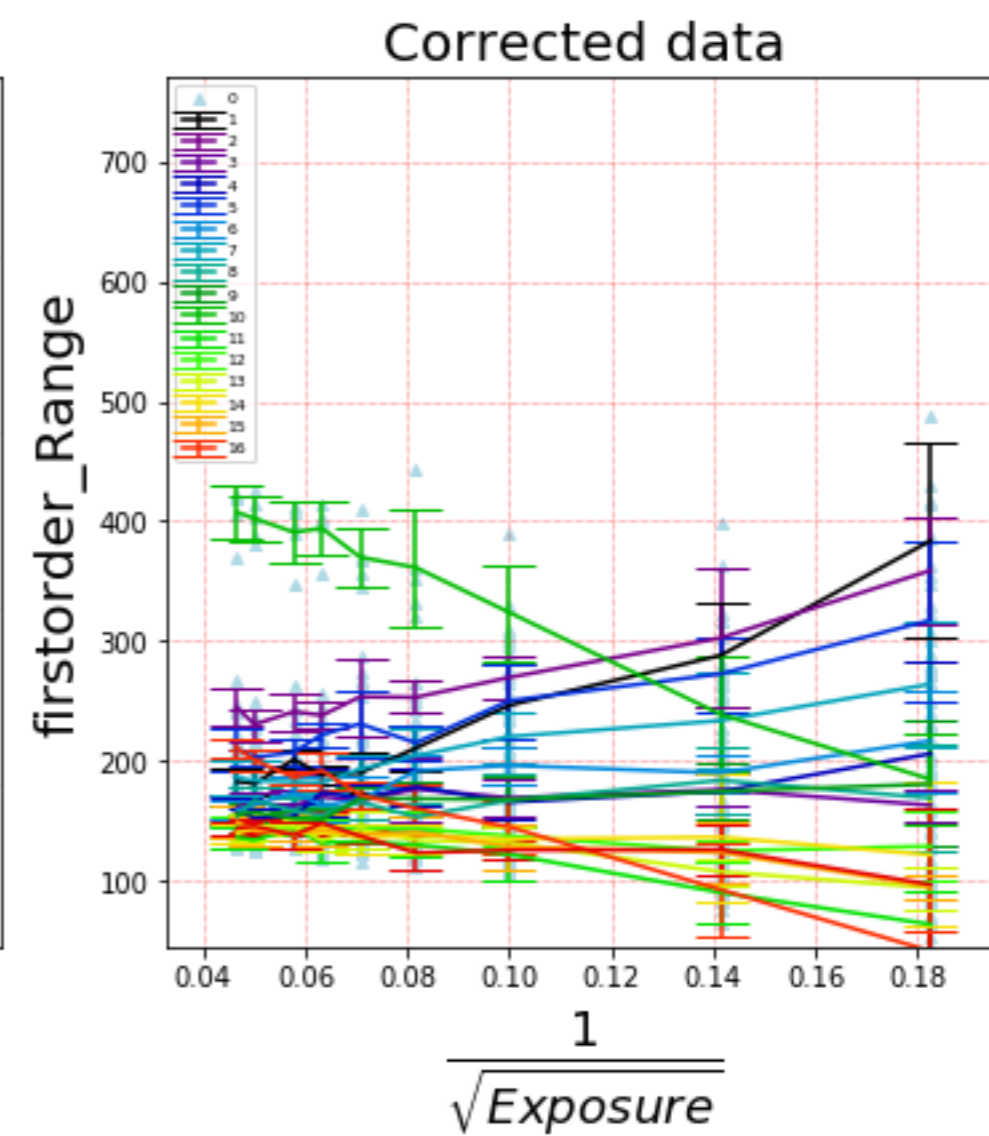



firstorder\_RobustMeanAbsoluteDeviation

Original data

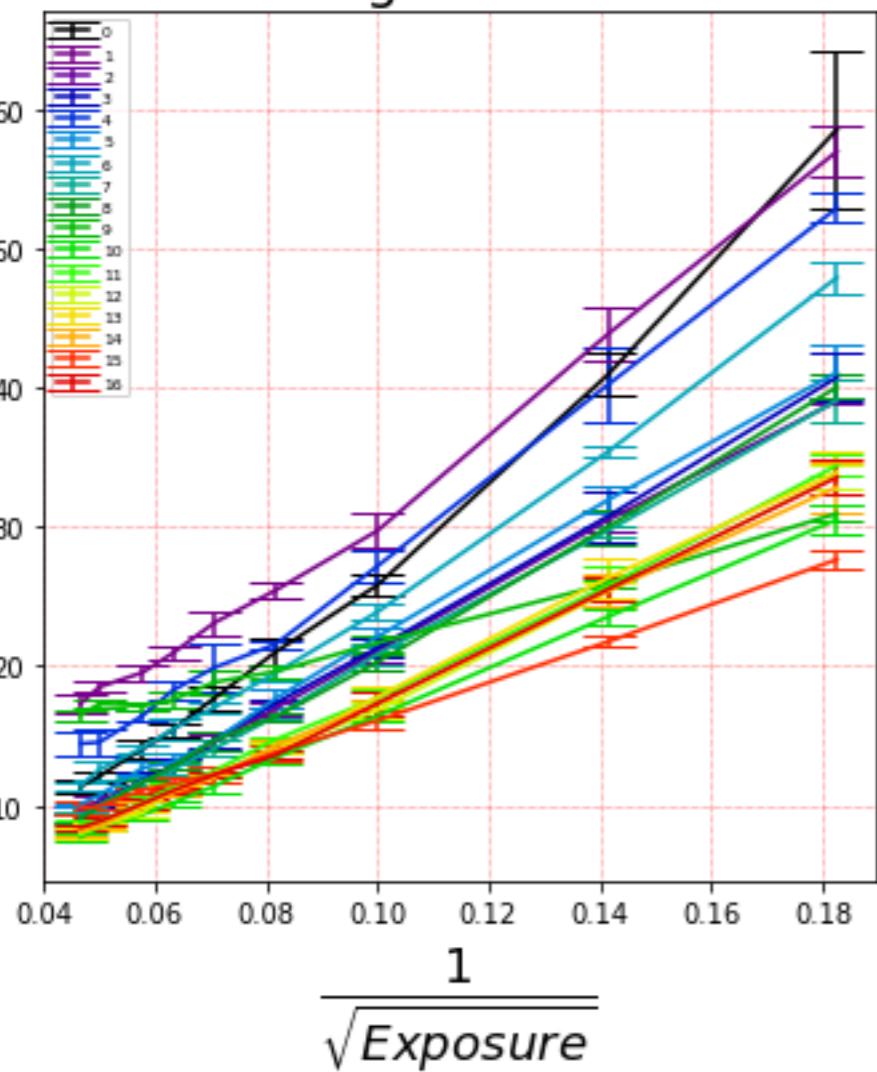

firstorder\_RobustMeanAbsoluteDeviation\_shift

Shifted data

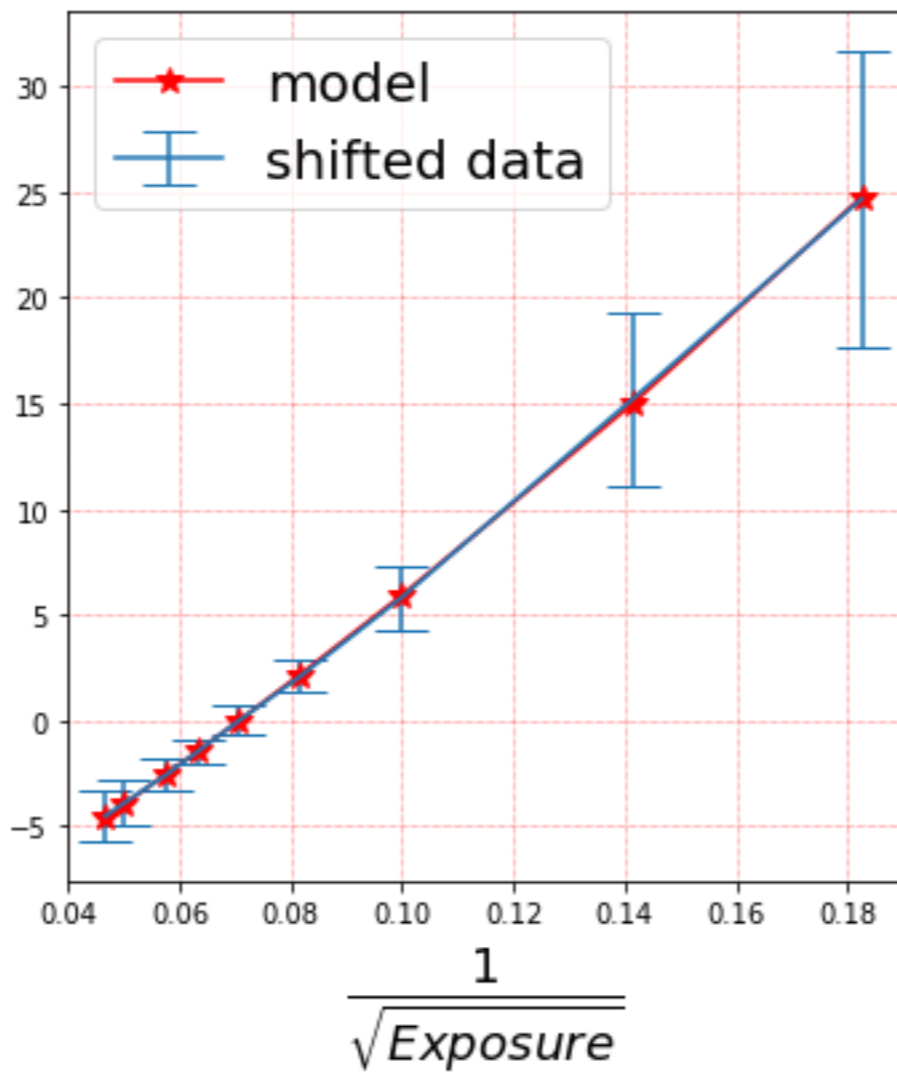

firstorder\_RobustMeanAbsoluteDeviation

Corrected data

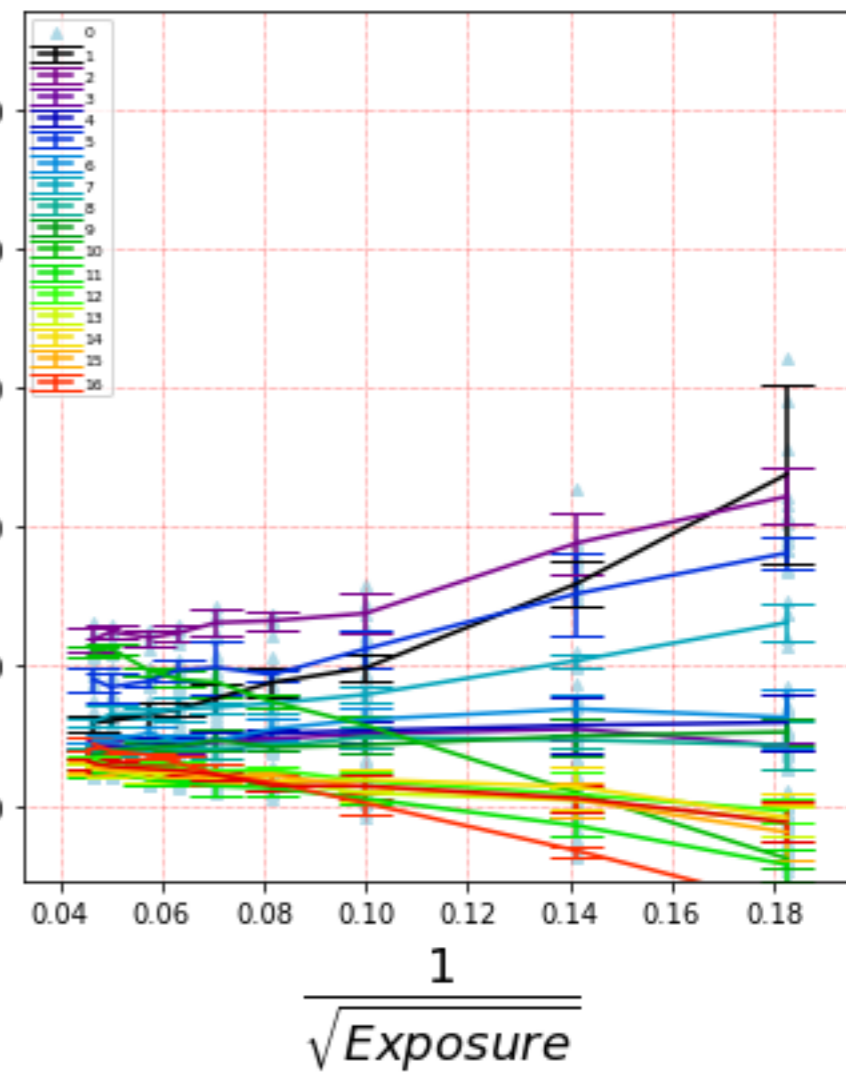

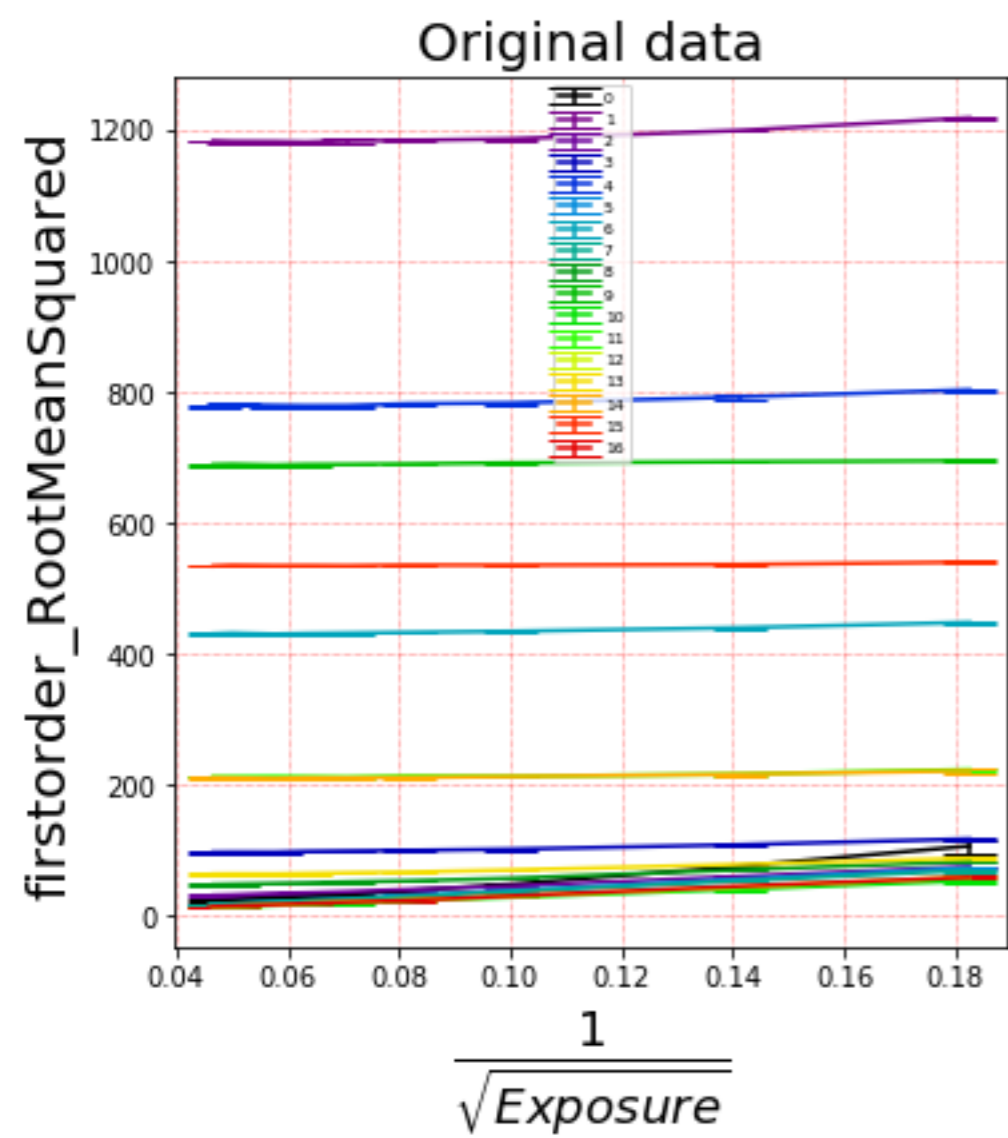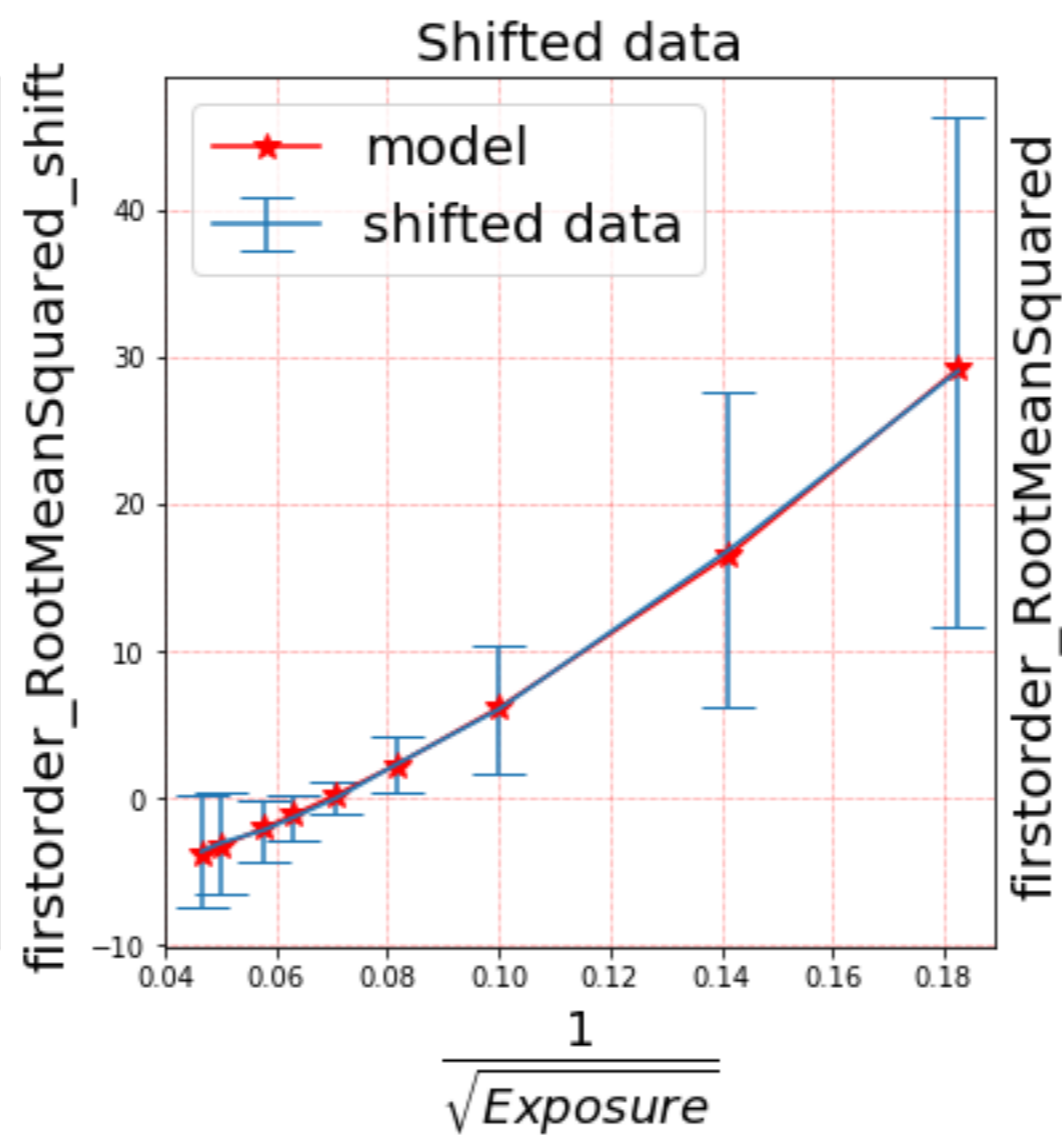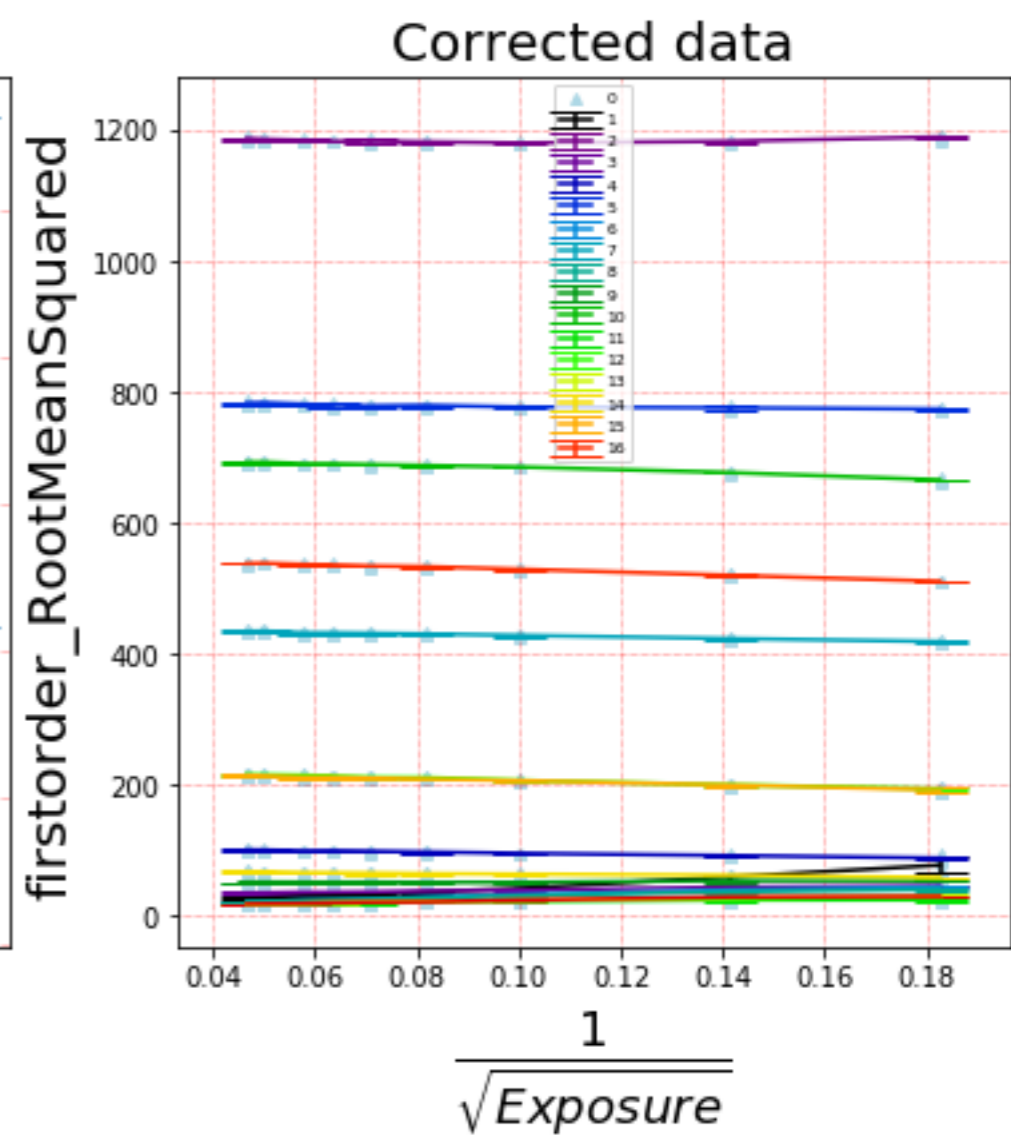

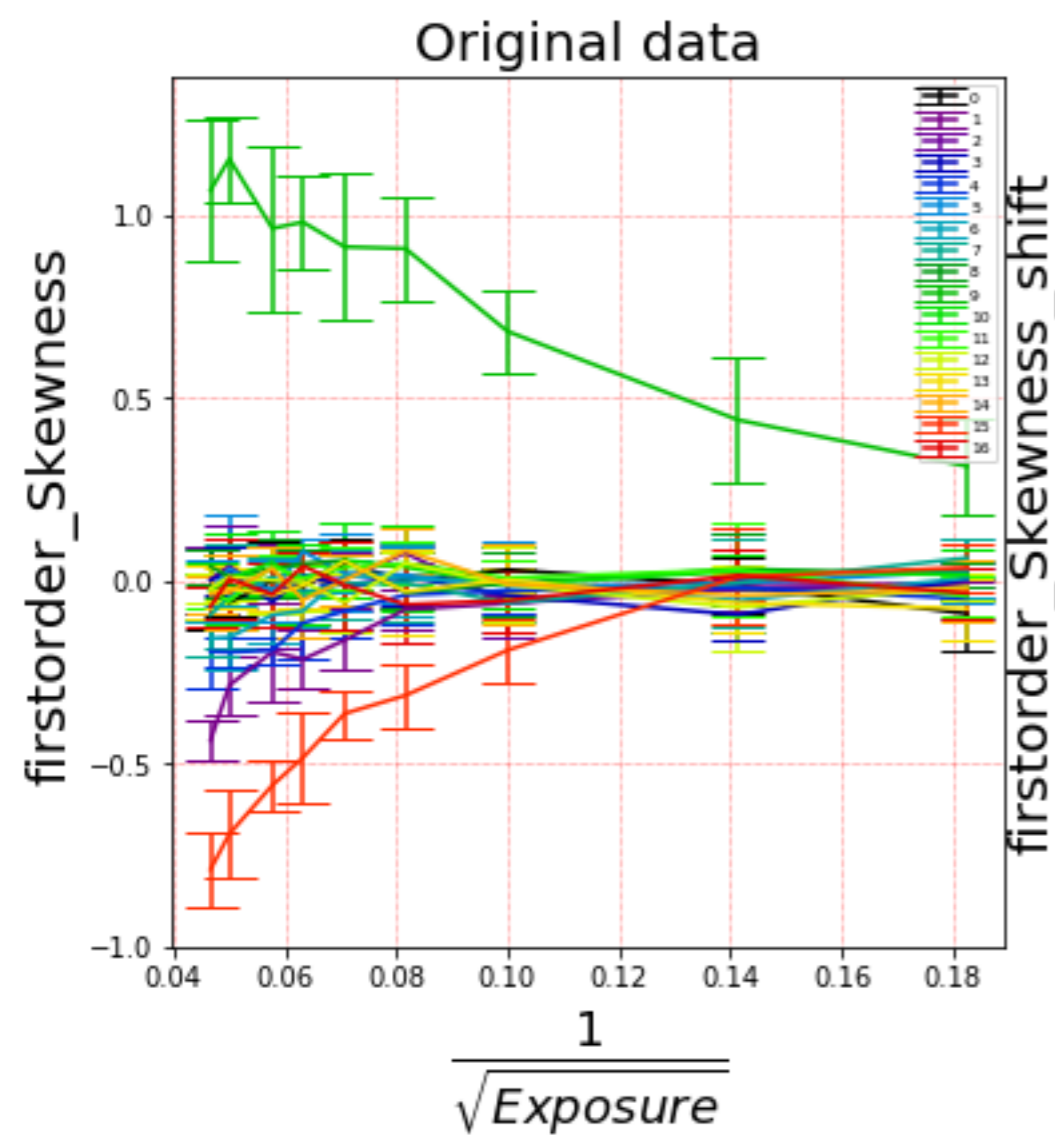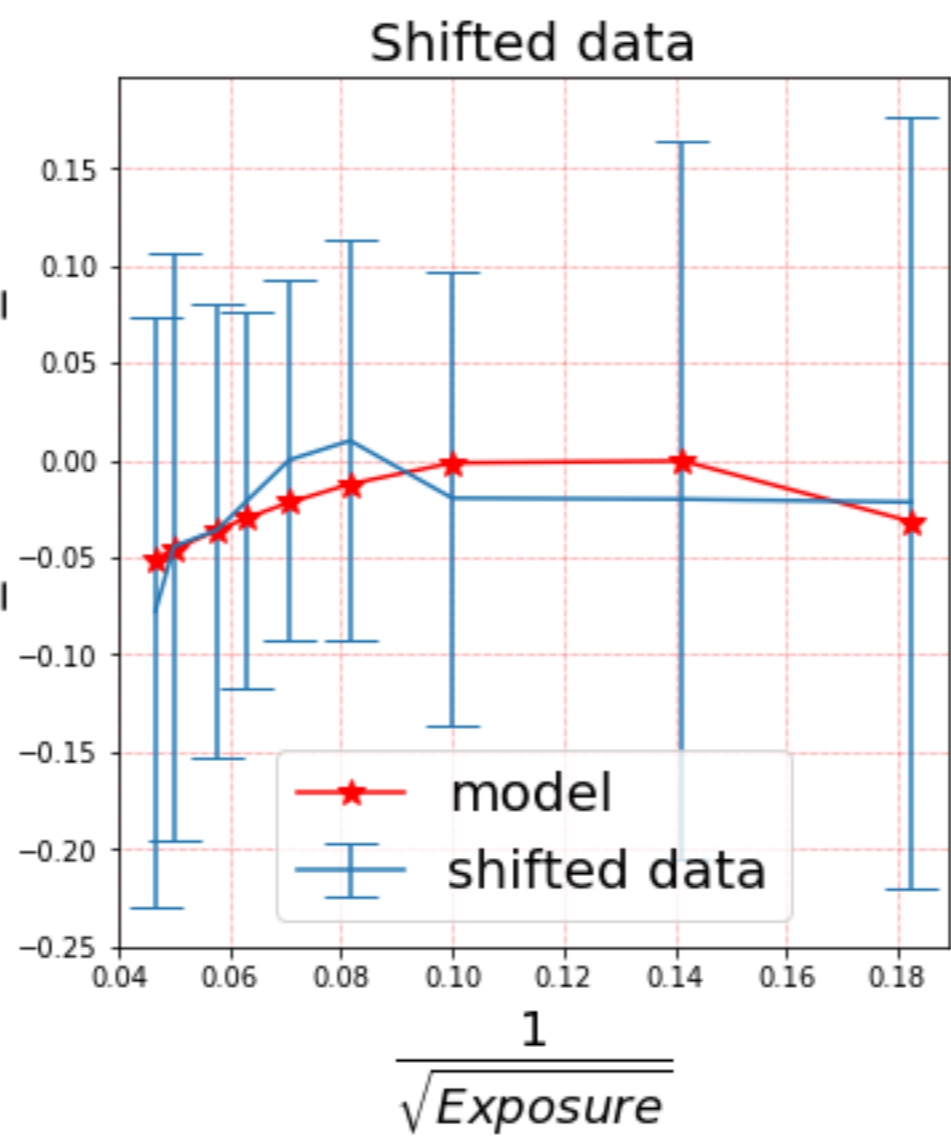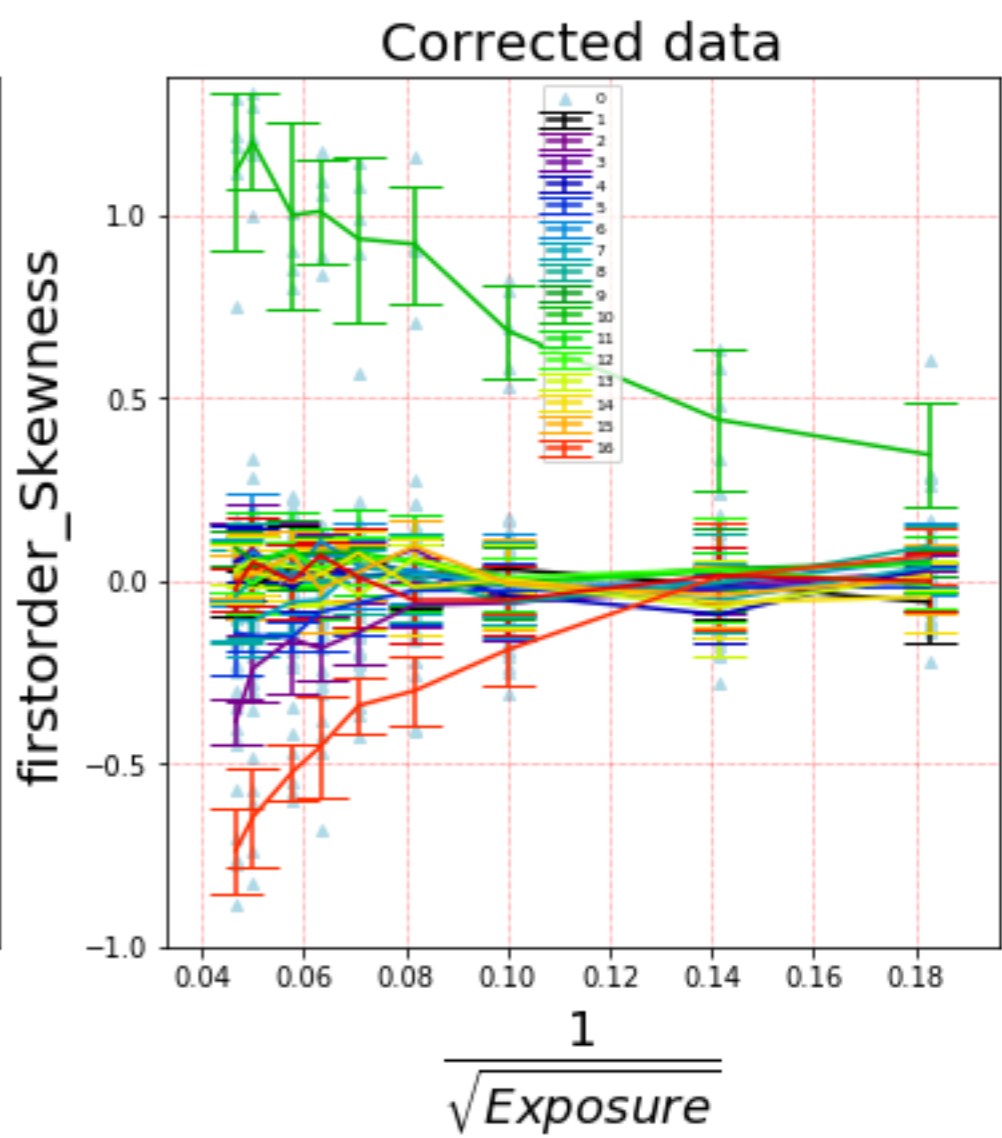

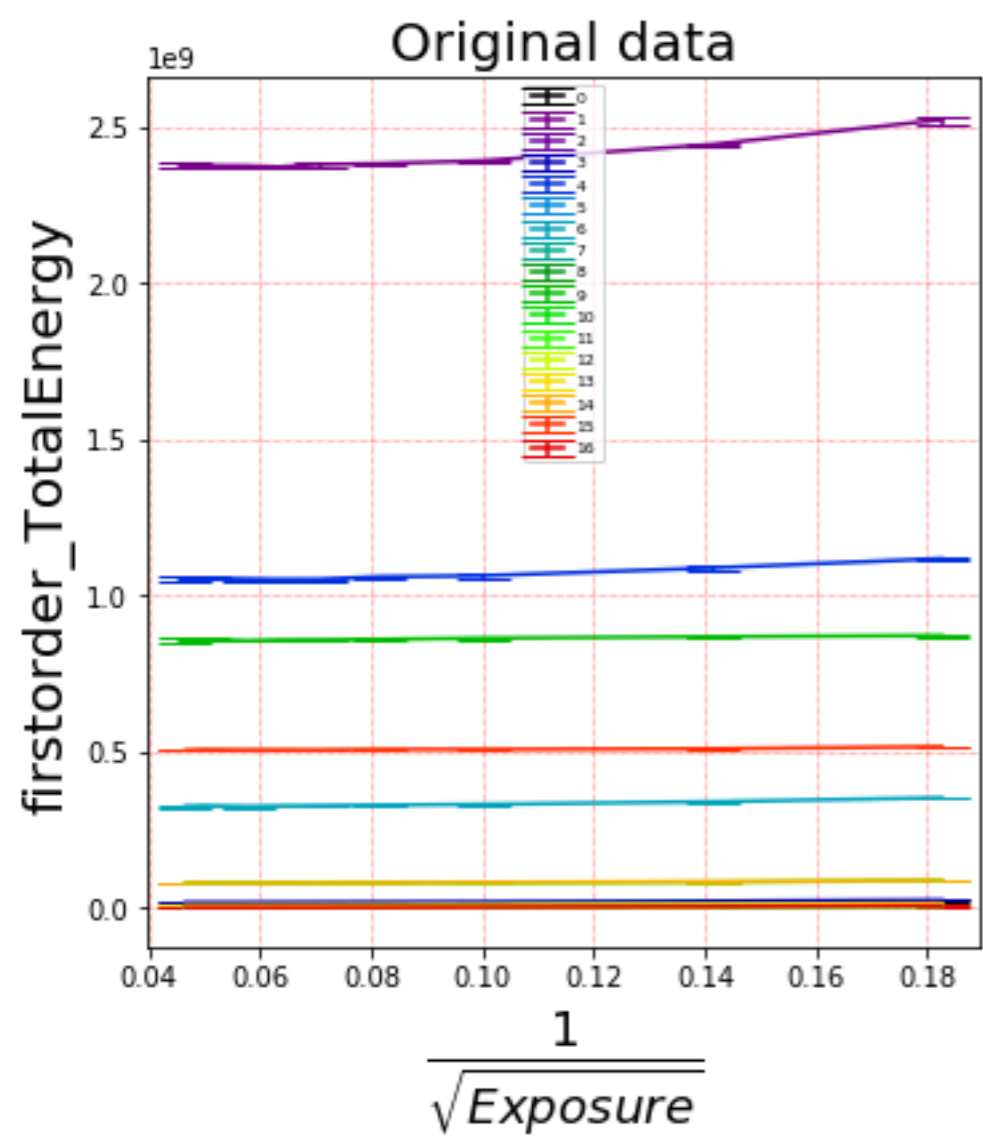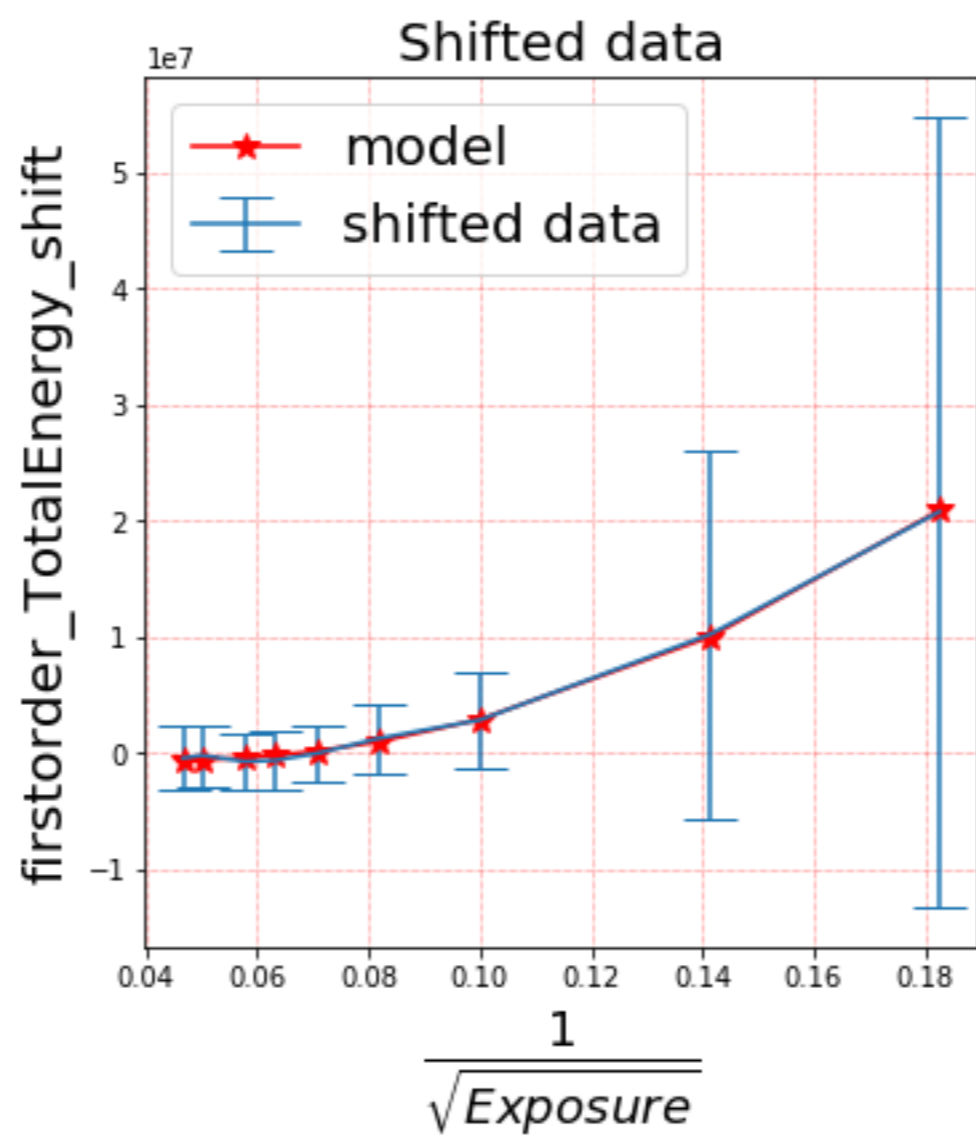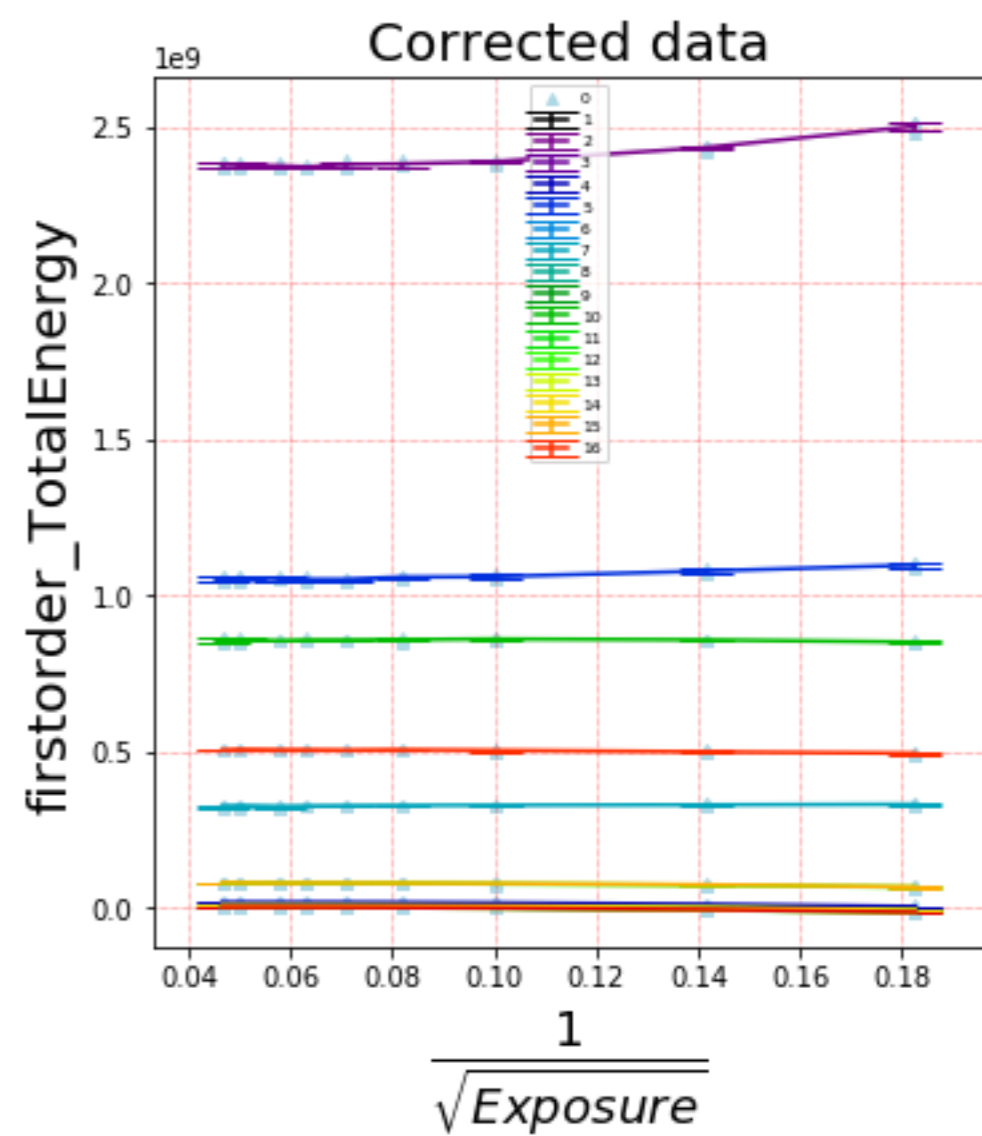



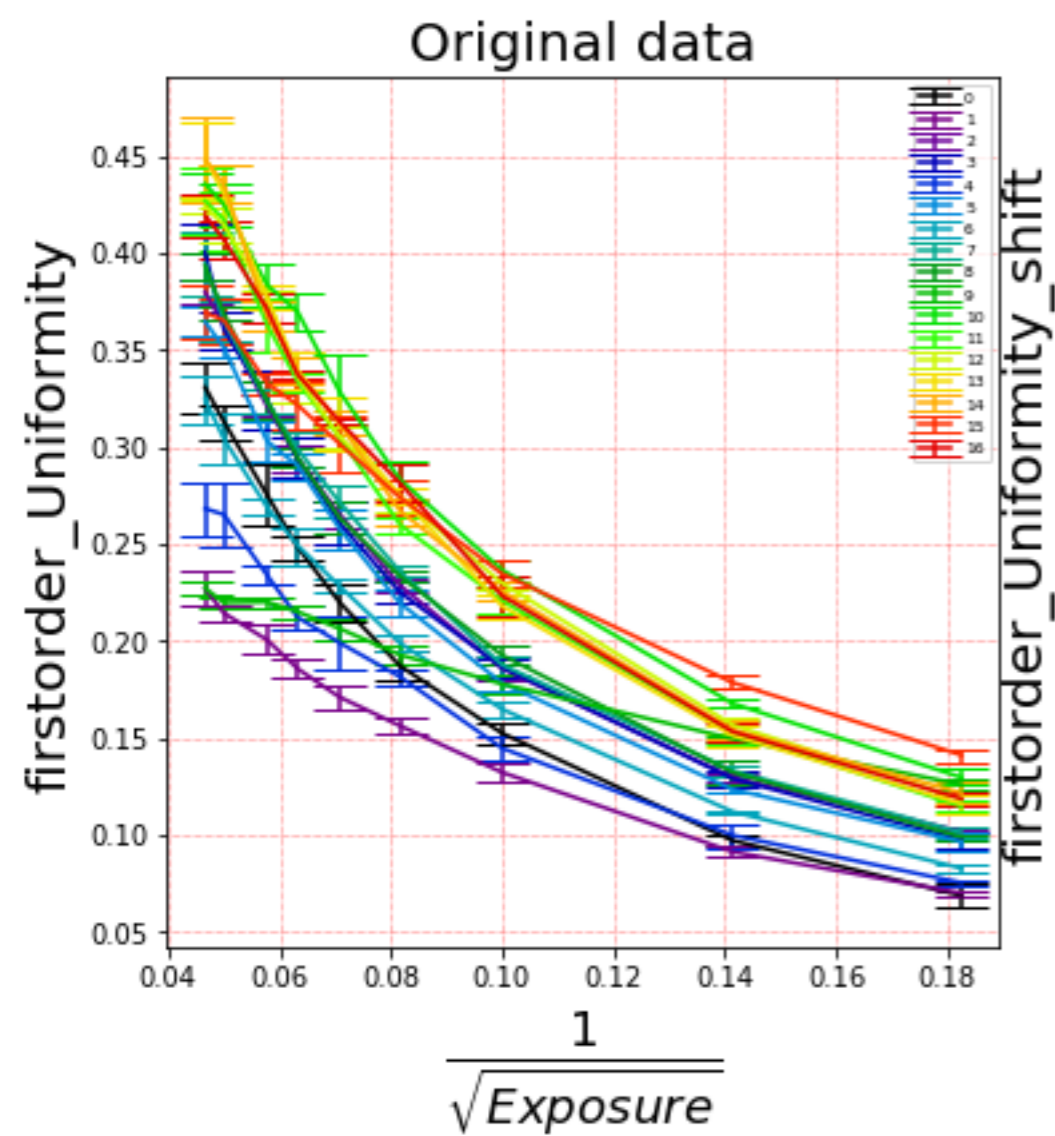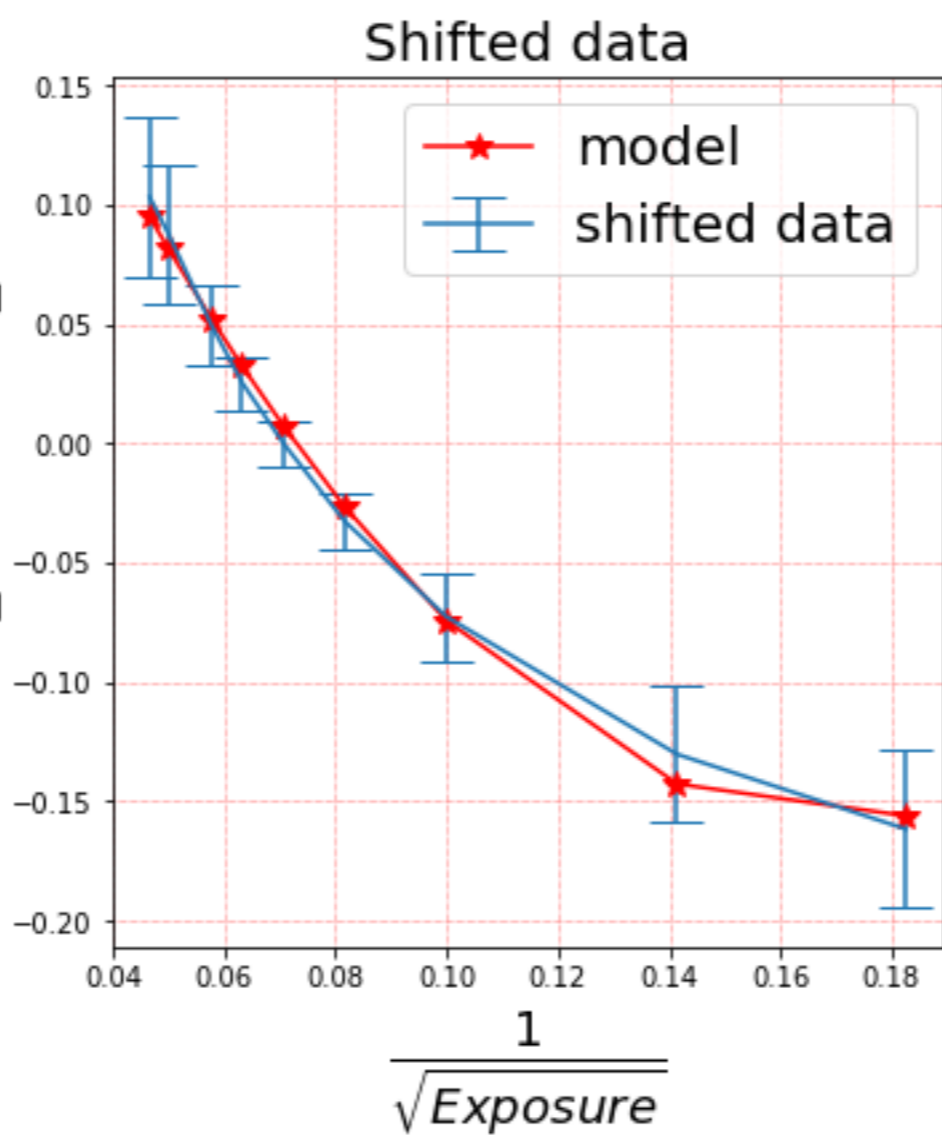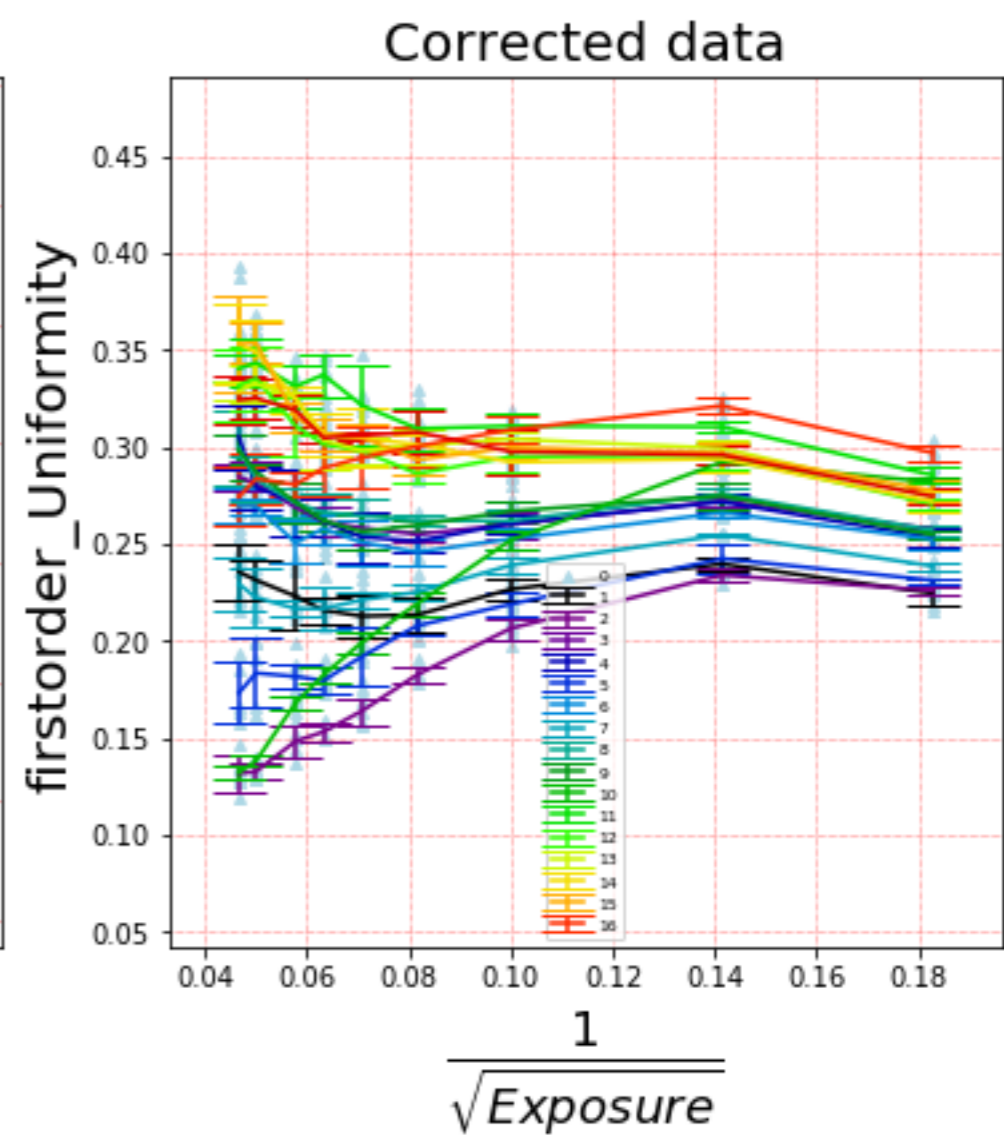

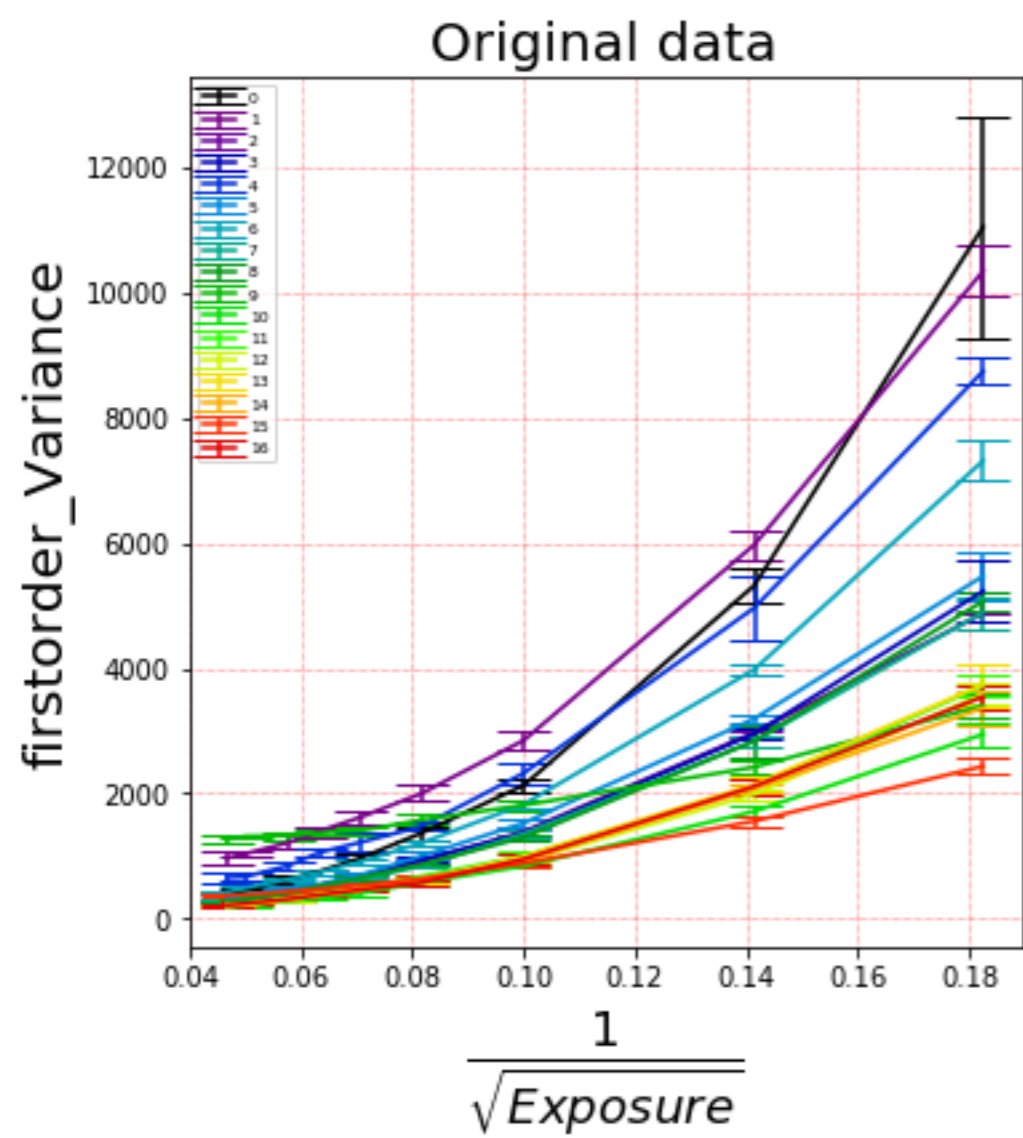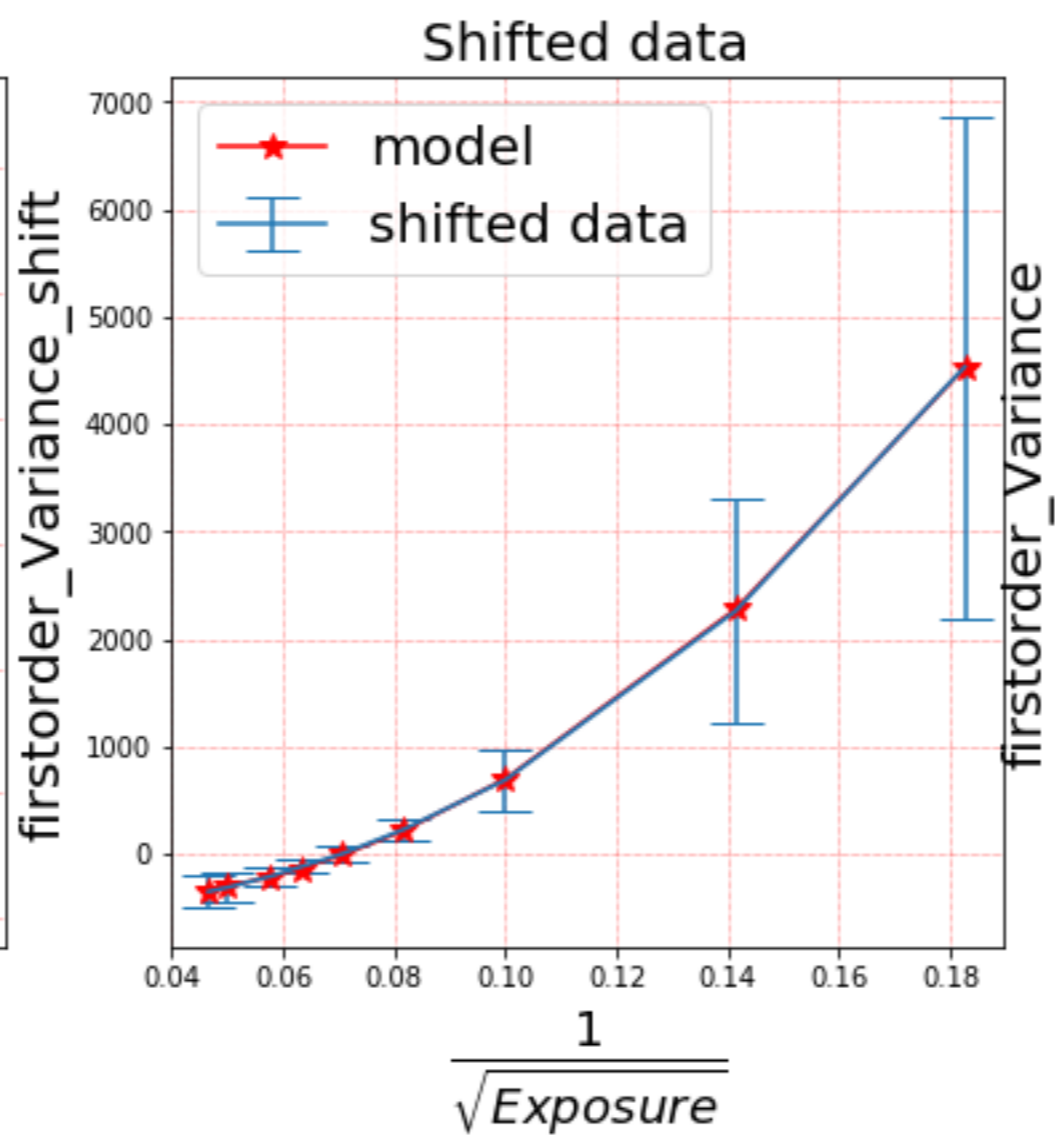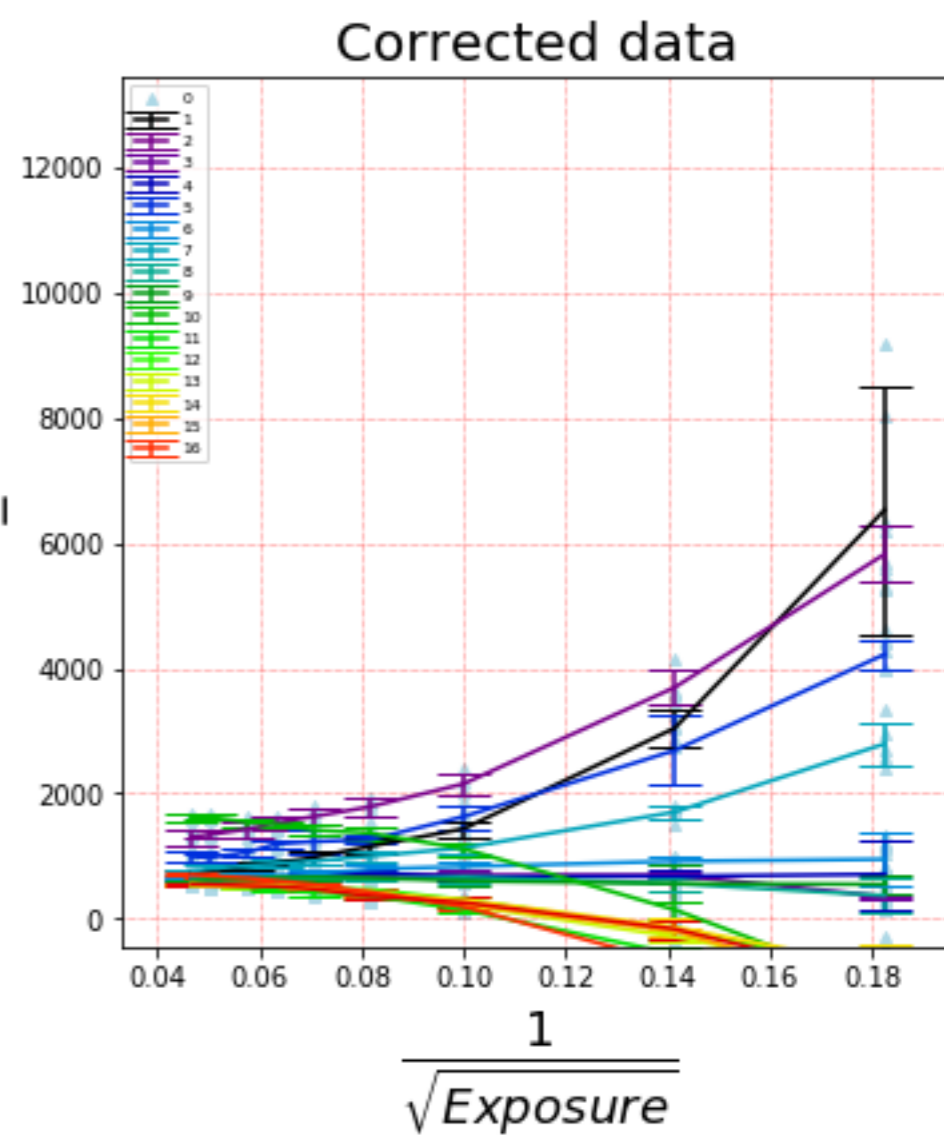

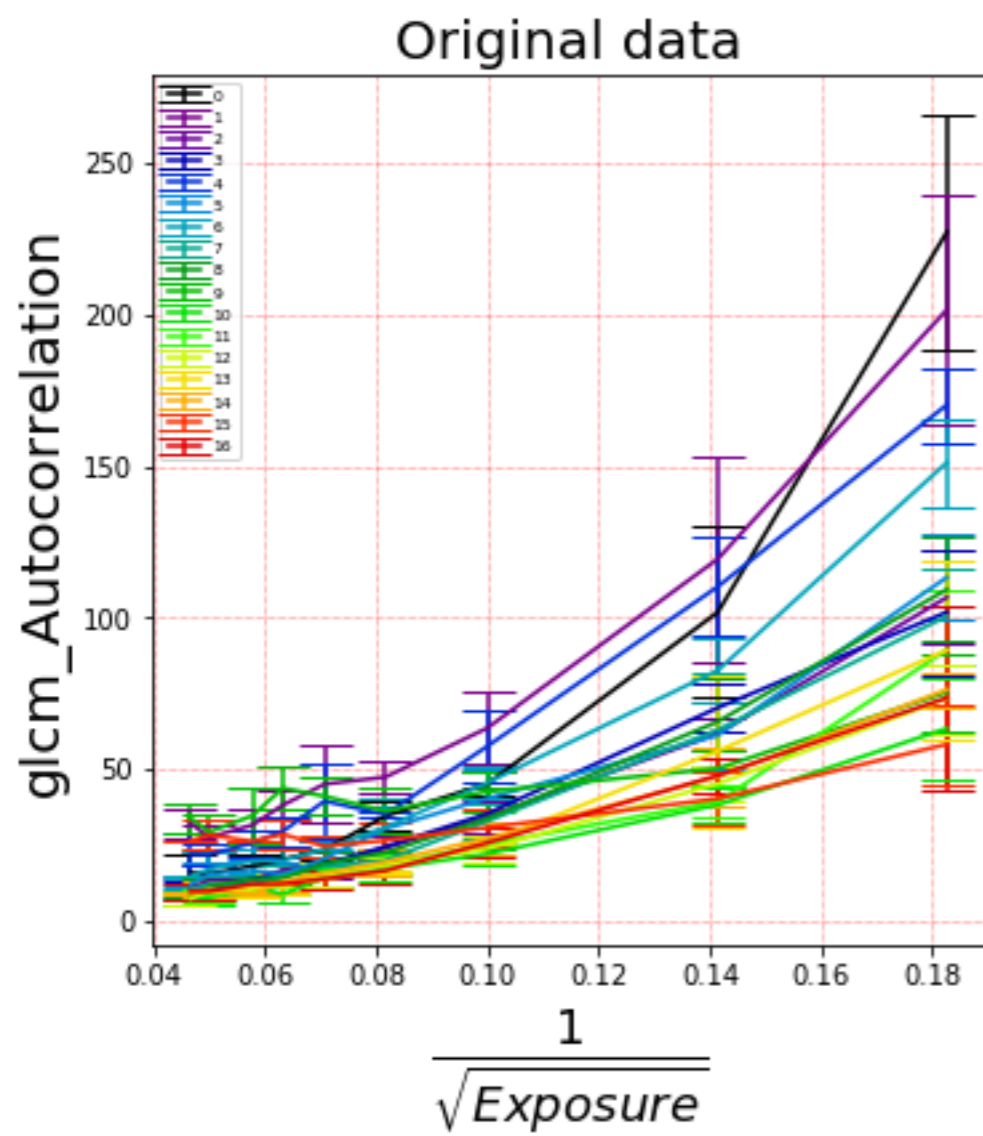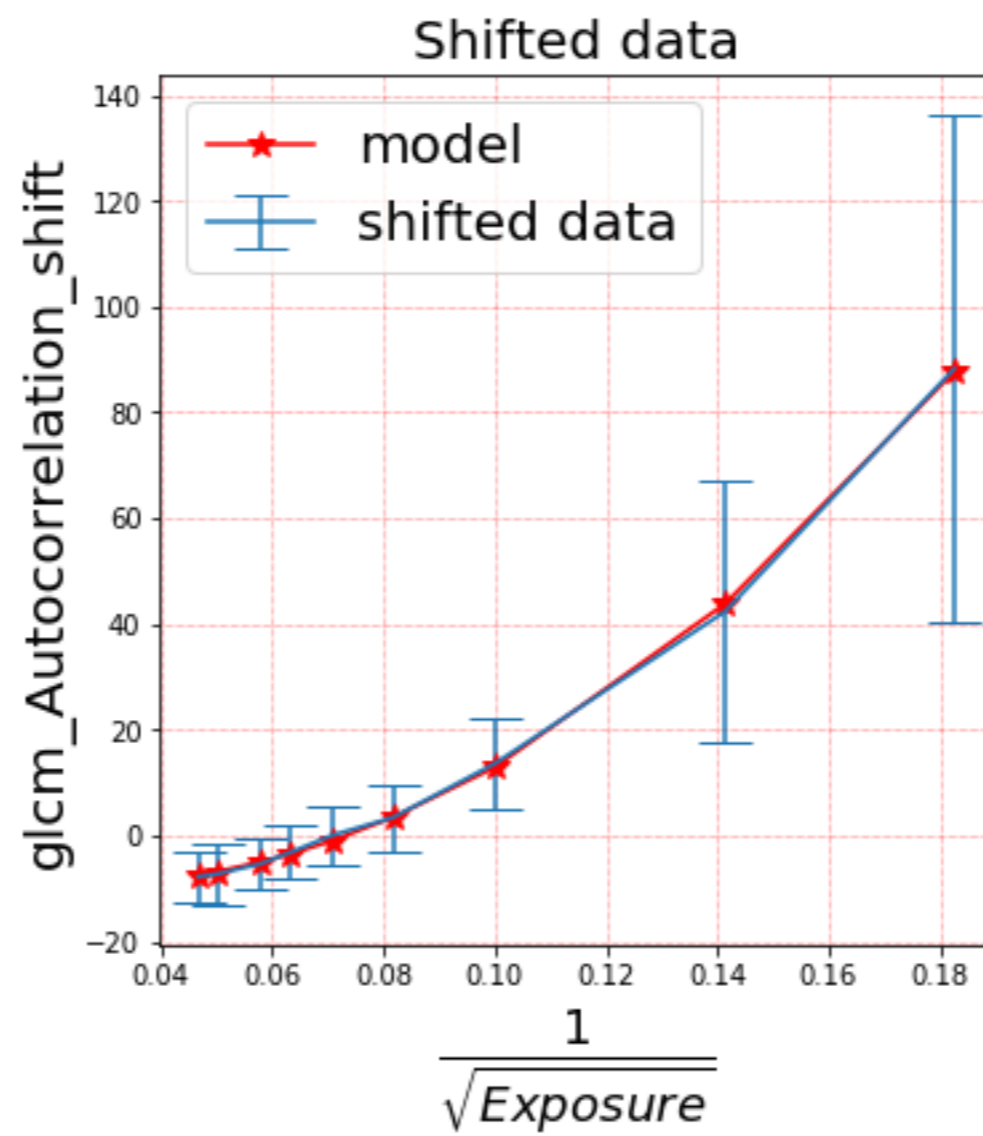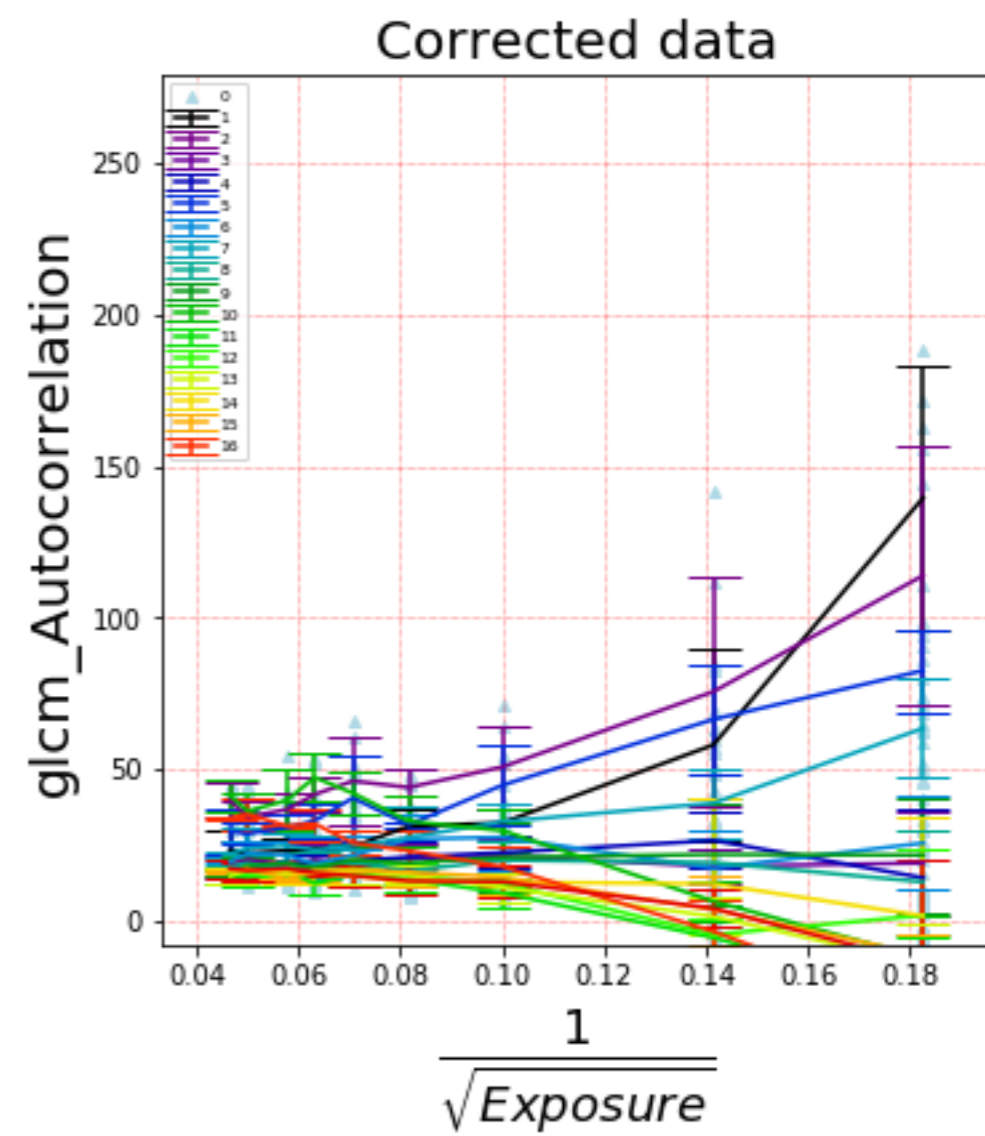

Original data

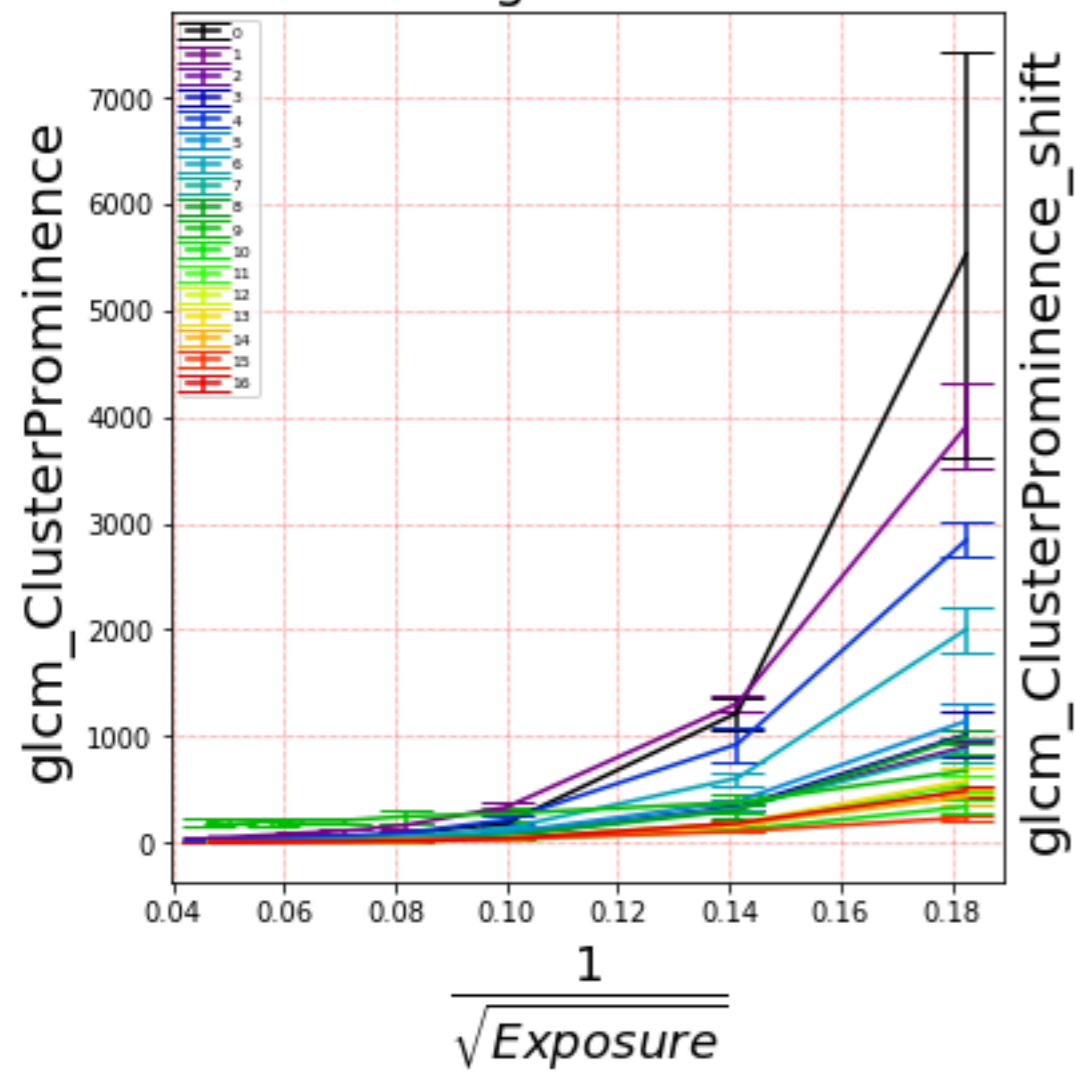

Shifted data

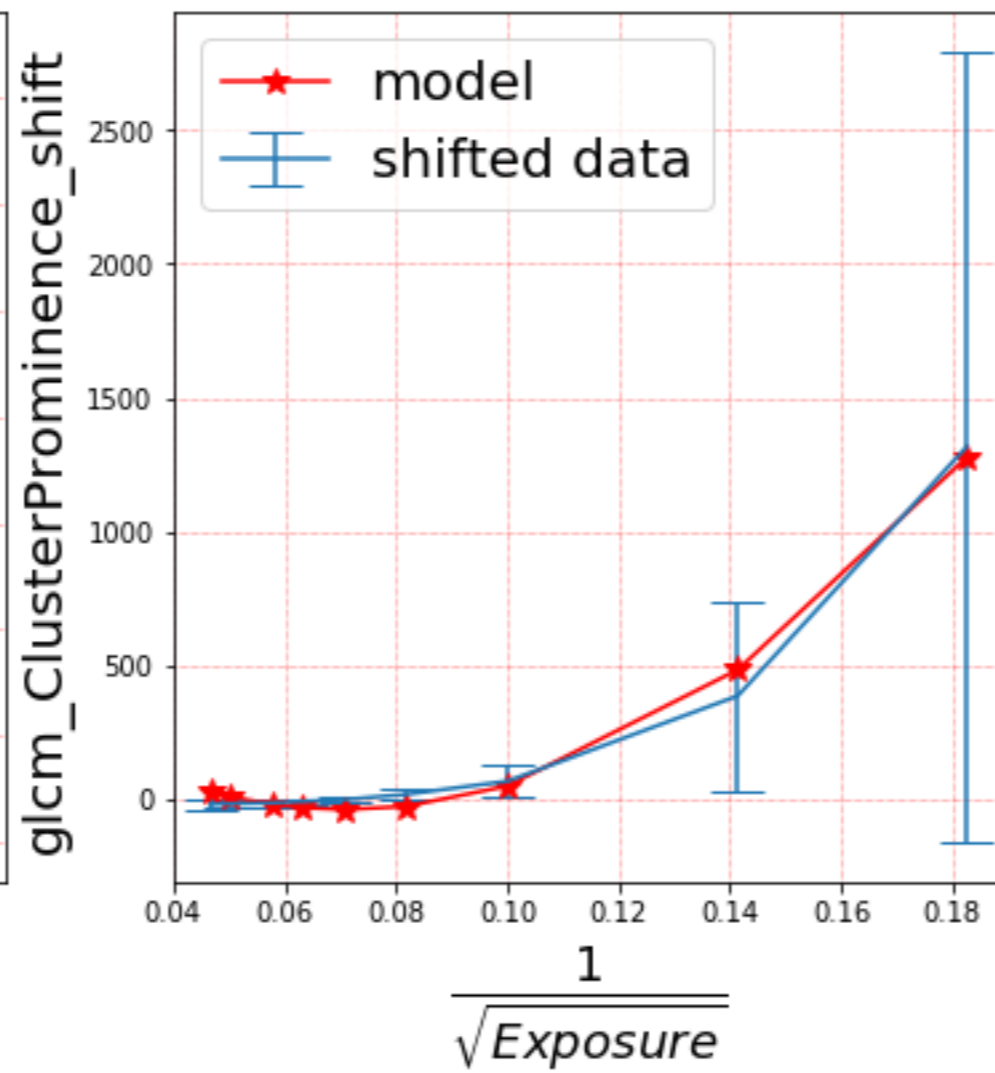

Corrected data

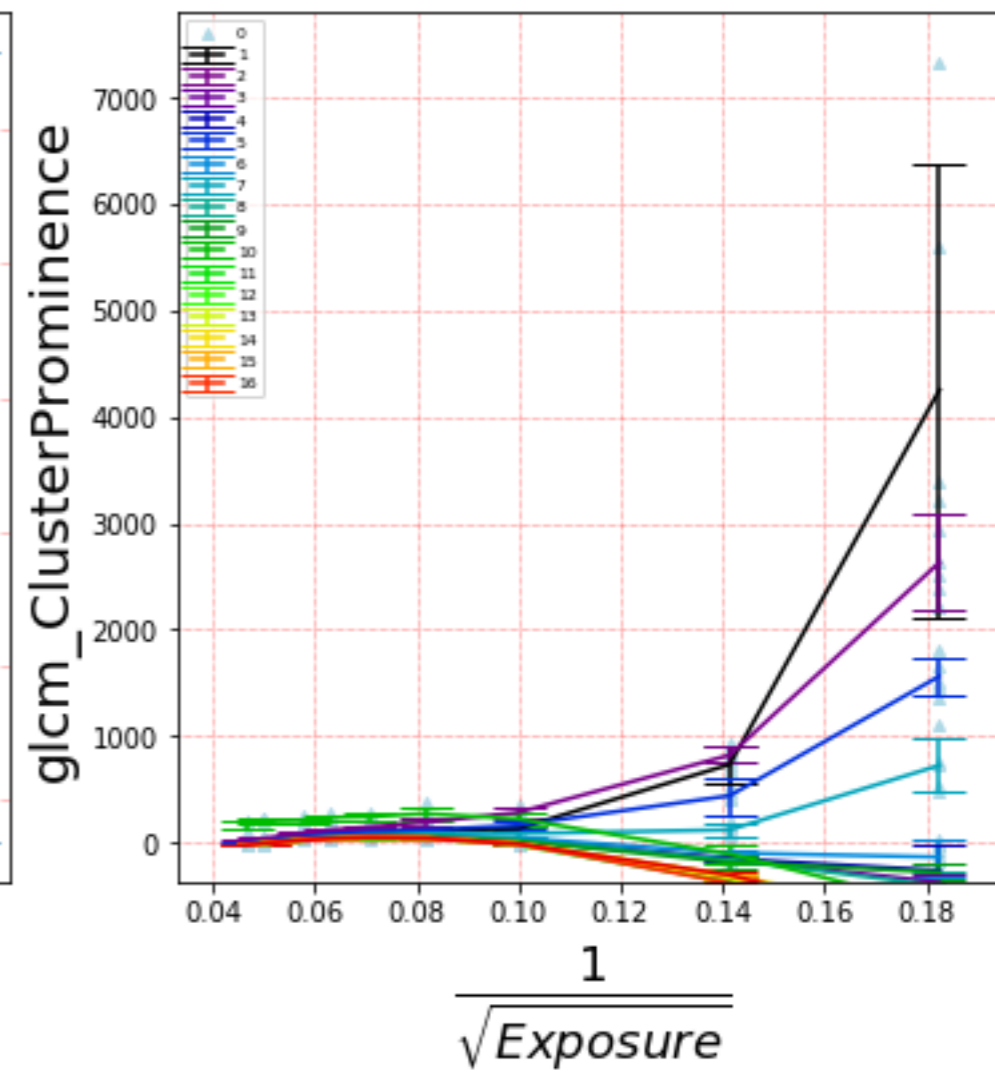



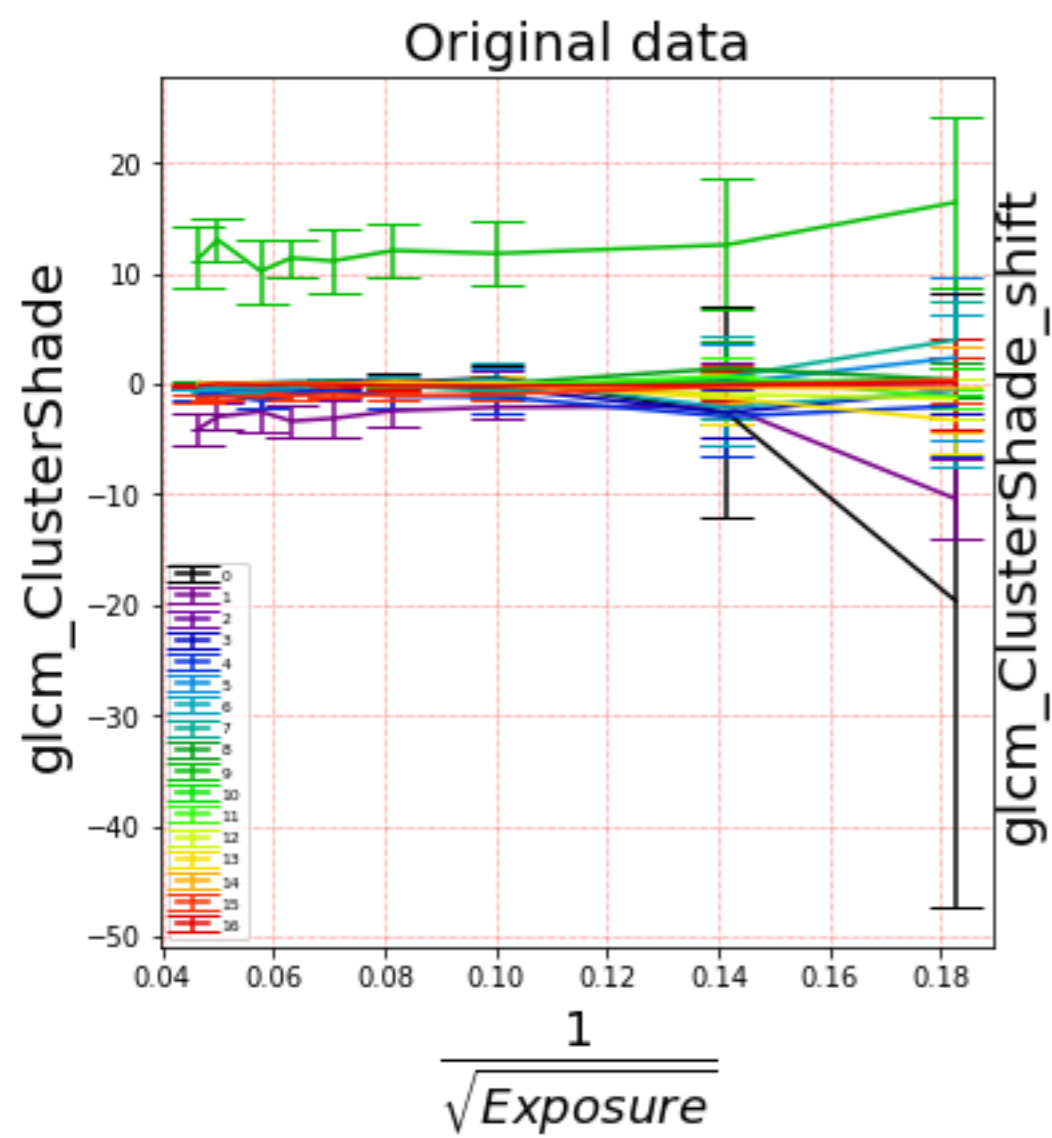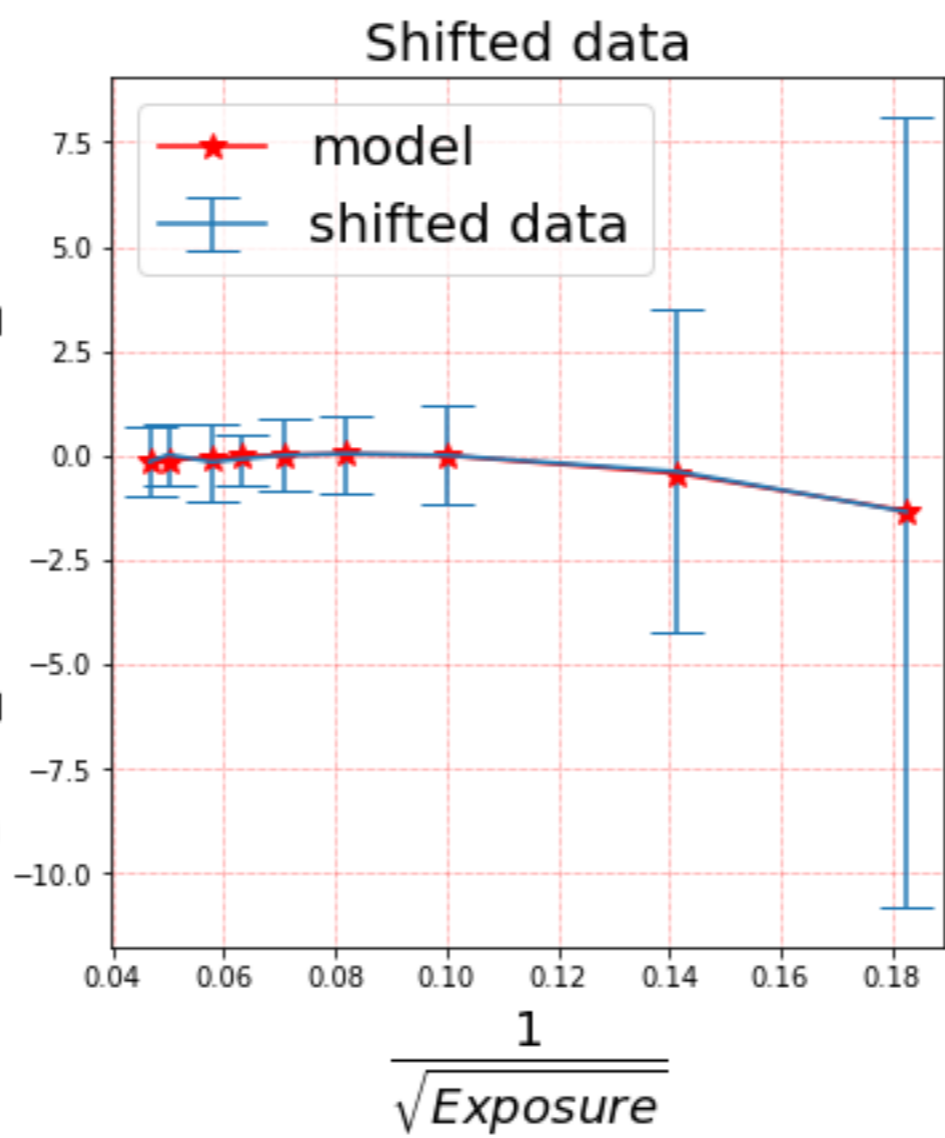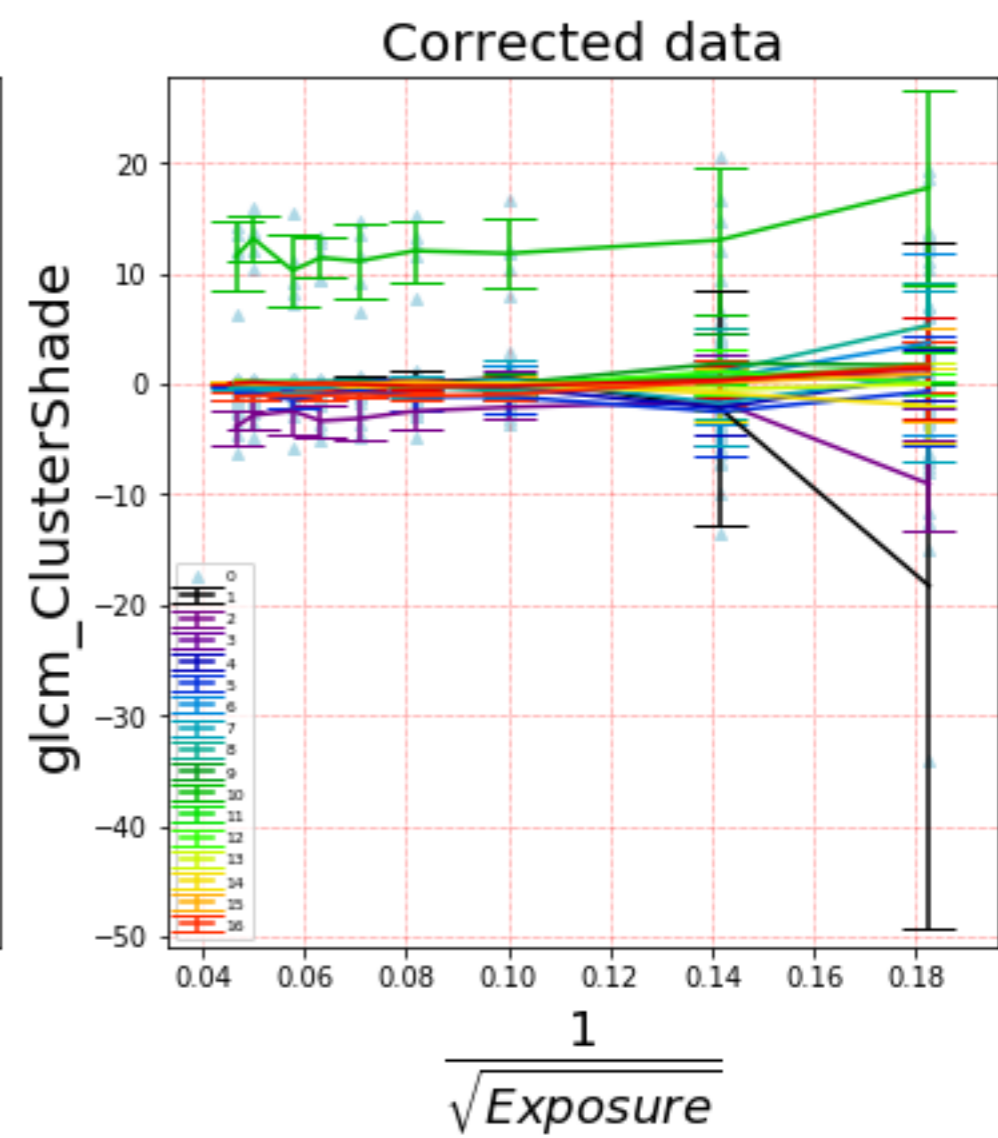

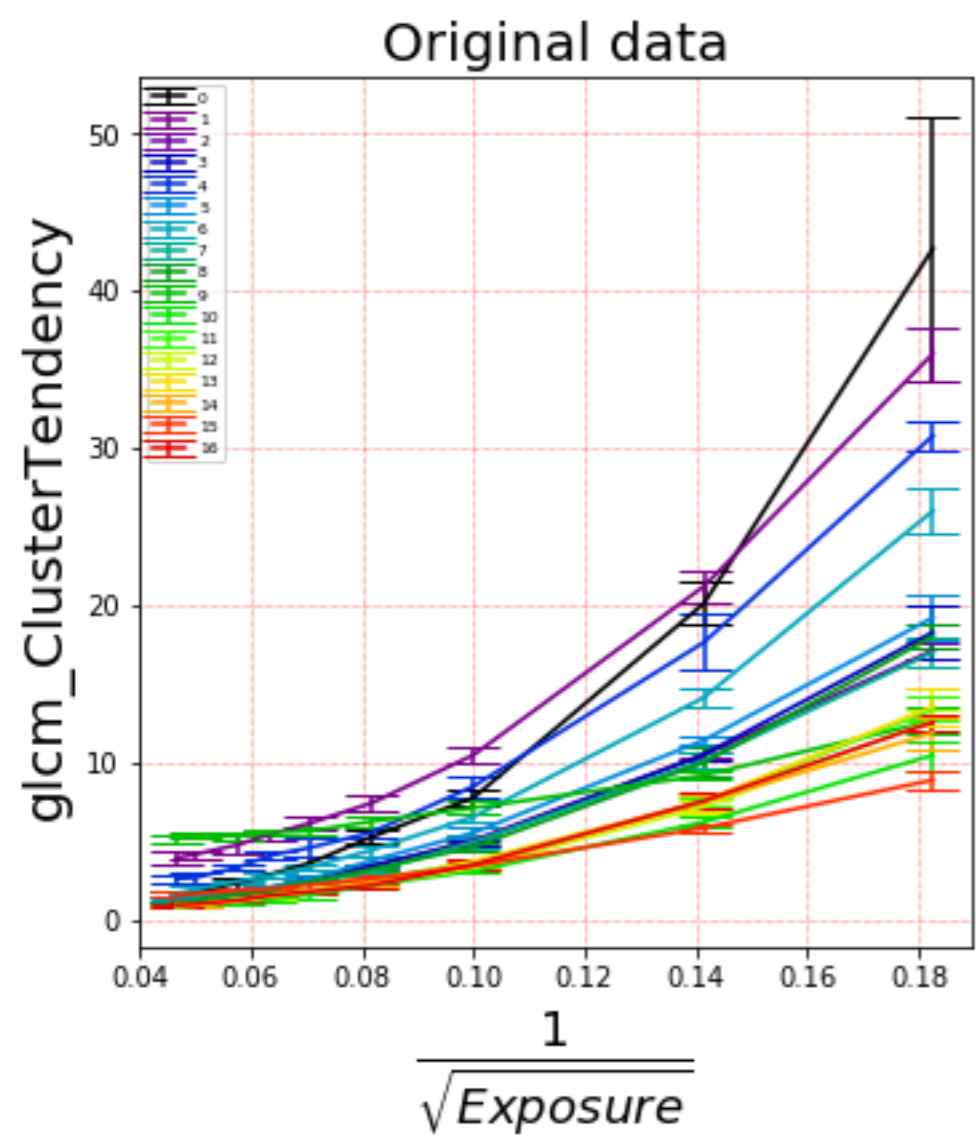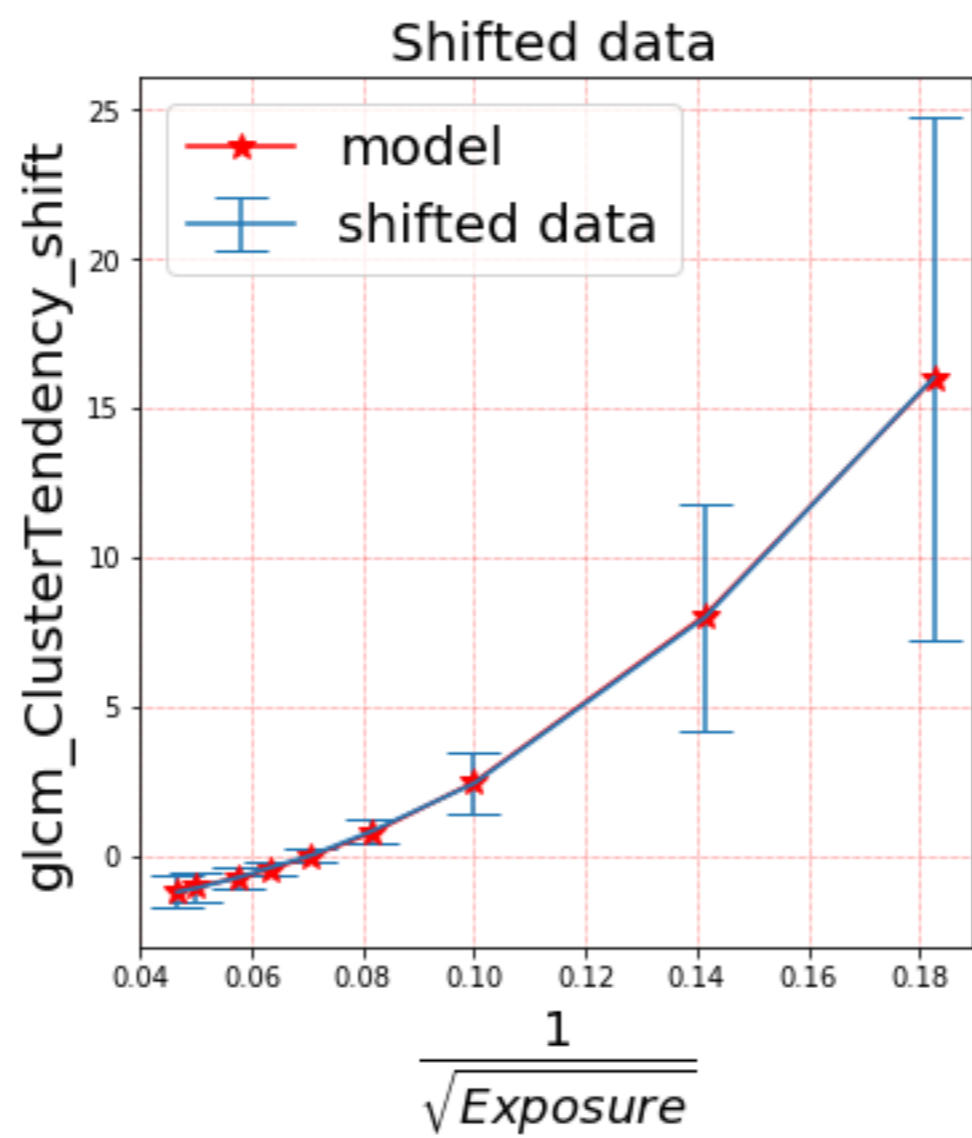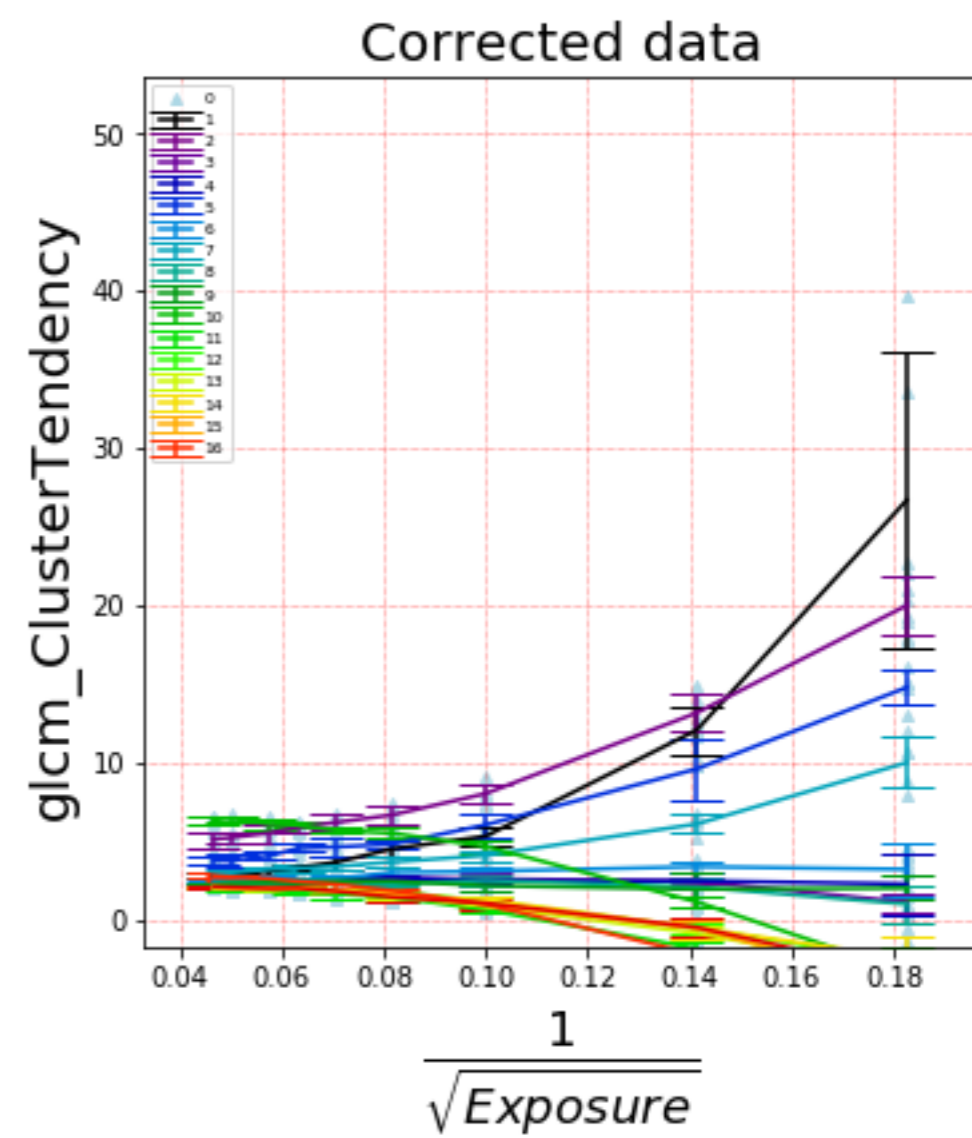

Original data

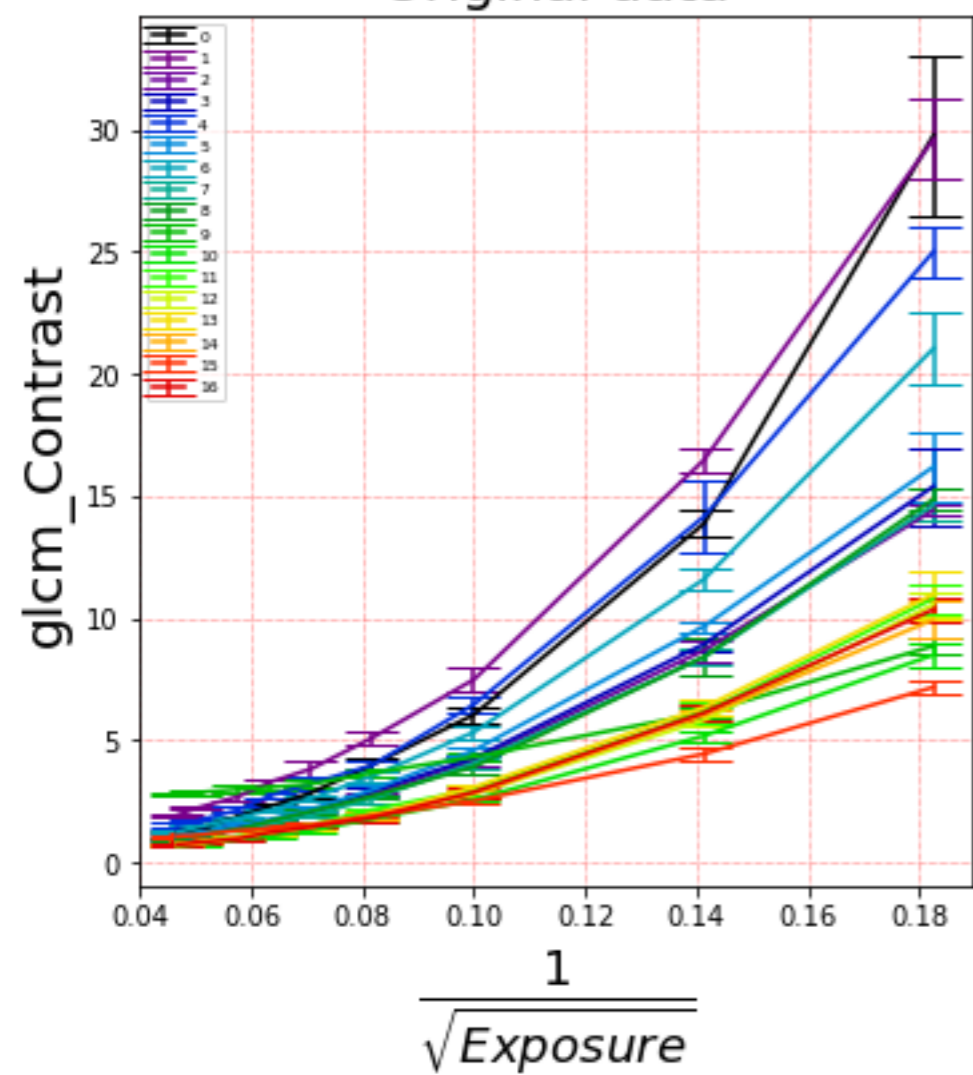

Shifted data

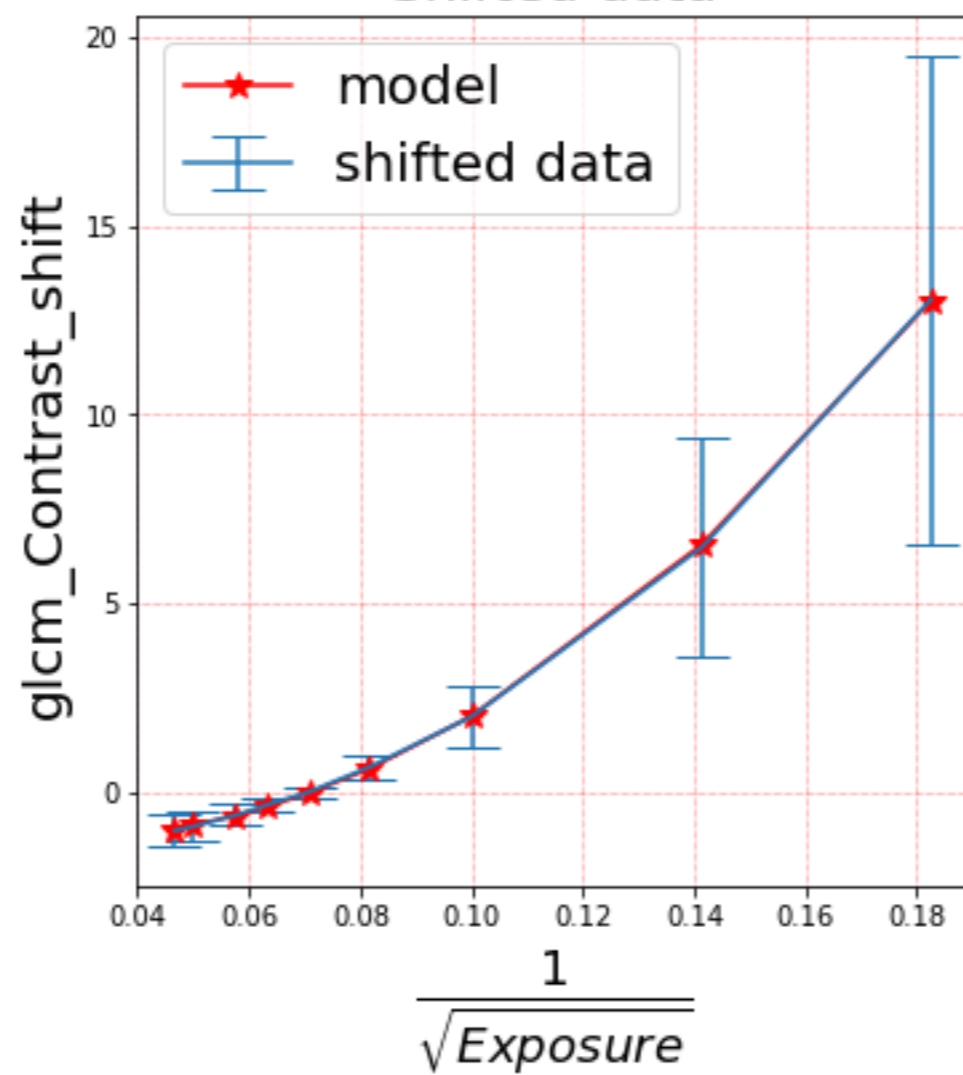

Corrected data

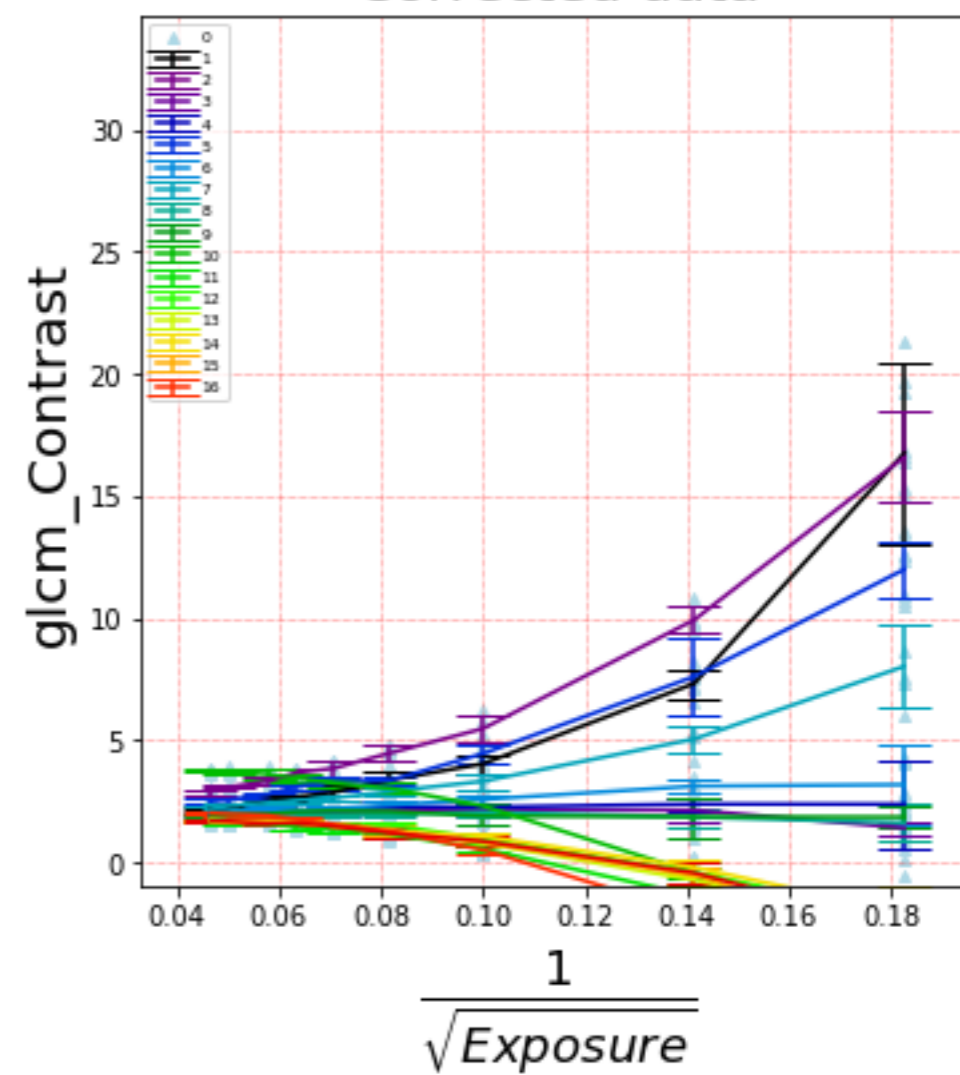

Original data

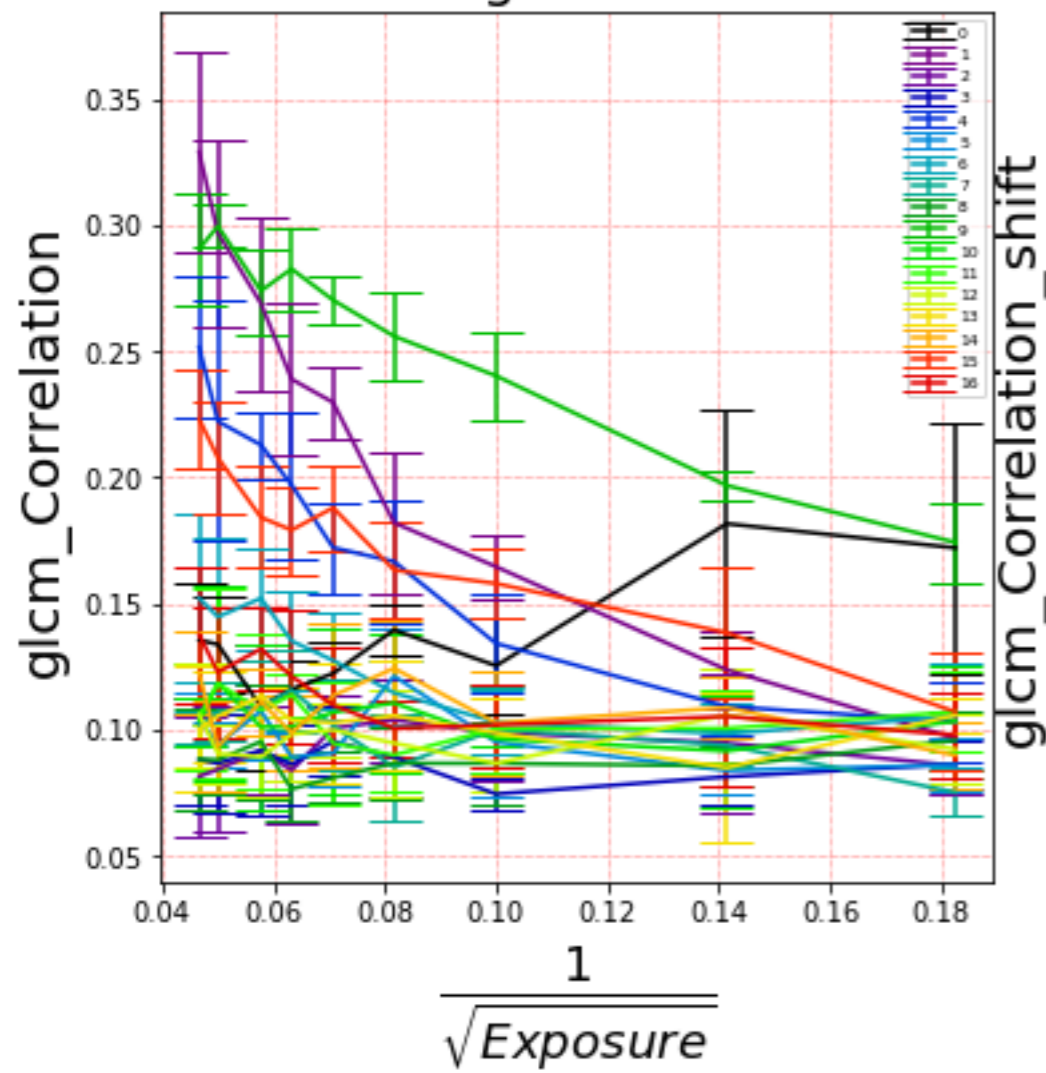

Shifted data

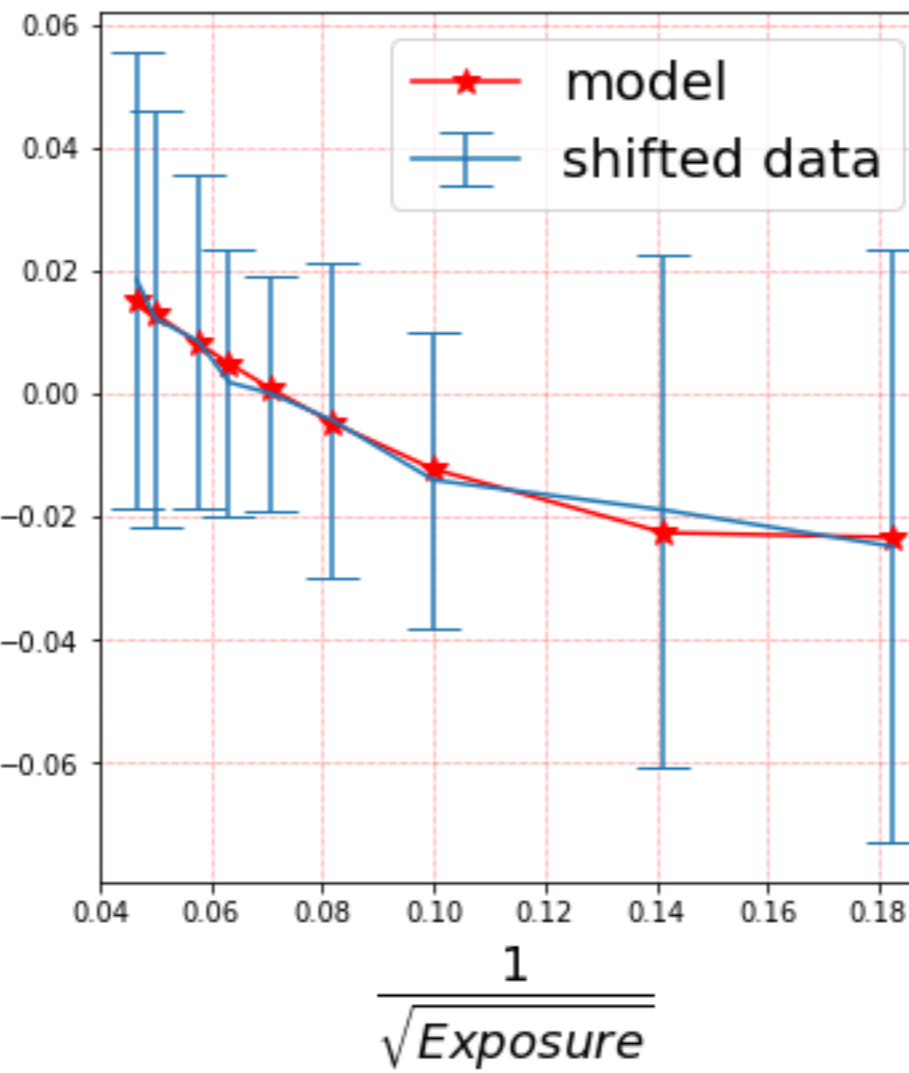

Corrected data

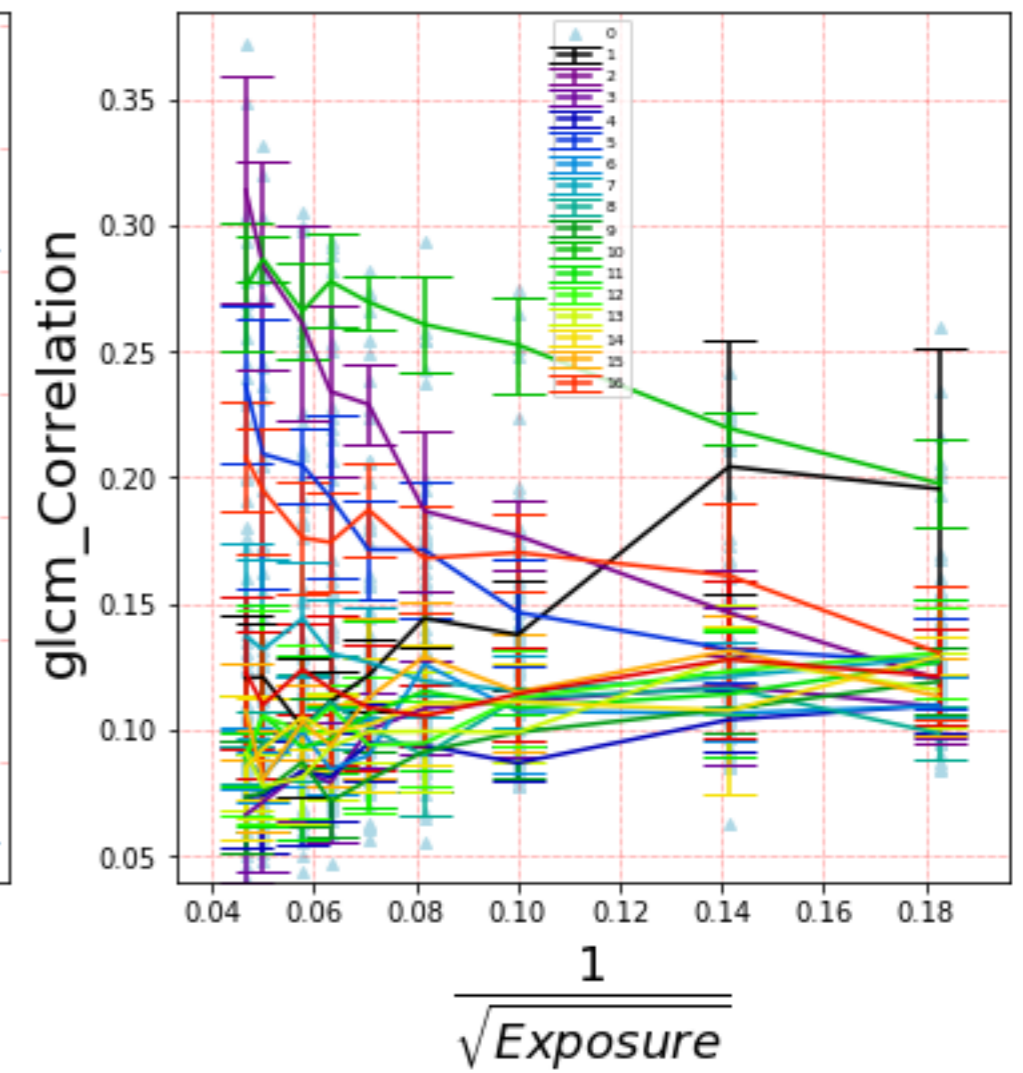



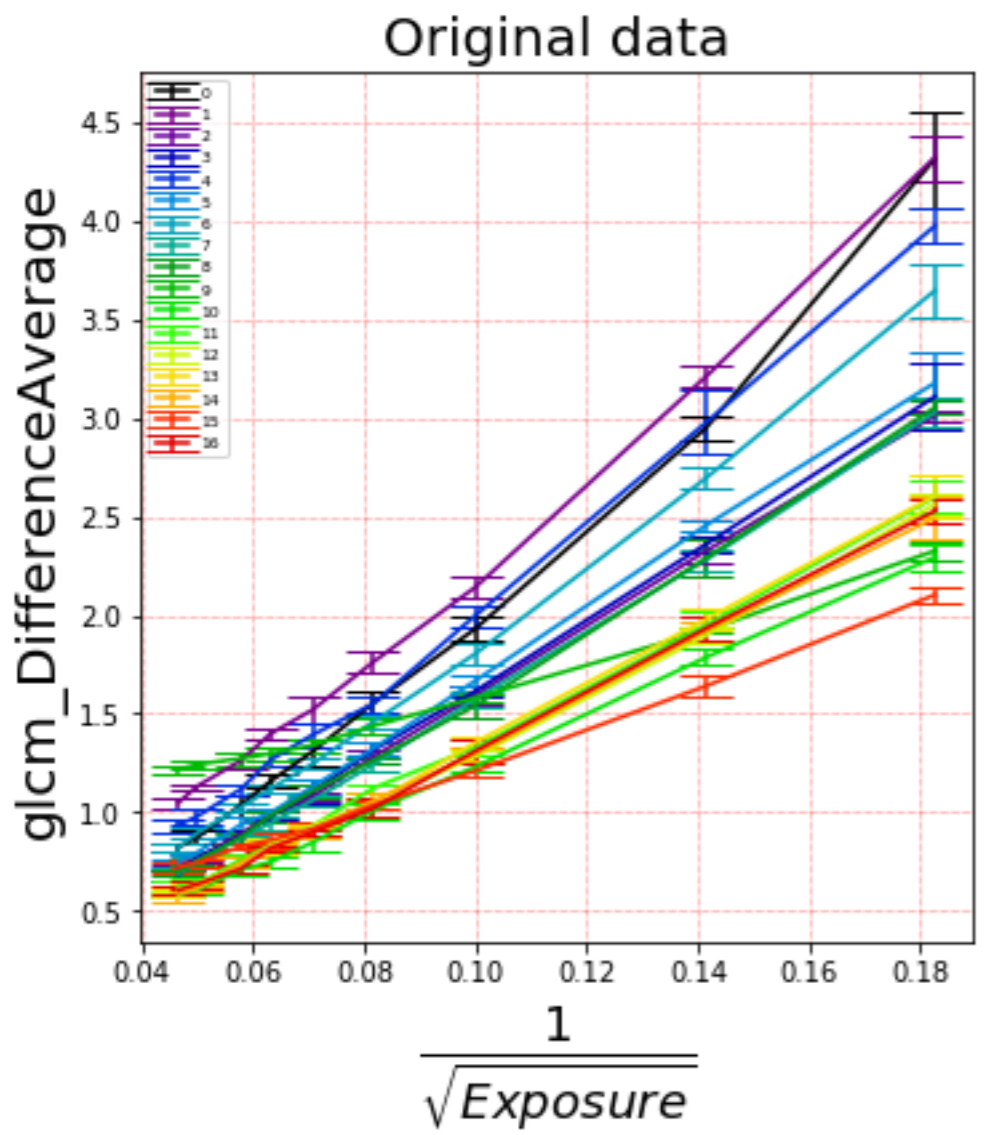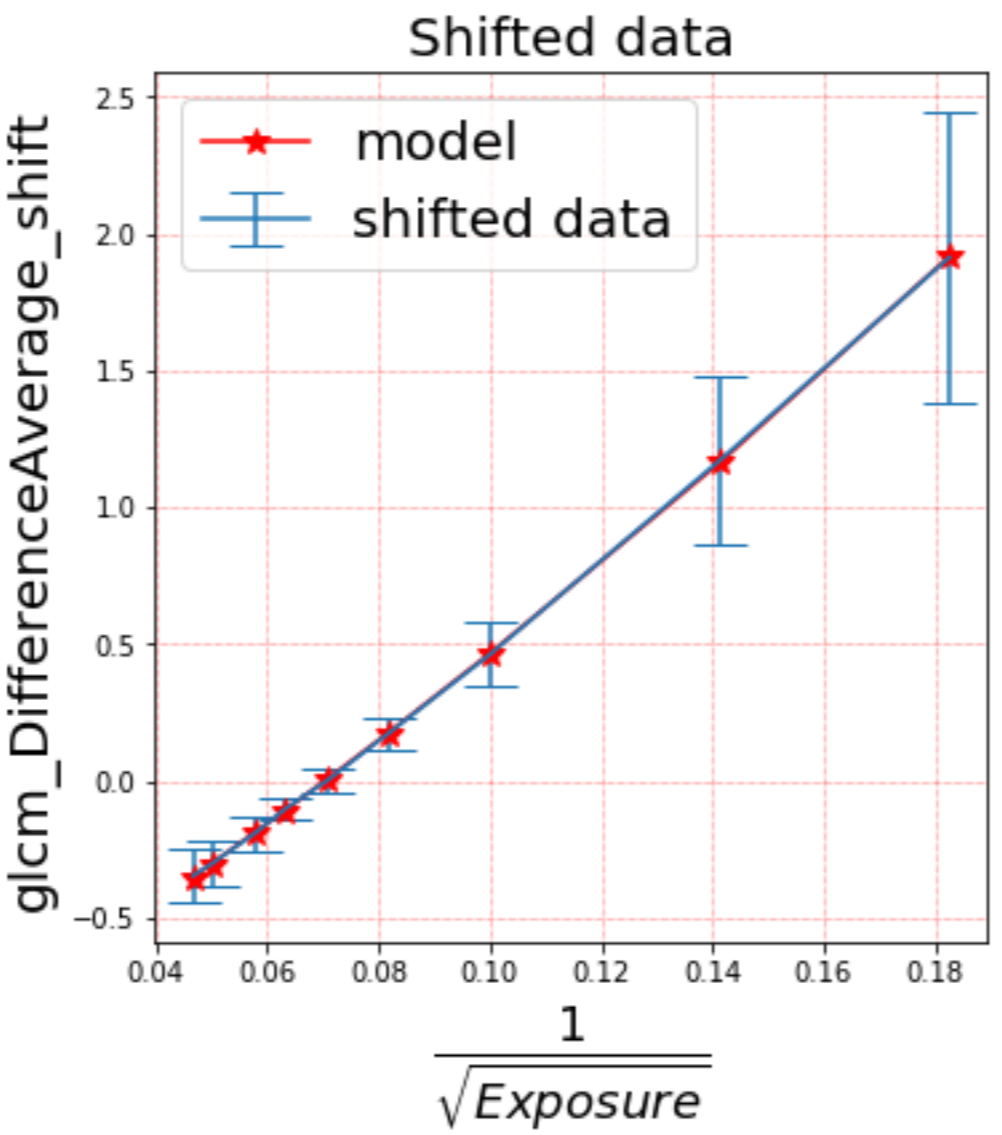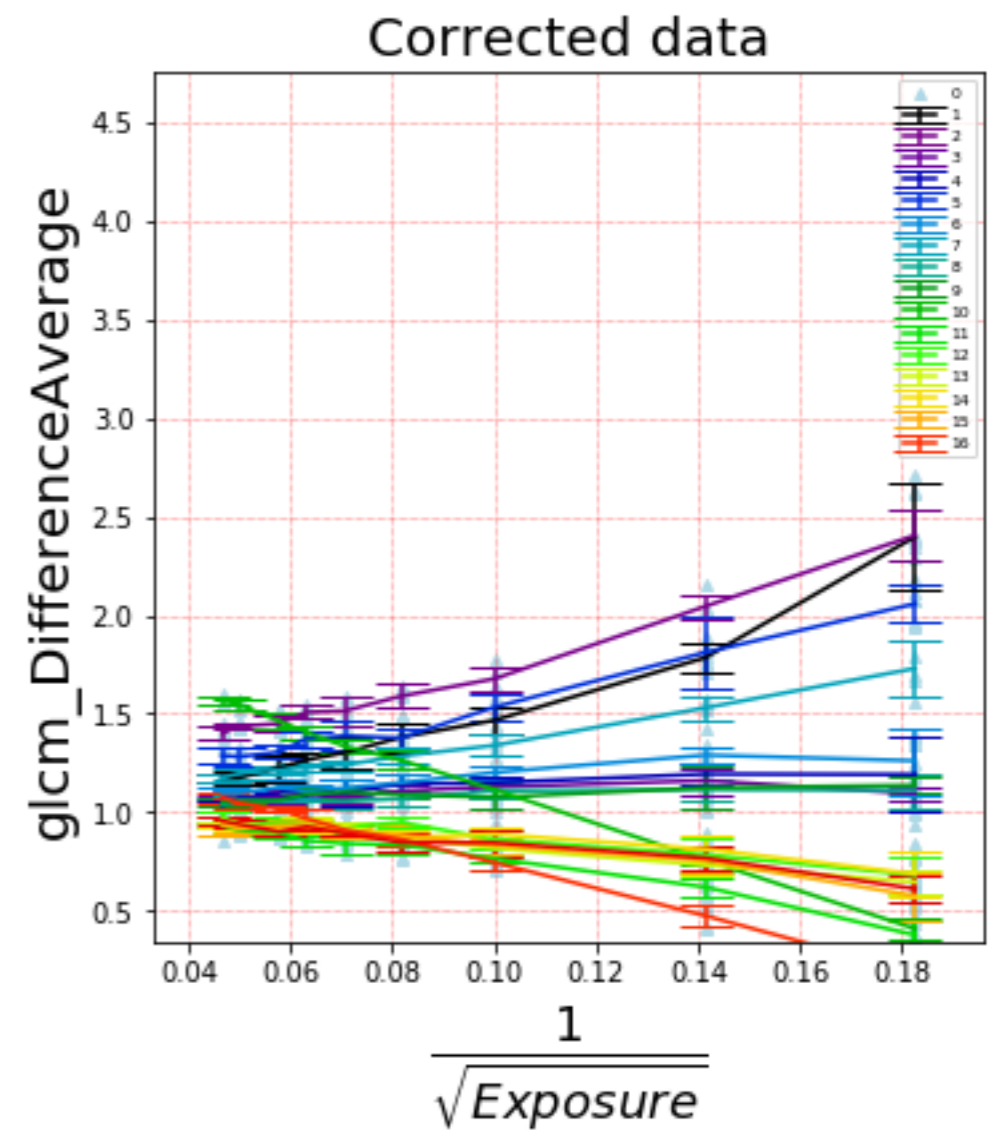

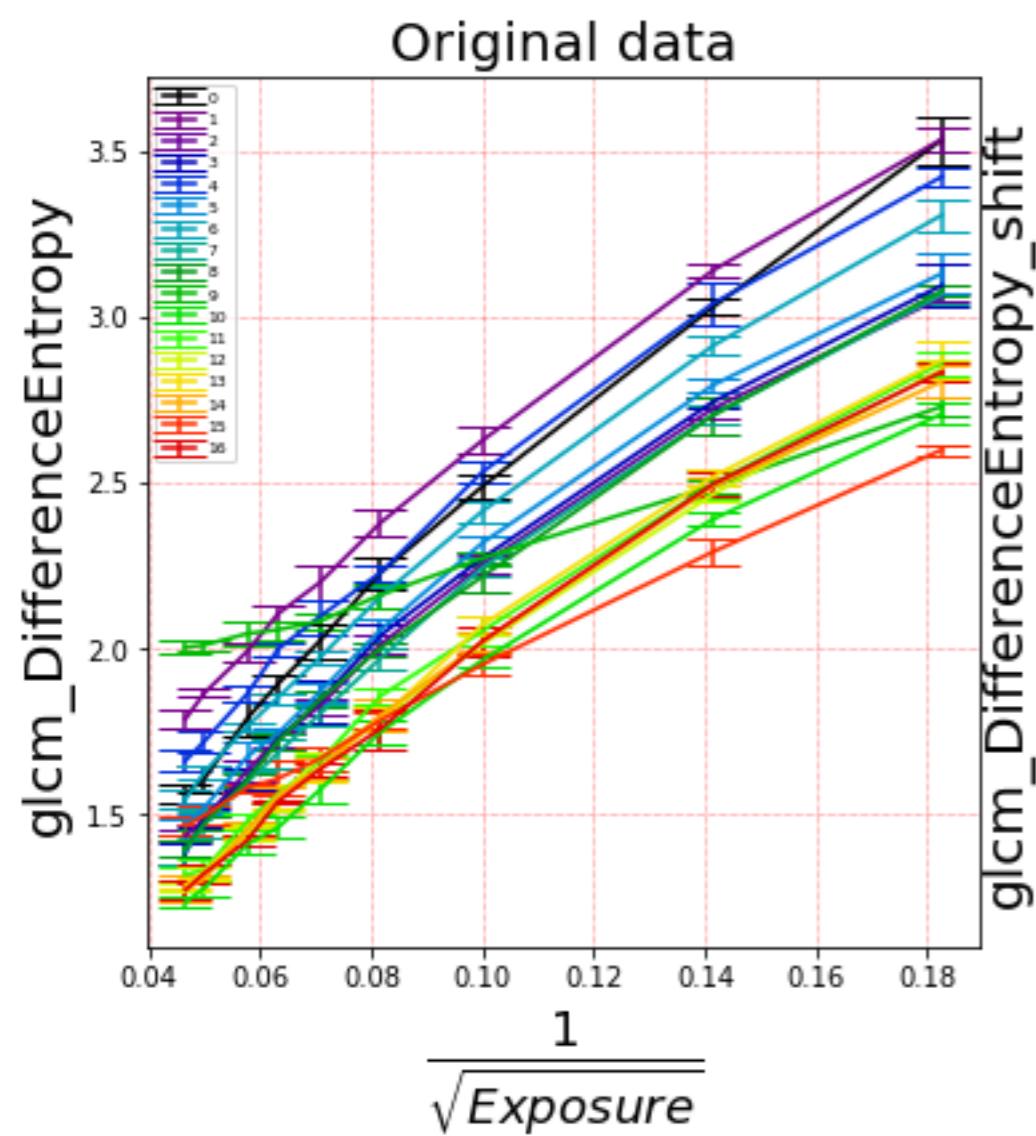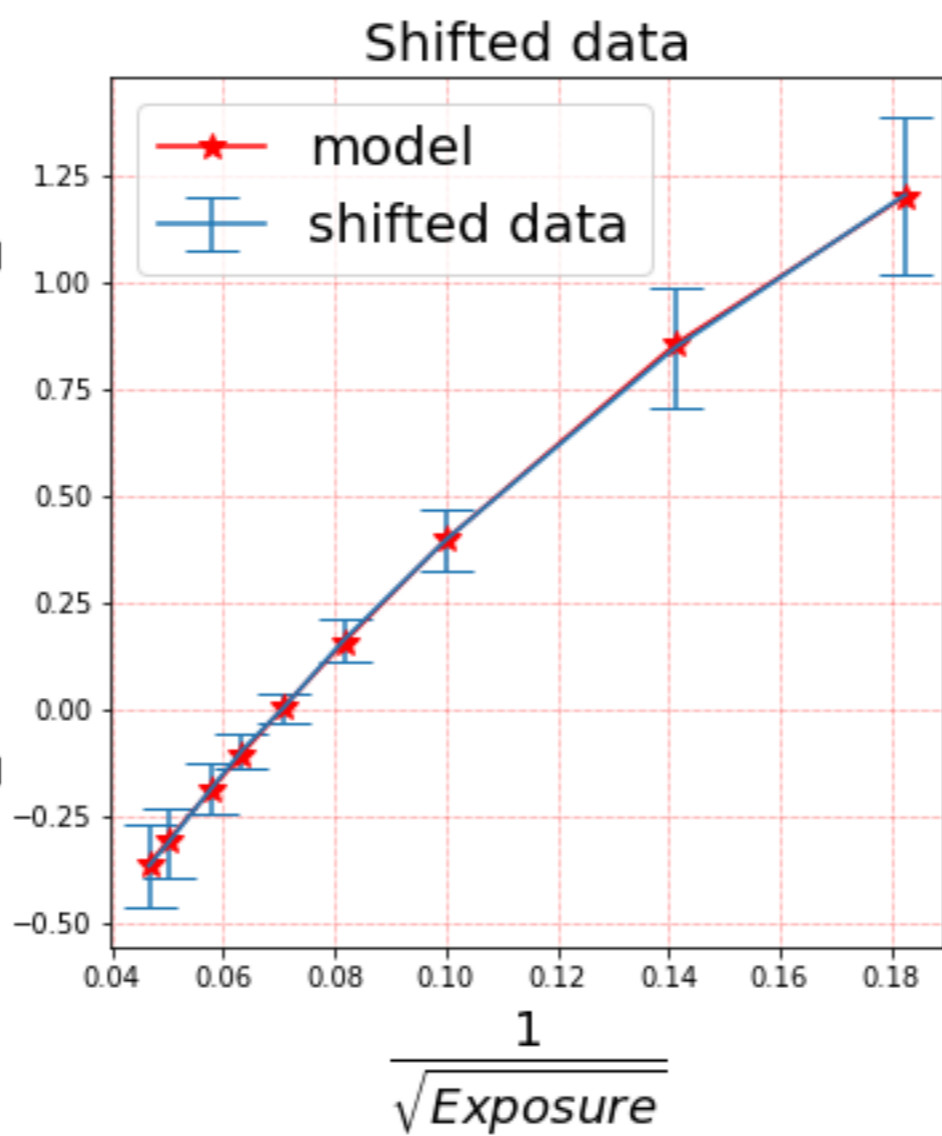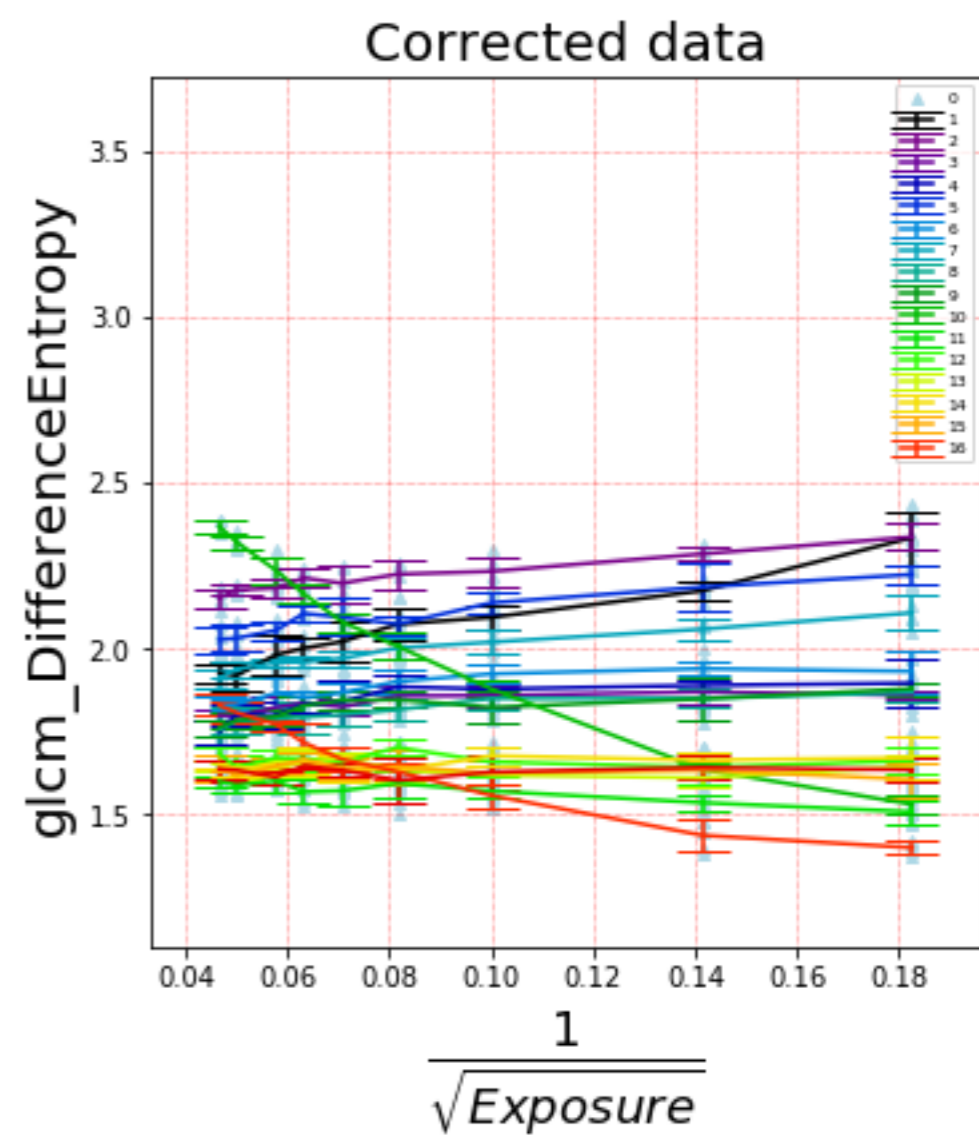

Original data

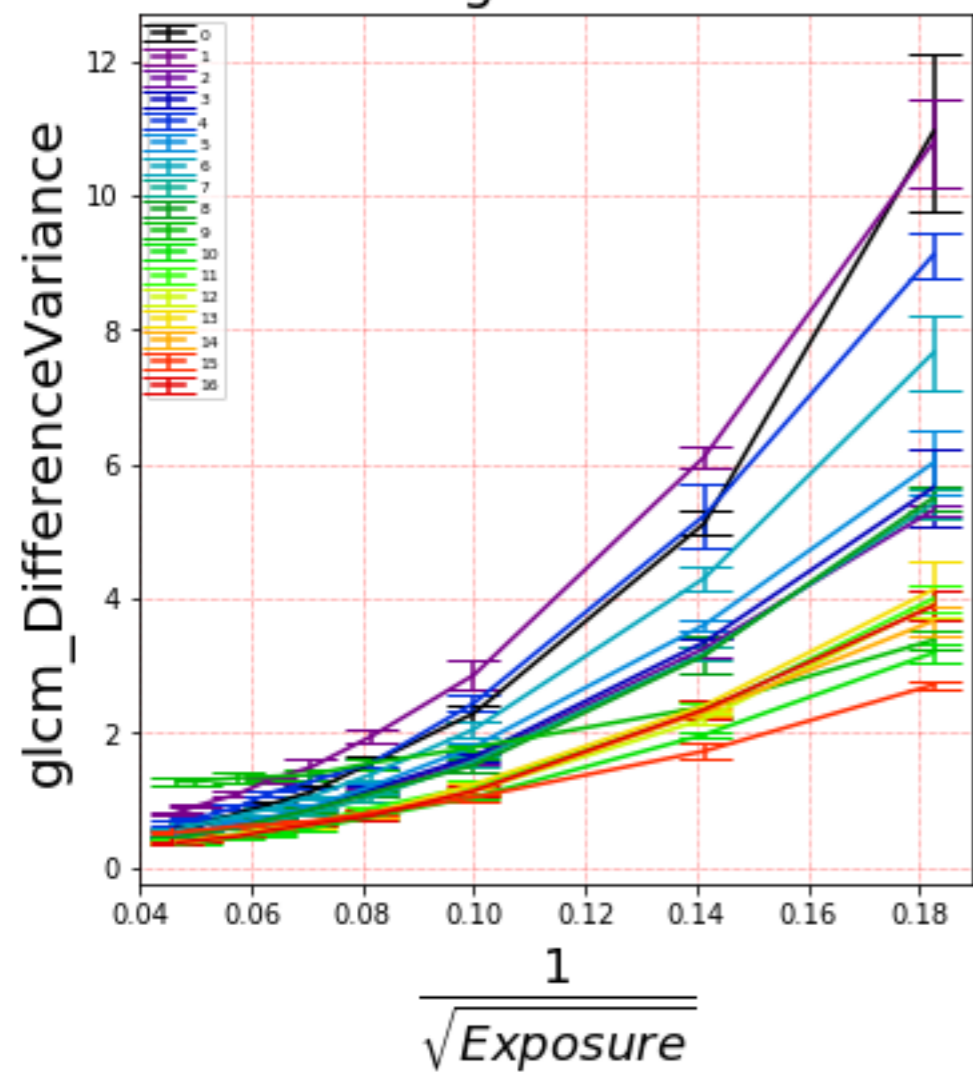

Shifted data

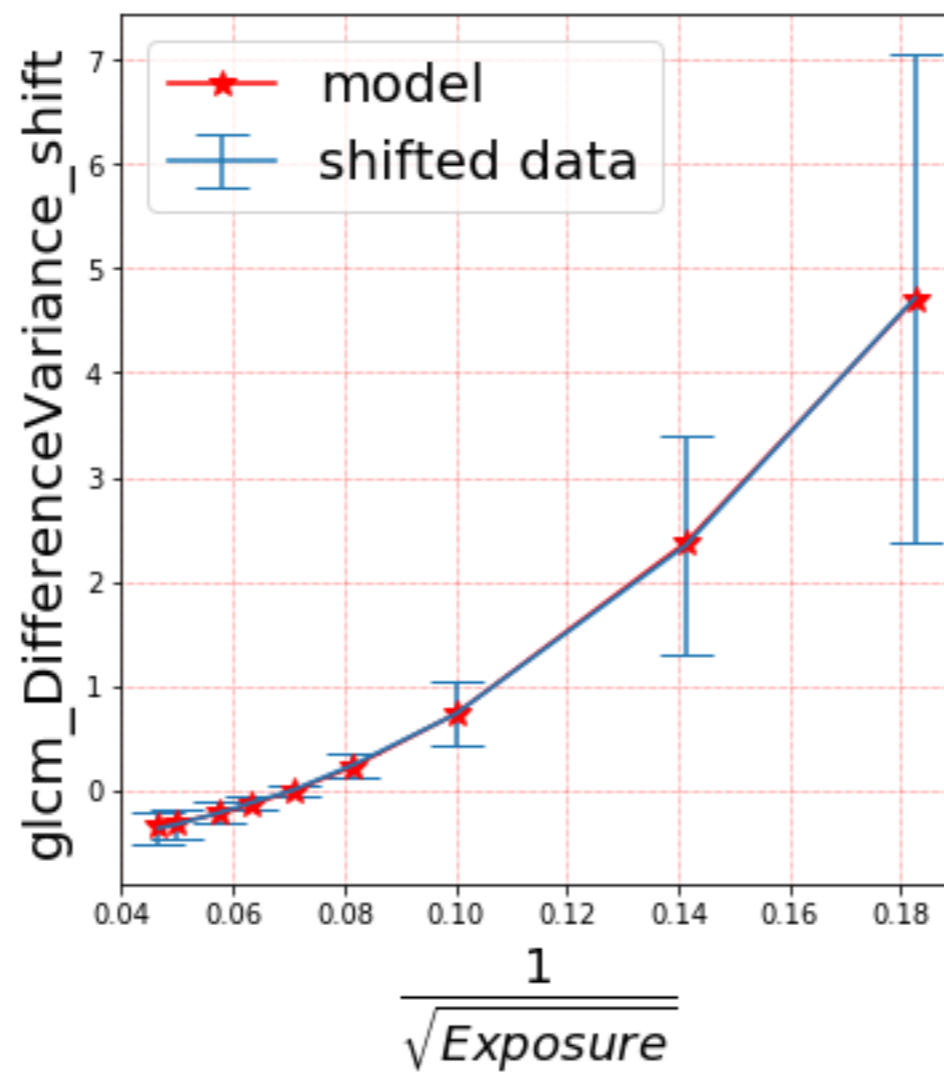

Corrected data

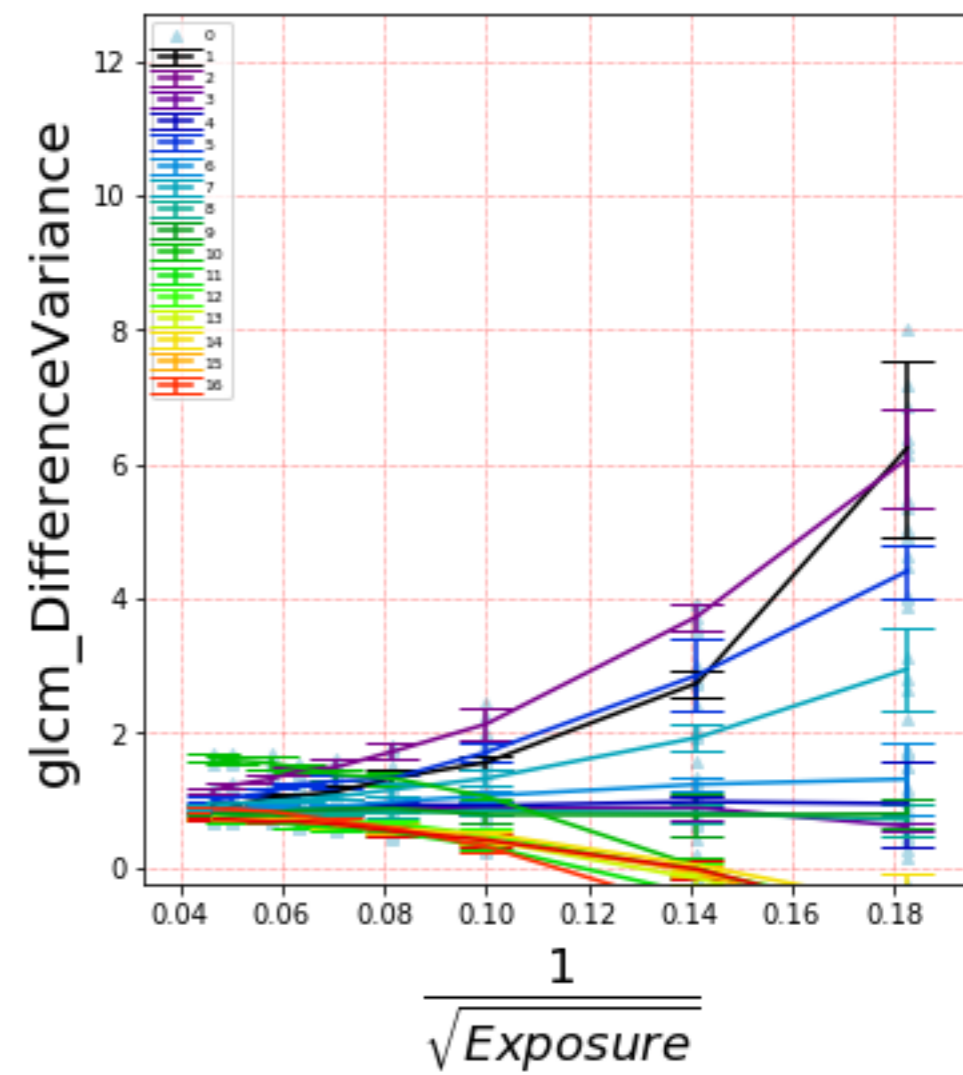

Original data

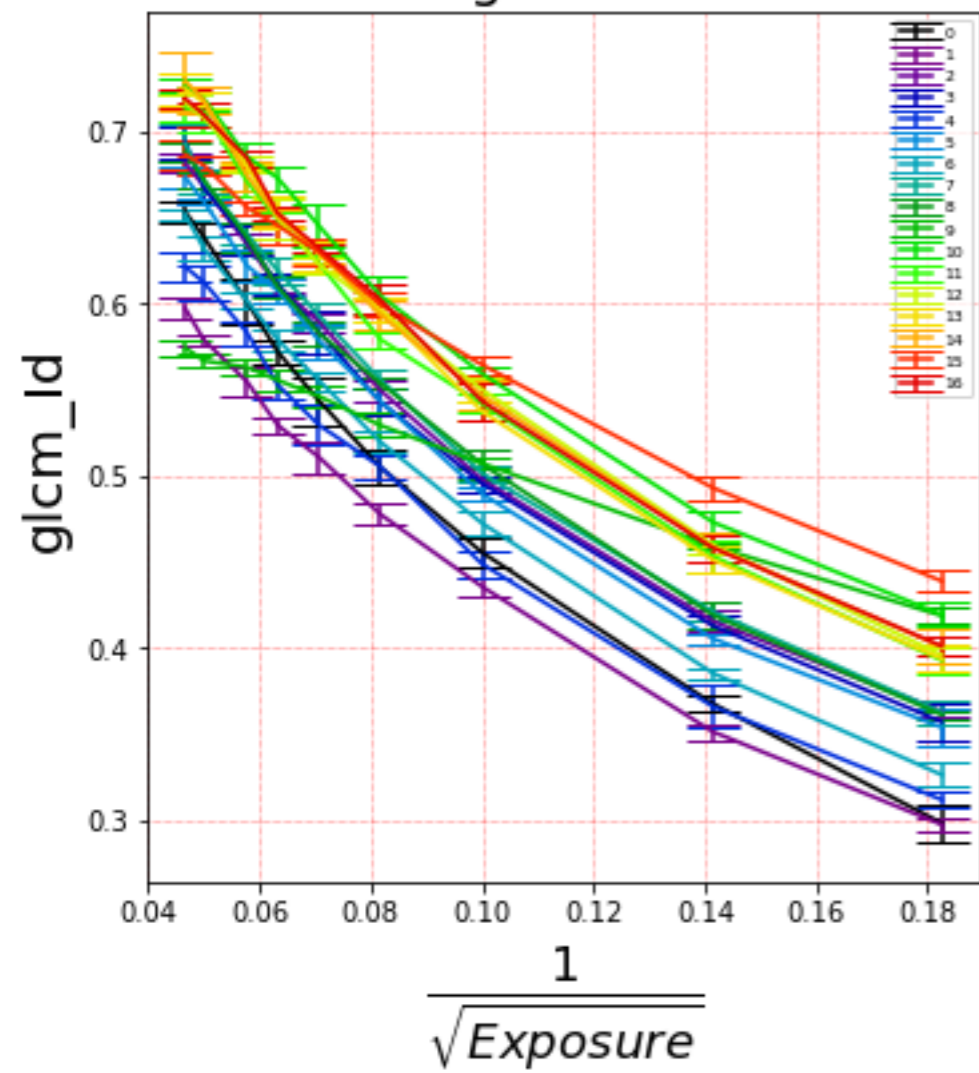

Shifted data

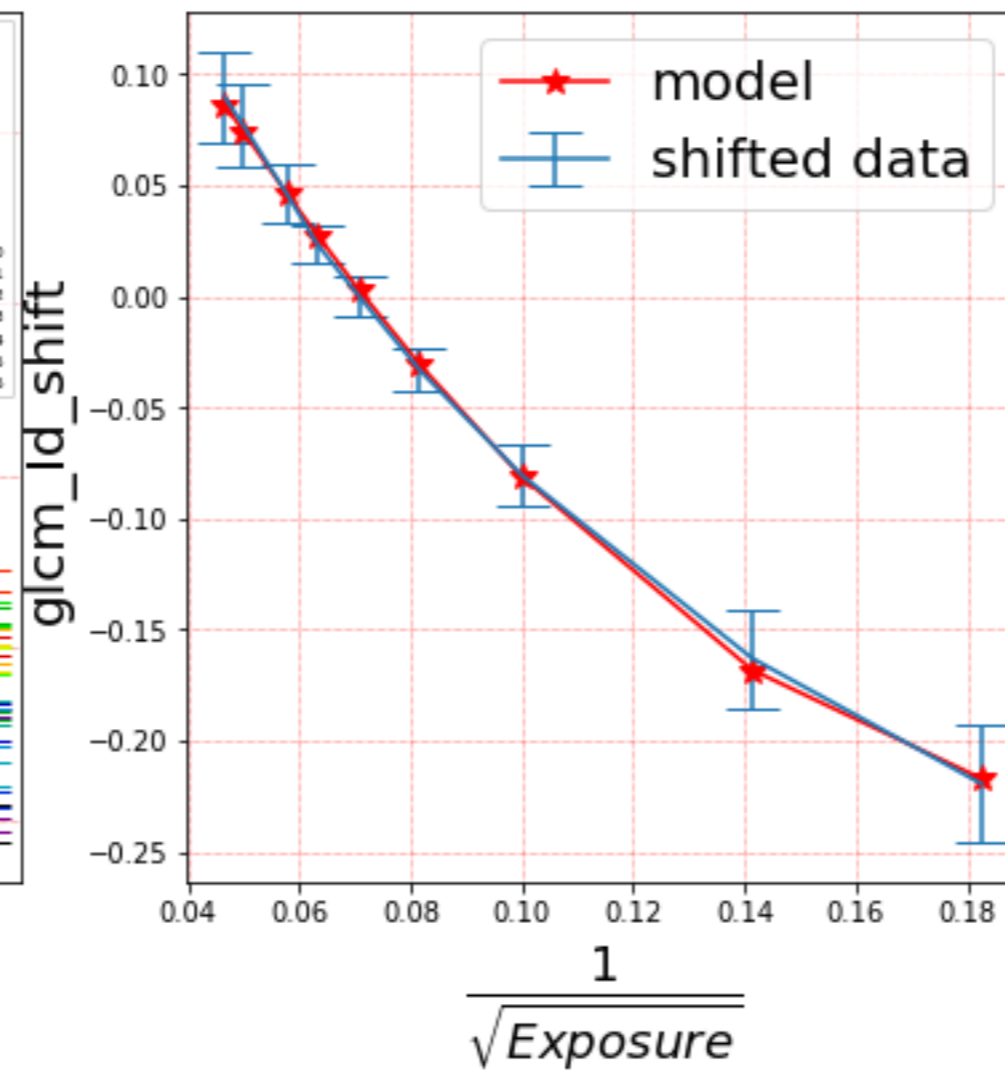

Corrected data

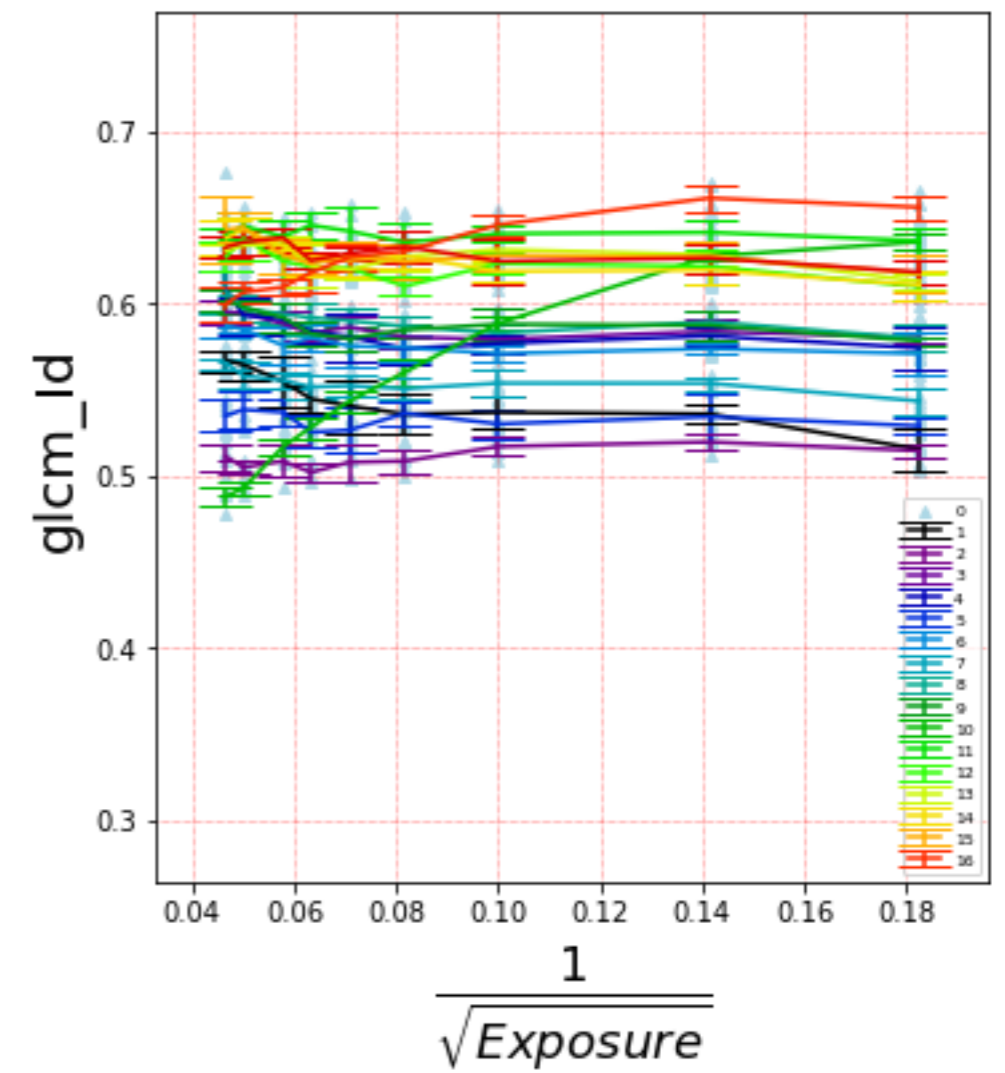



Original data

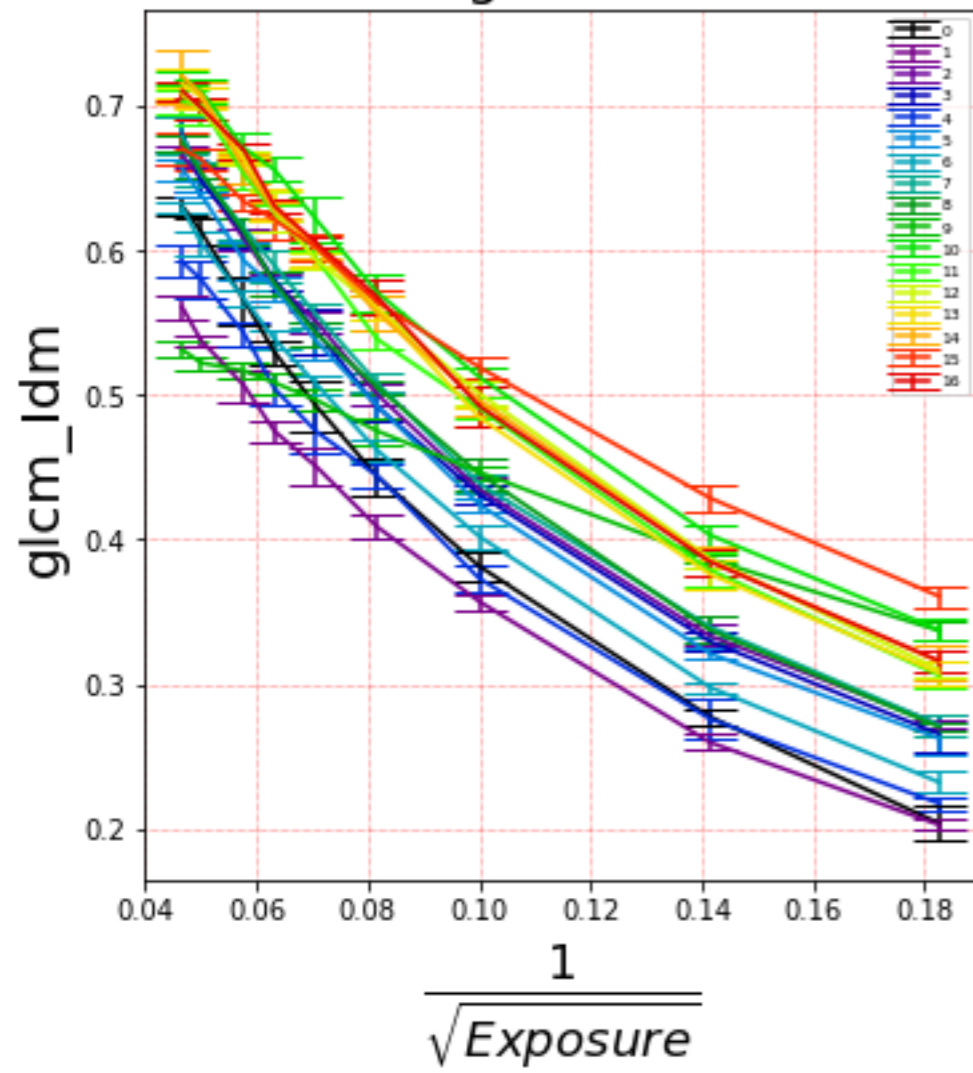

Shifted data

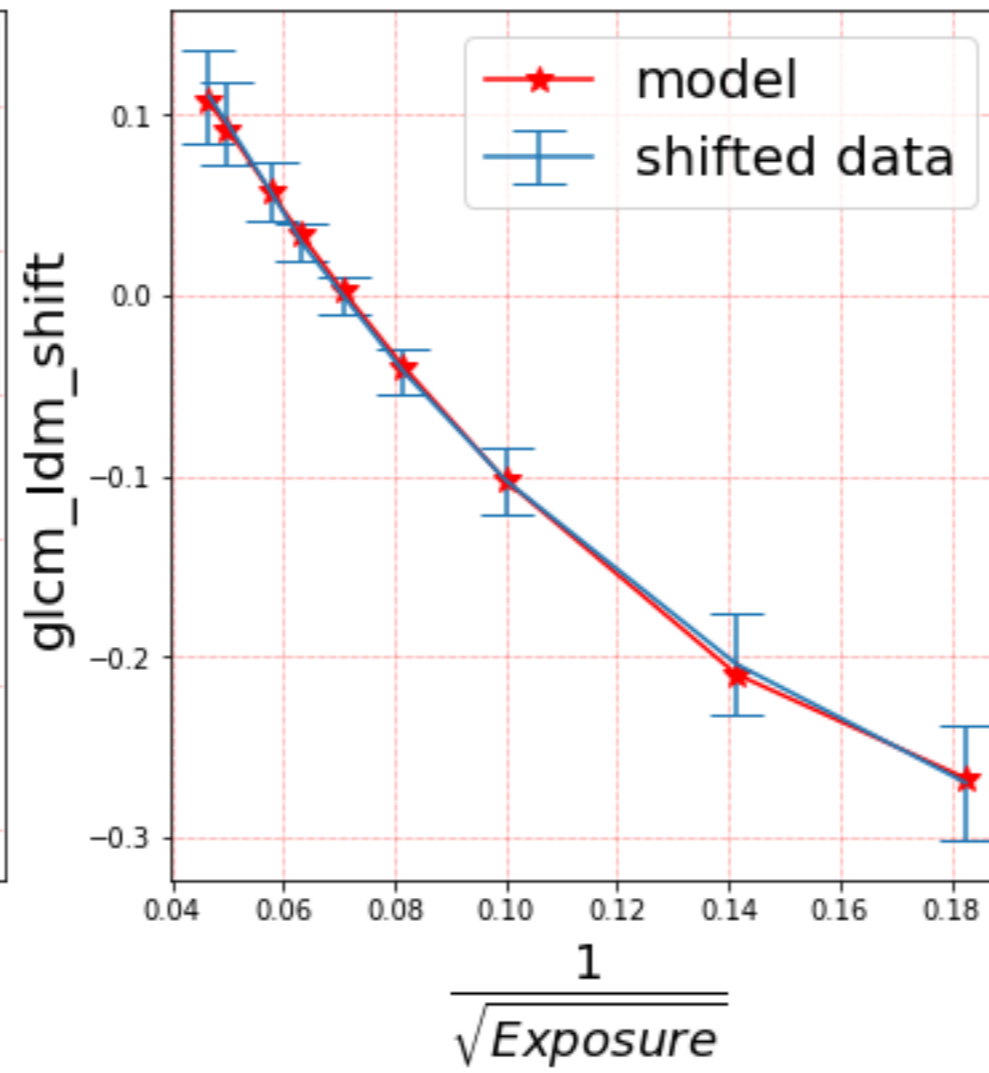

Corrected data

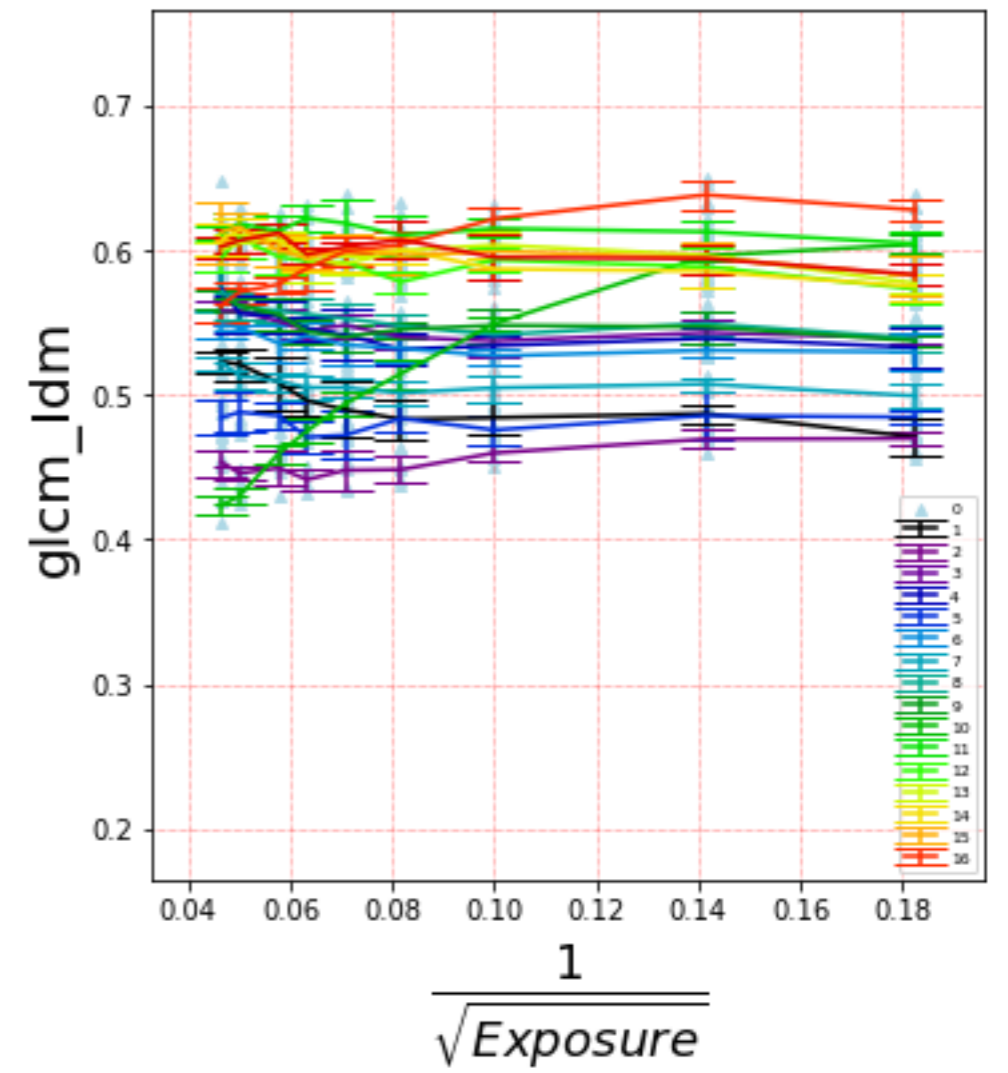

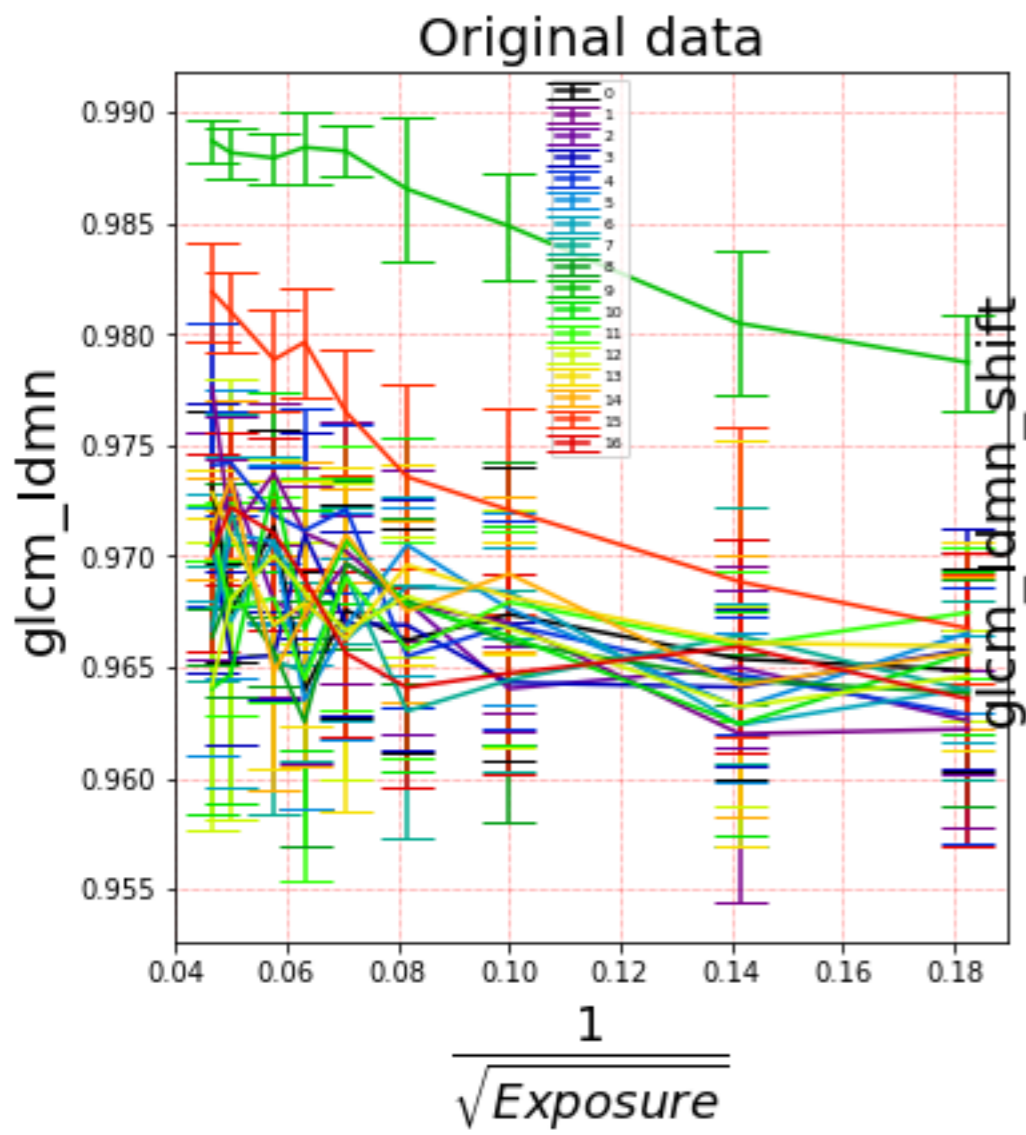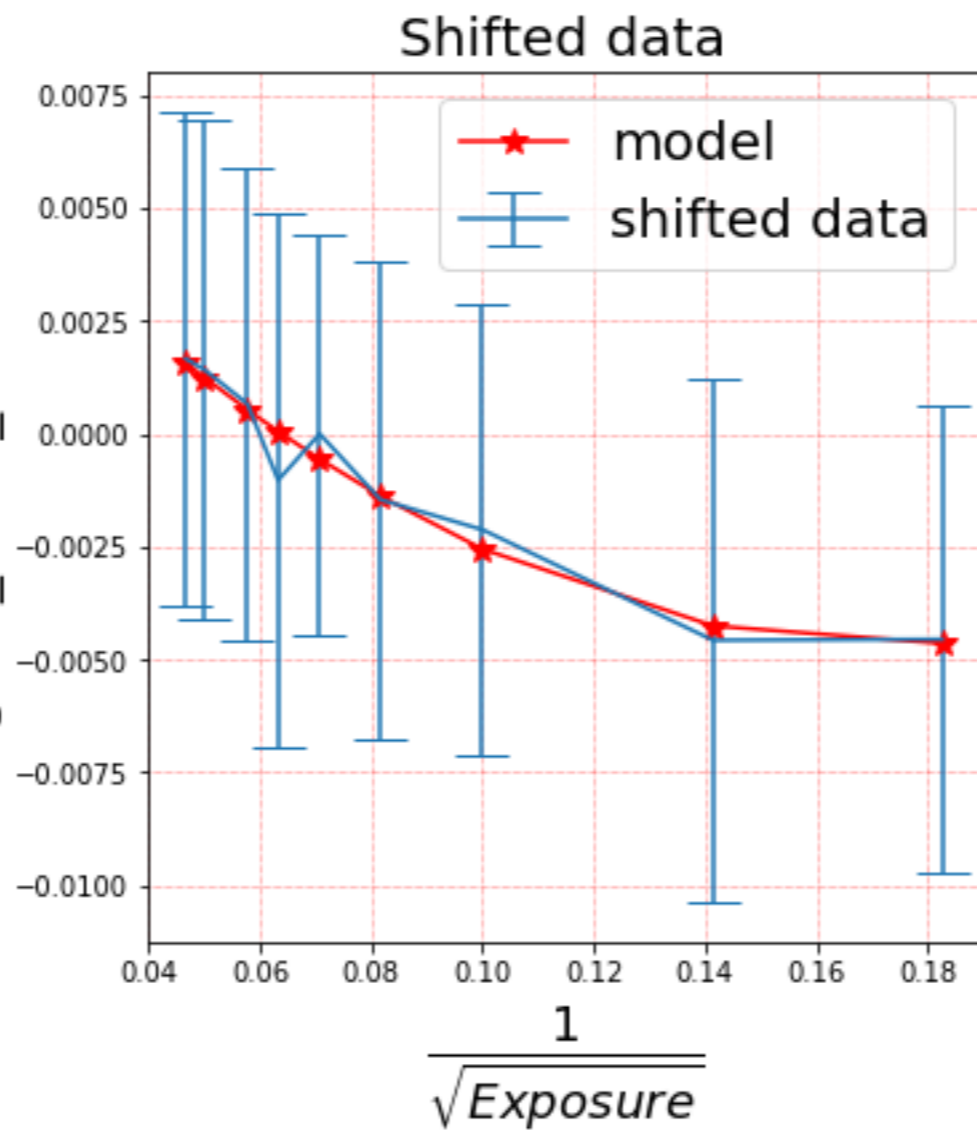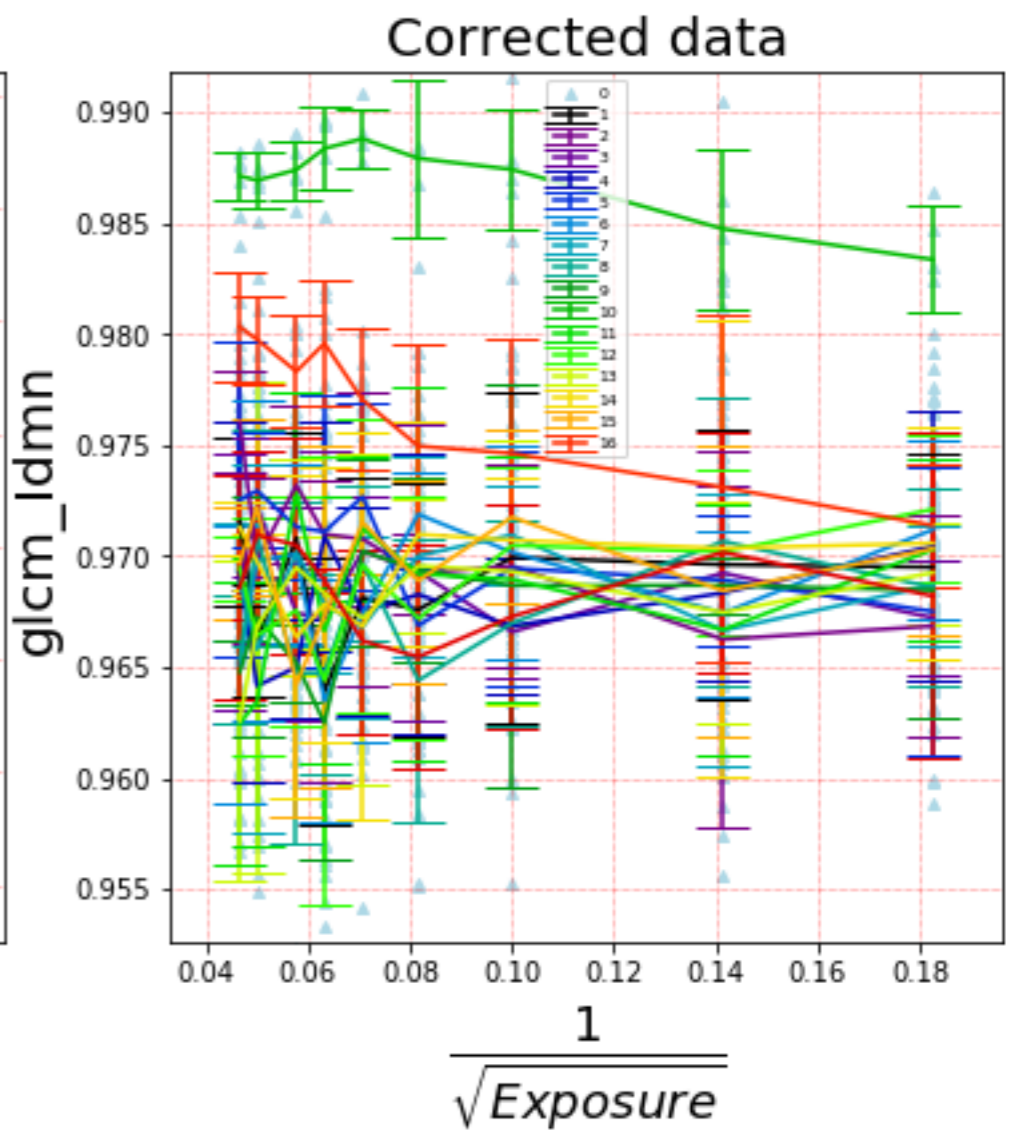

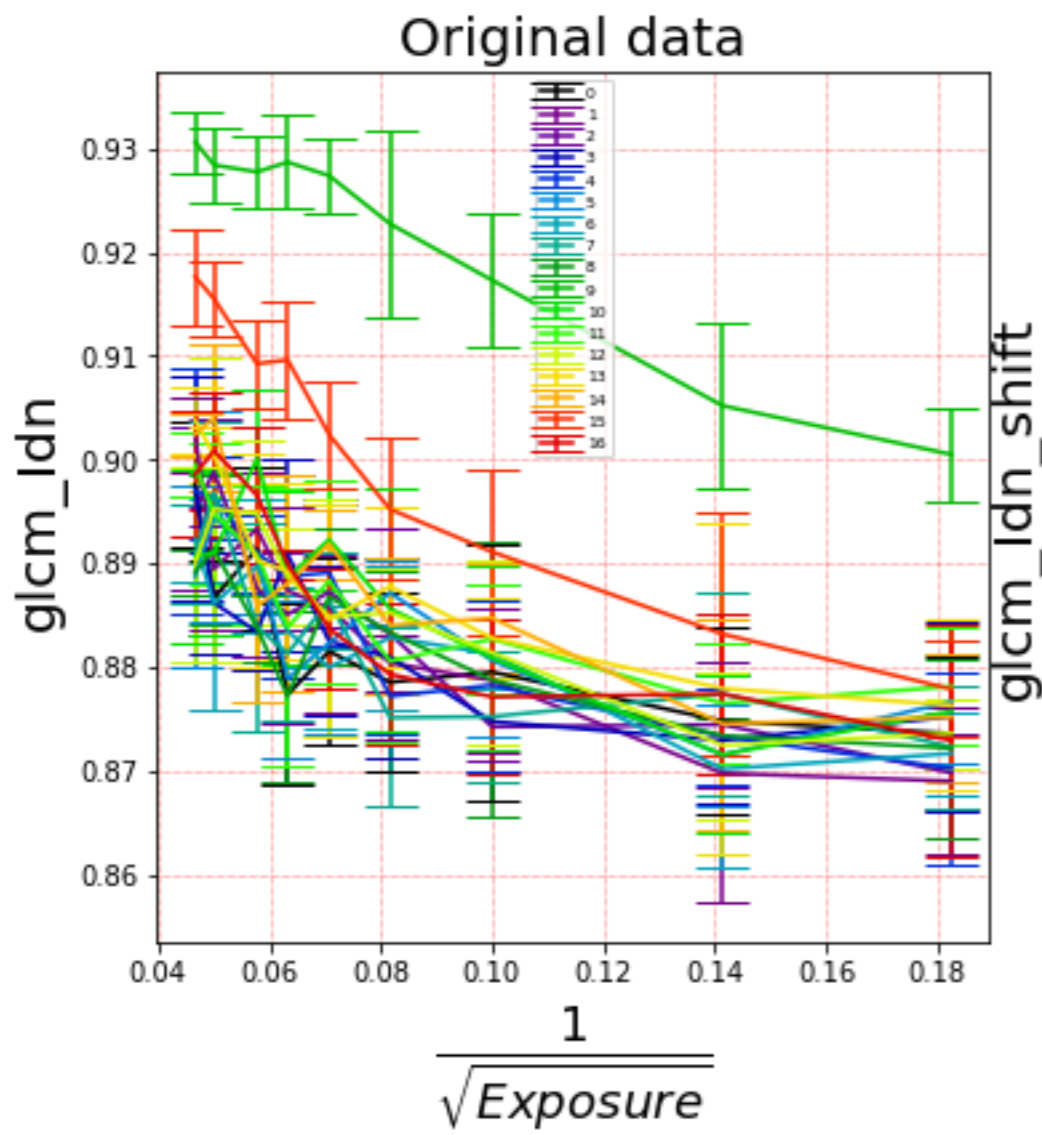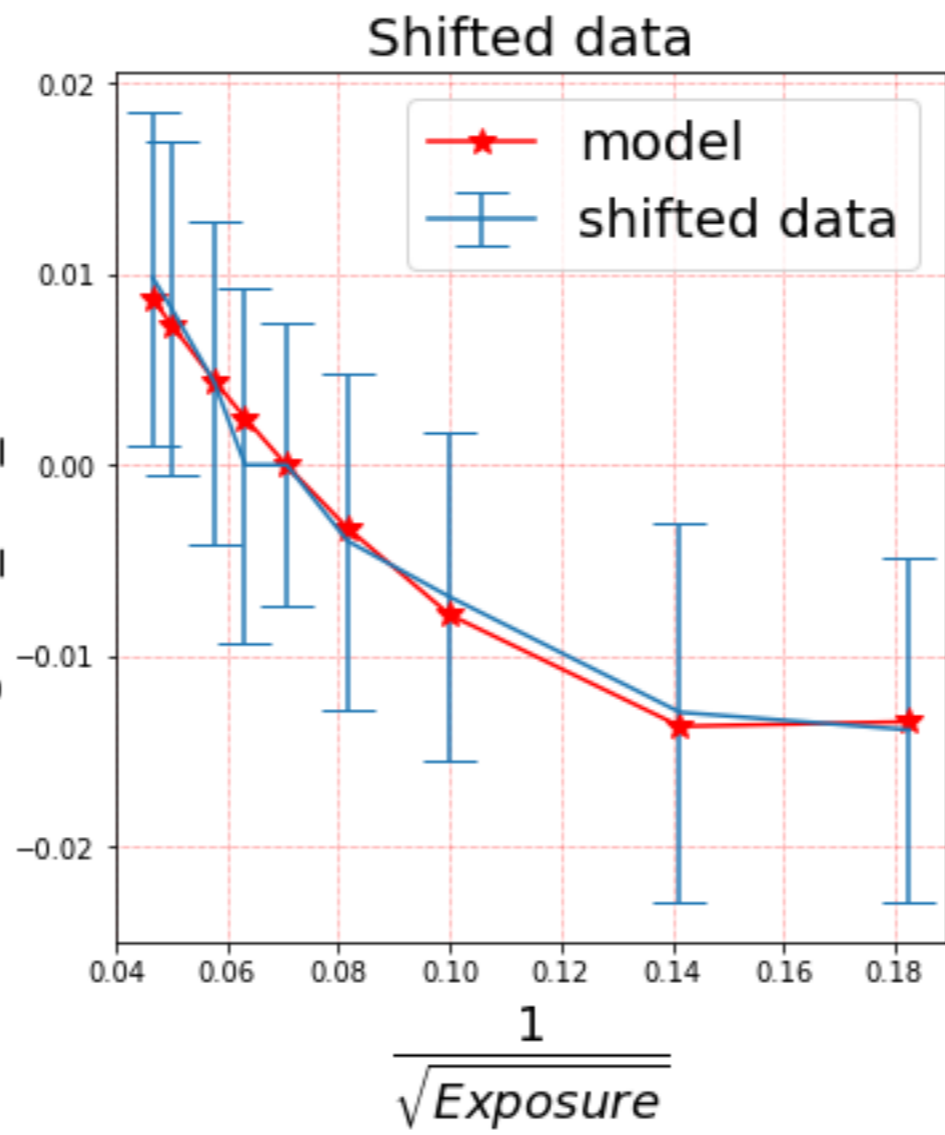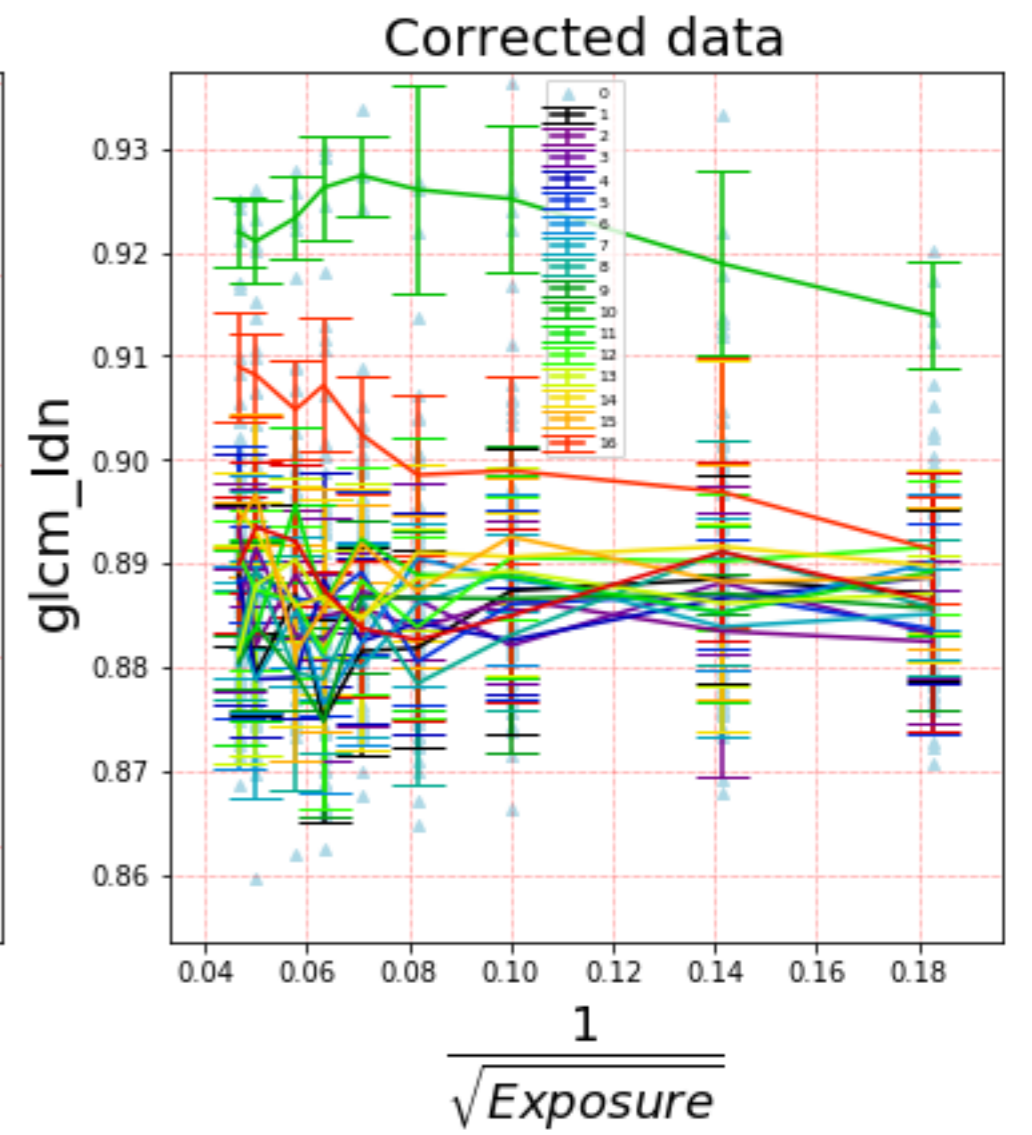



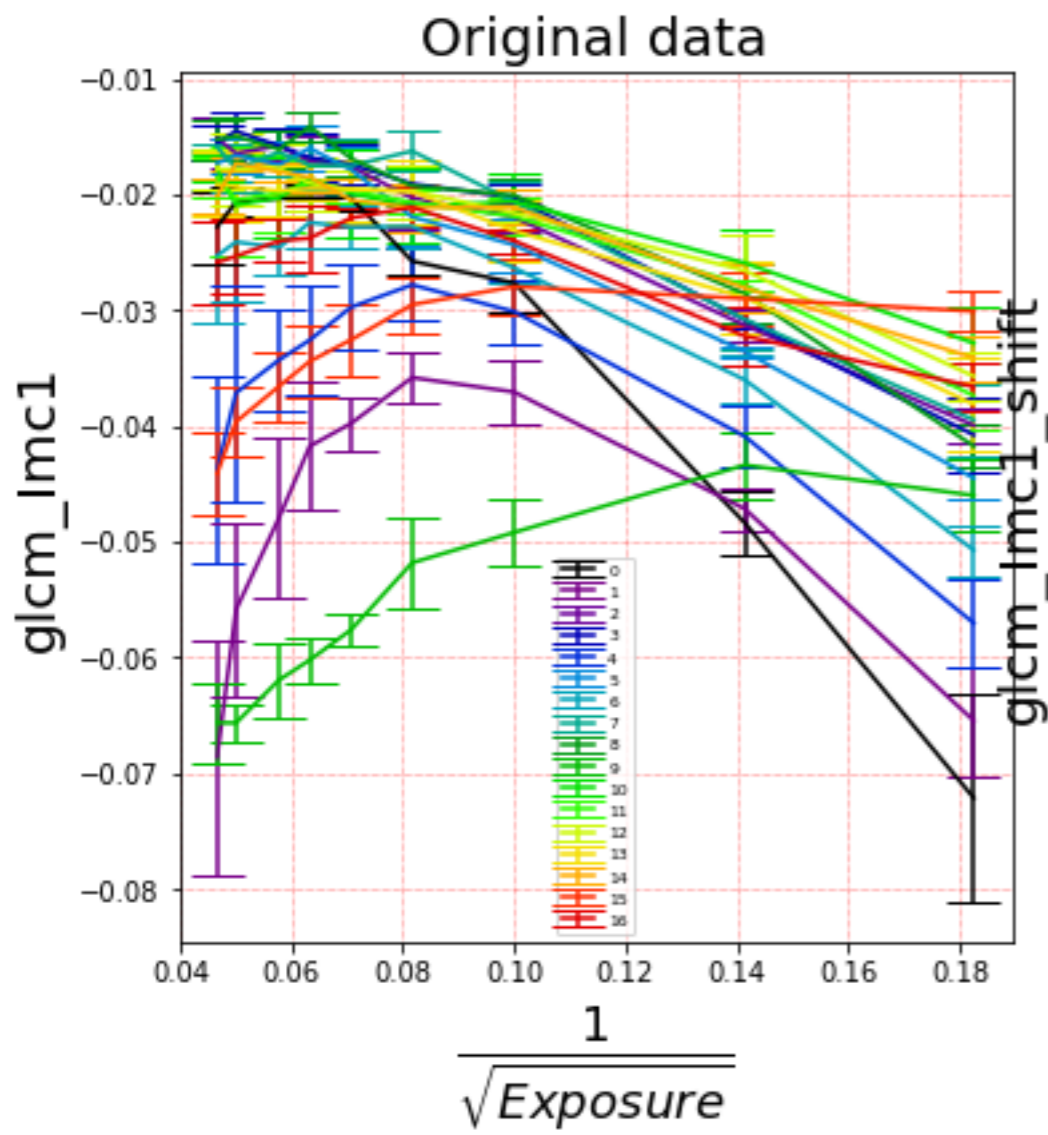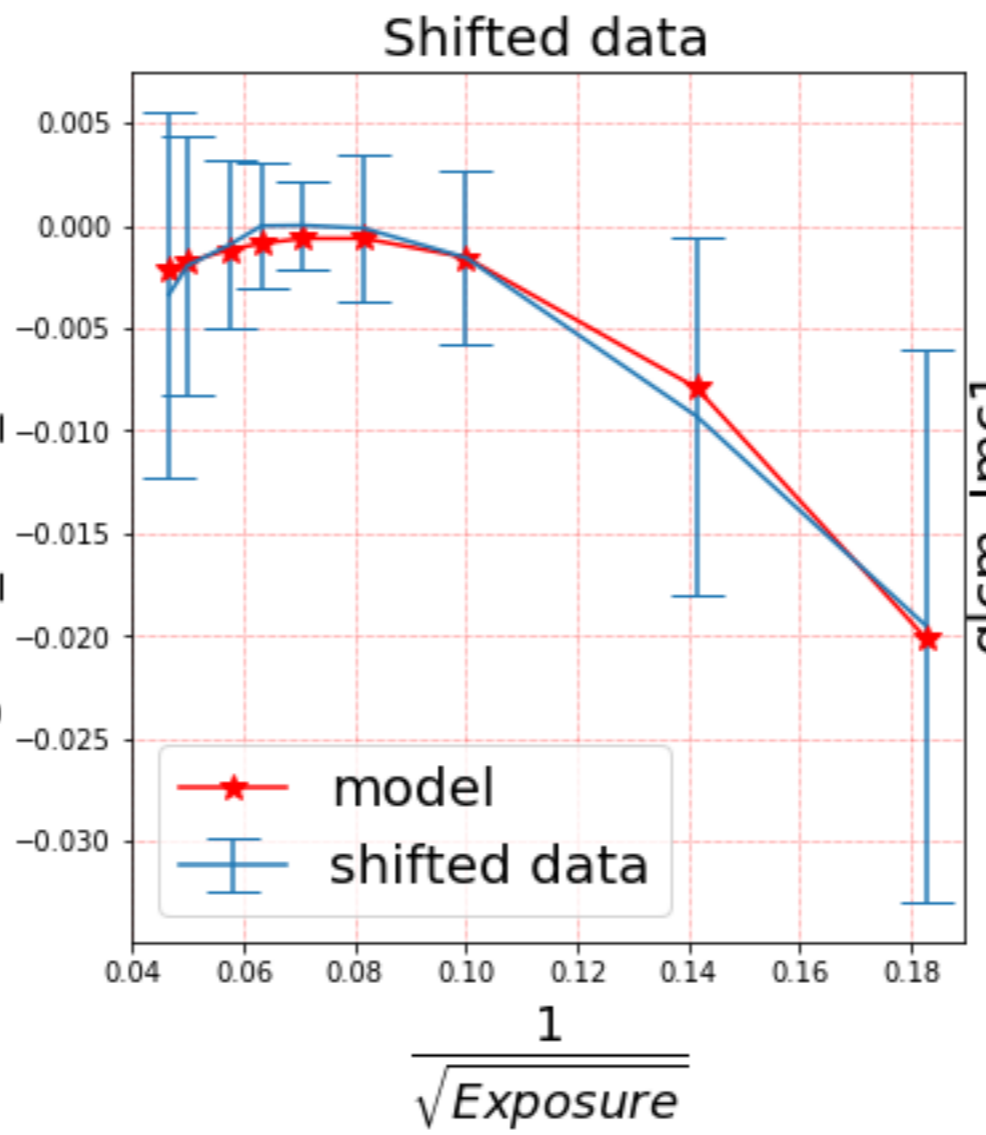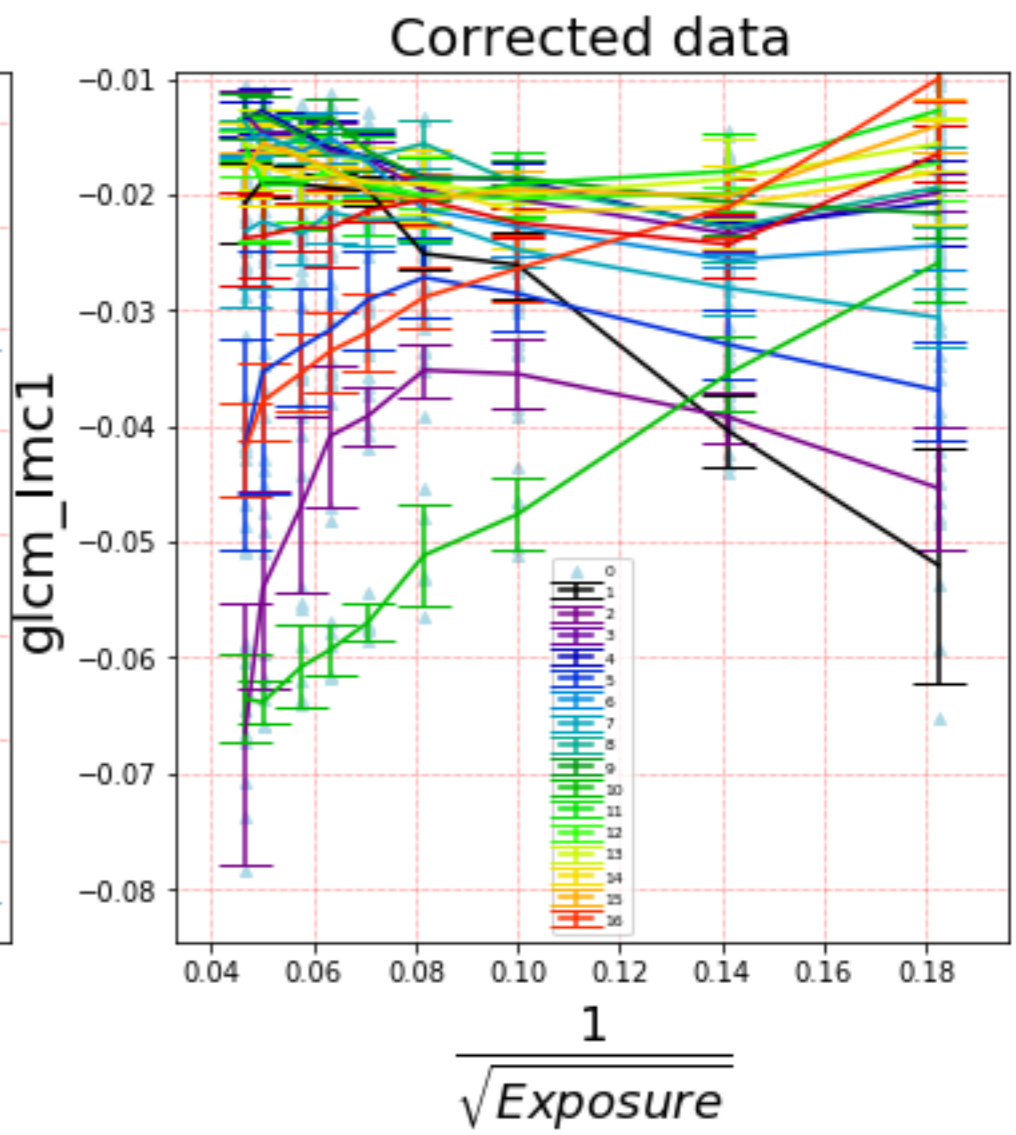

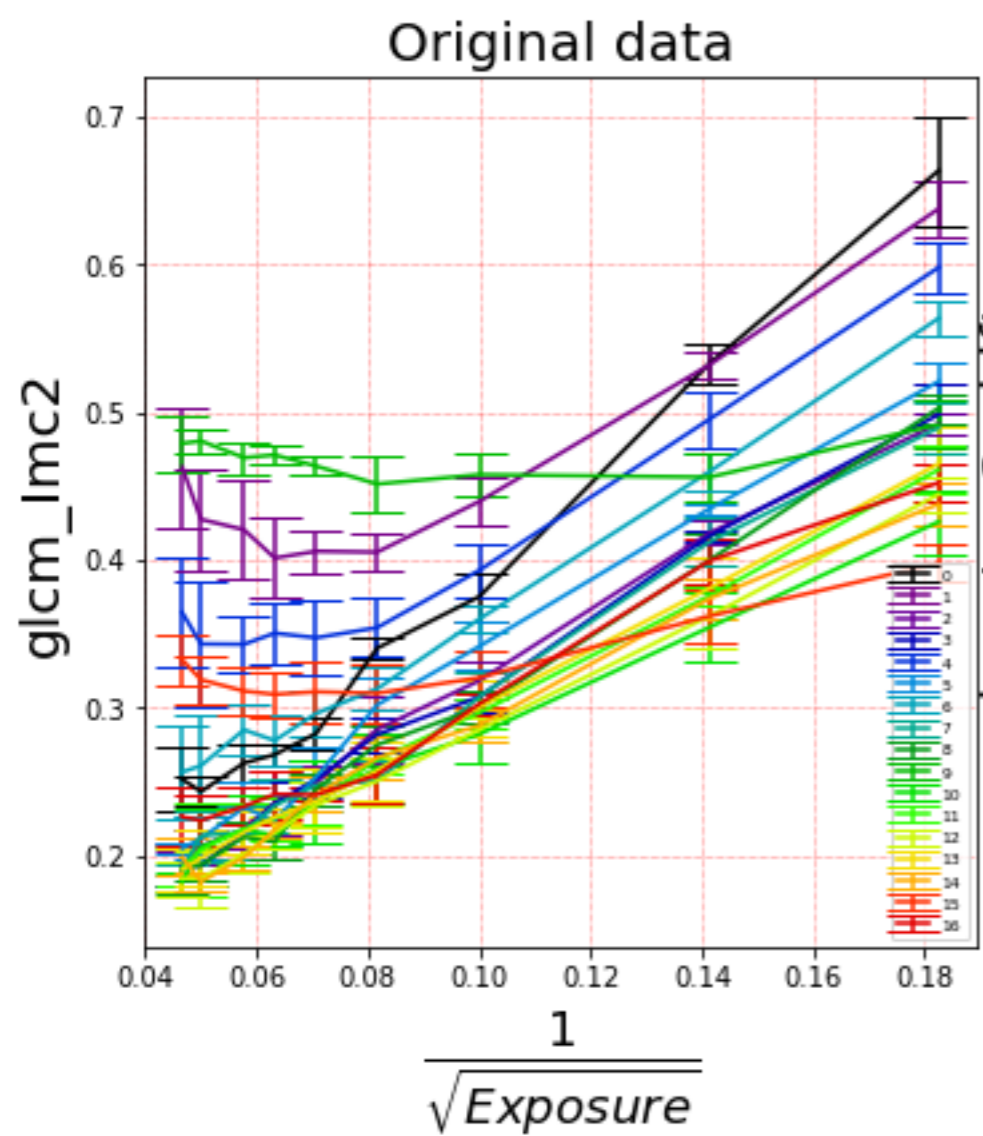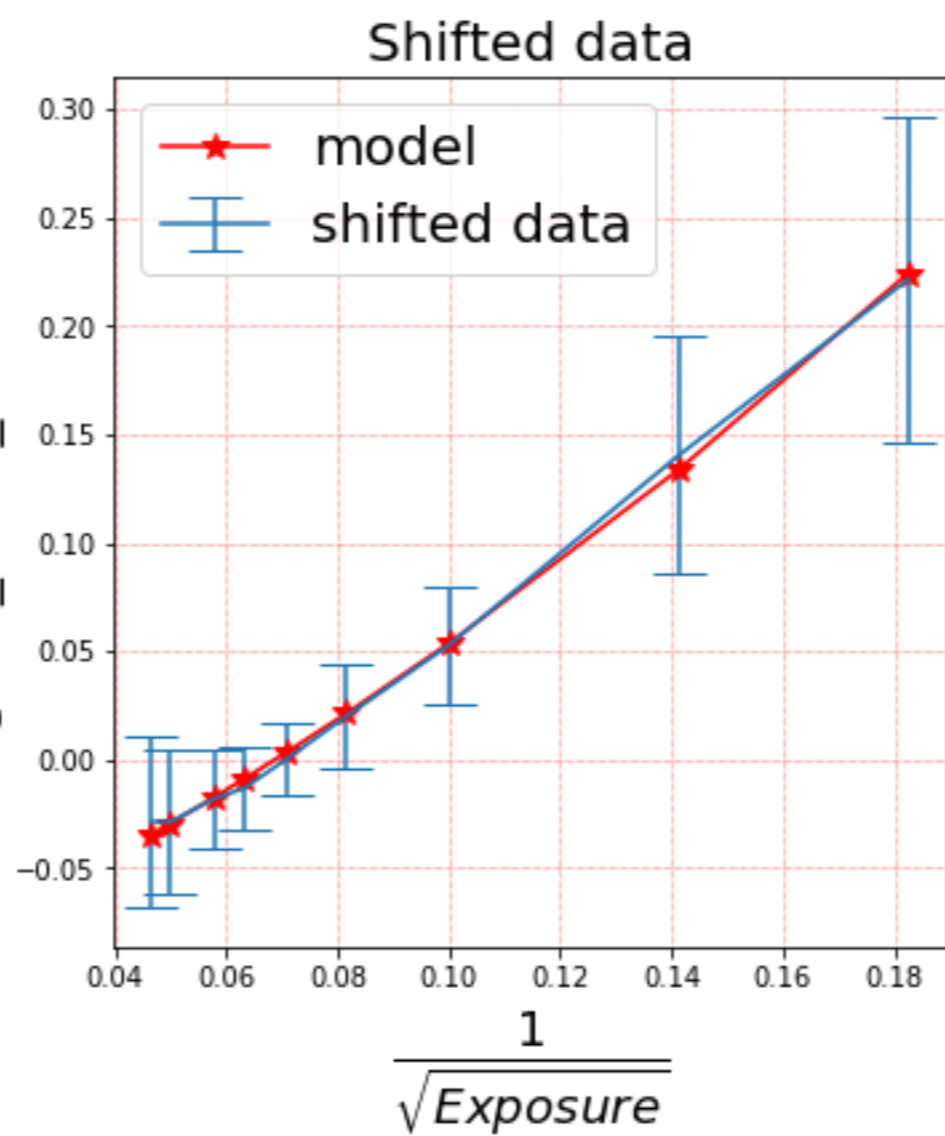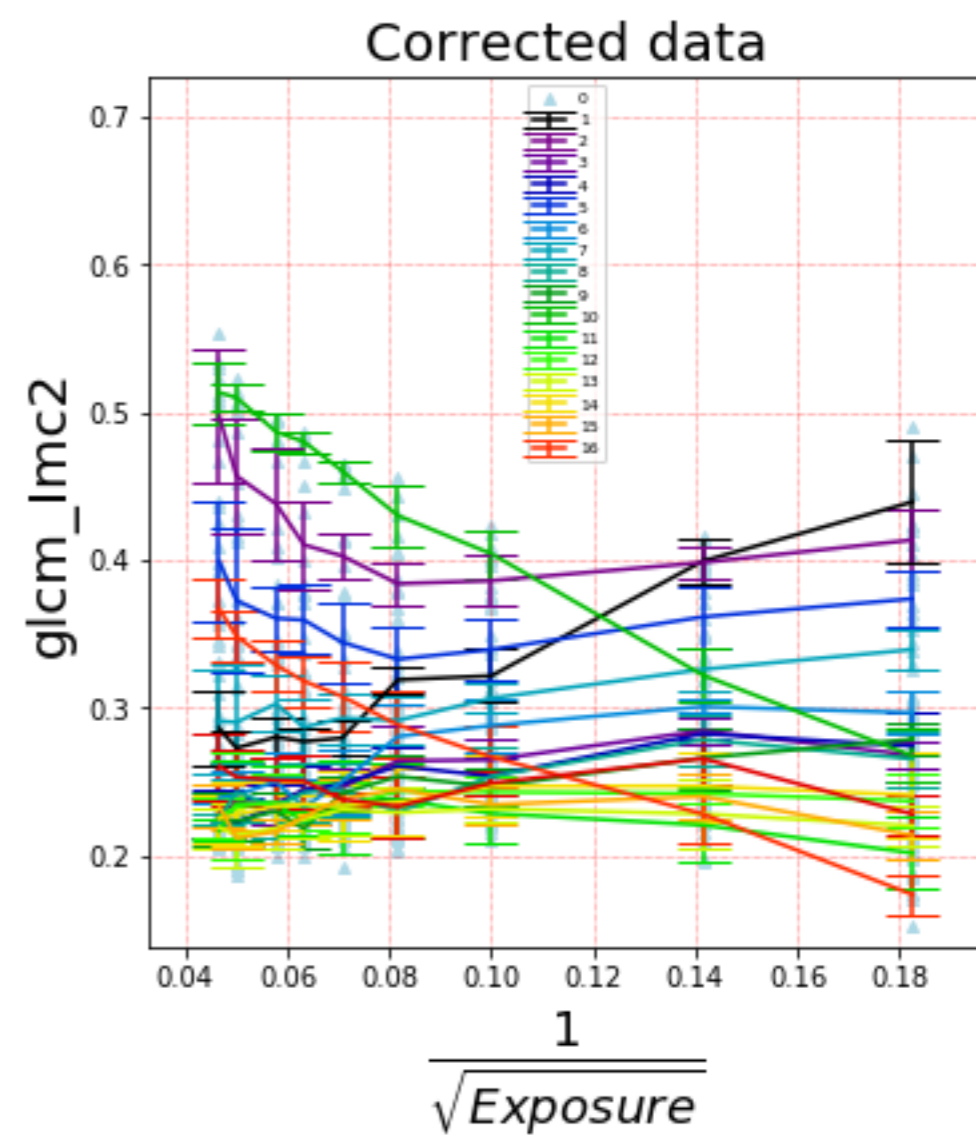



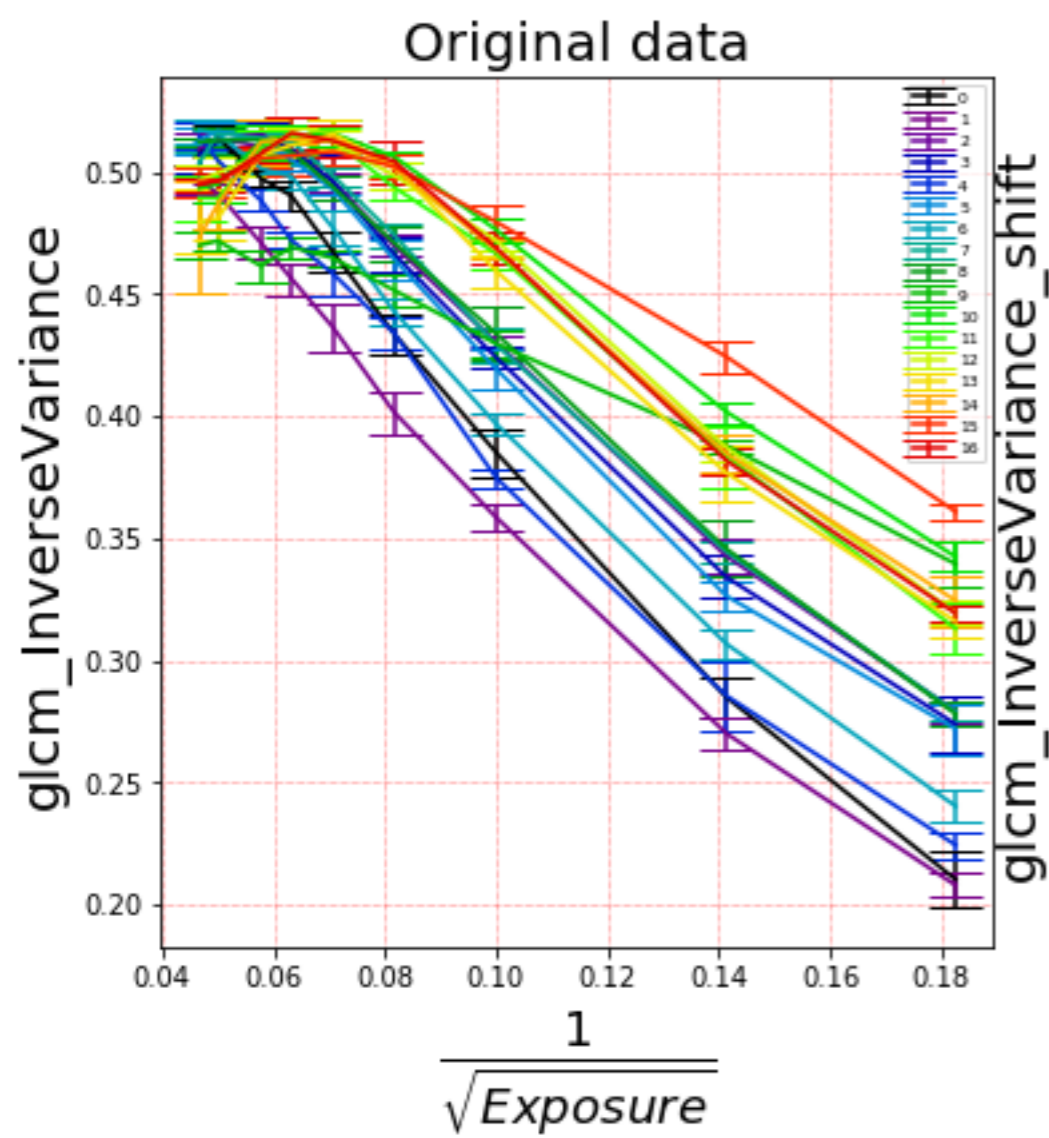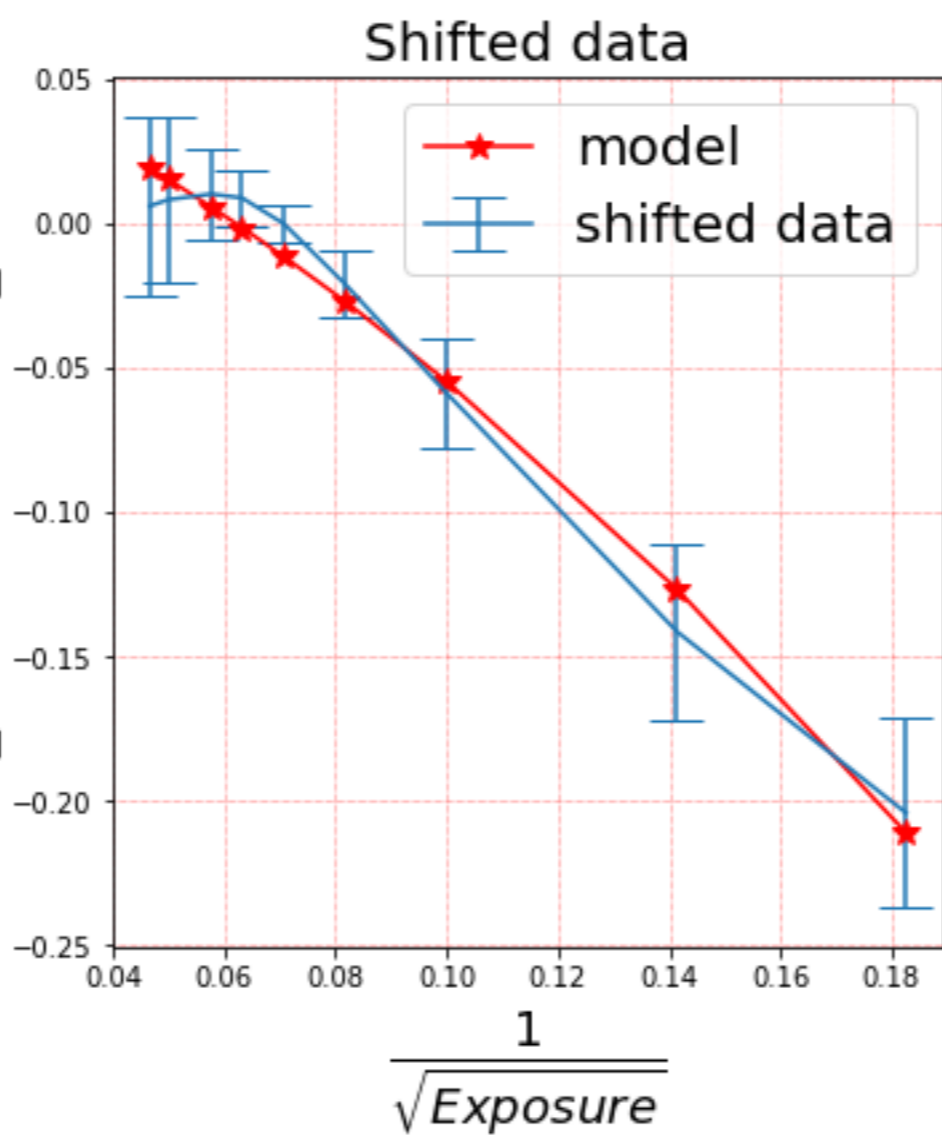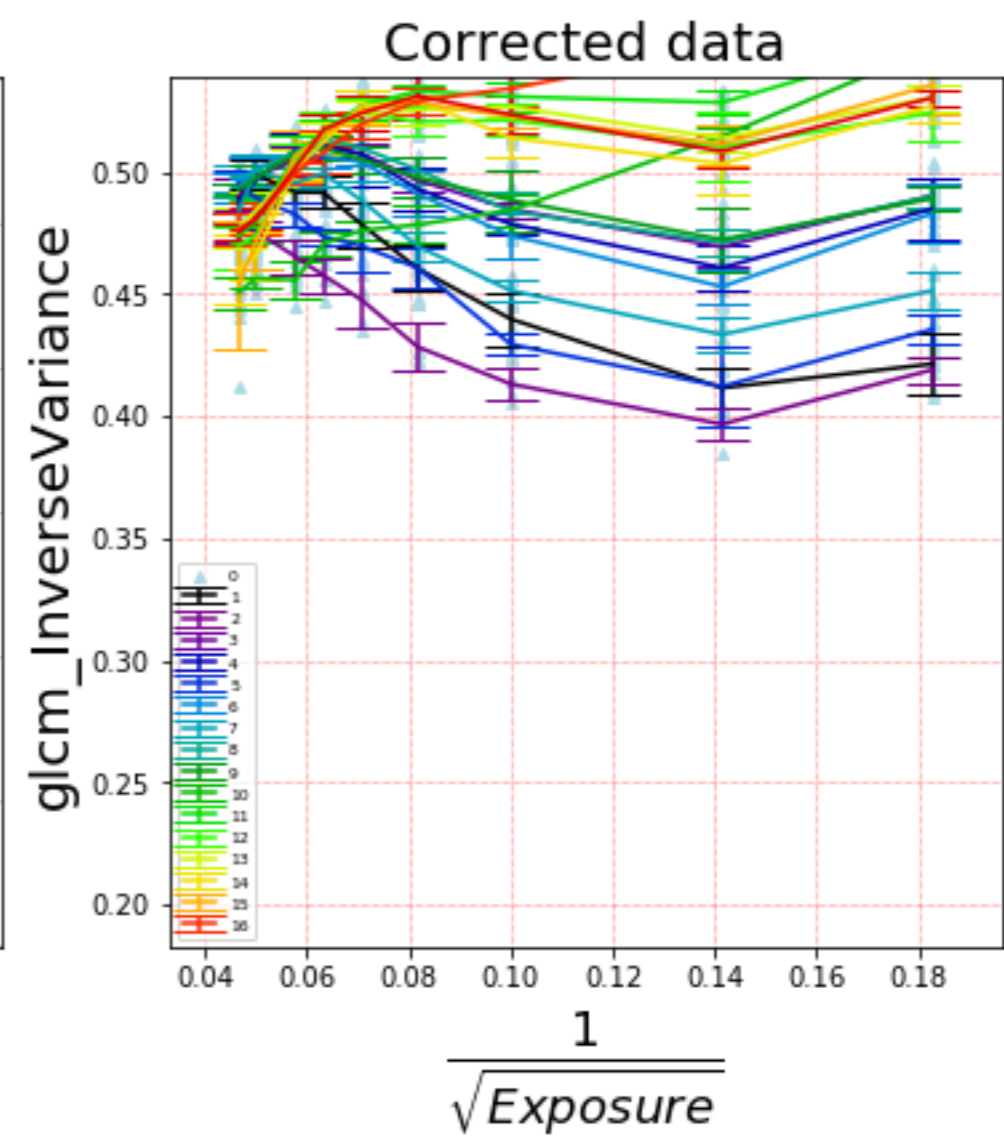

Original data

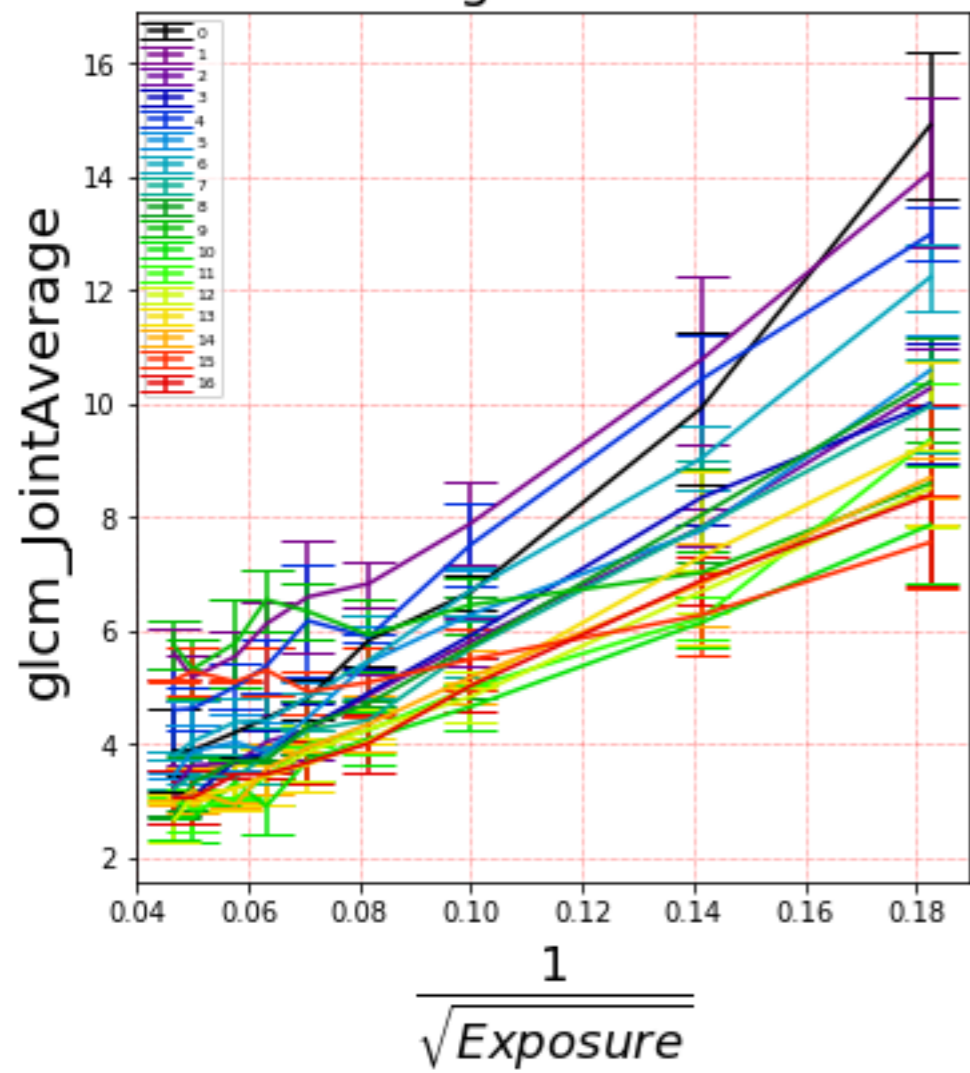

Shifted data

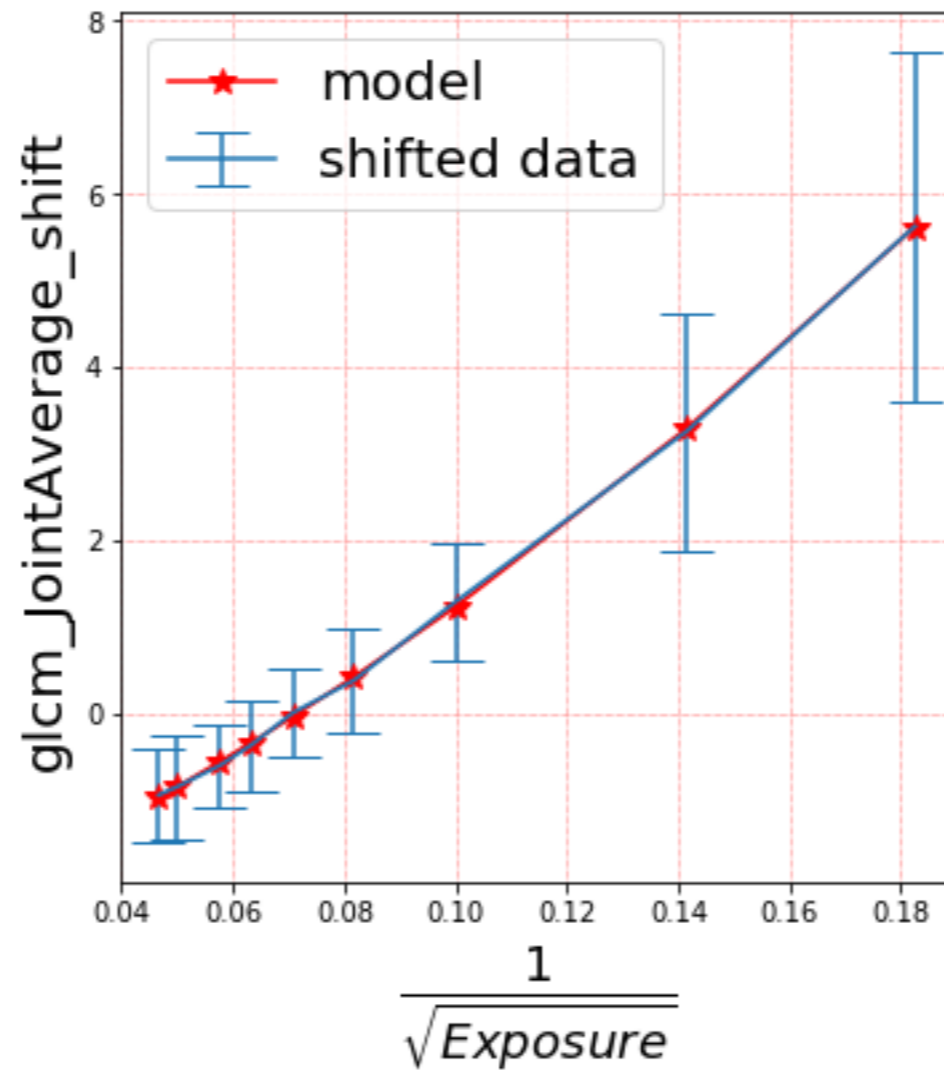

Corrected data

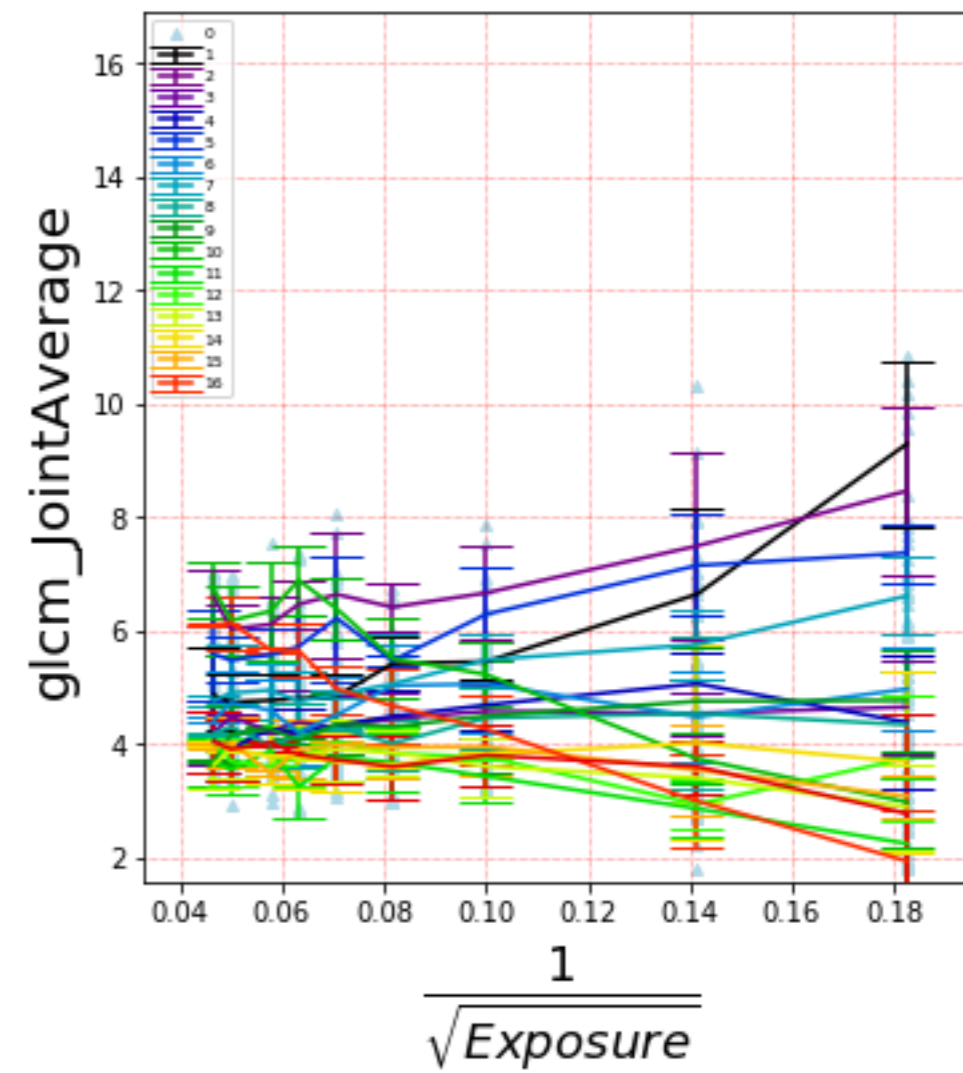

Original data

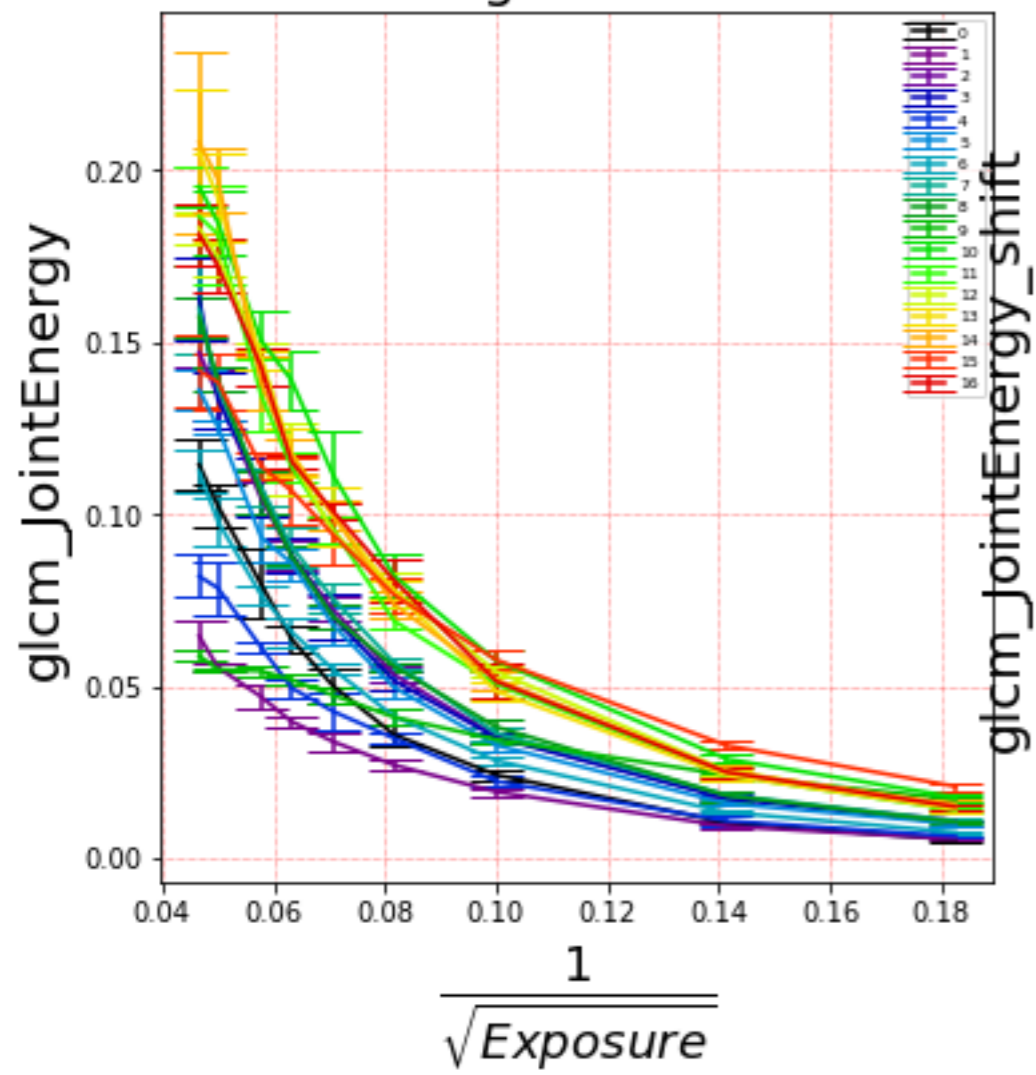

Shifted data

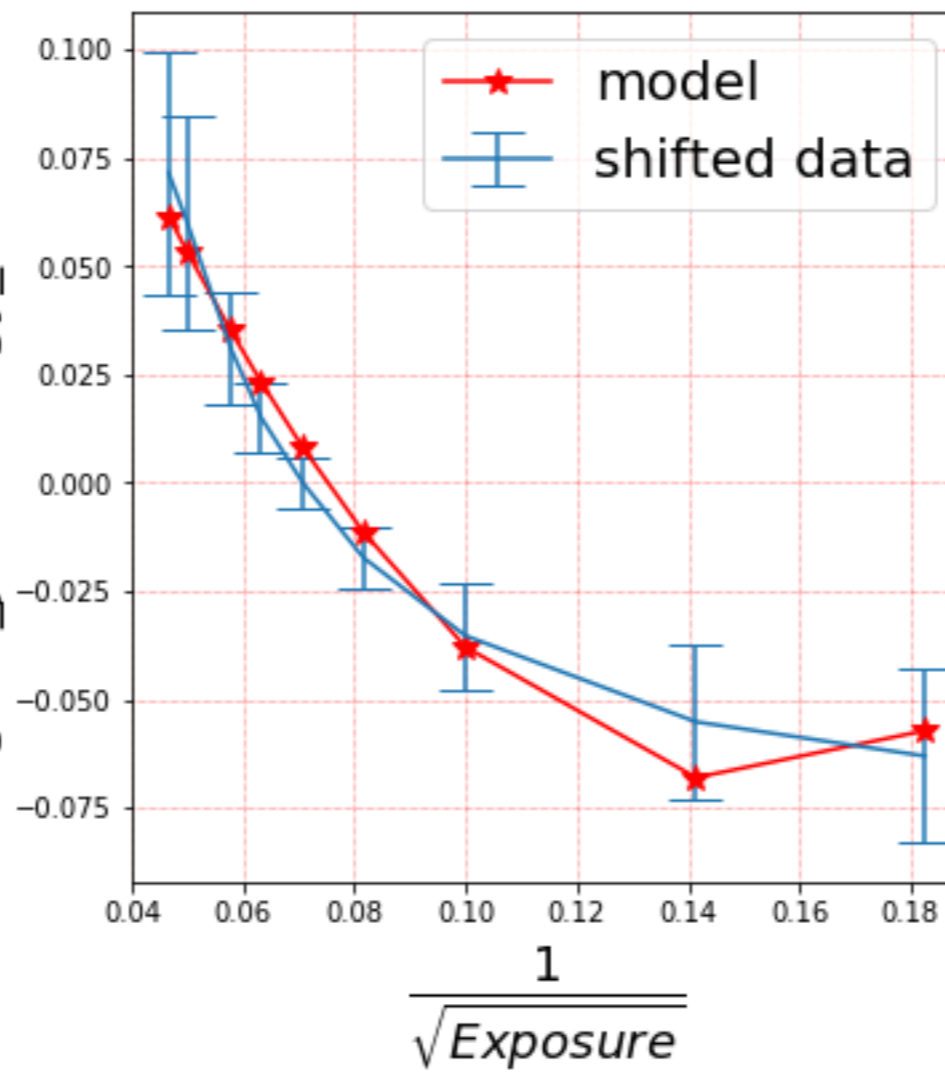

Corrected data

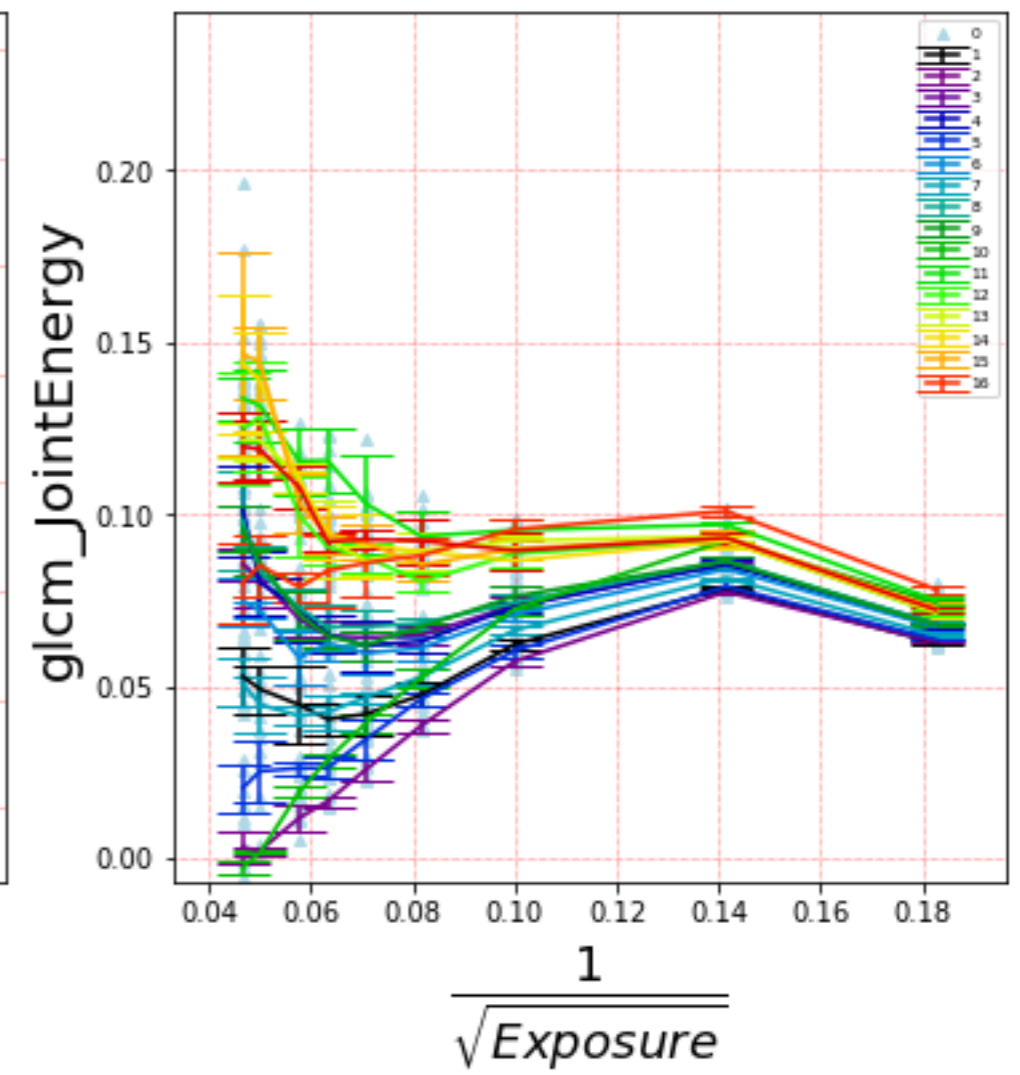

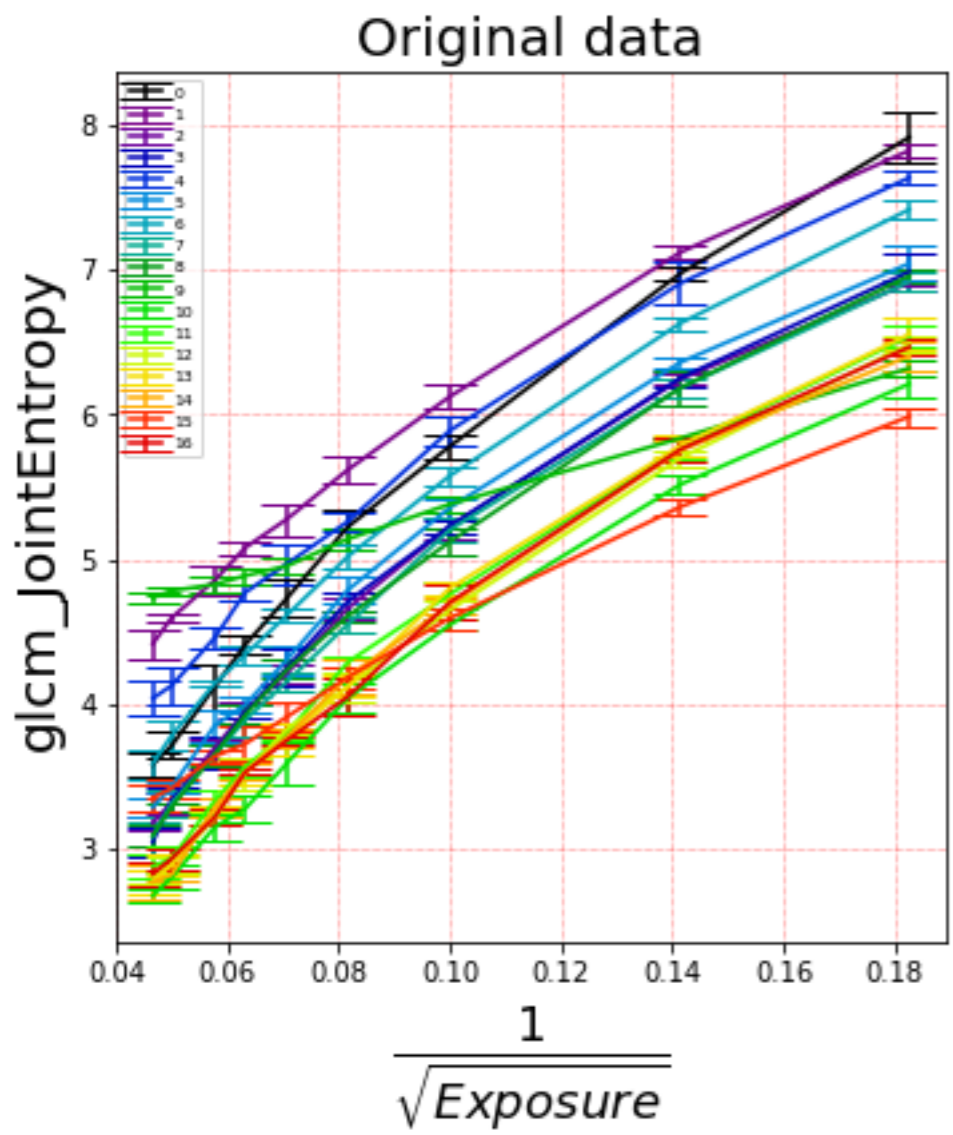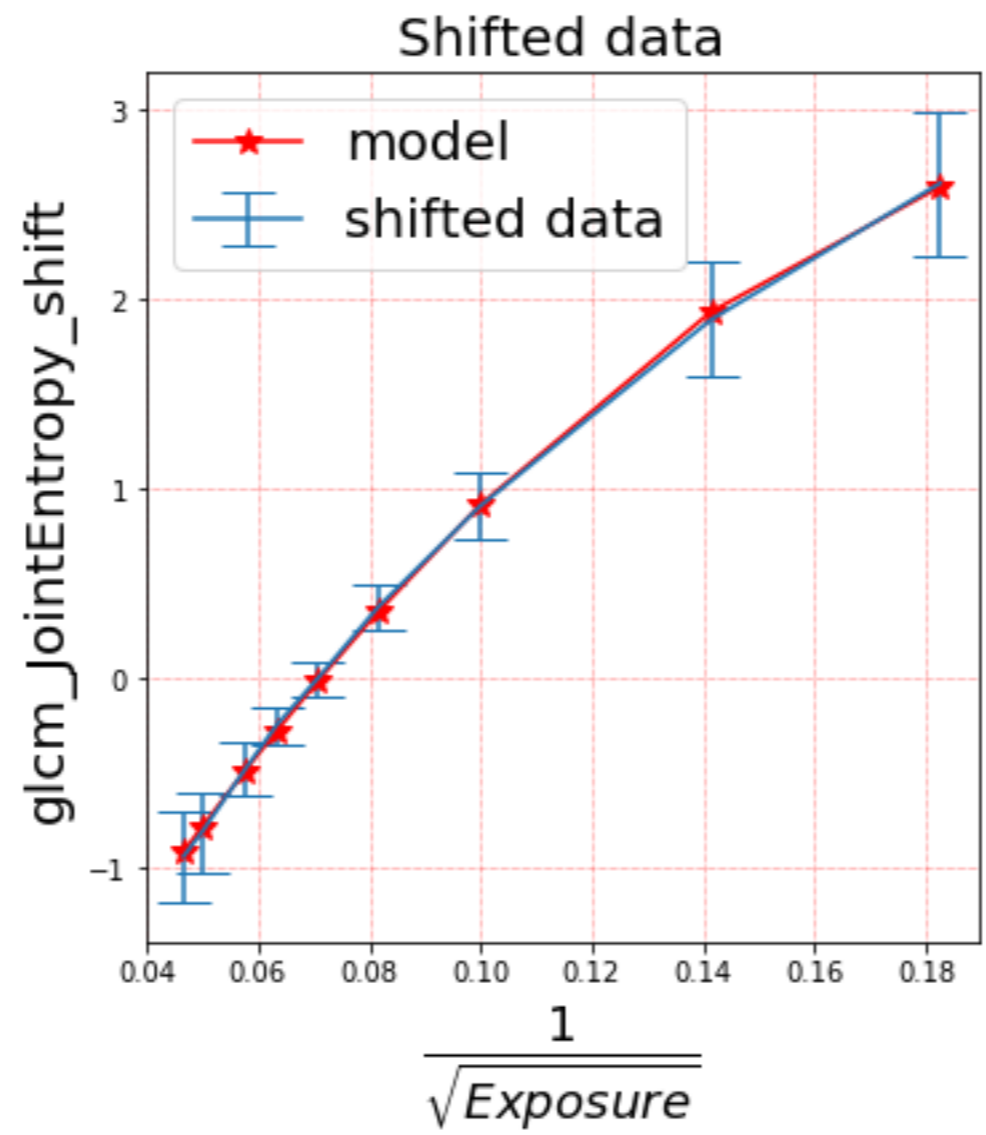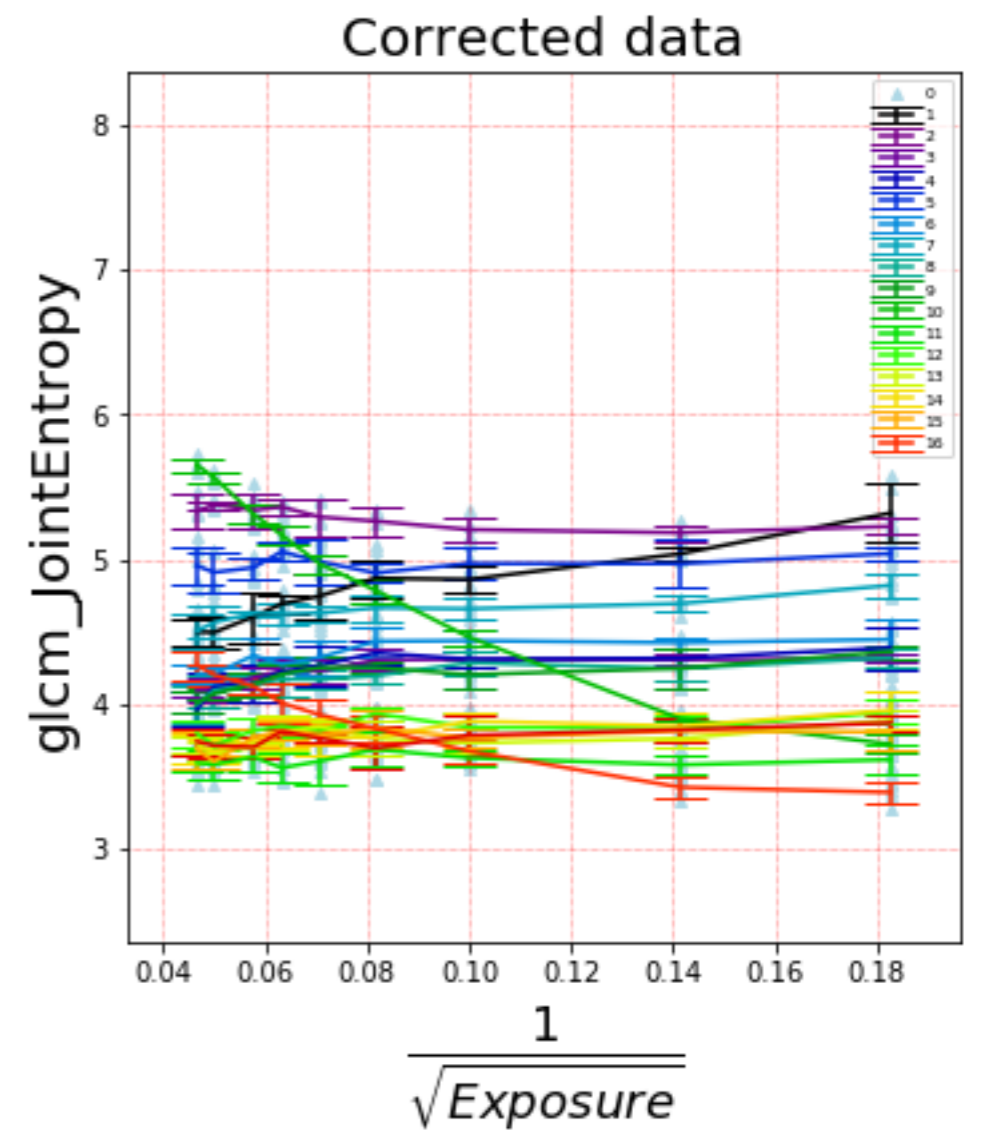



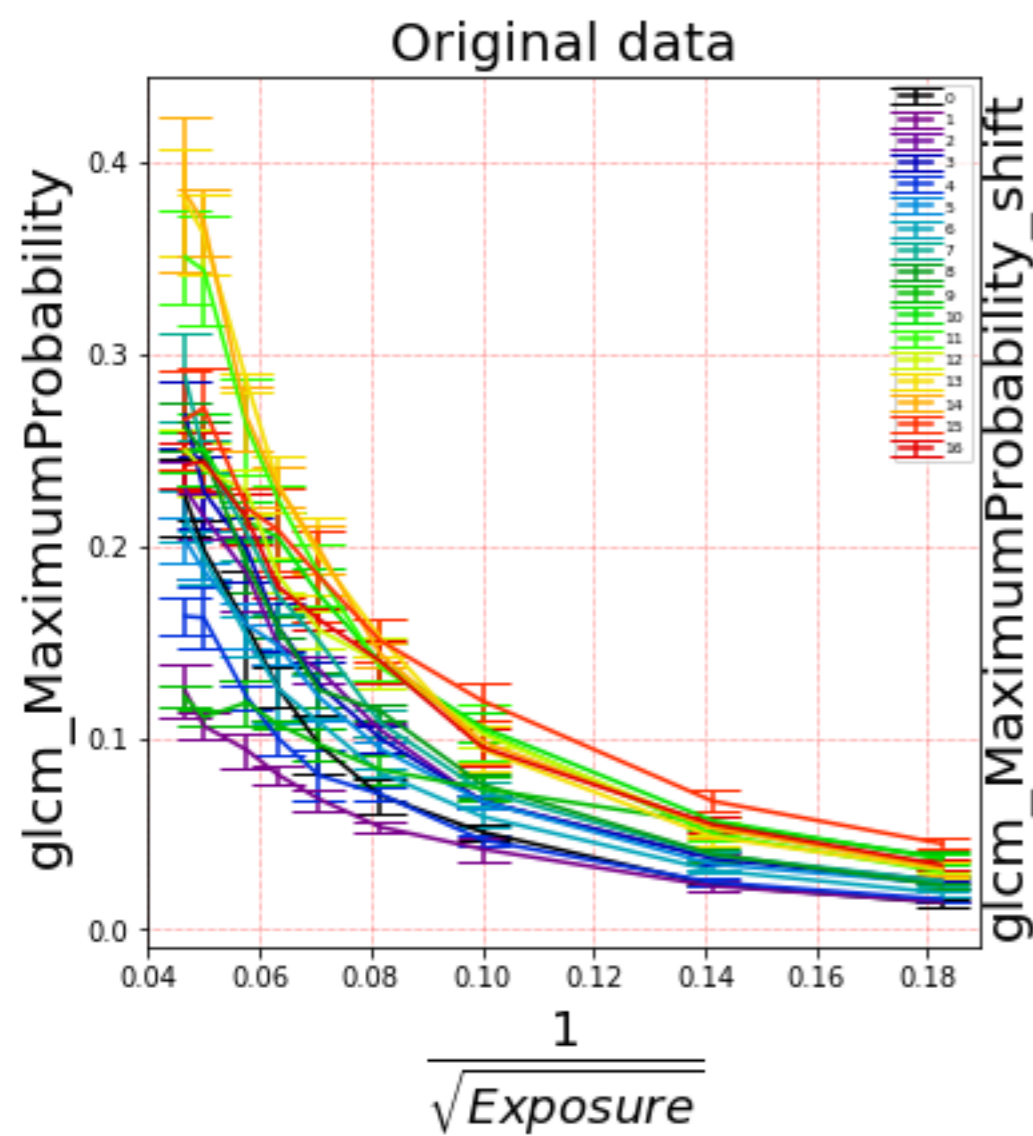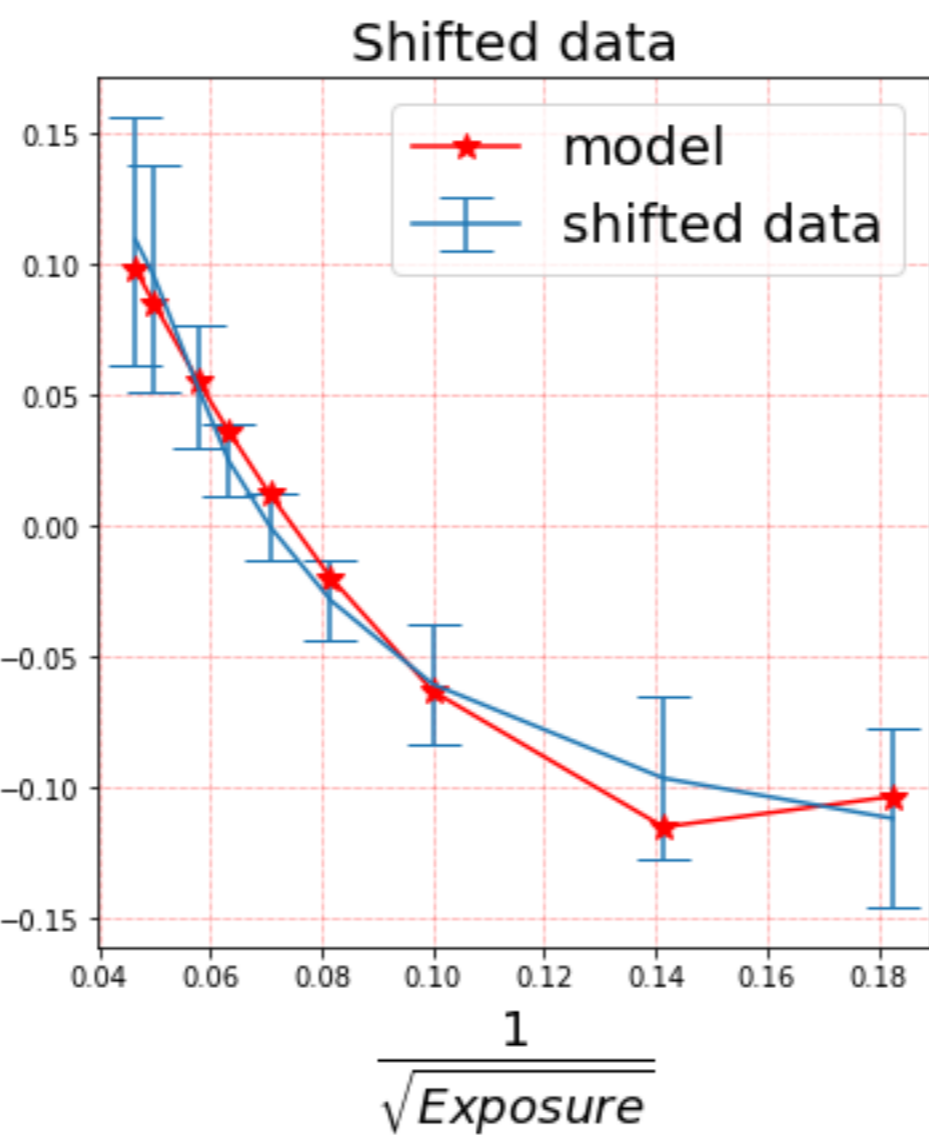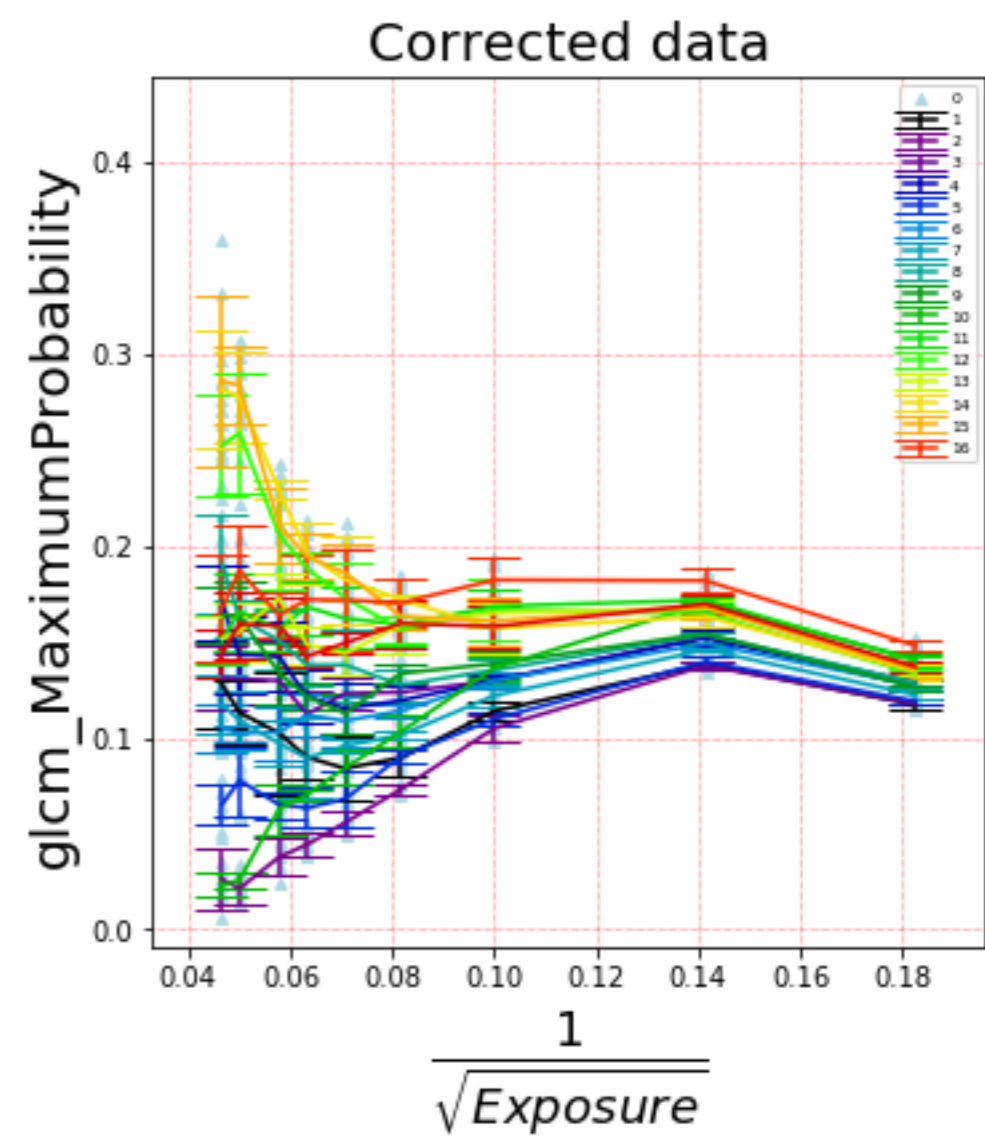



Original data

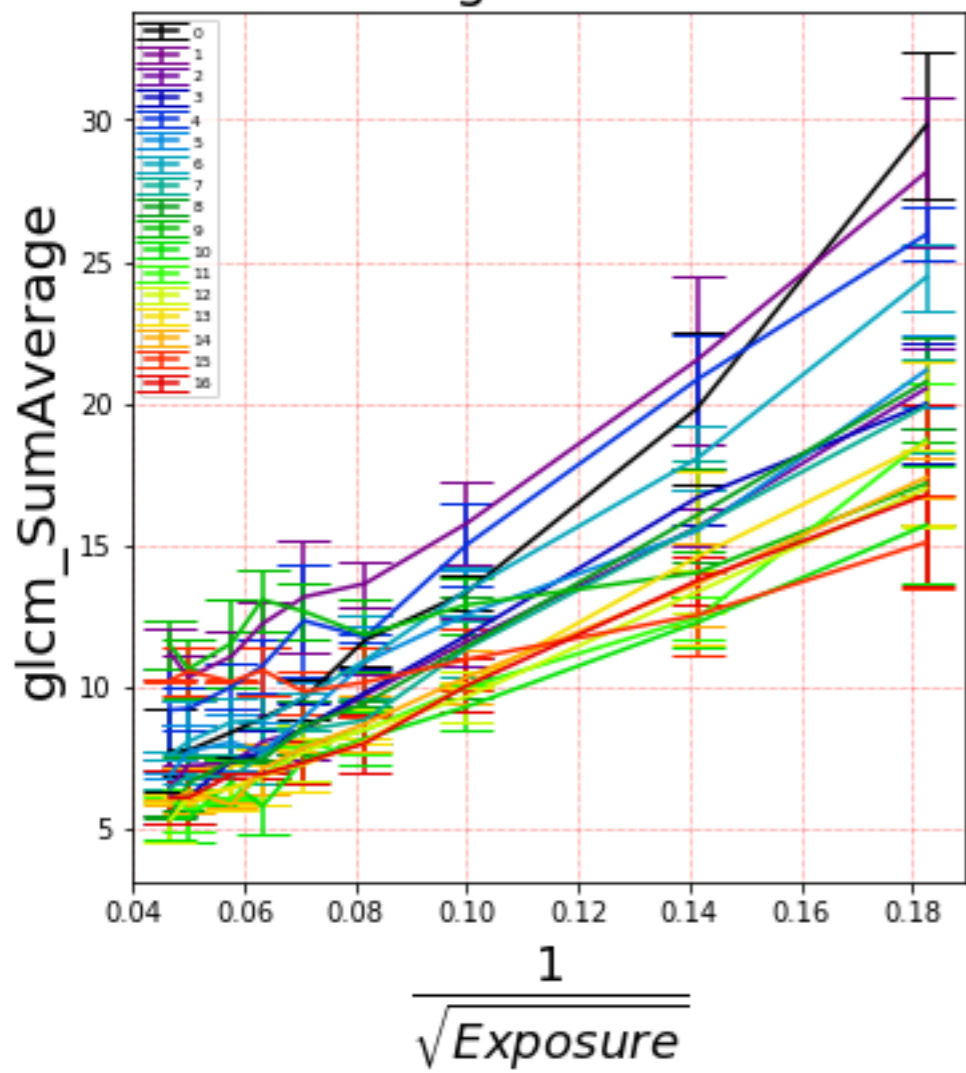

Shifted data

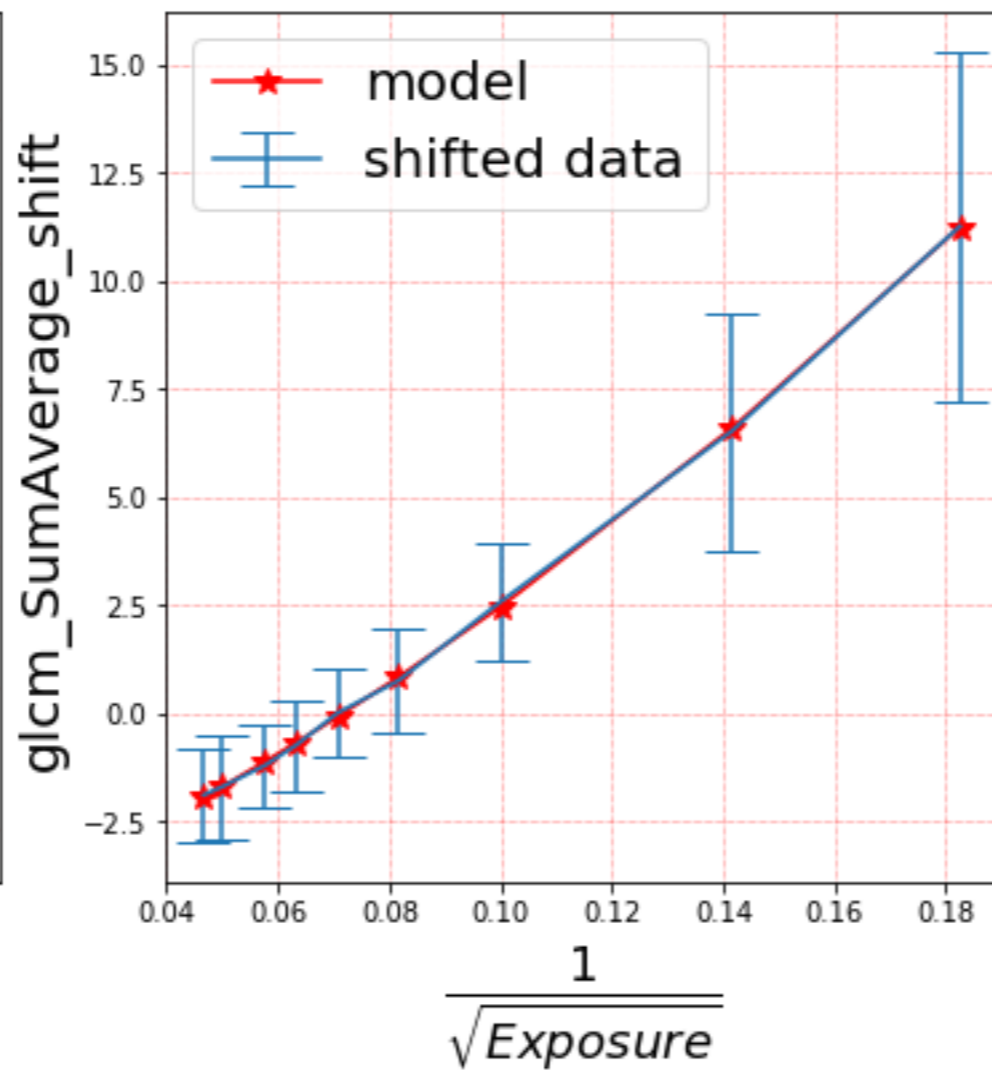

Corrected data

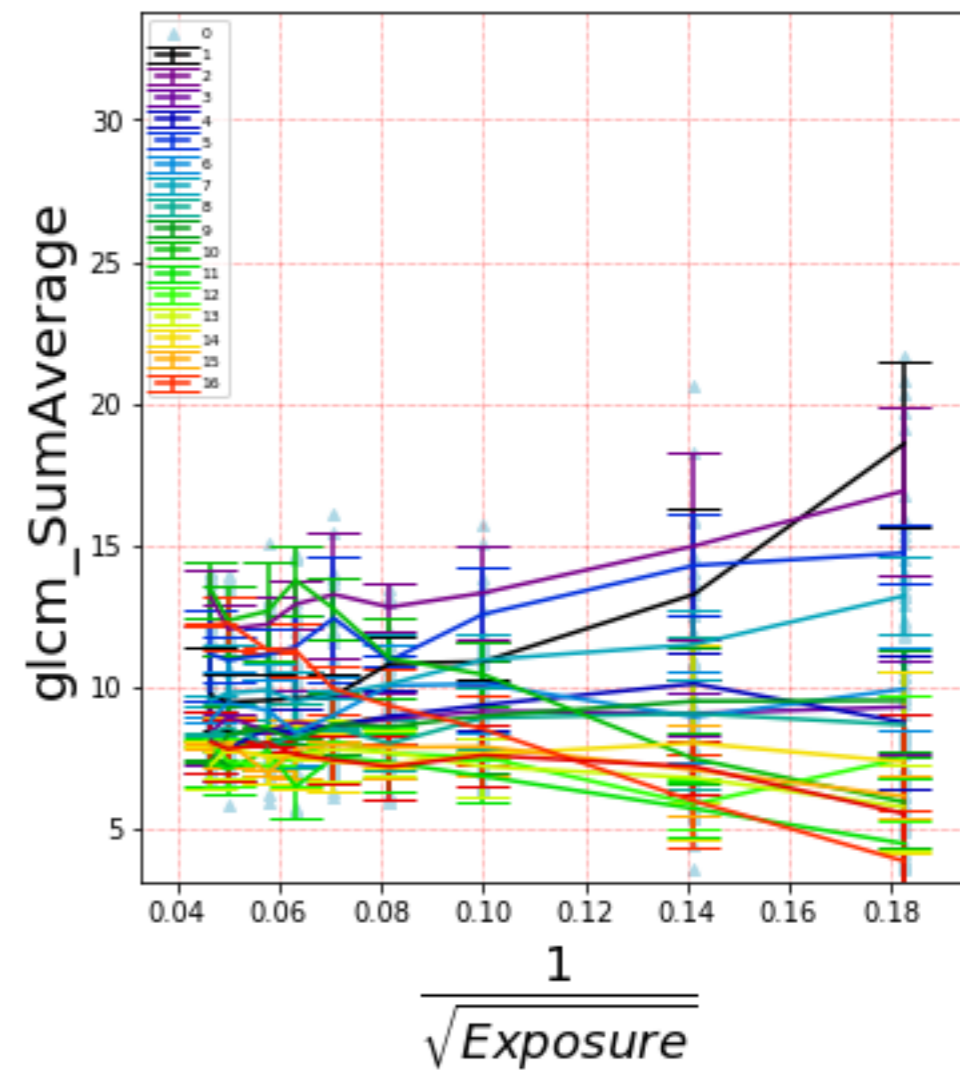

Original data

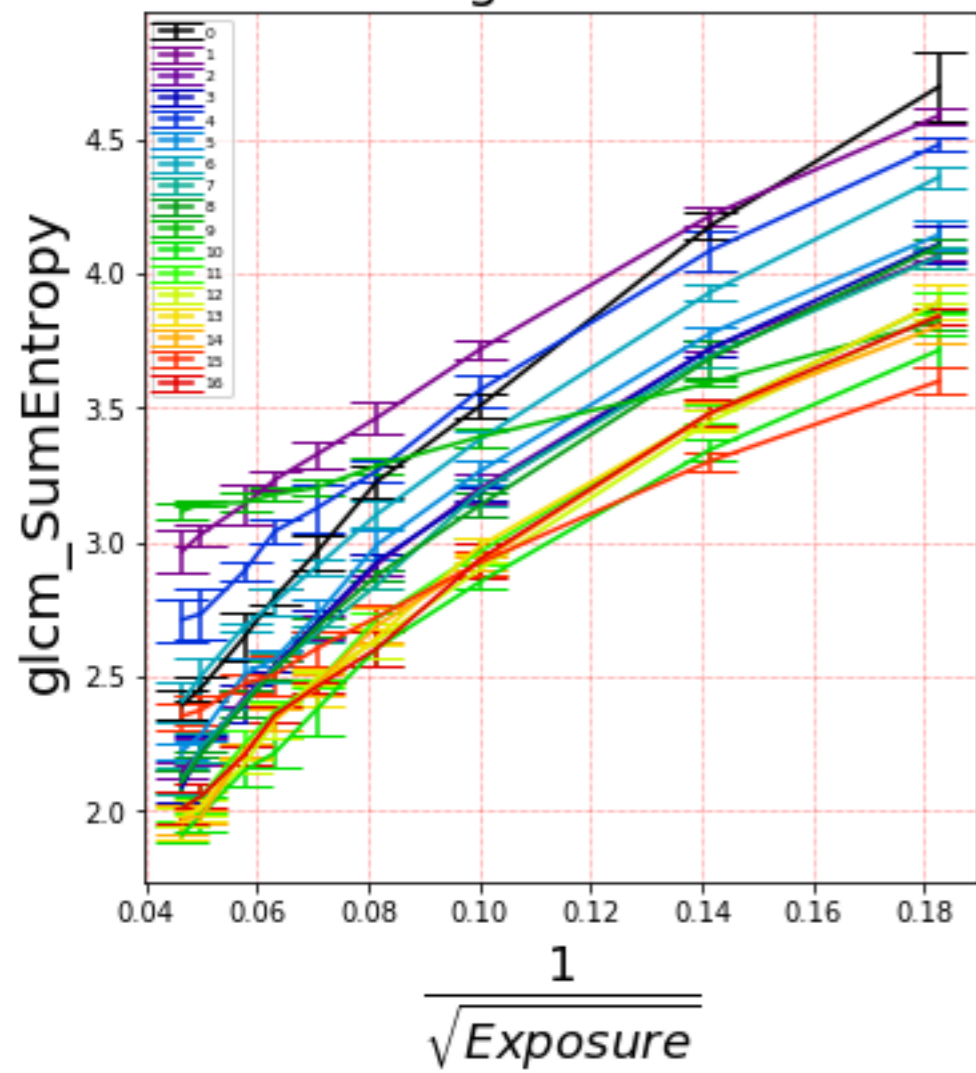

Shifted data

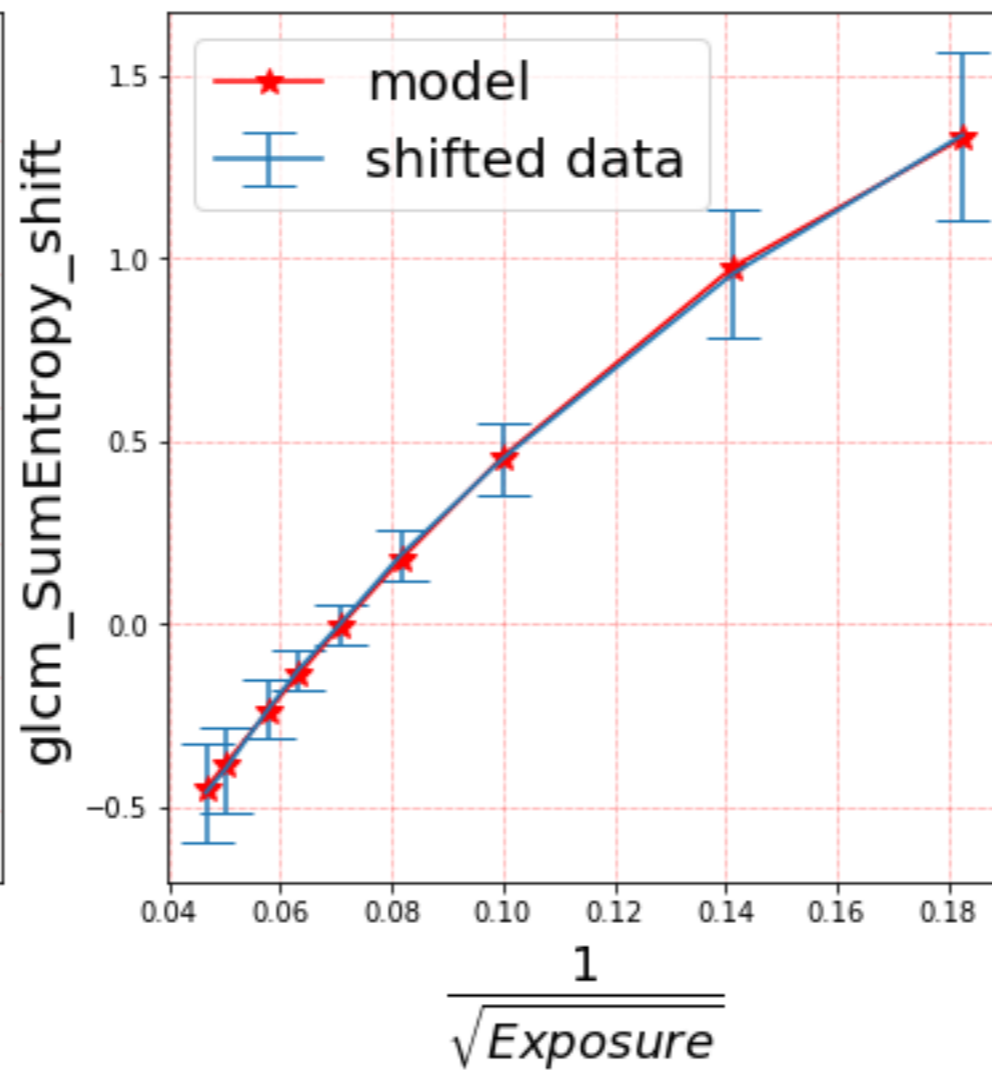

Corrected data

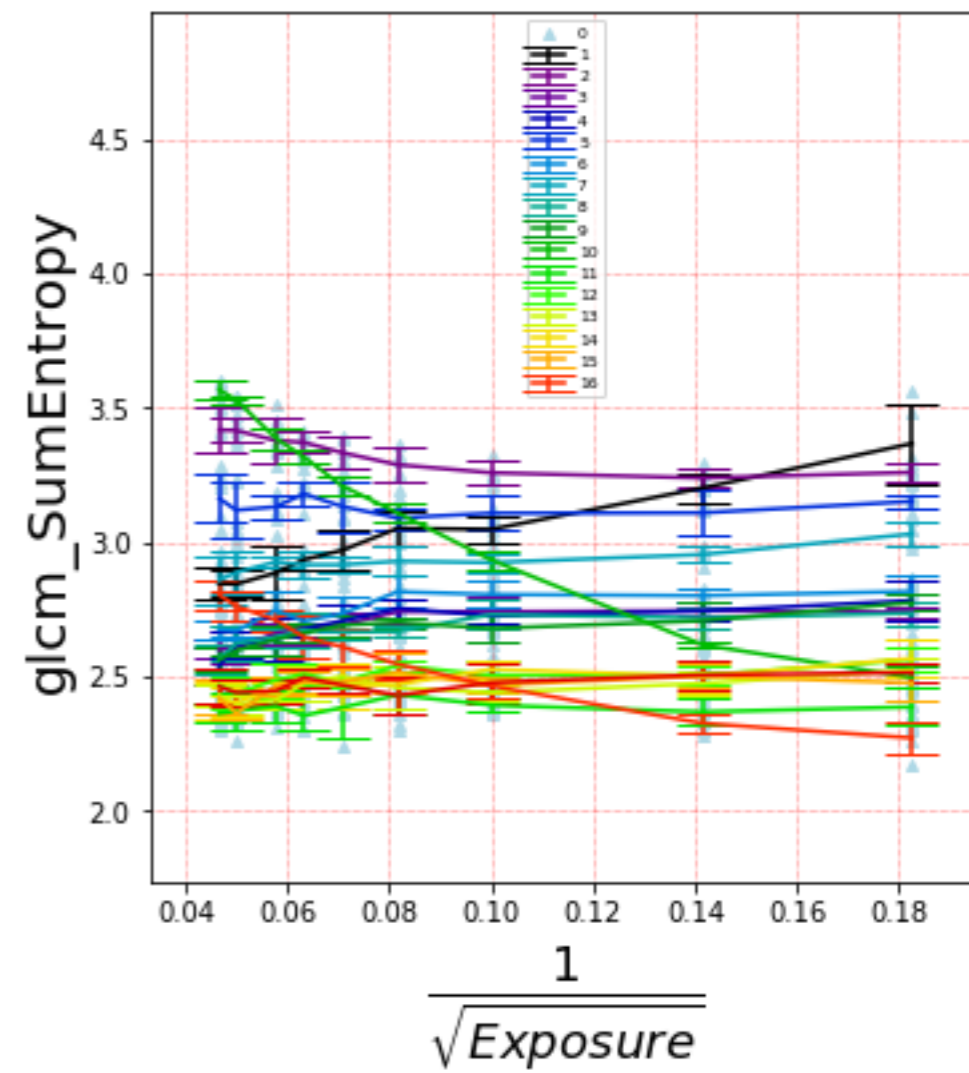

Original data

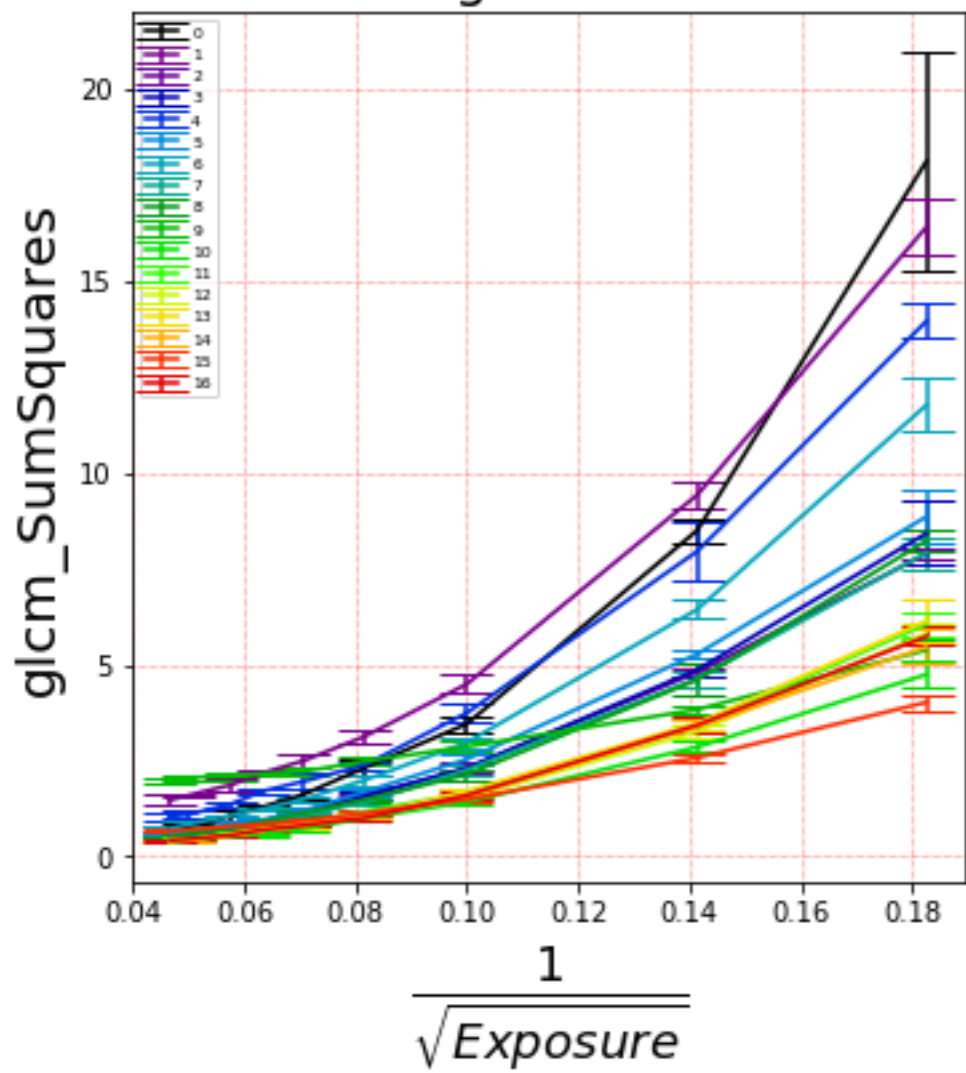

Shifted data

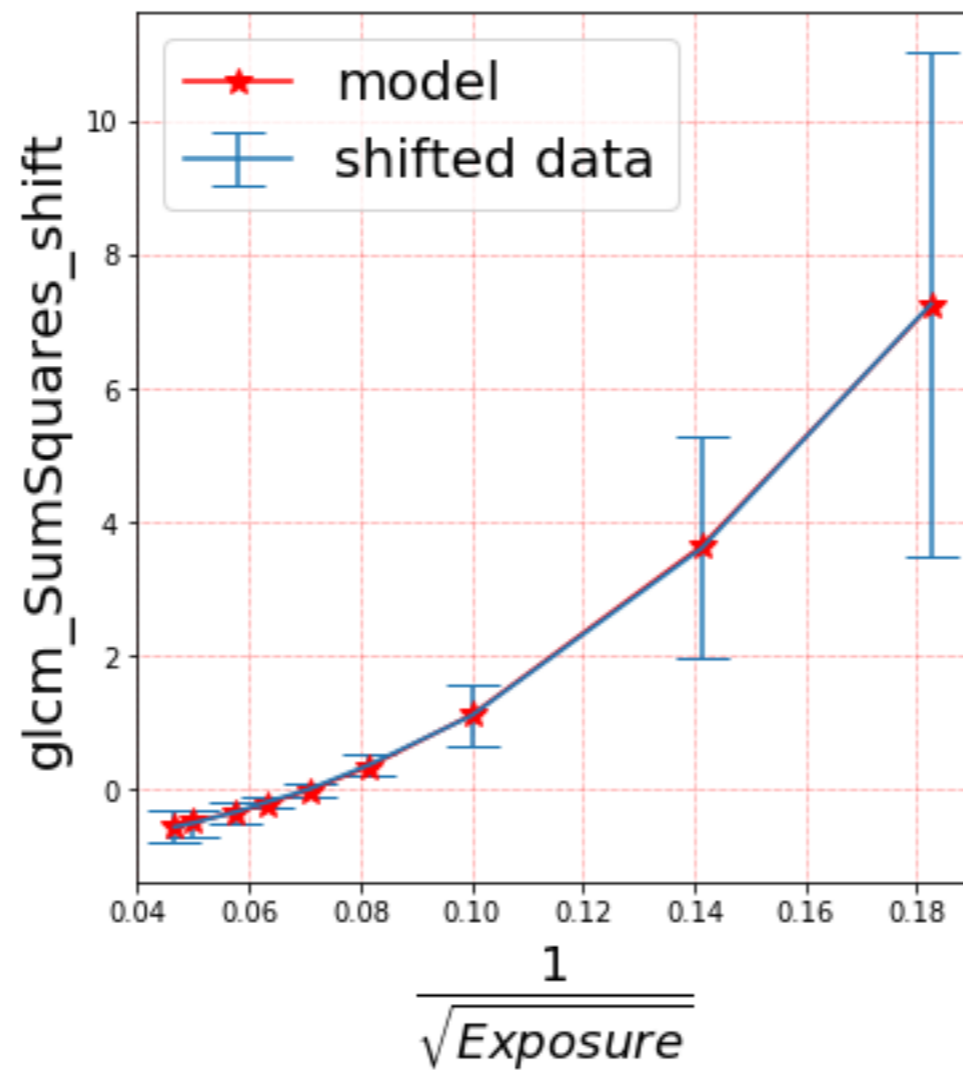

Corrected data

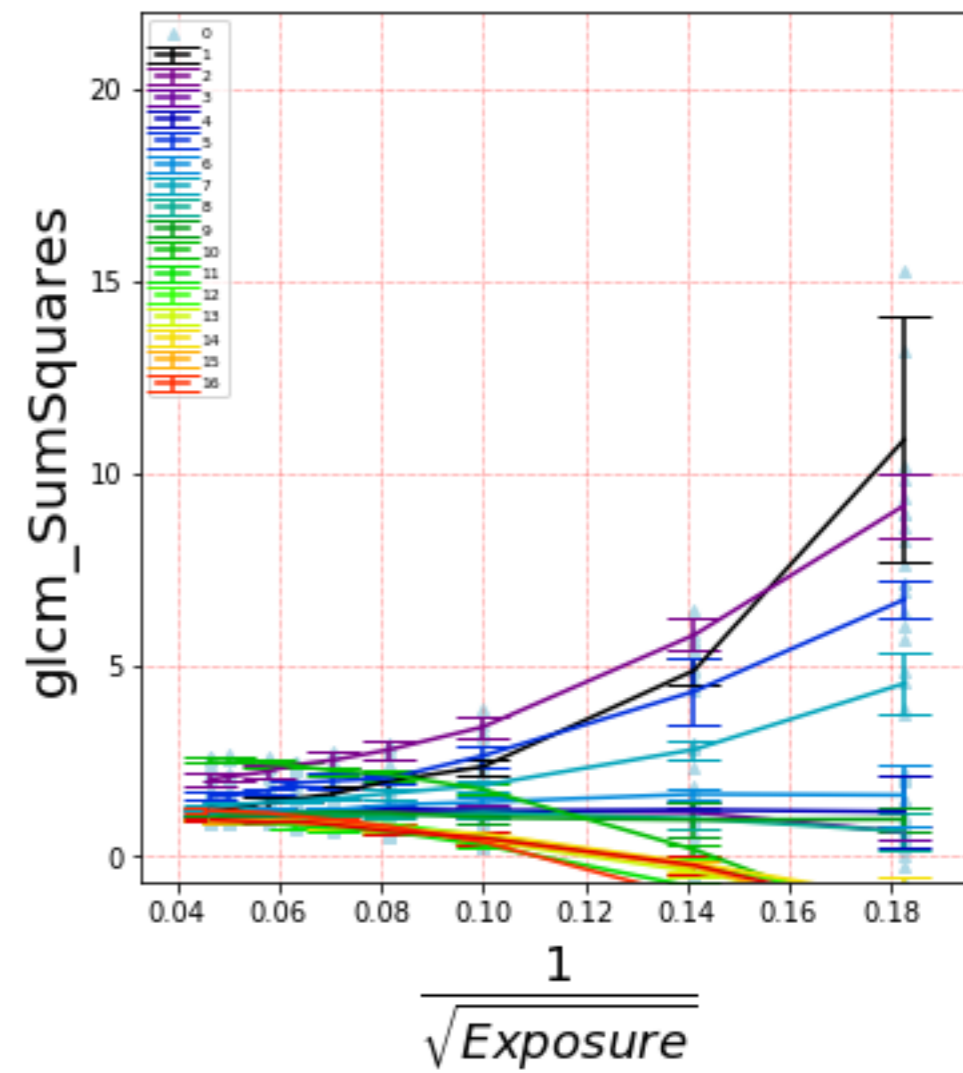

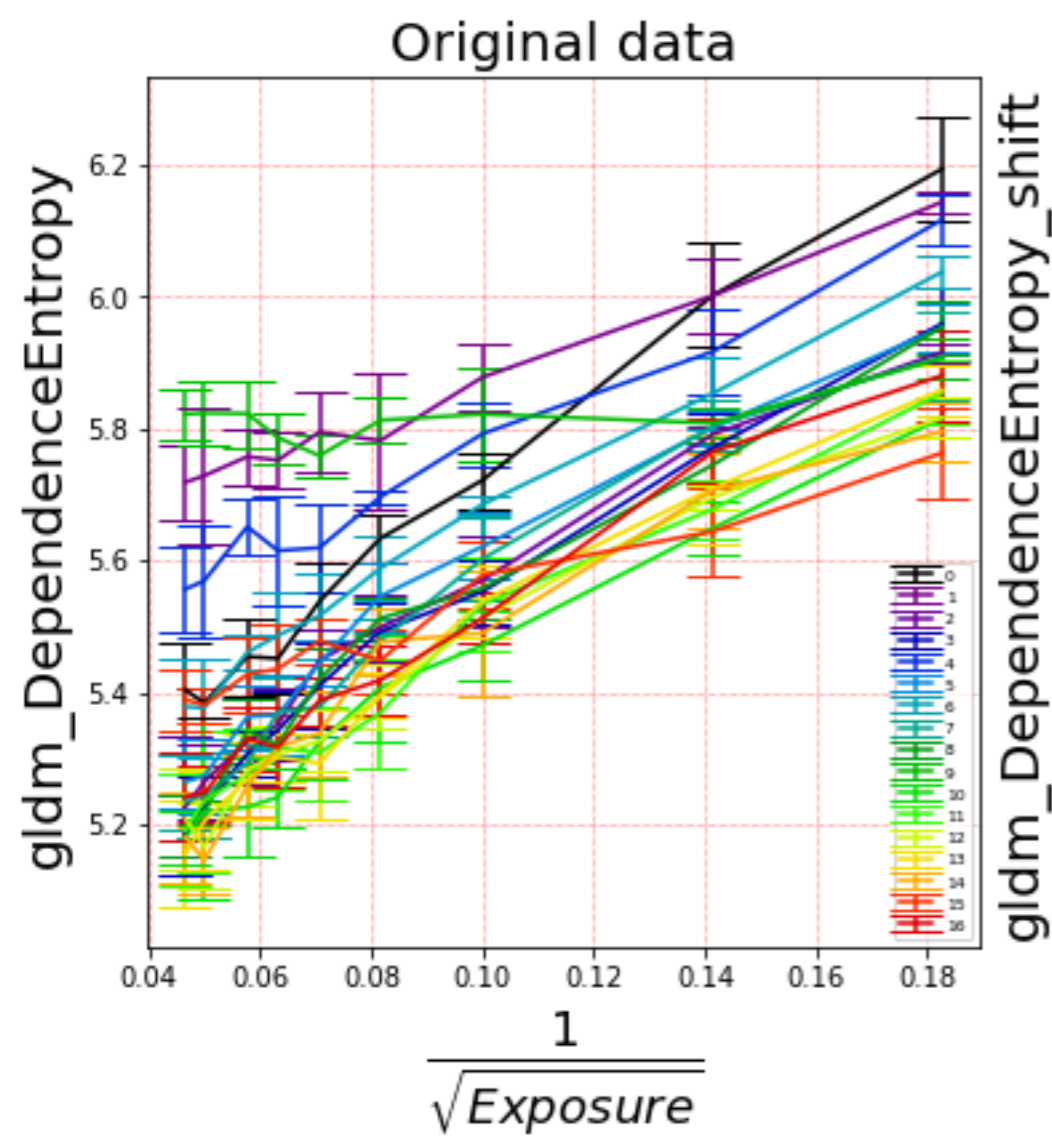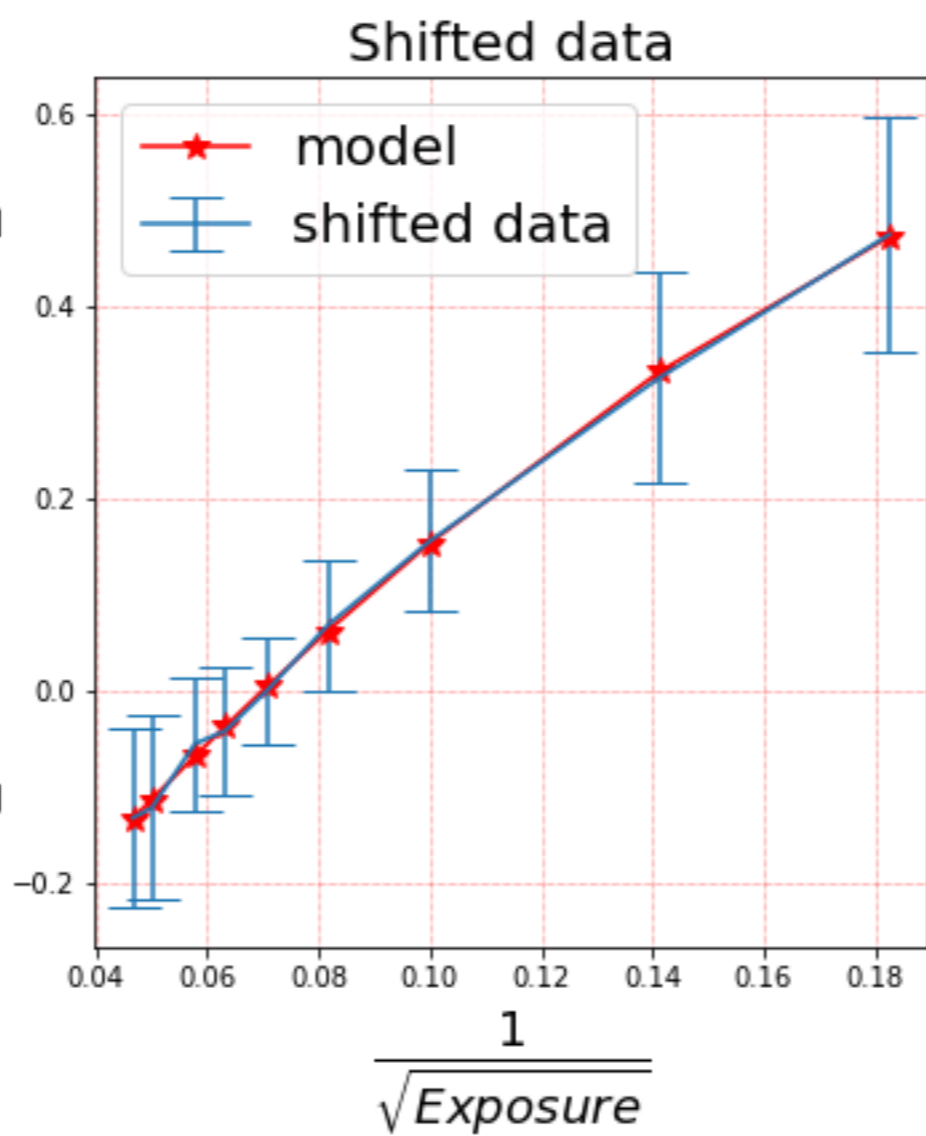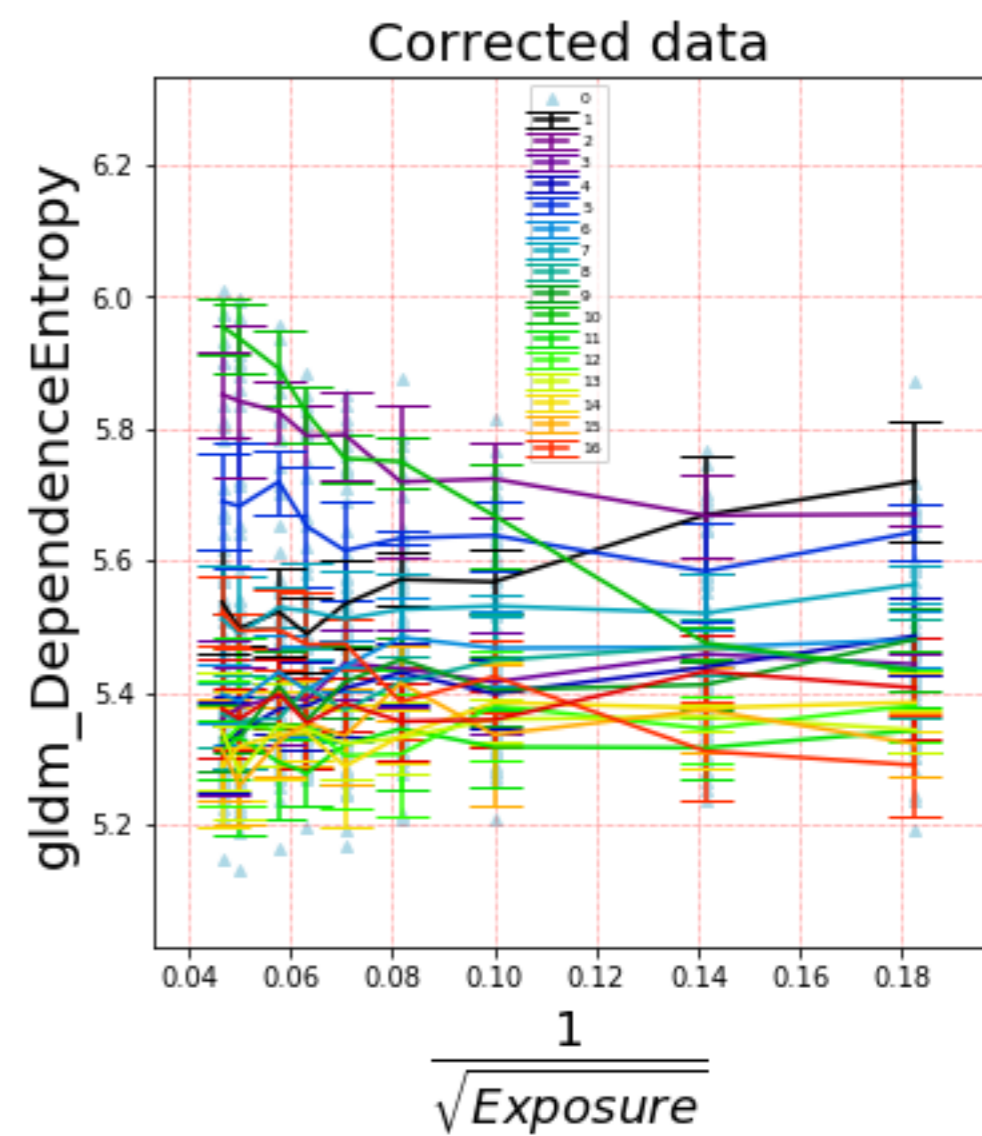



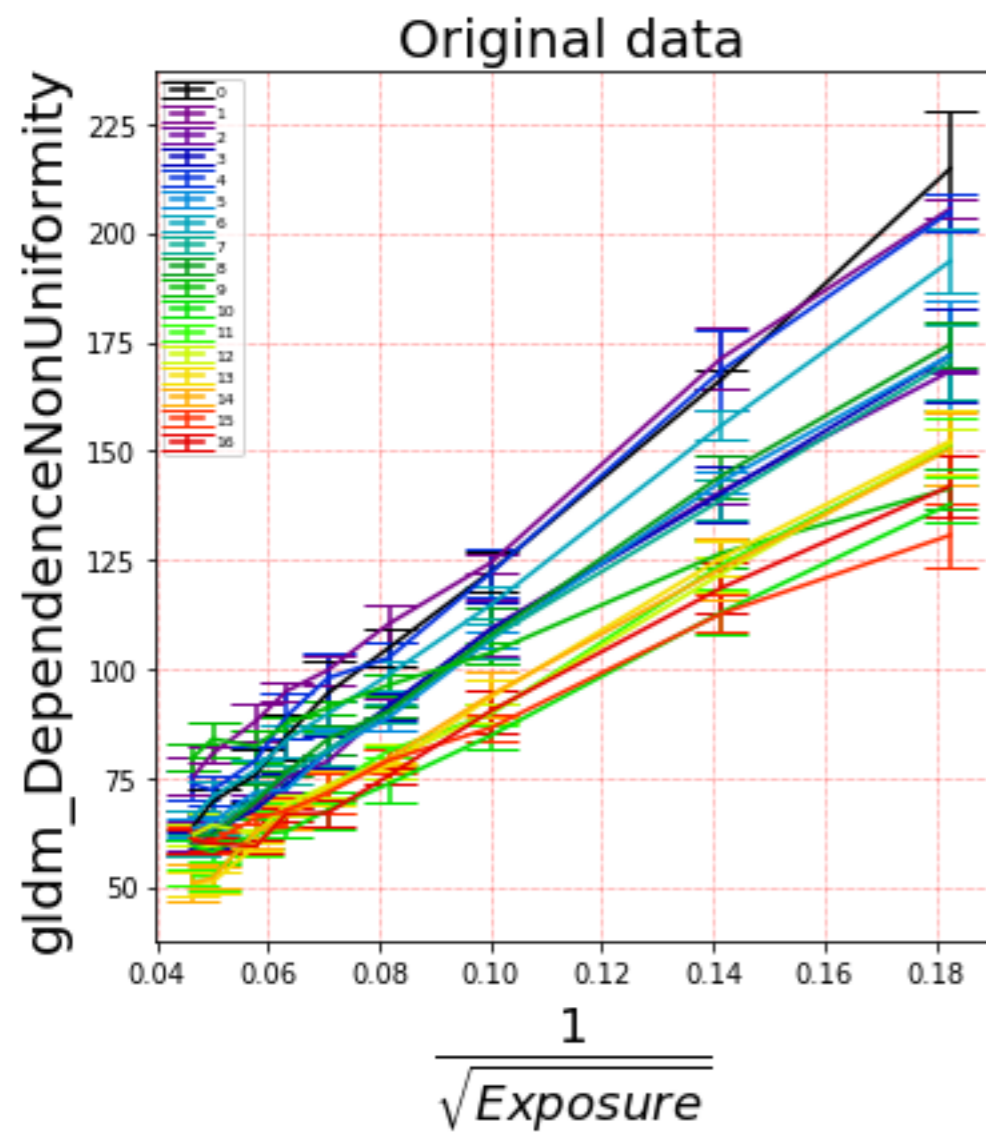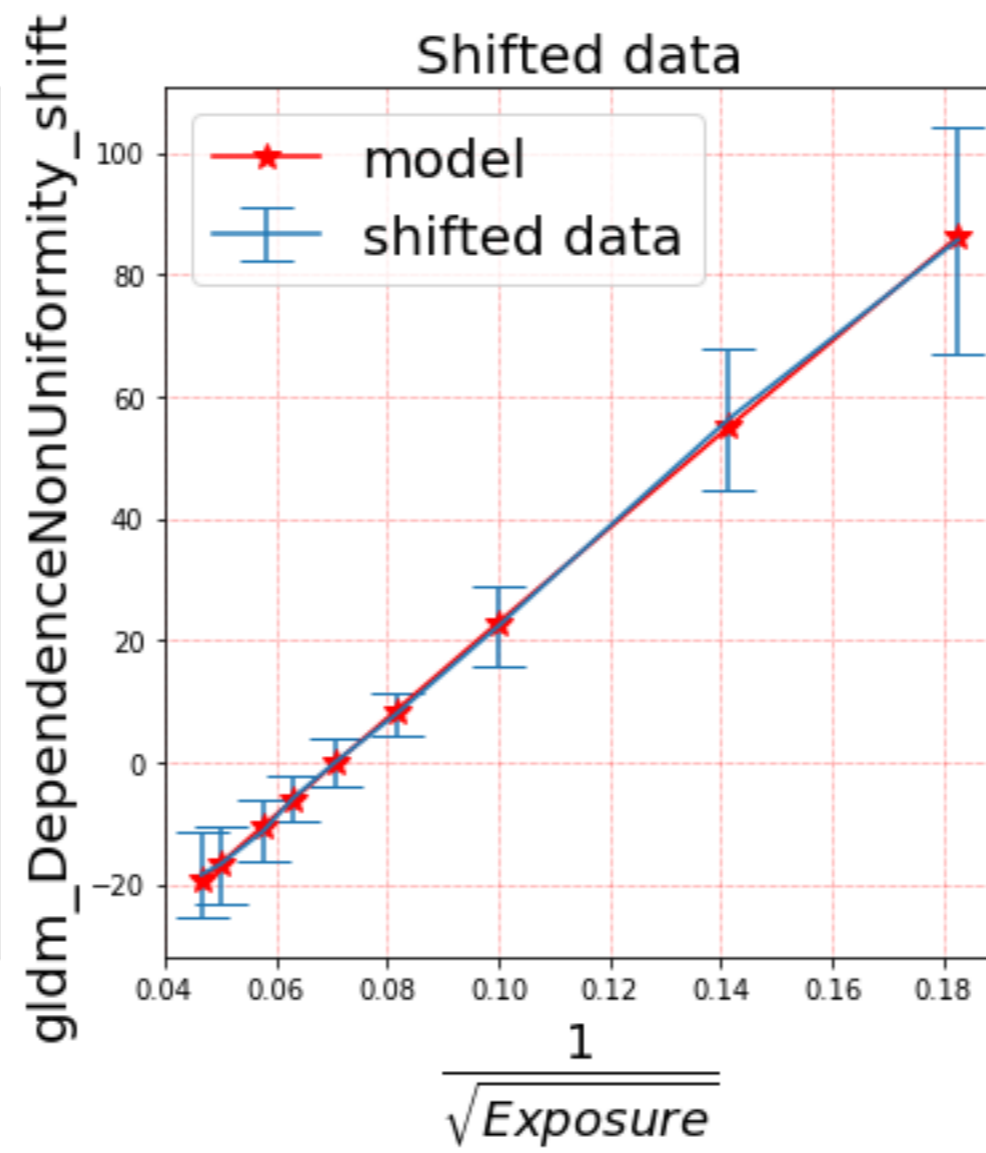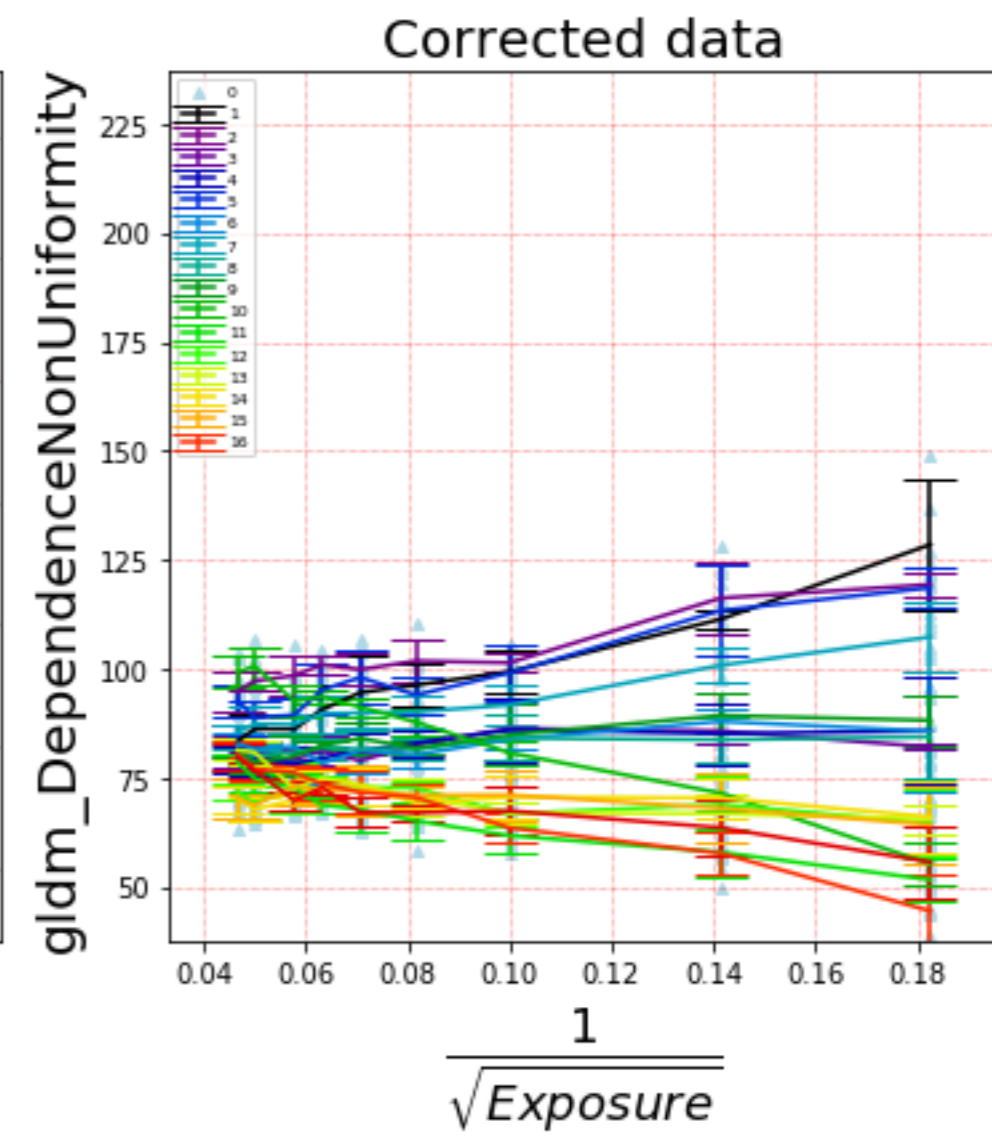



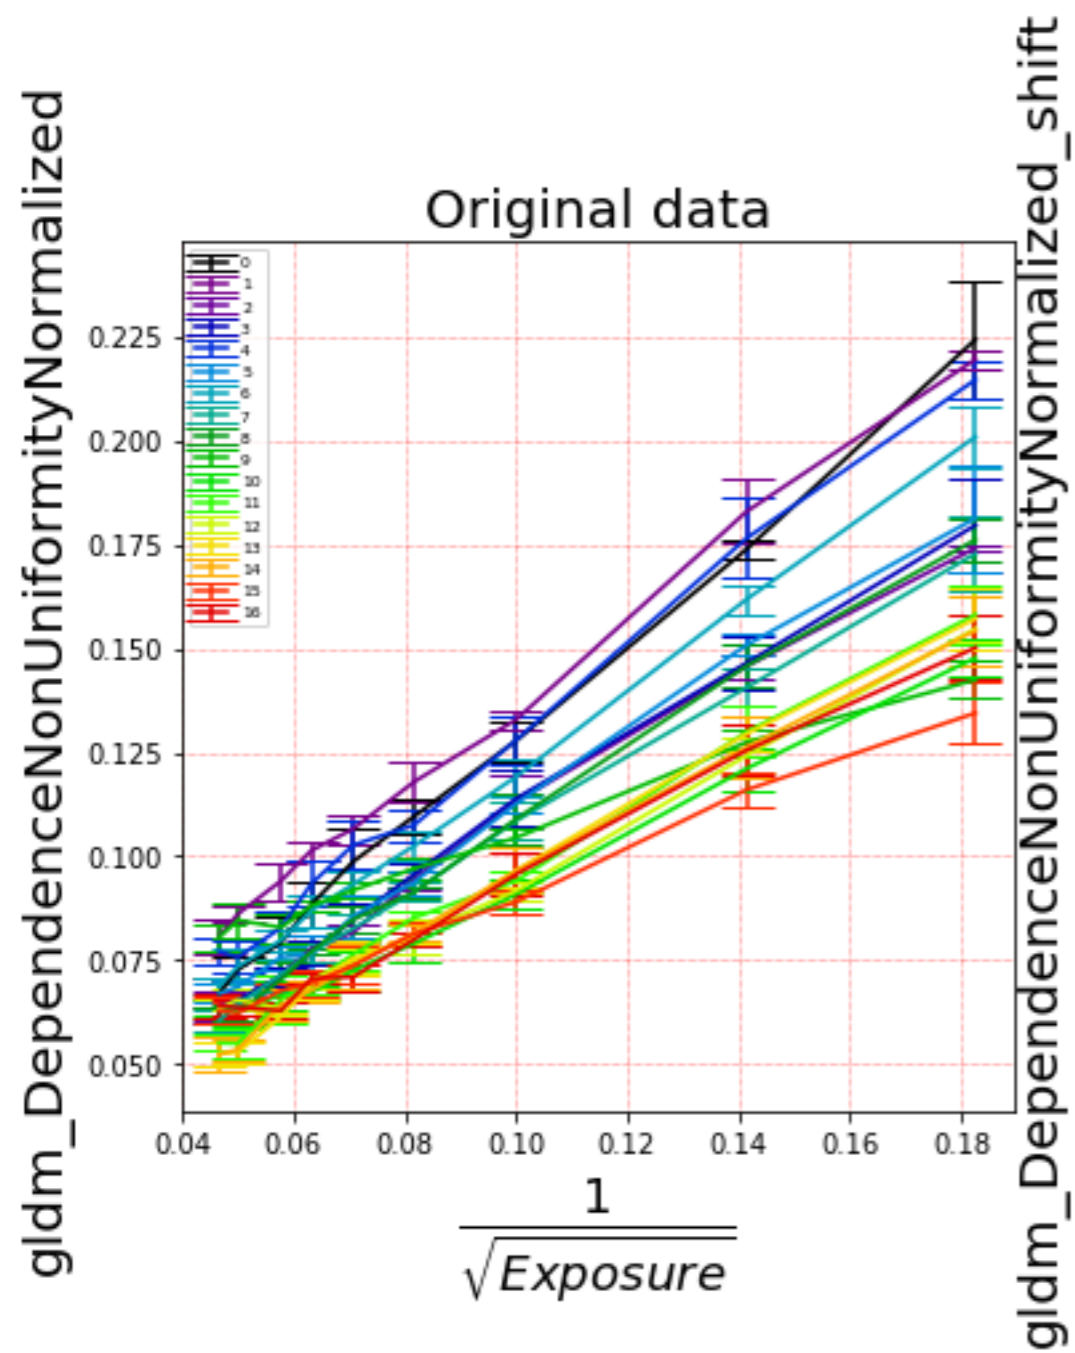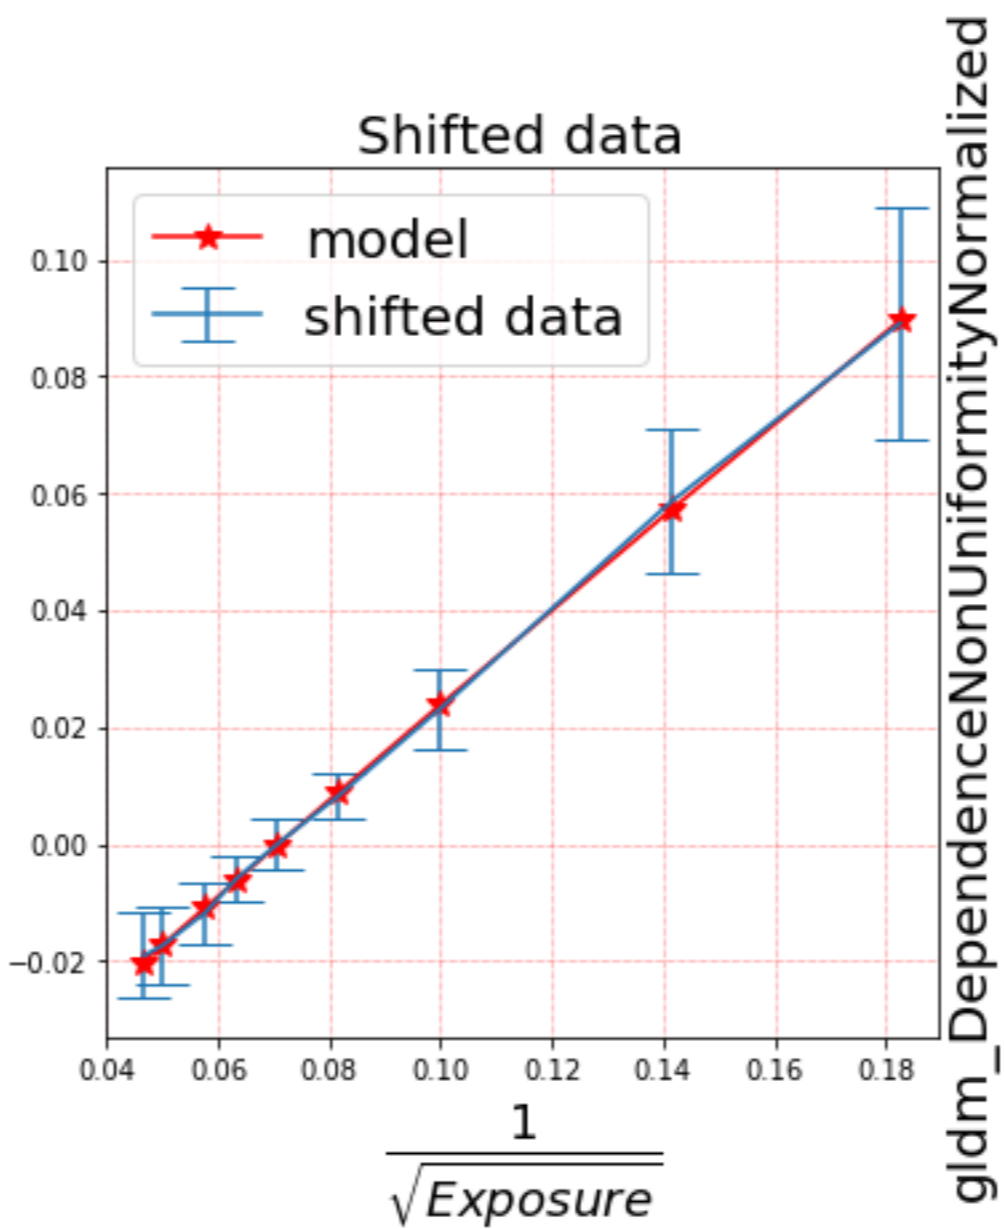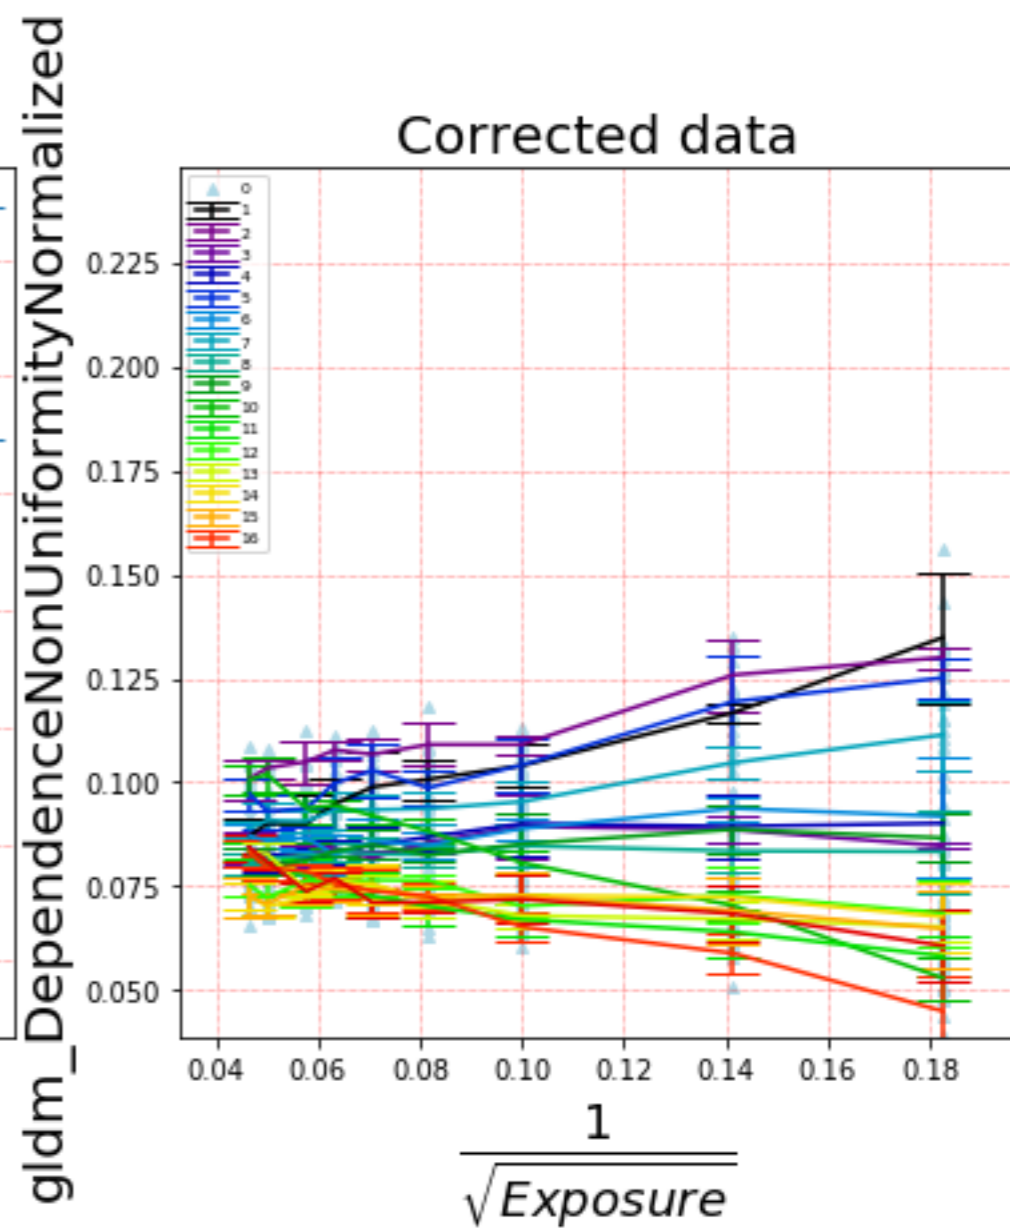

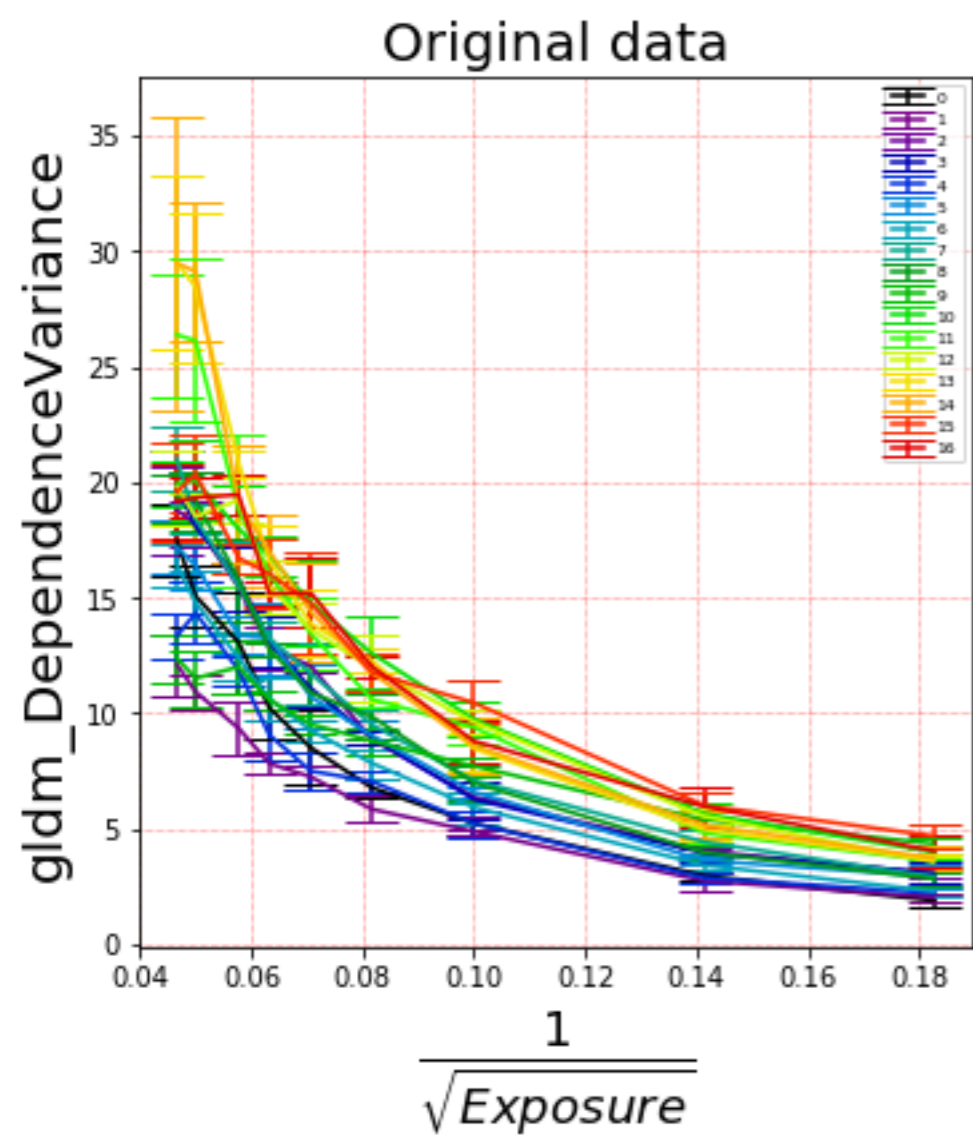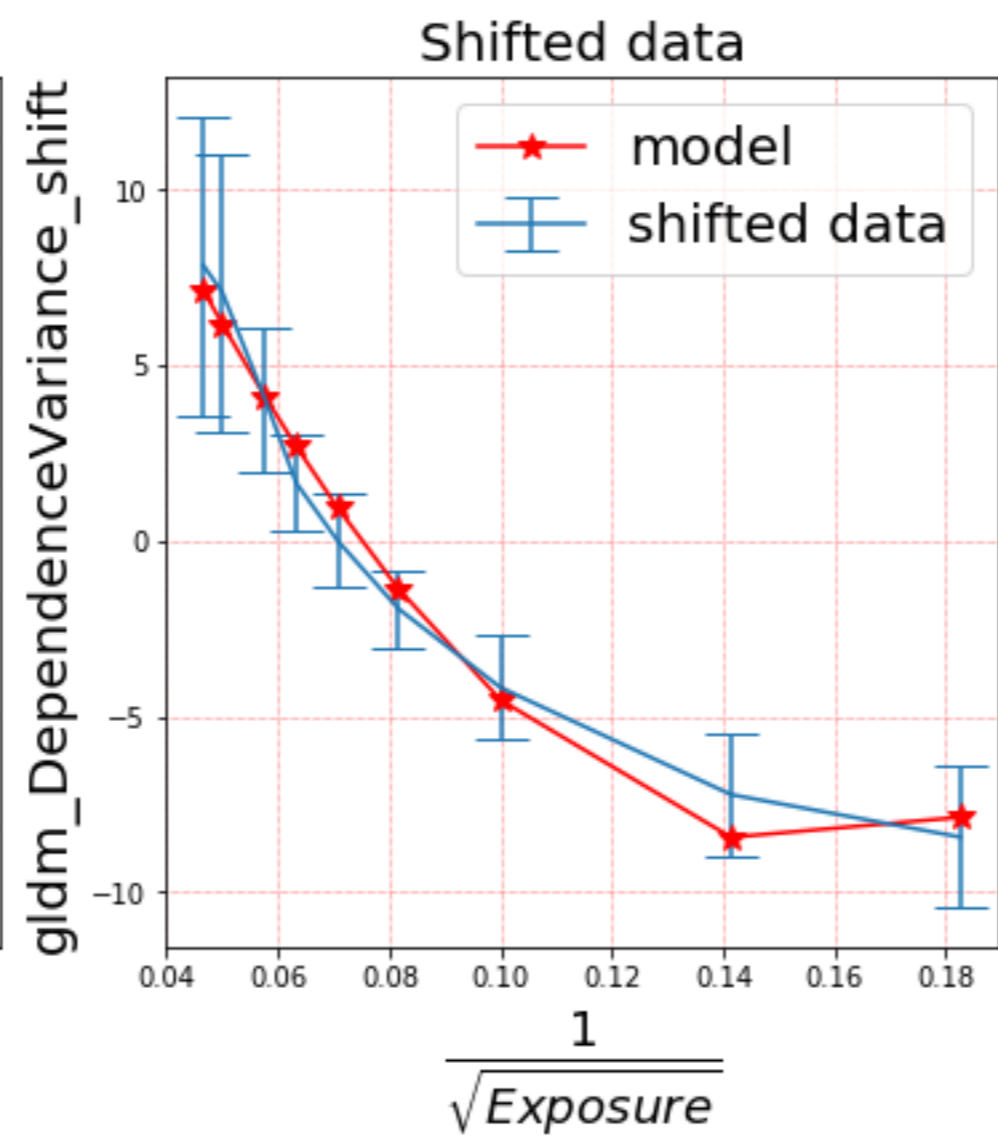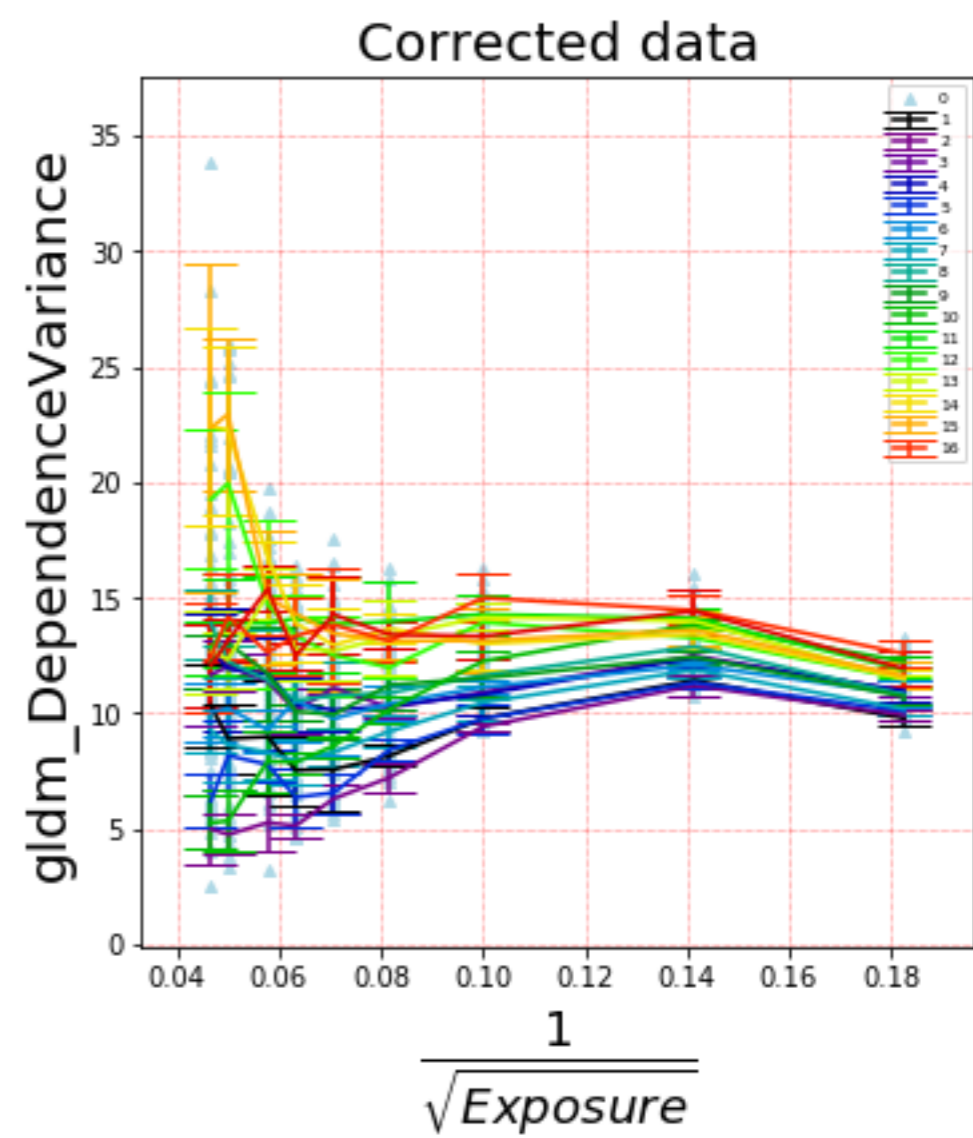

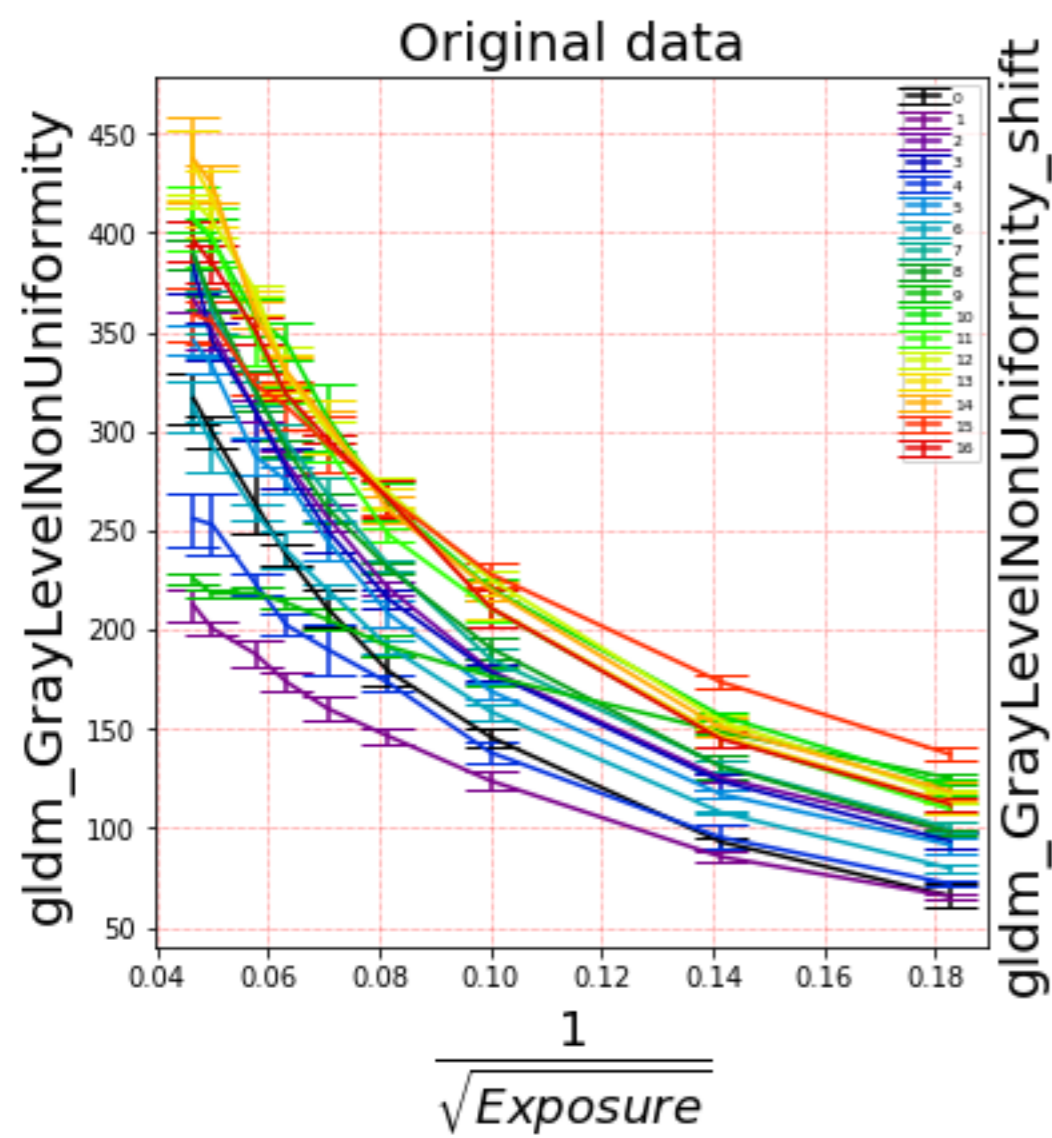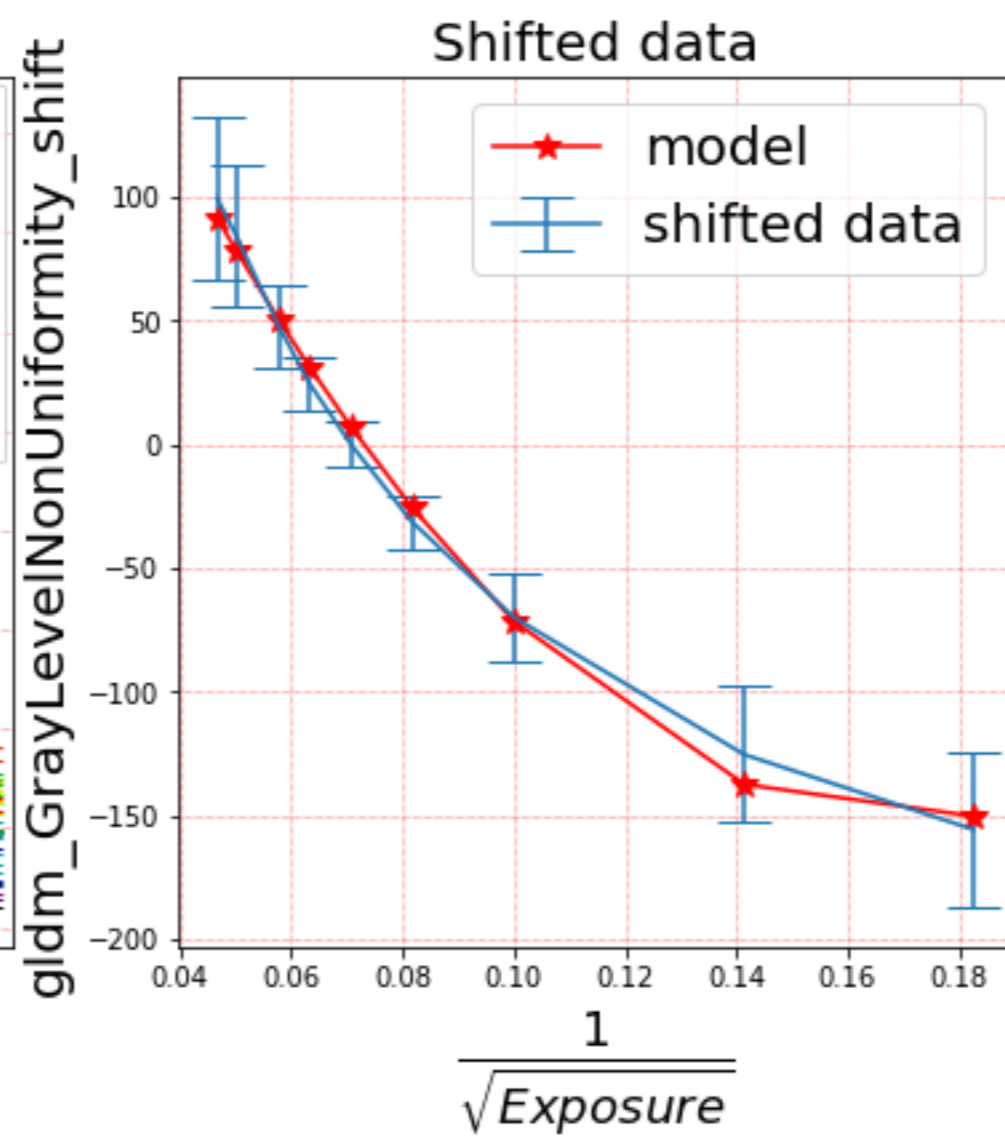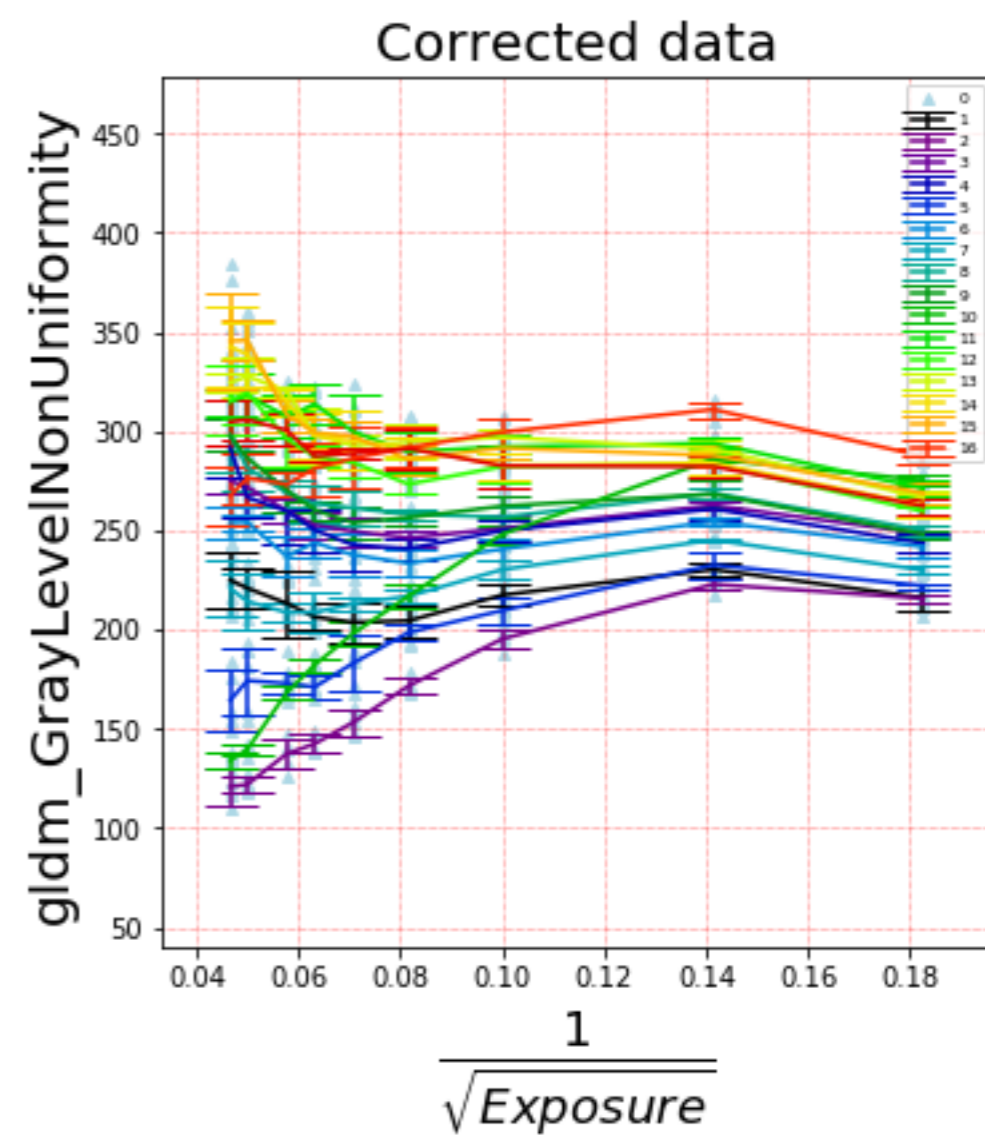

Original data

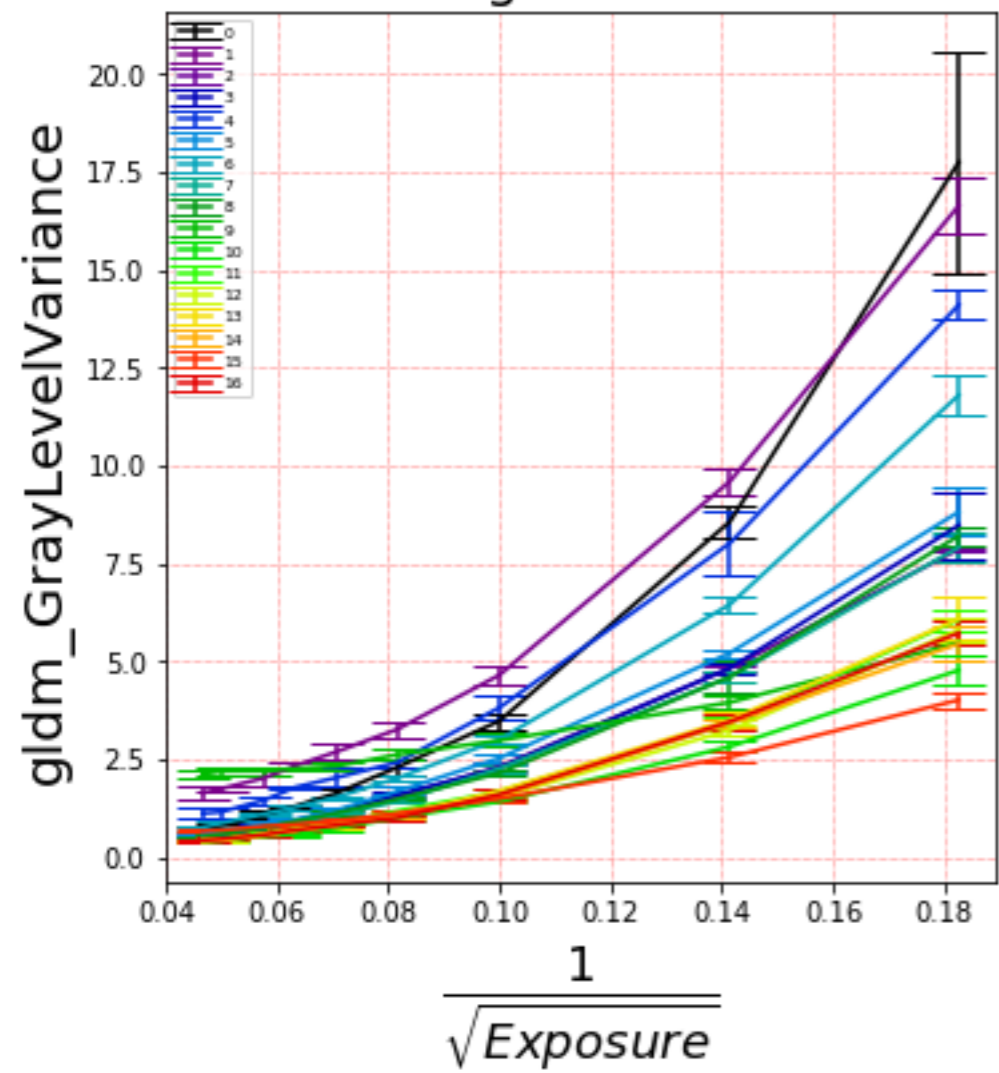

Shifted data

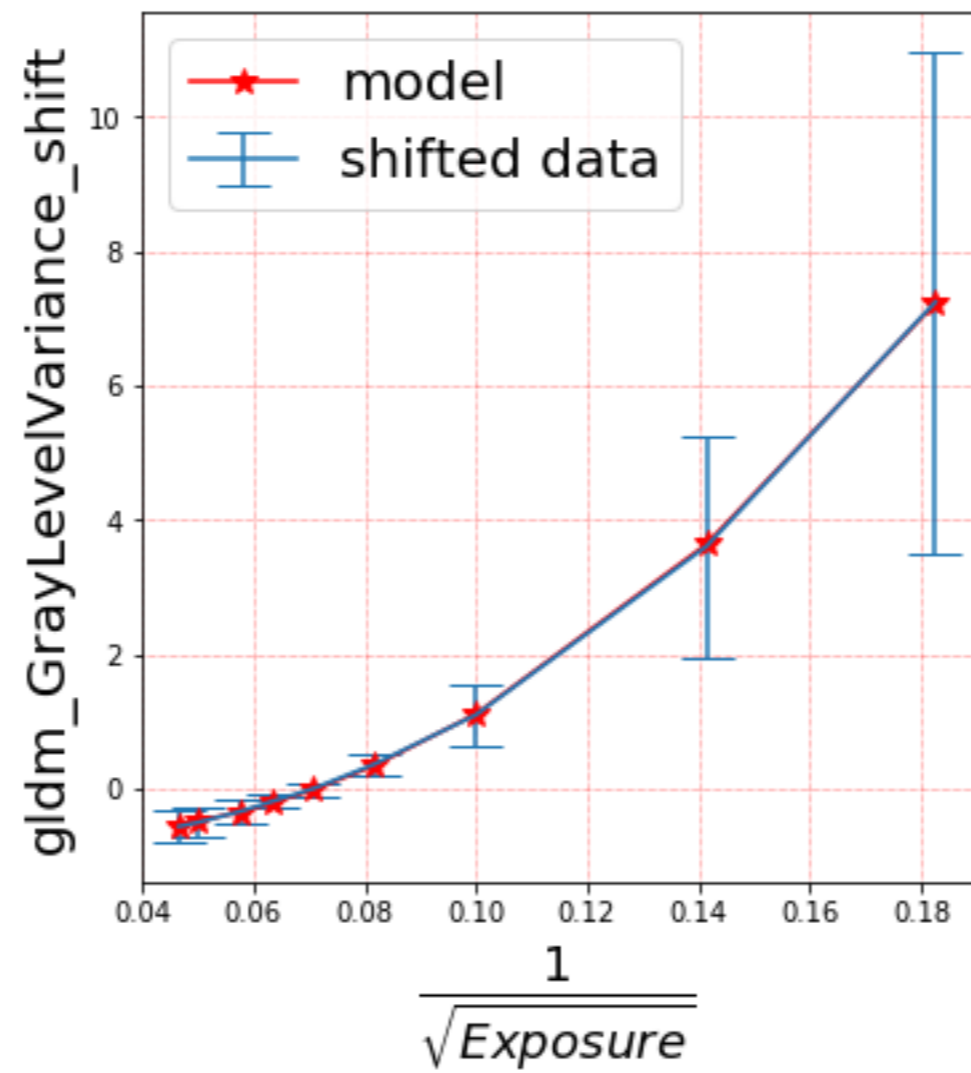

Corrected data

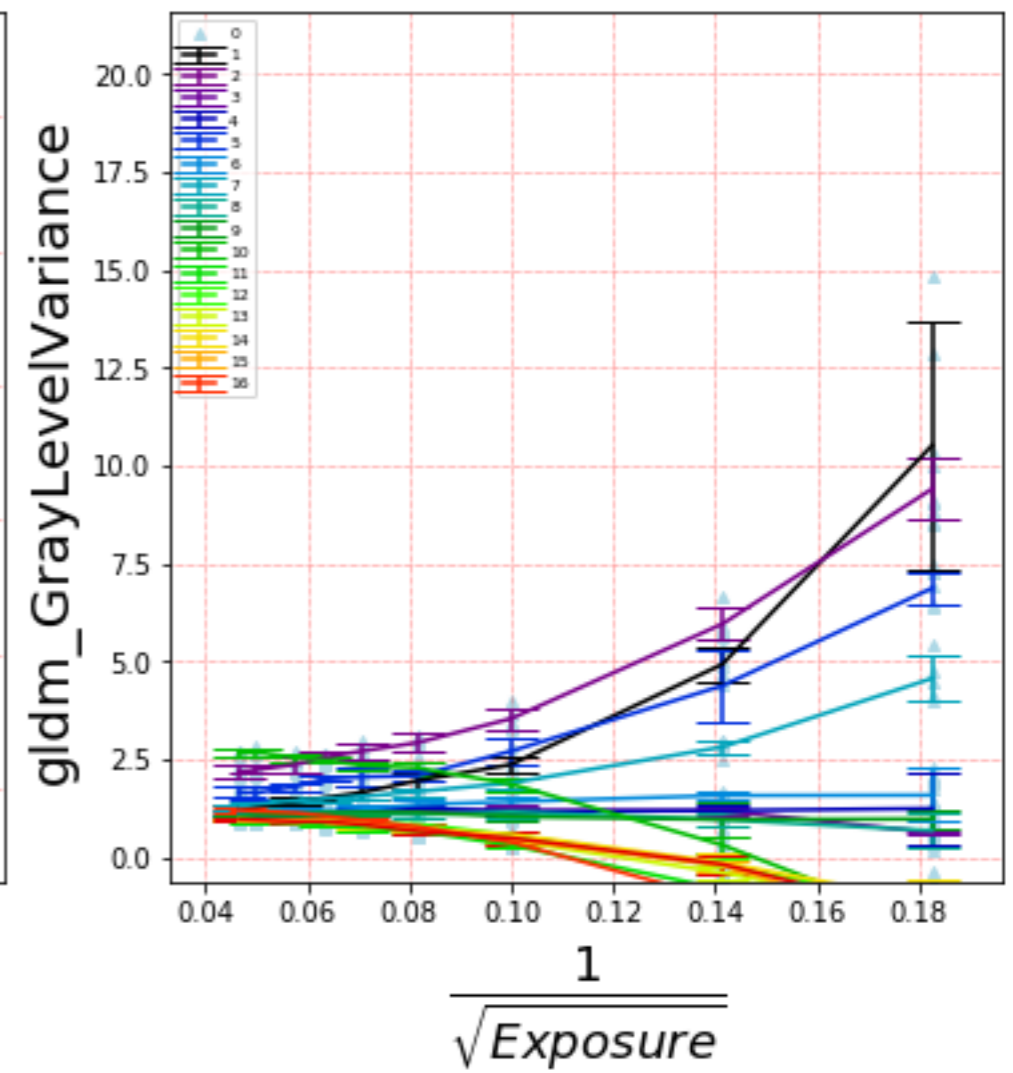



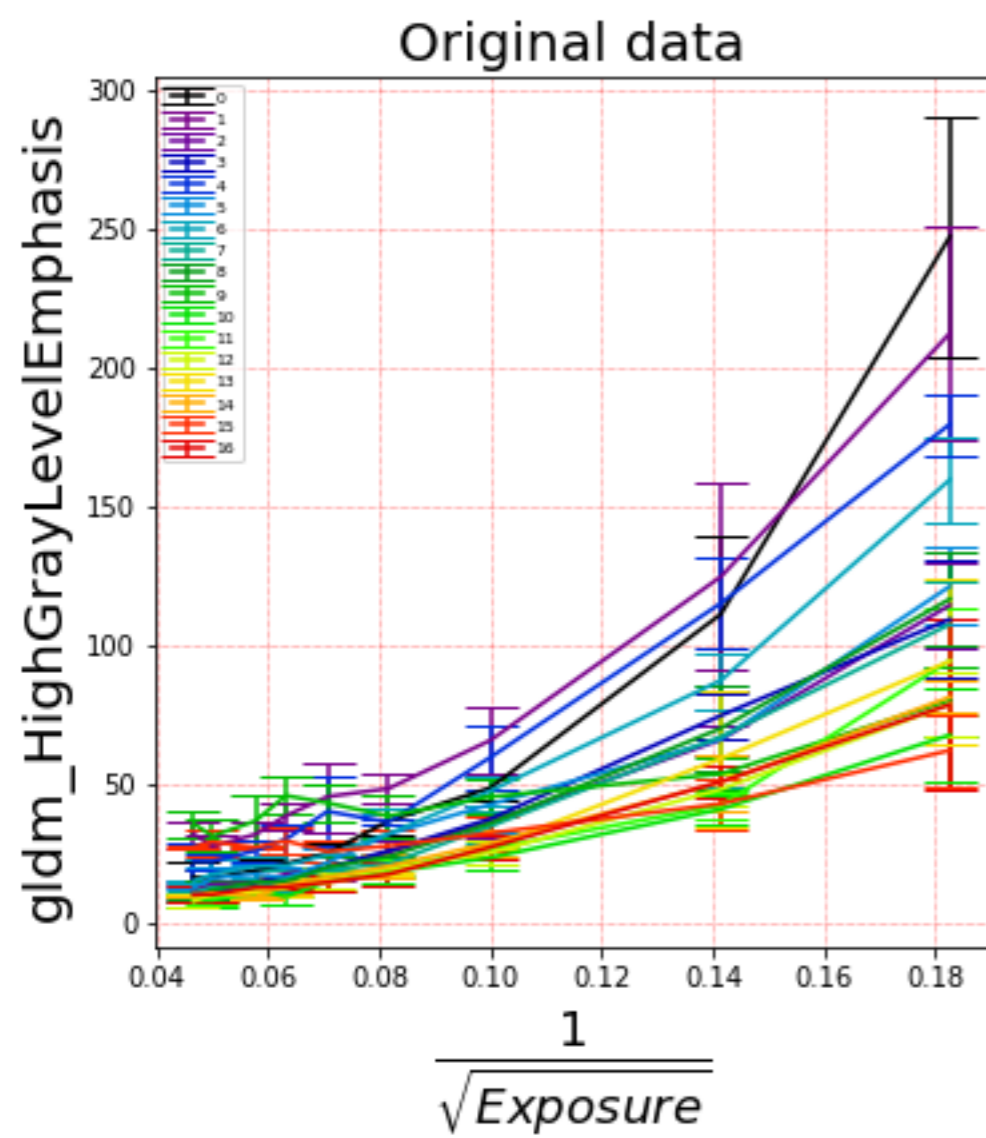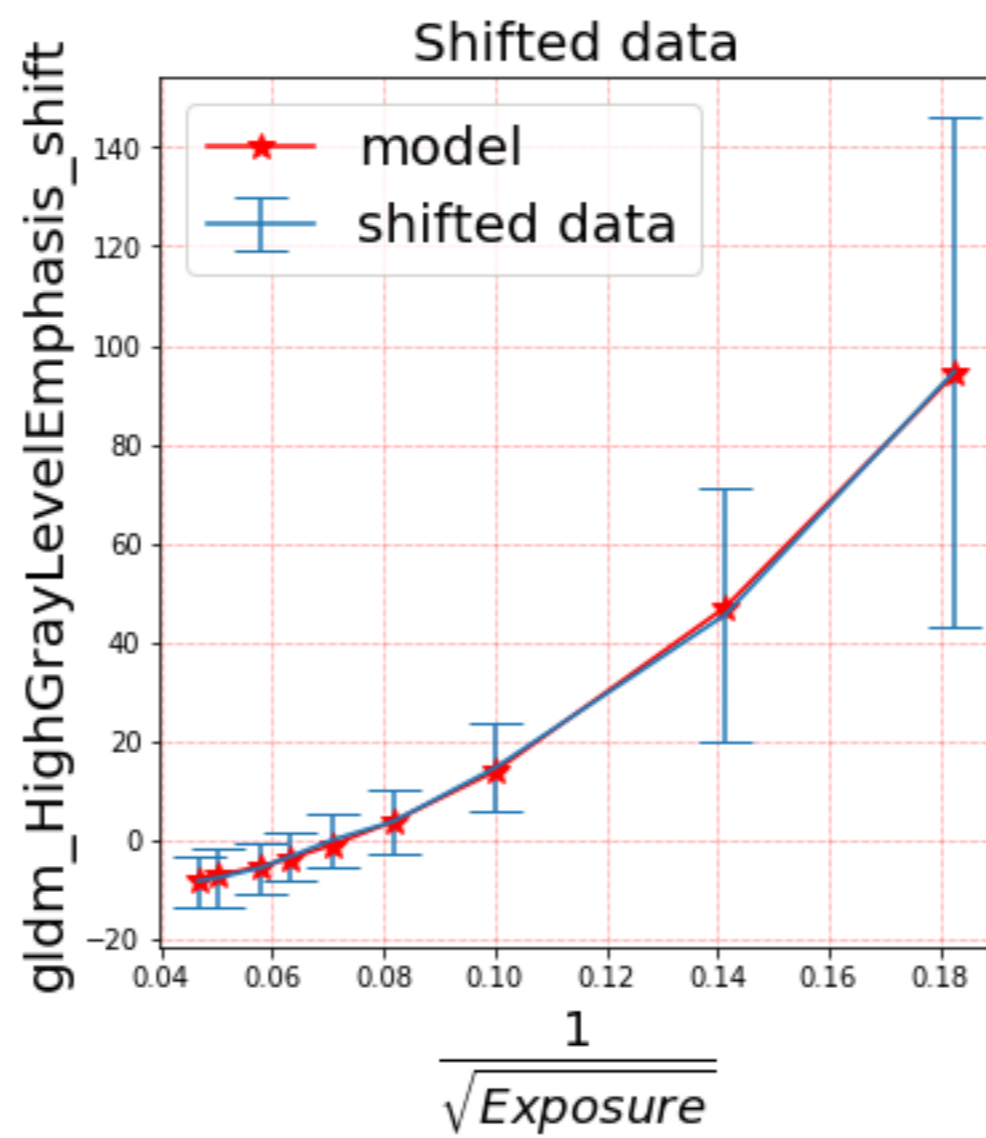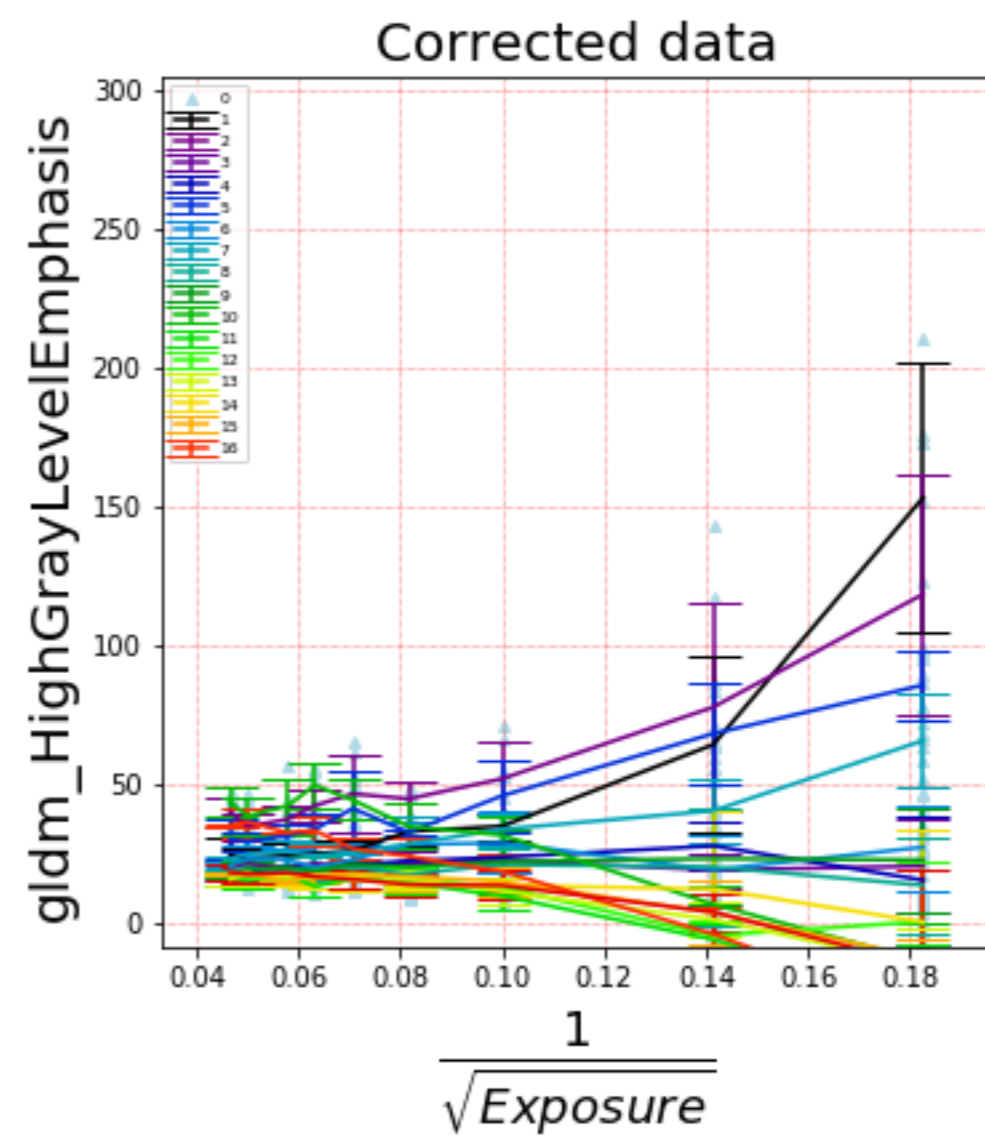



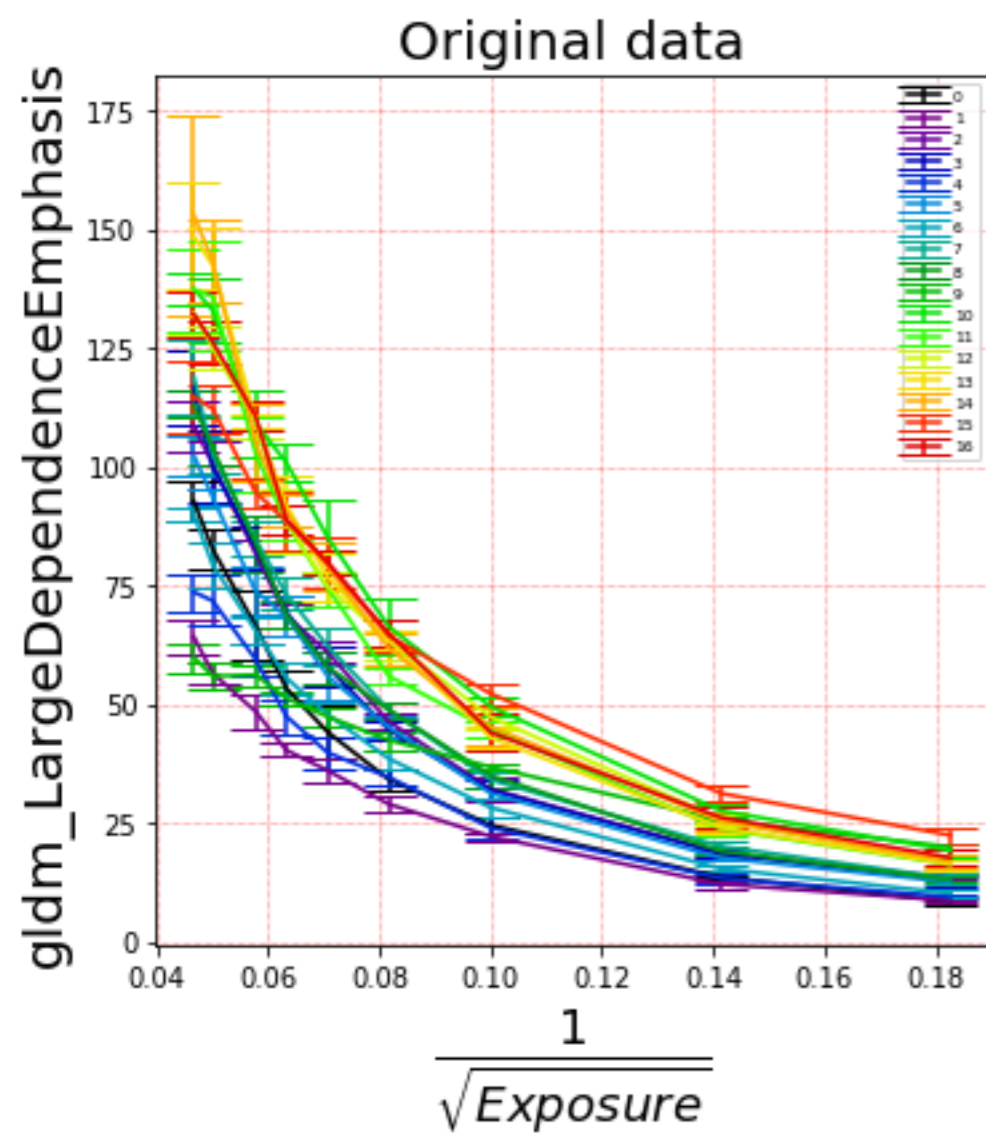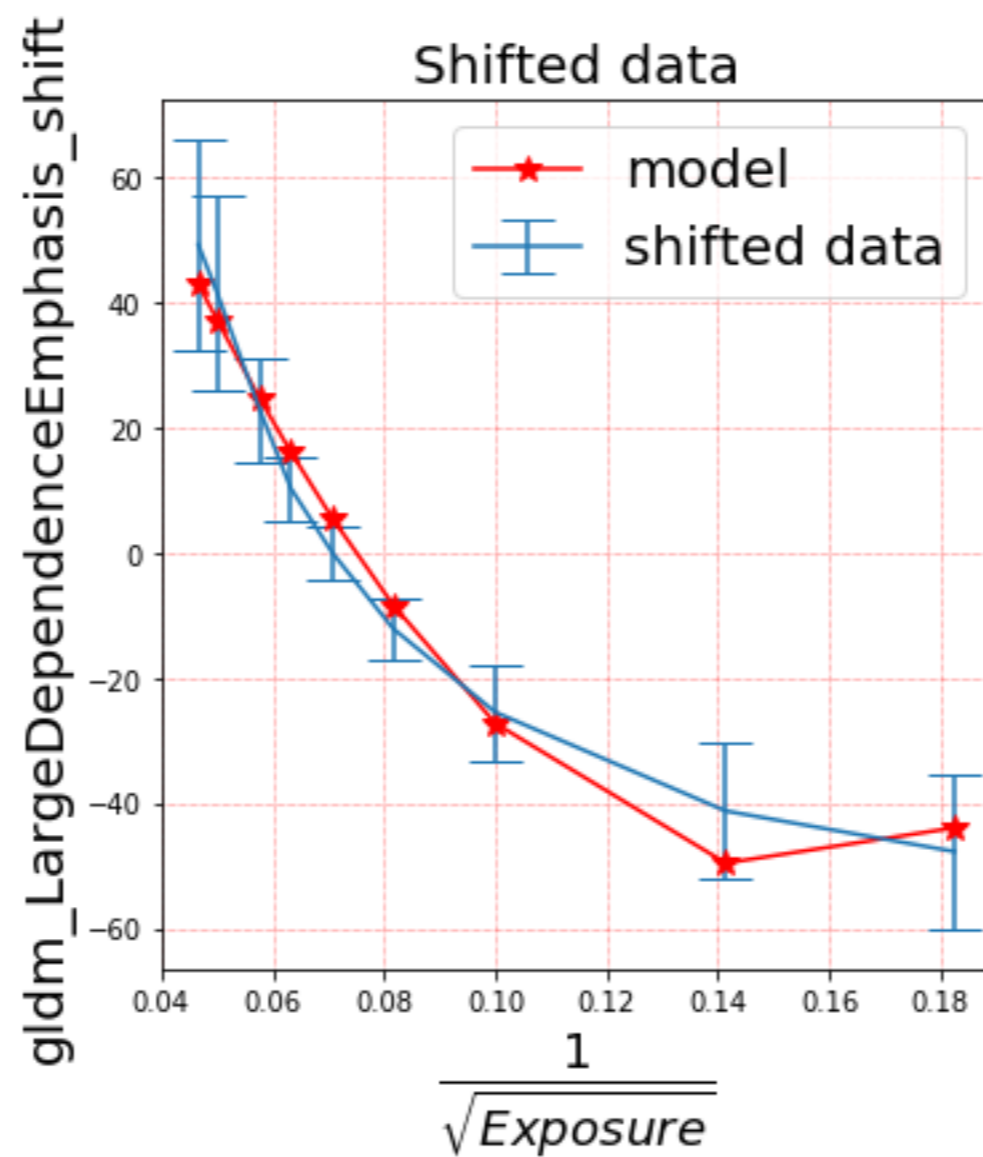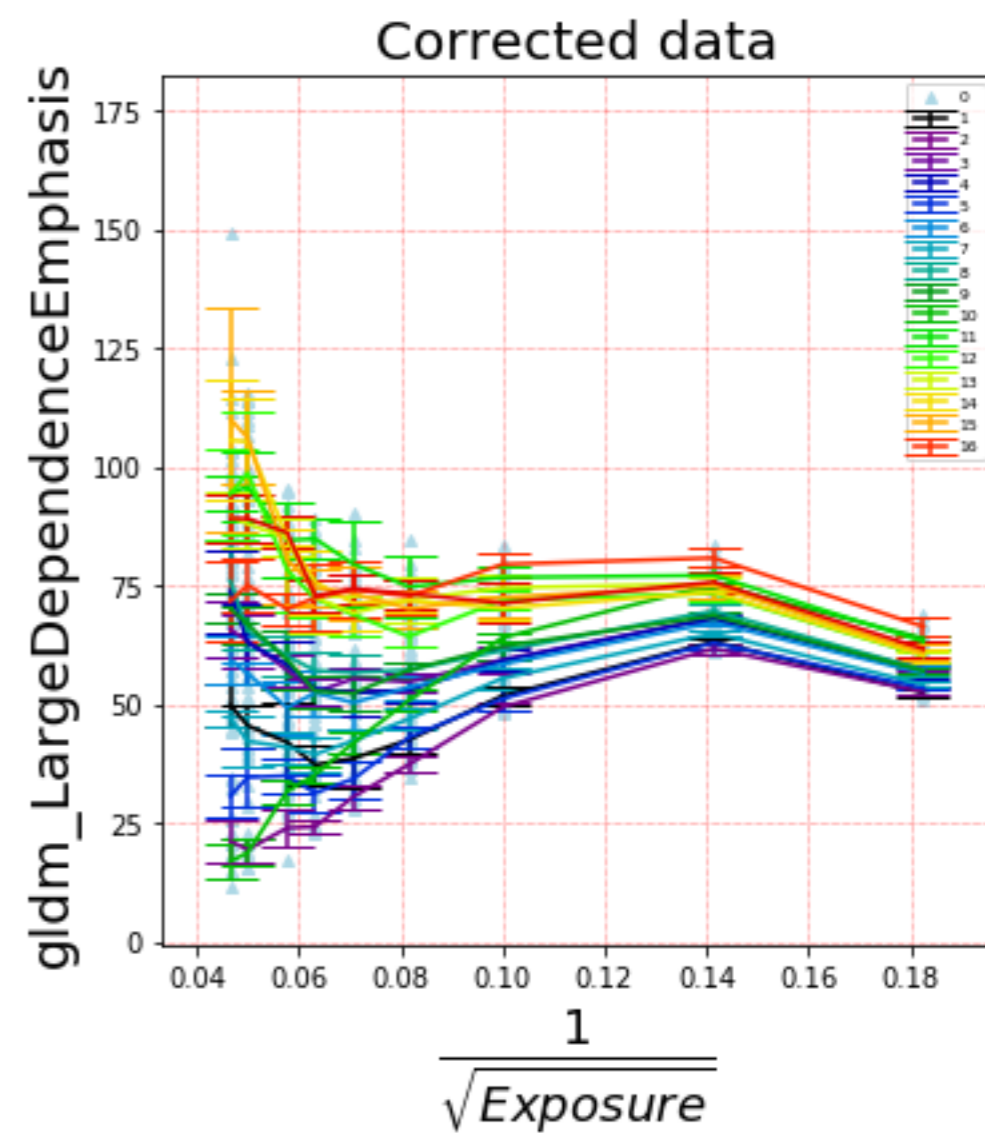

gldm\_LargeDependenceHighGrayLevelEmphasis

Original data

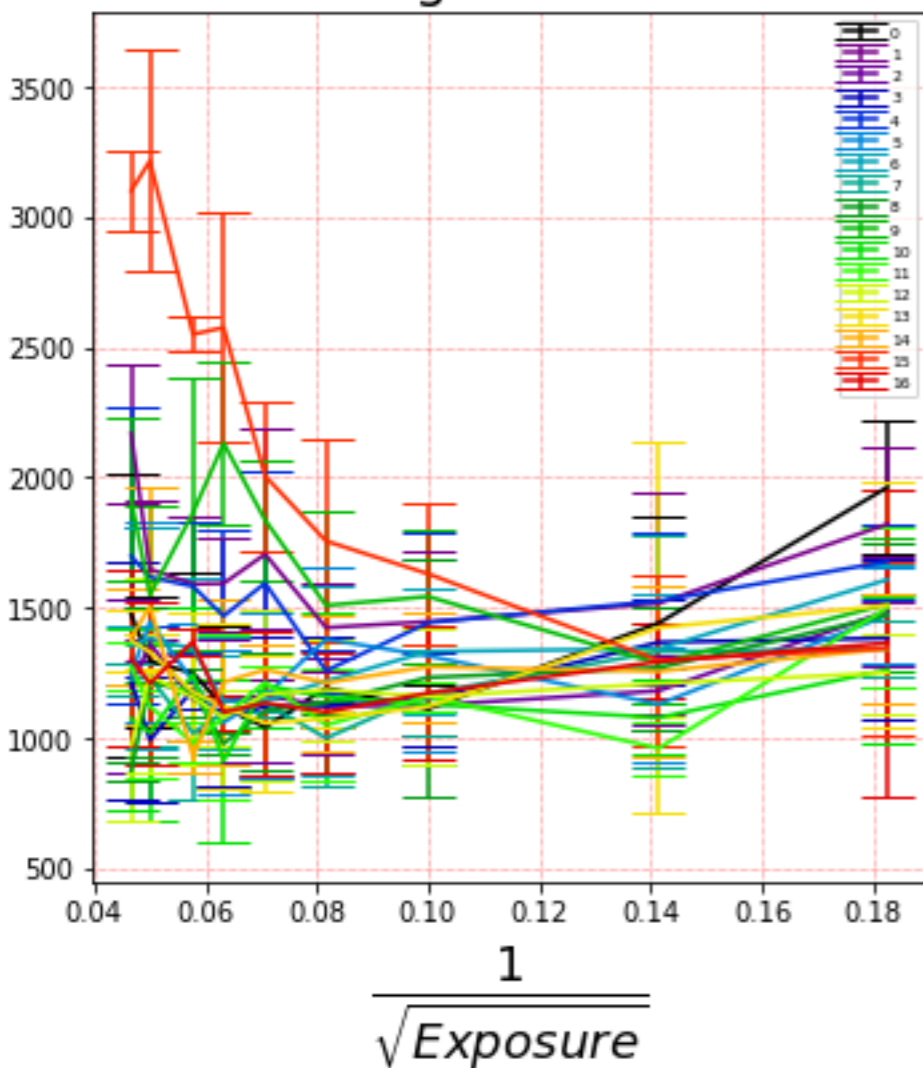

gldm\_LargeDependenceHighGrayLevelEmphasis\_shift

Shifted data

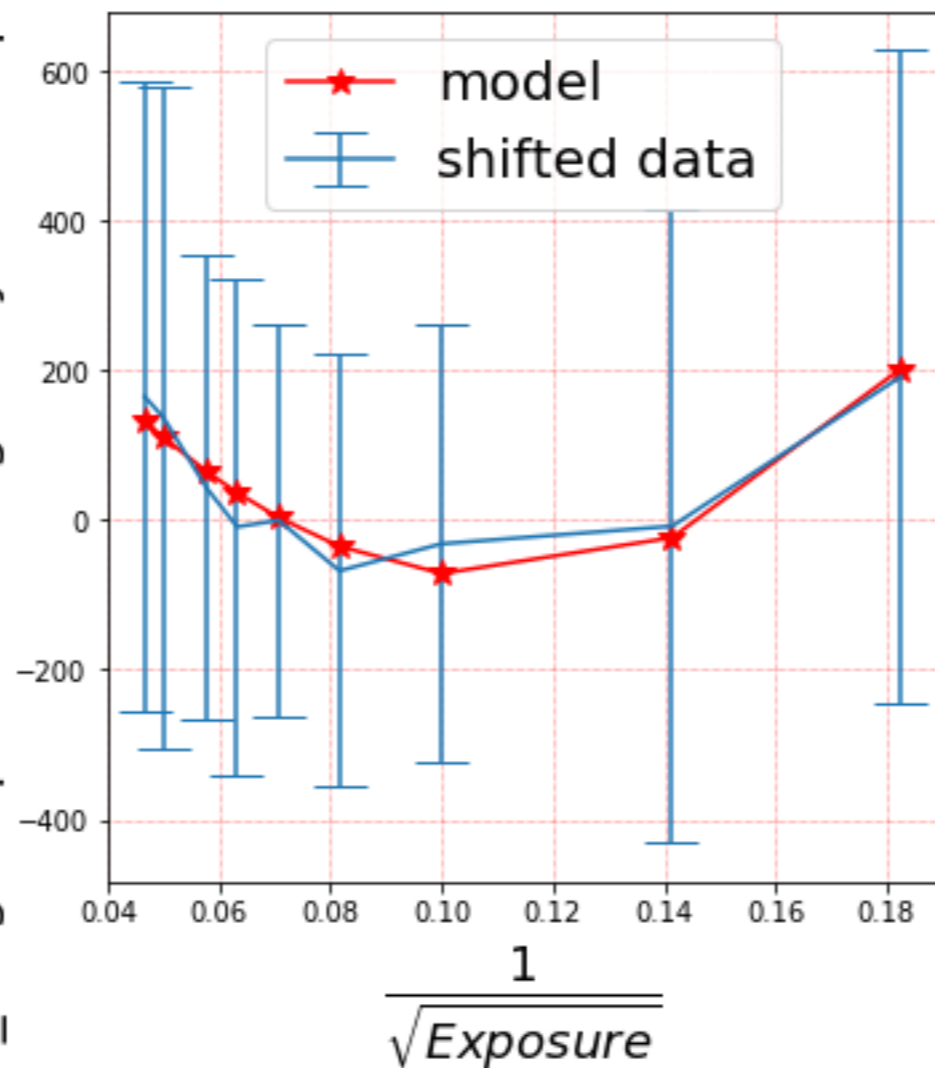

gldm\_LargeDependenceHighGrayLevelEmphasis

Corrected data

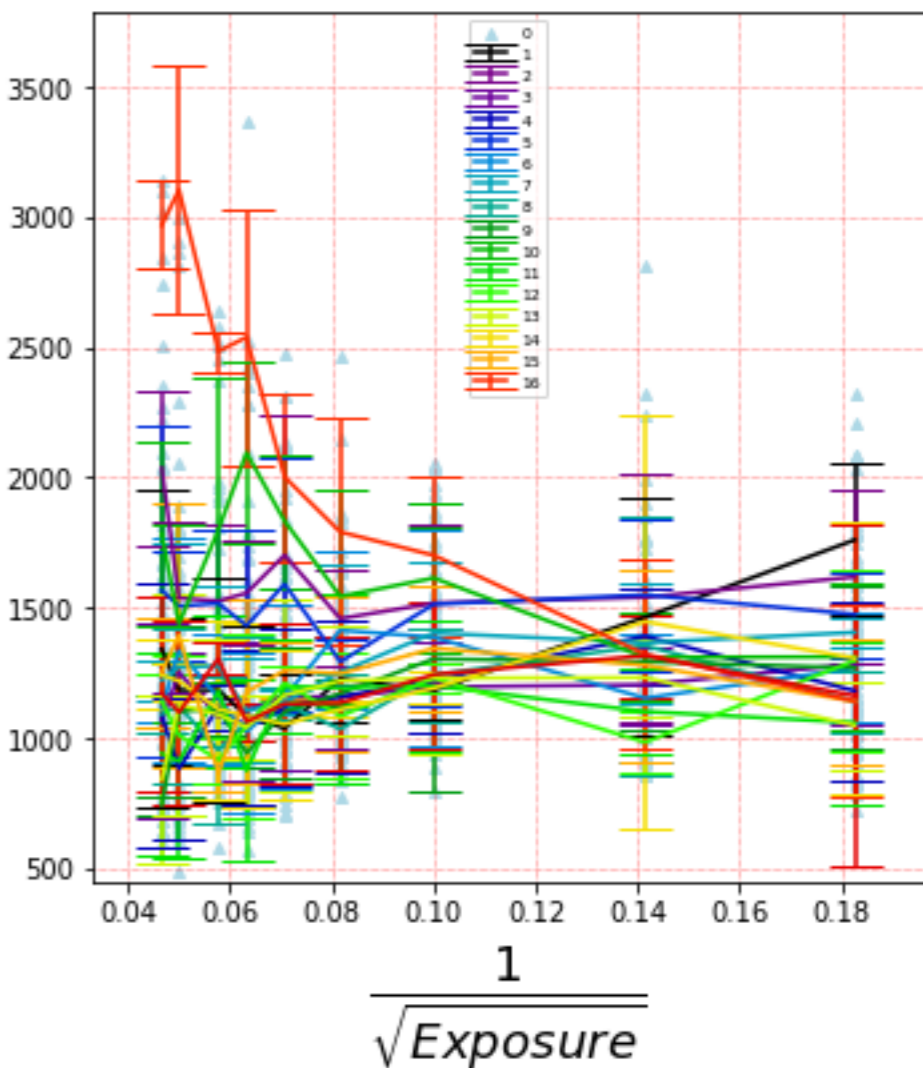

gldm\_LargeDependenceLowGrayLevelEmphasis

Original data

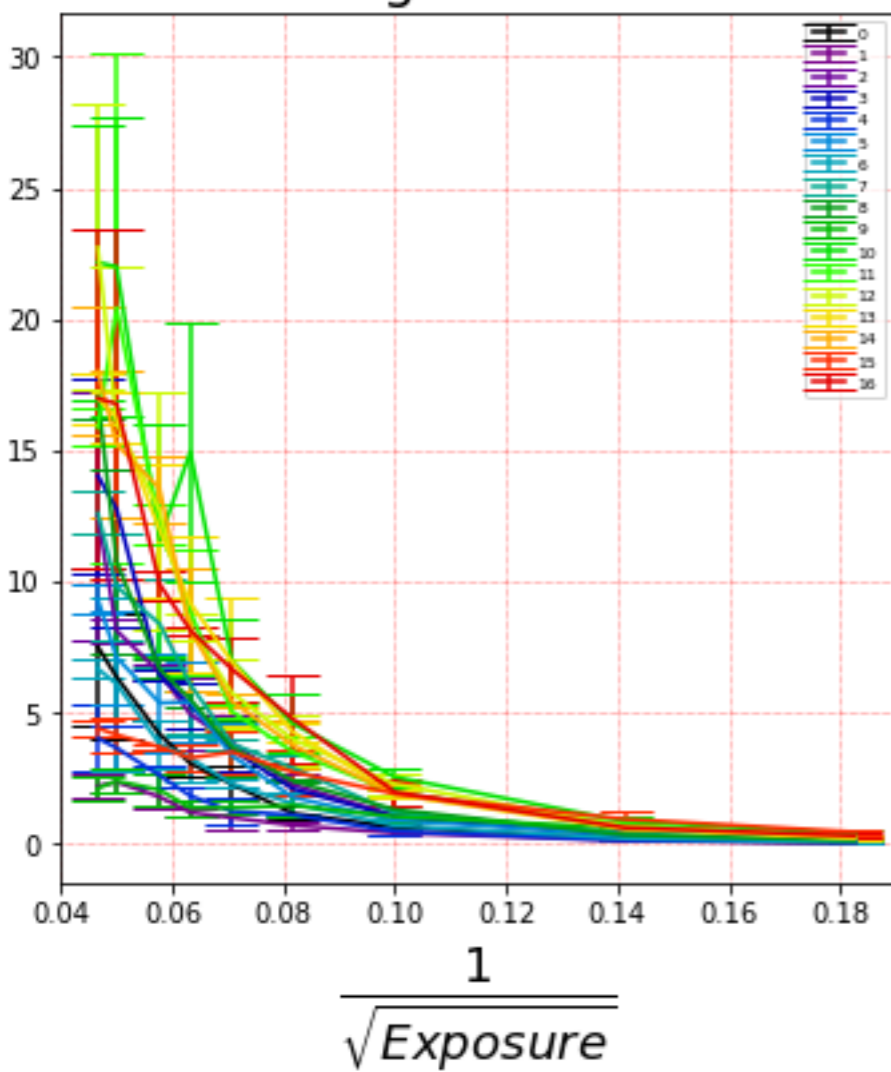

gldm\_LargeDependenceLowGrayLevelEmphasis\_shift

Shifted data

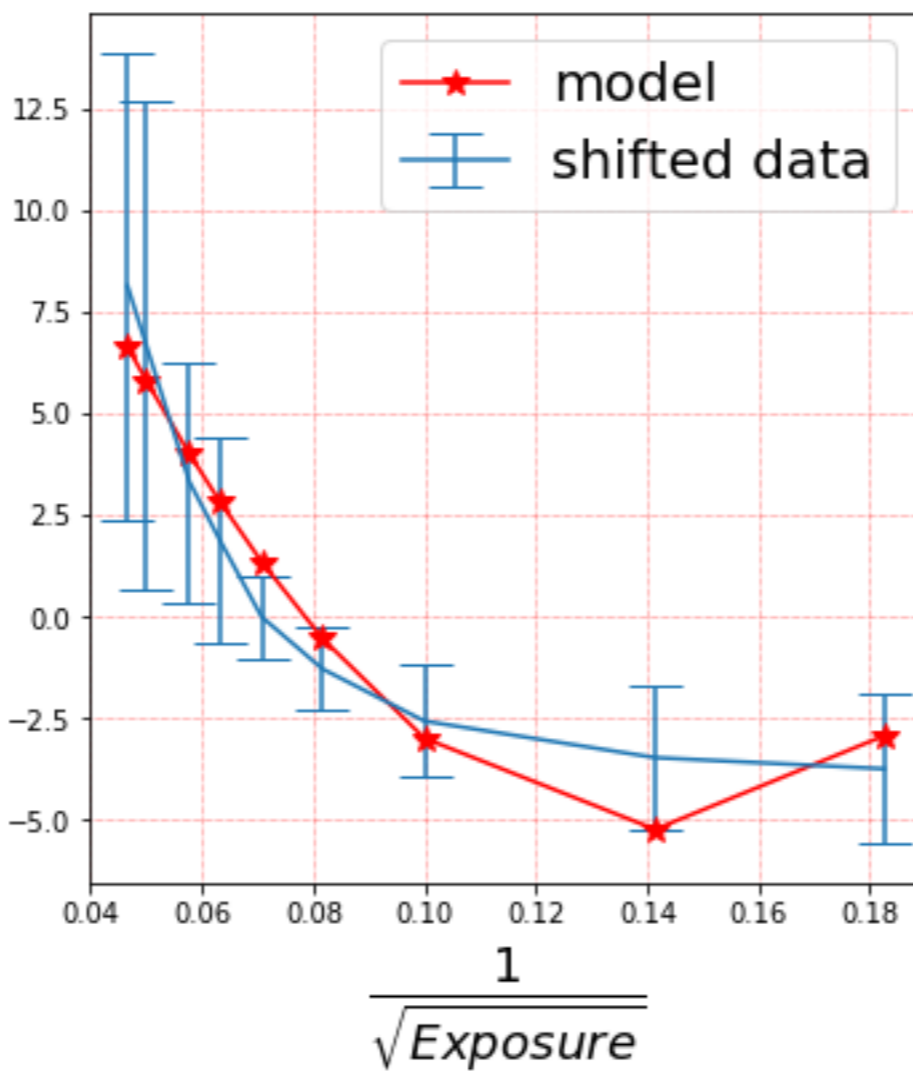

gldm\_LargeDependenceLowGrayLevelEmphasis

Corrected data

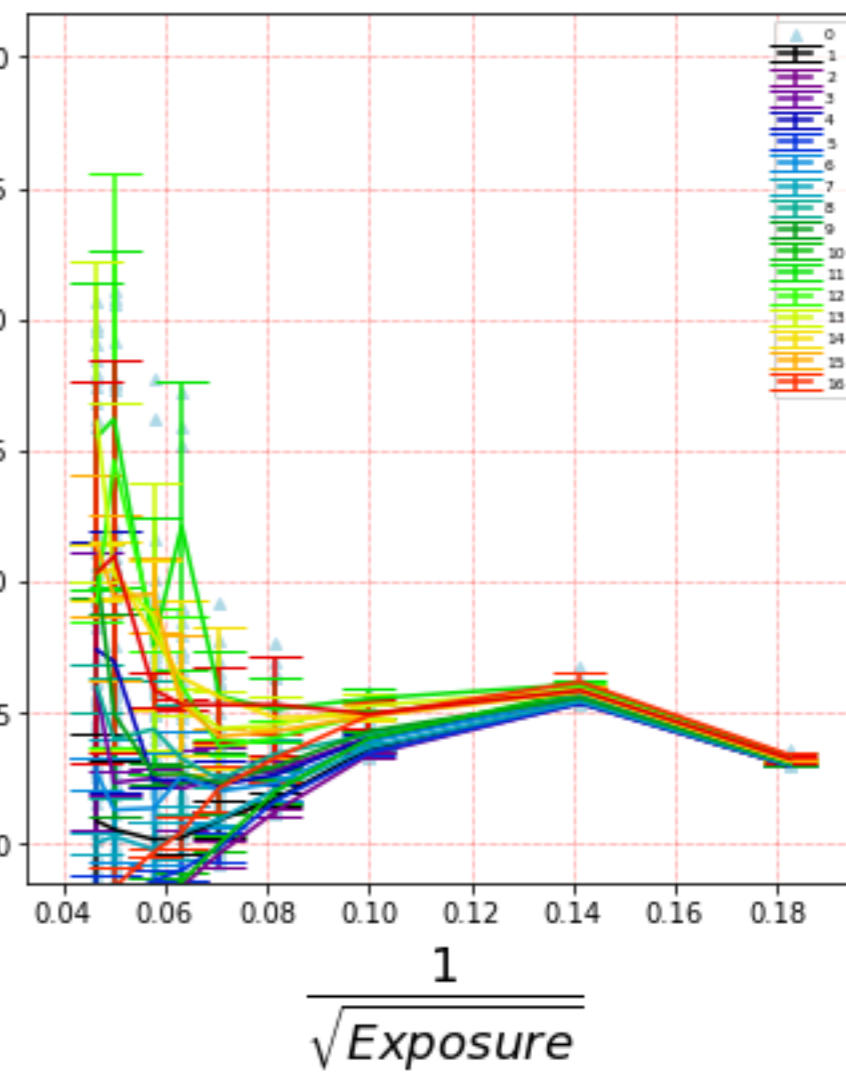

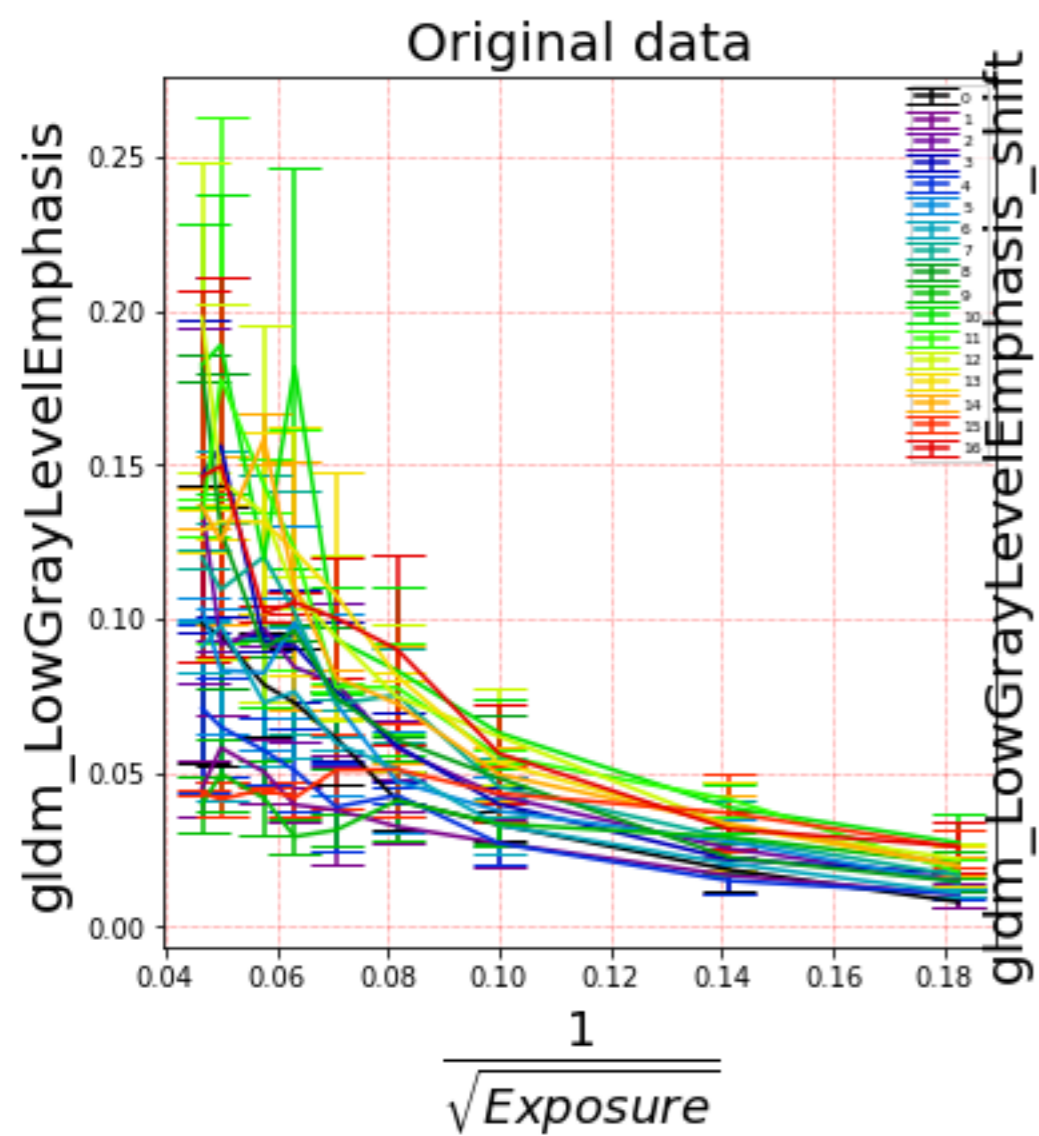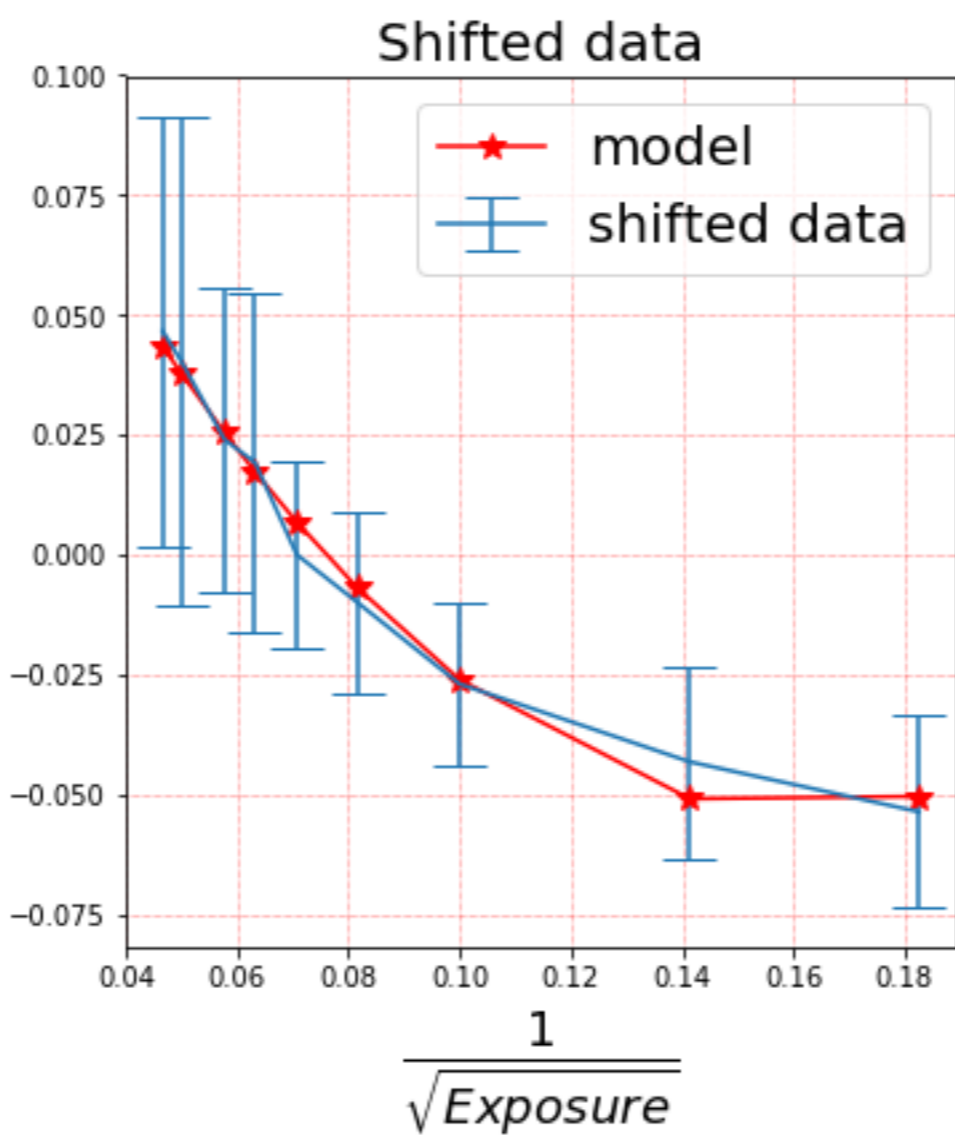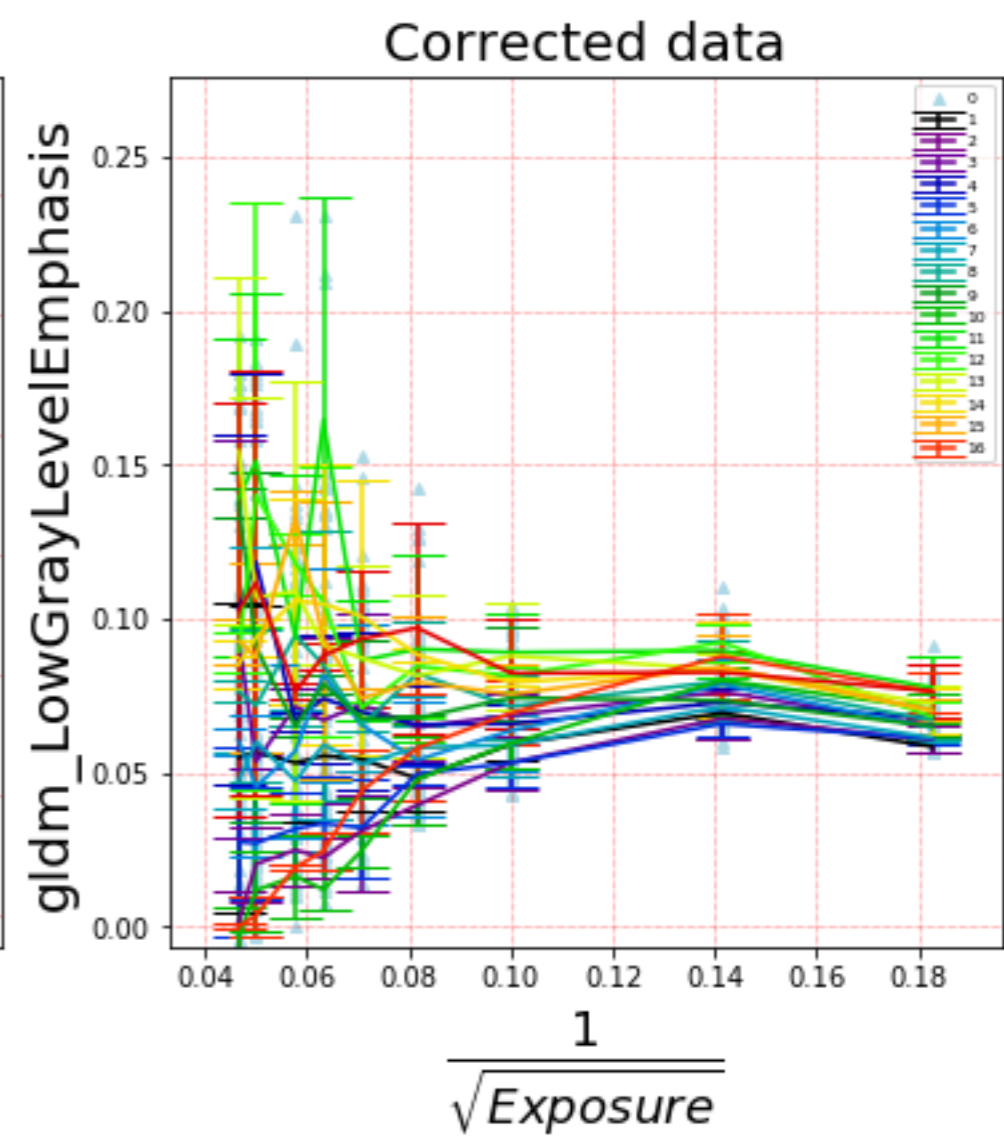



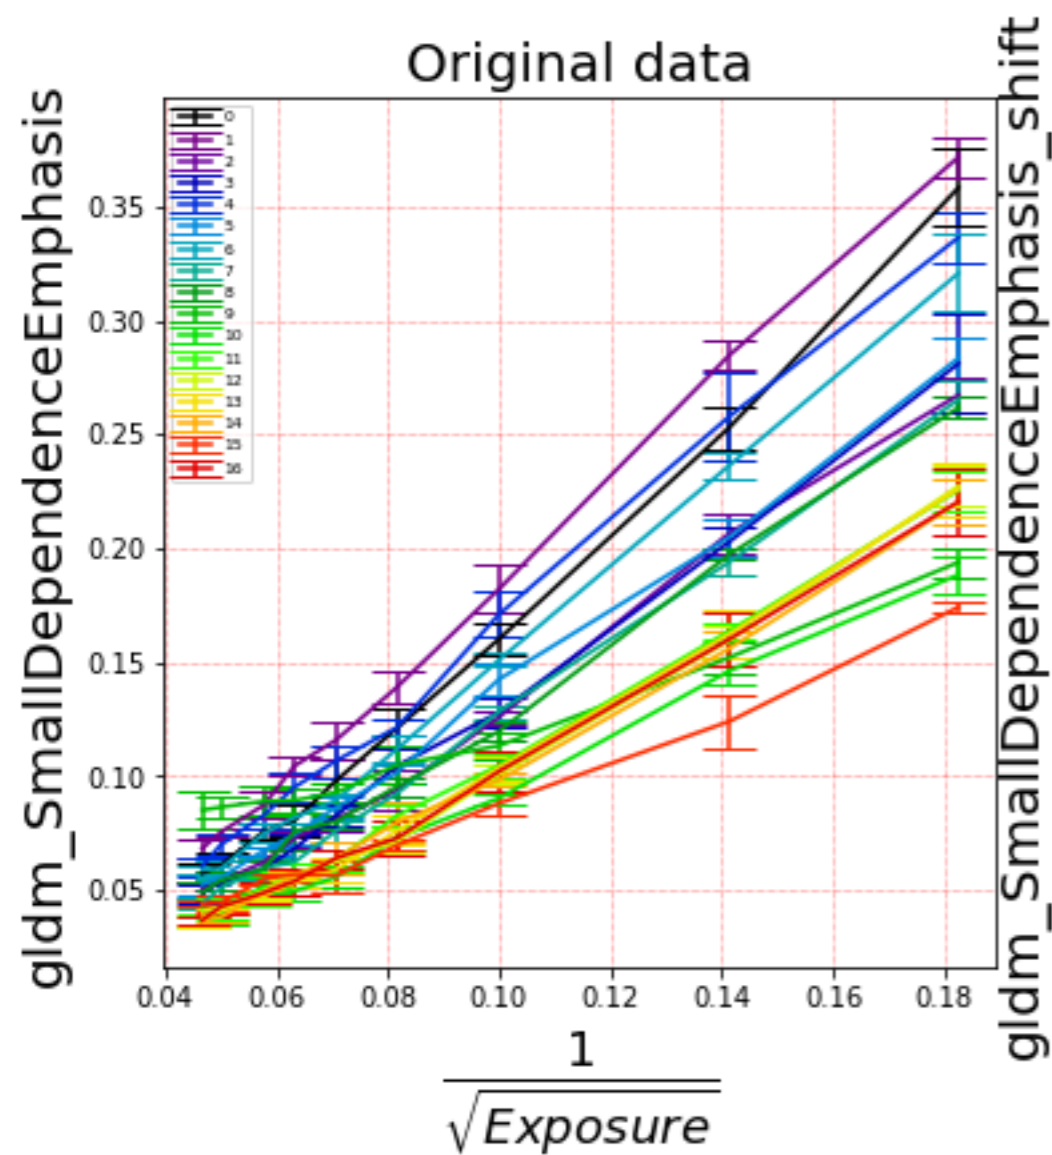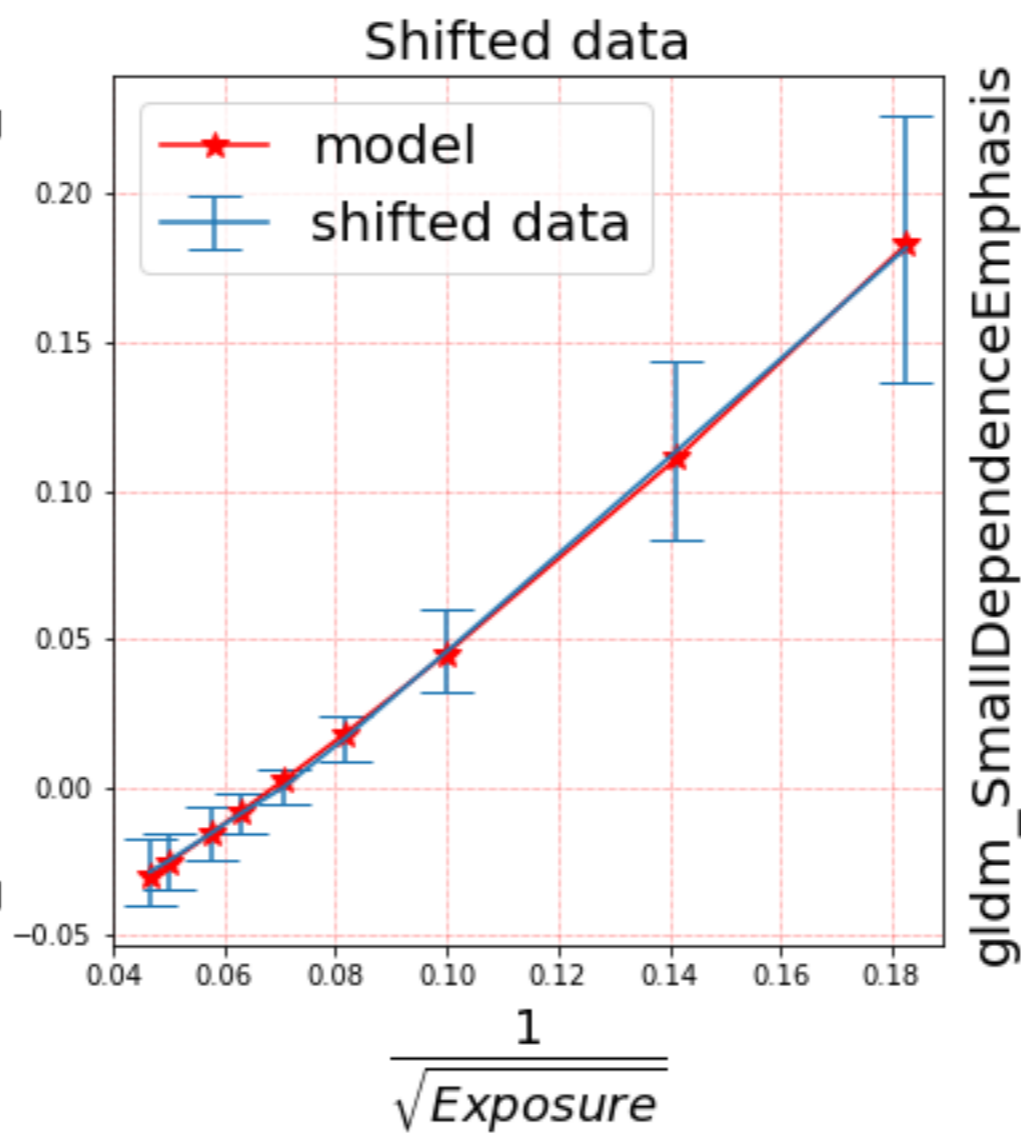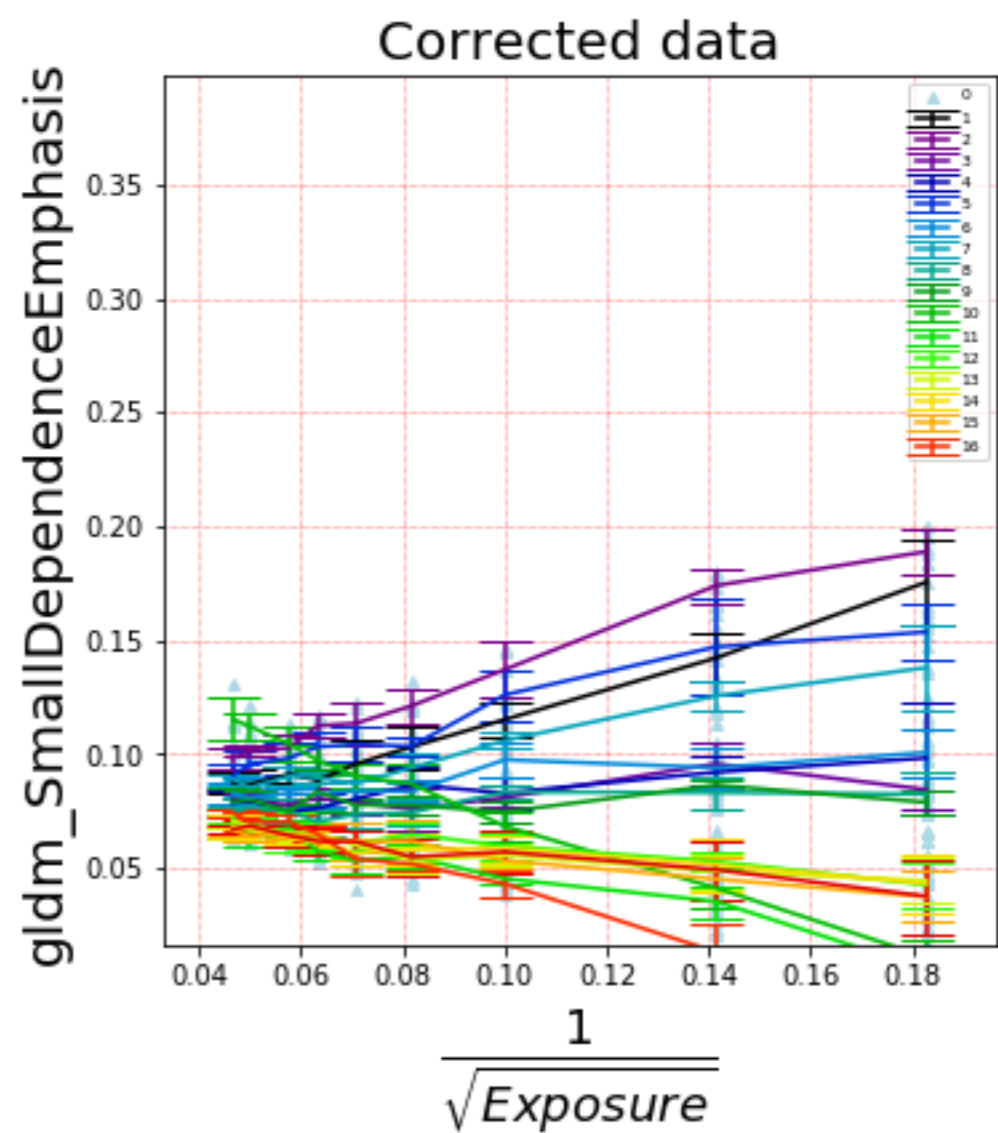



gldm\_SmallDependenceHighGrayLevelEmphasis

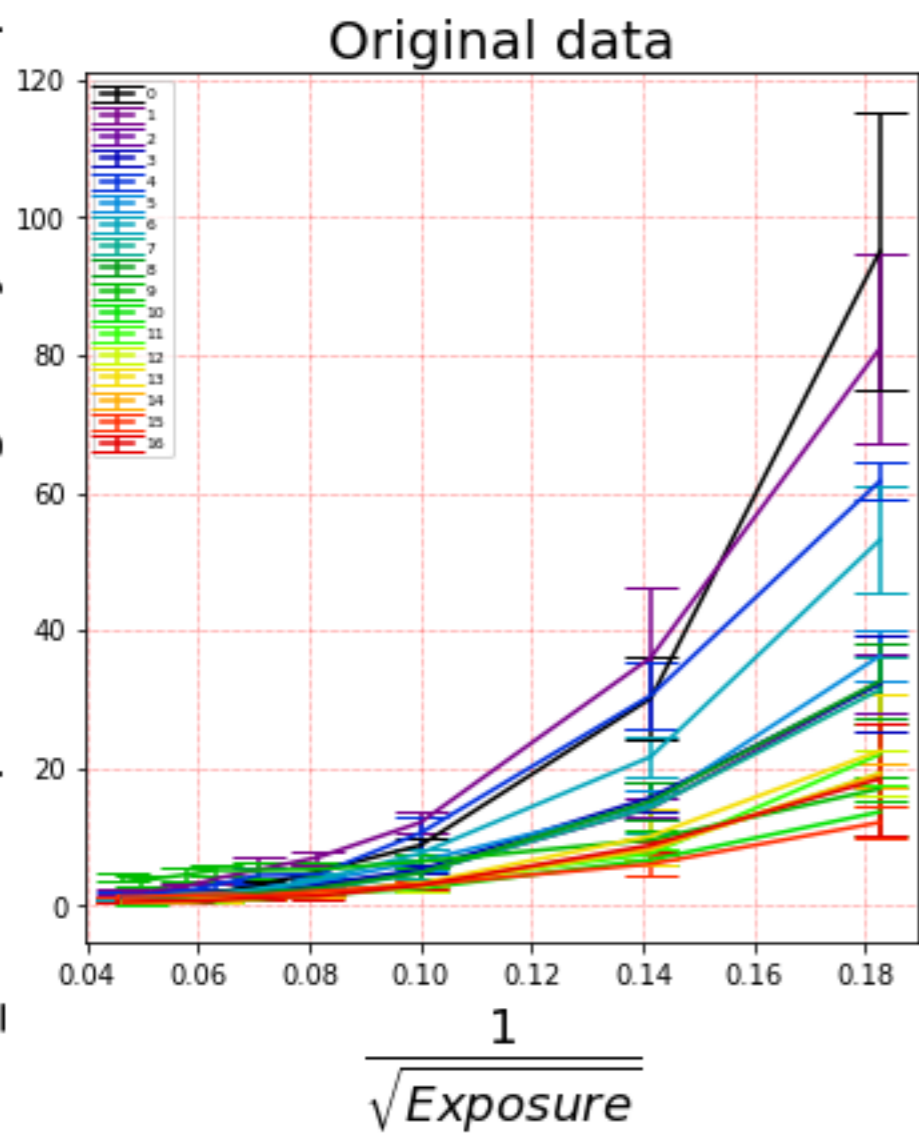

gldm\_SmallDependenceHighGrayLevelEmphasis\_shift

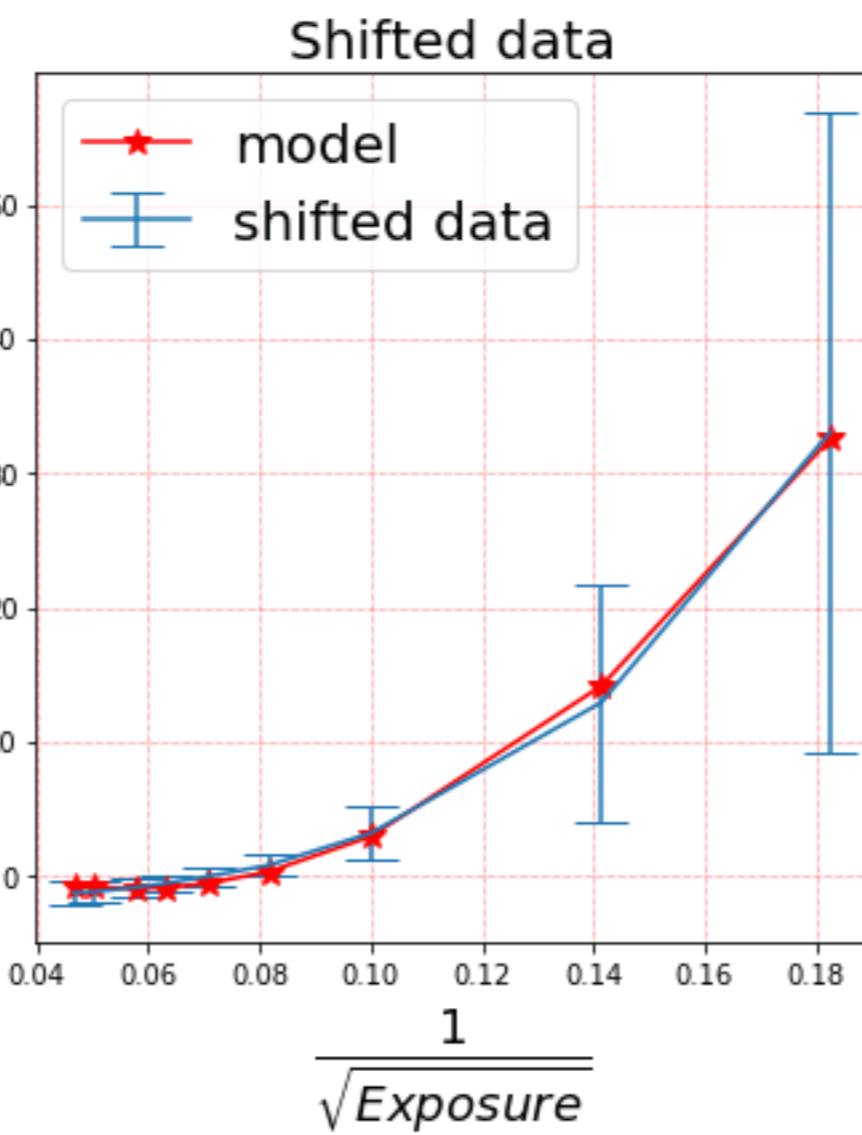

gldm\_SmallDependenceHighGrayLevelEmphasis

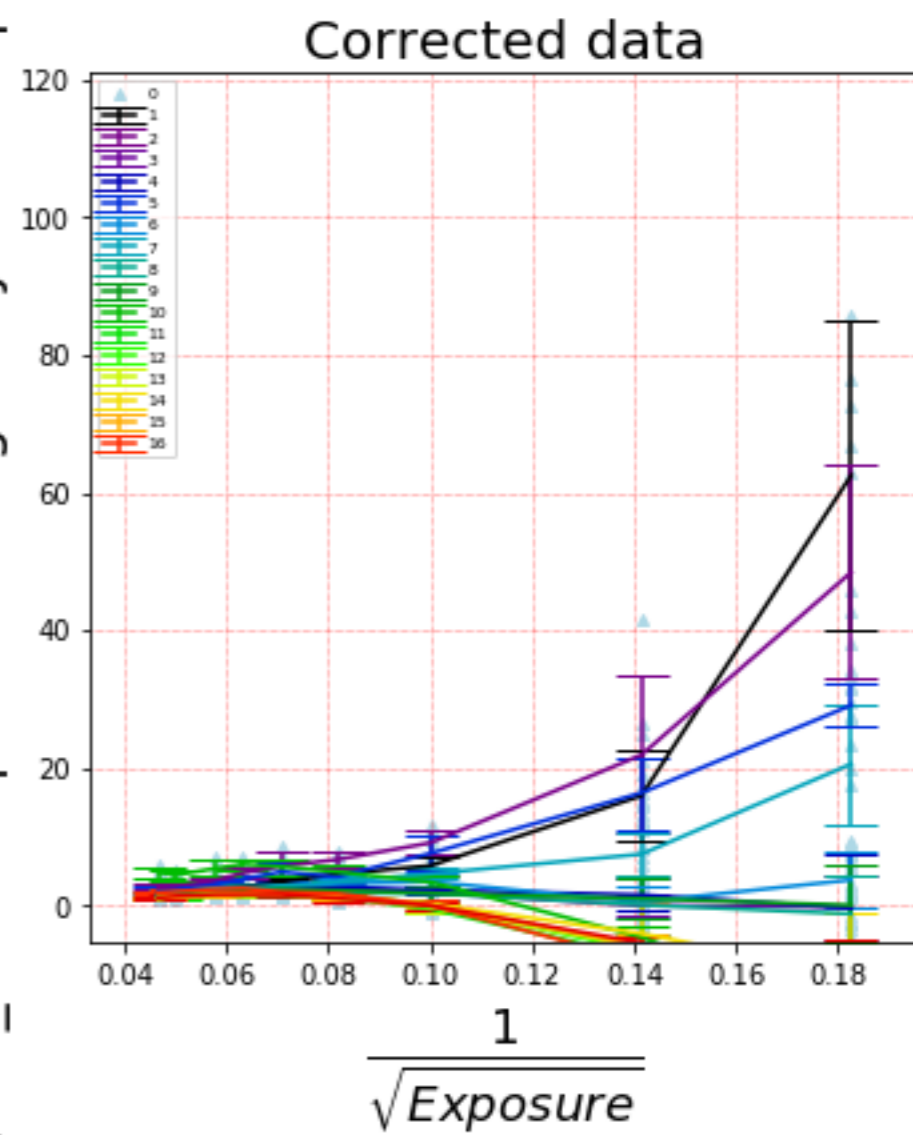

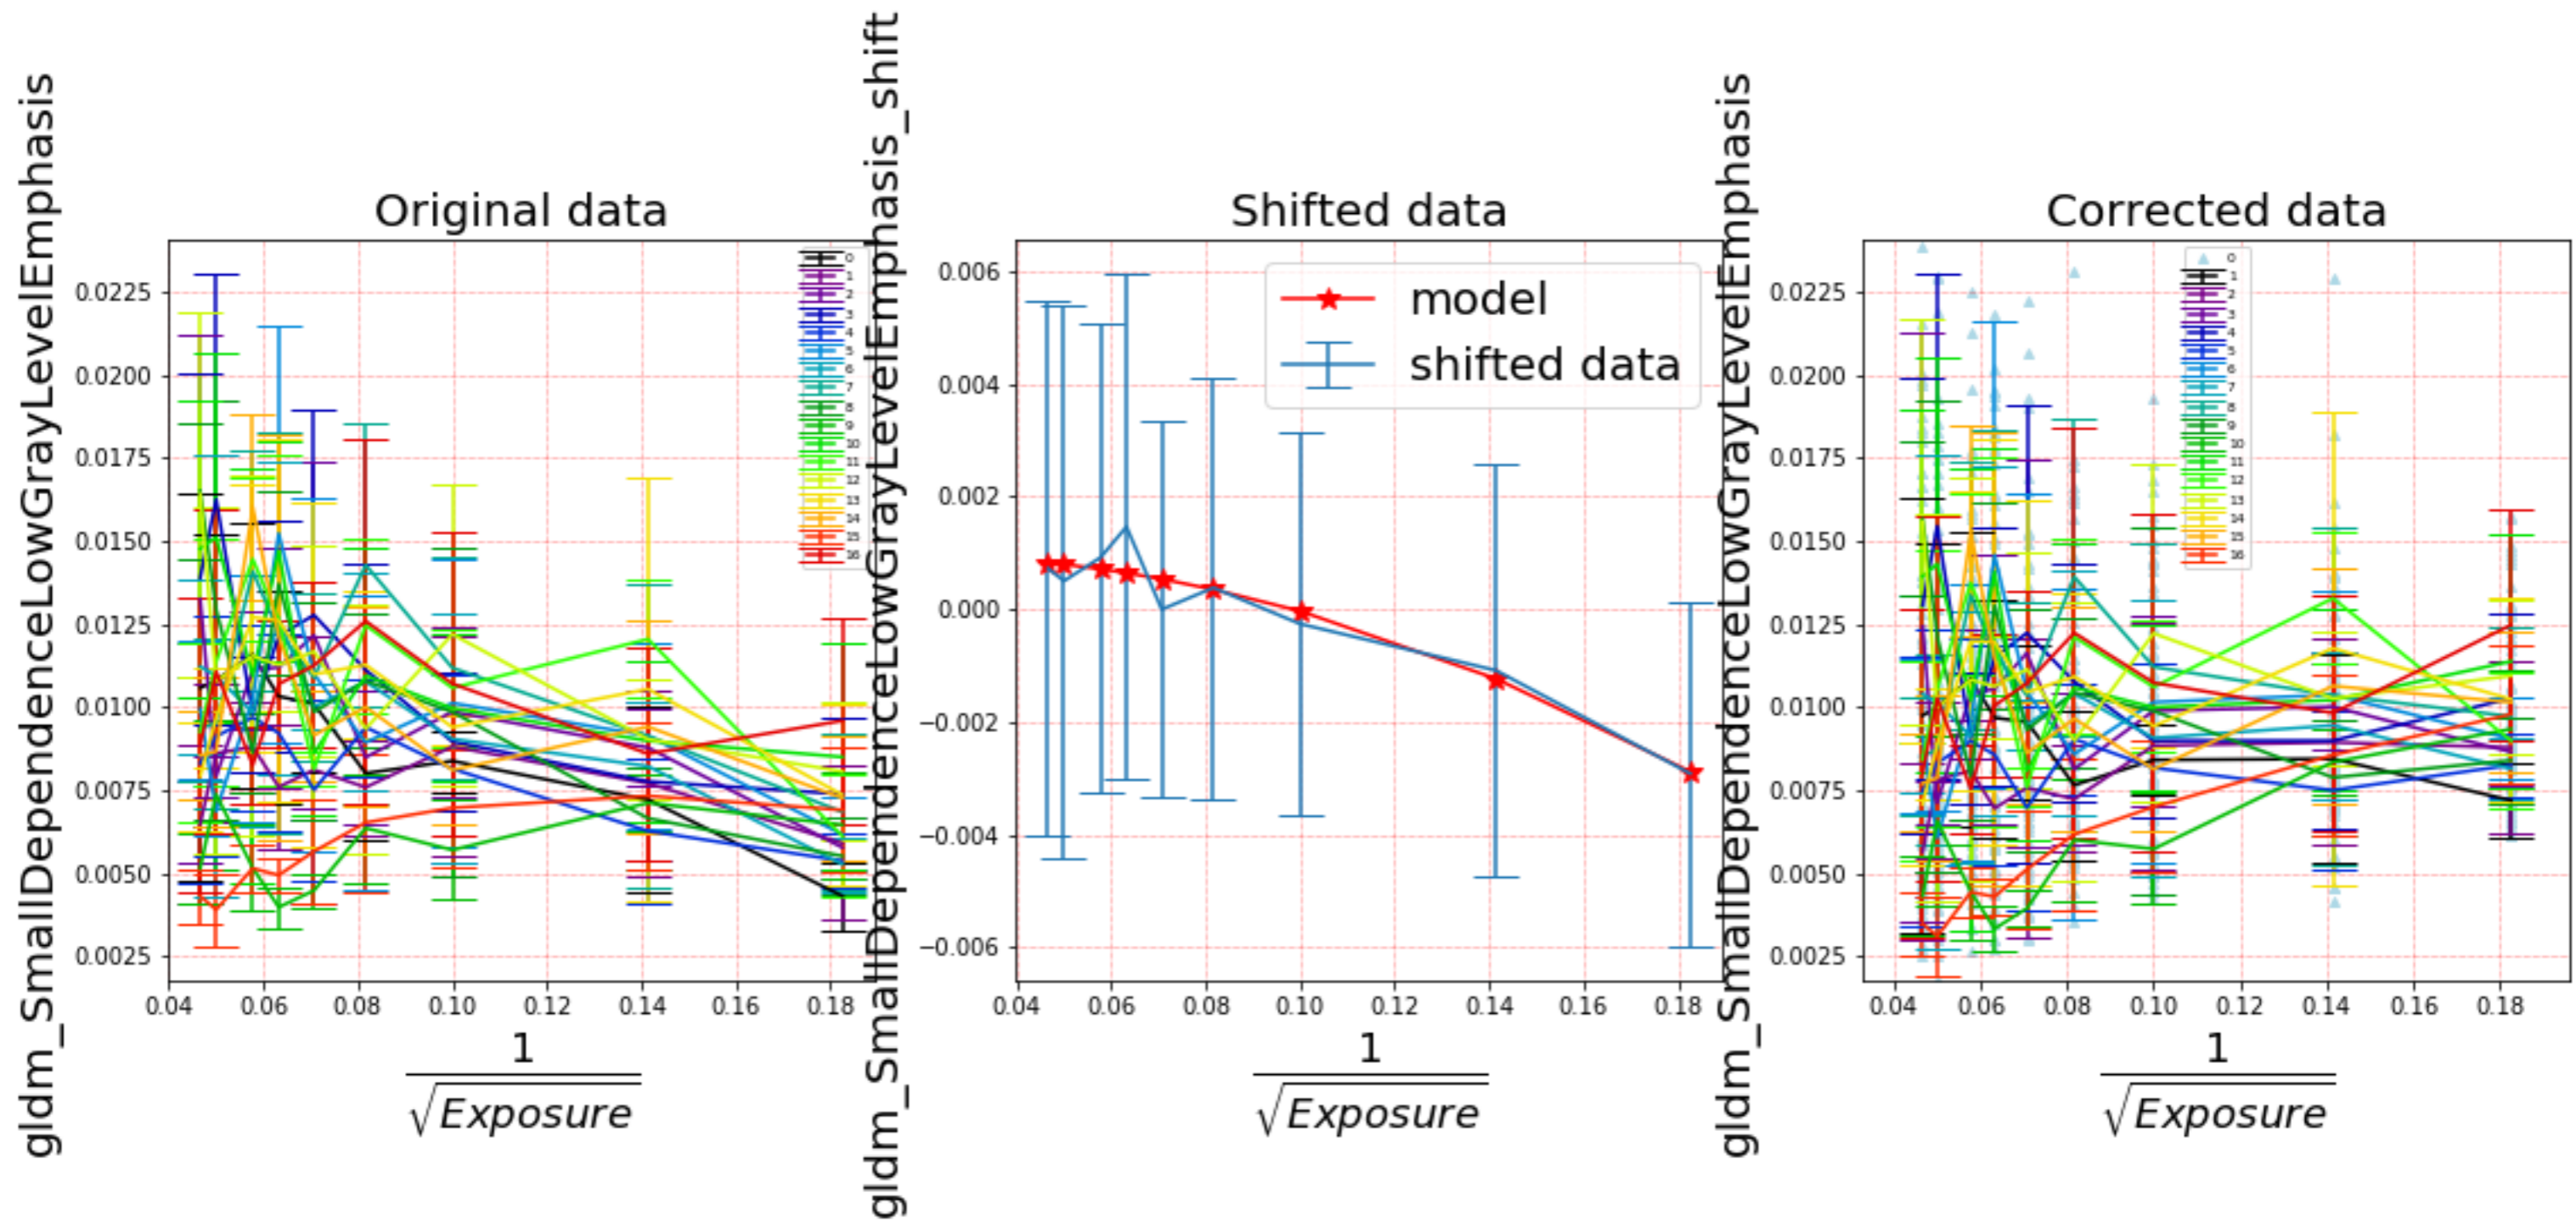

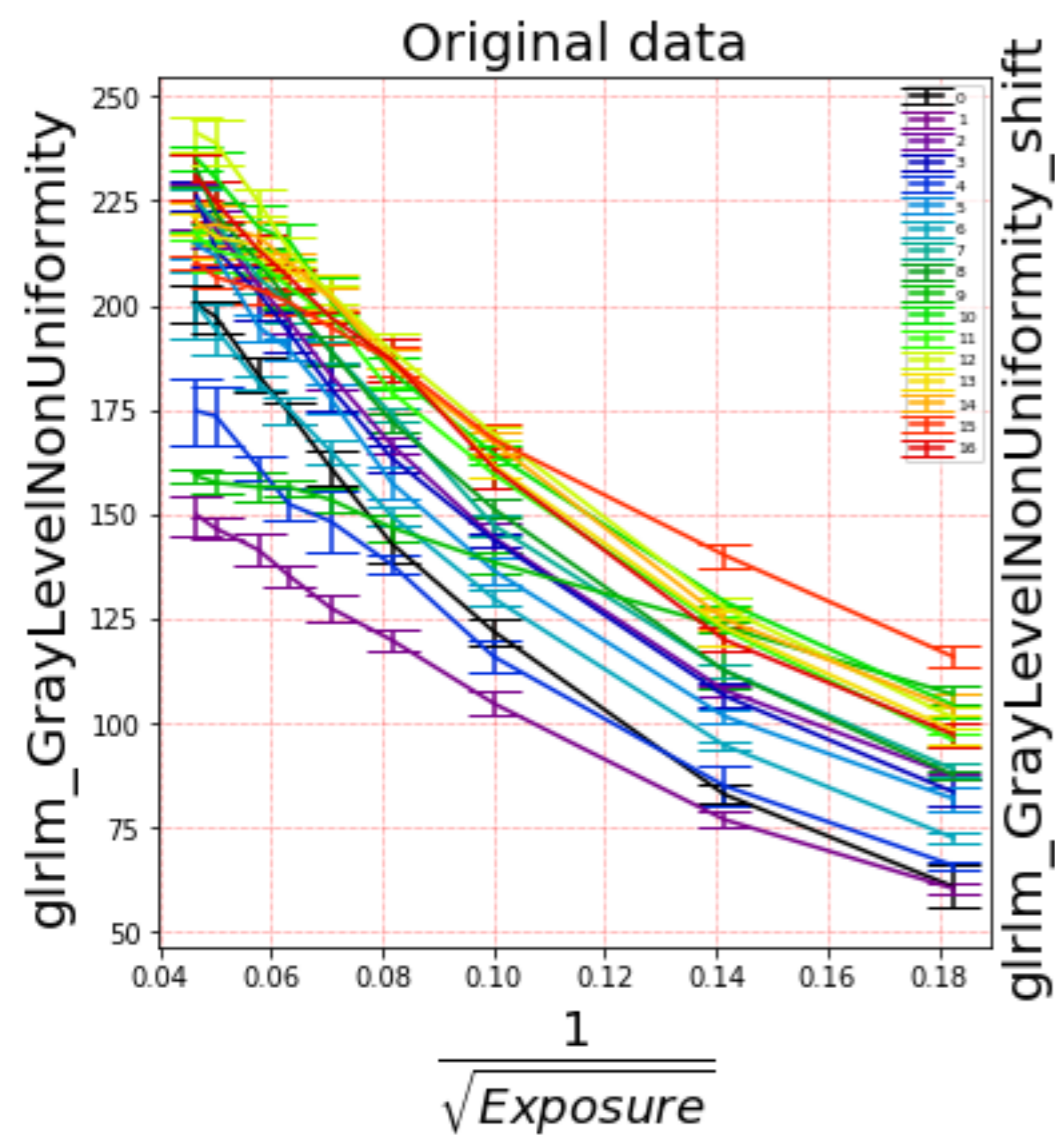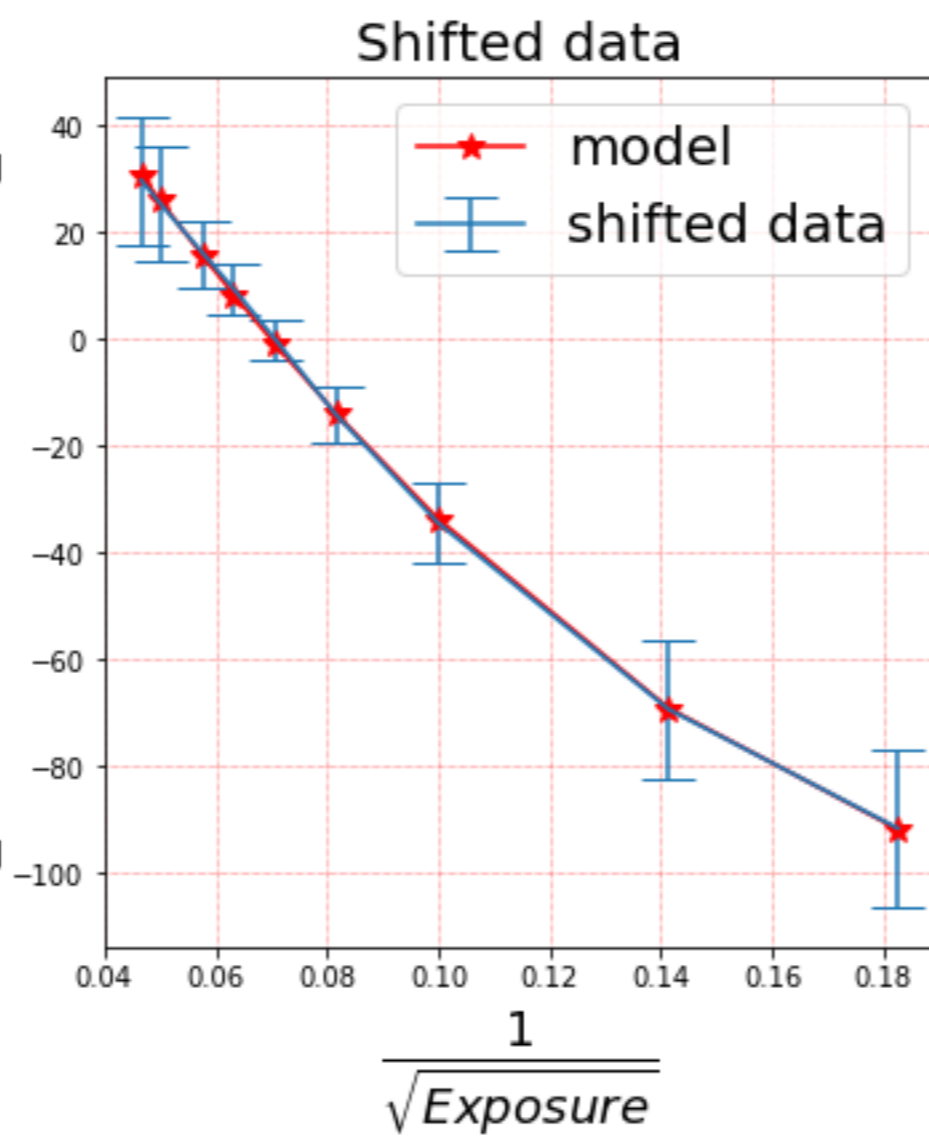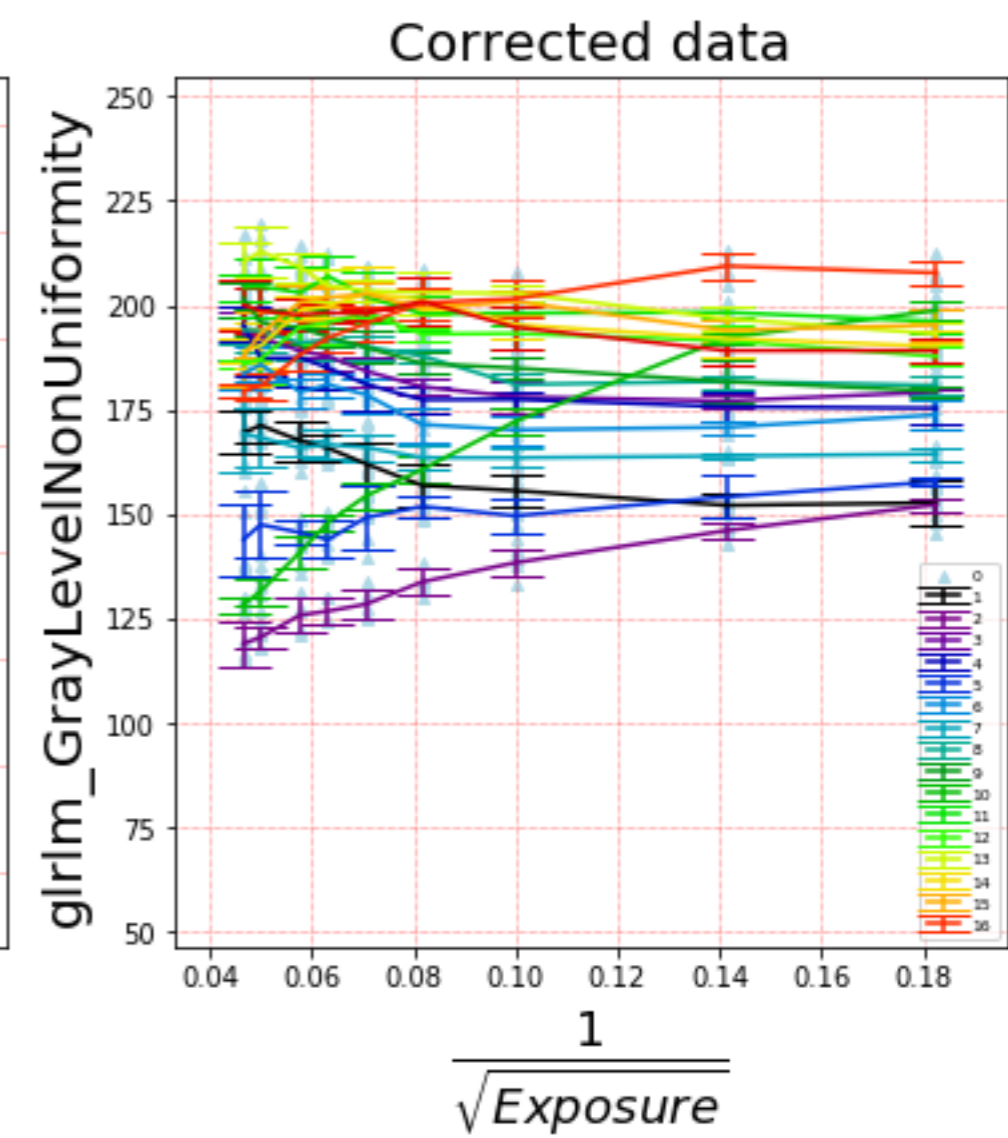



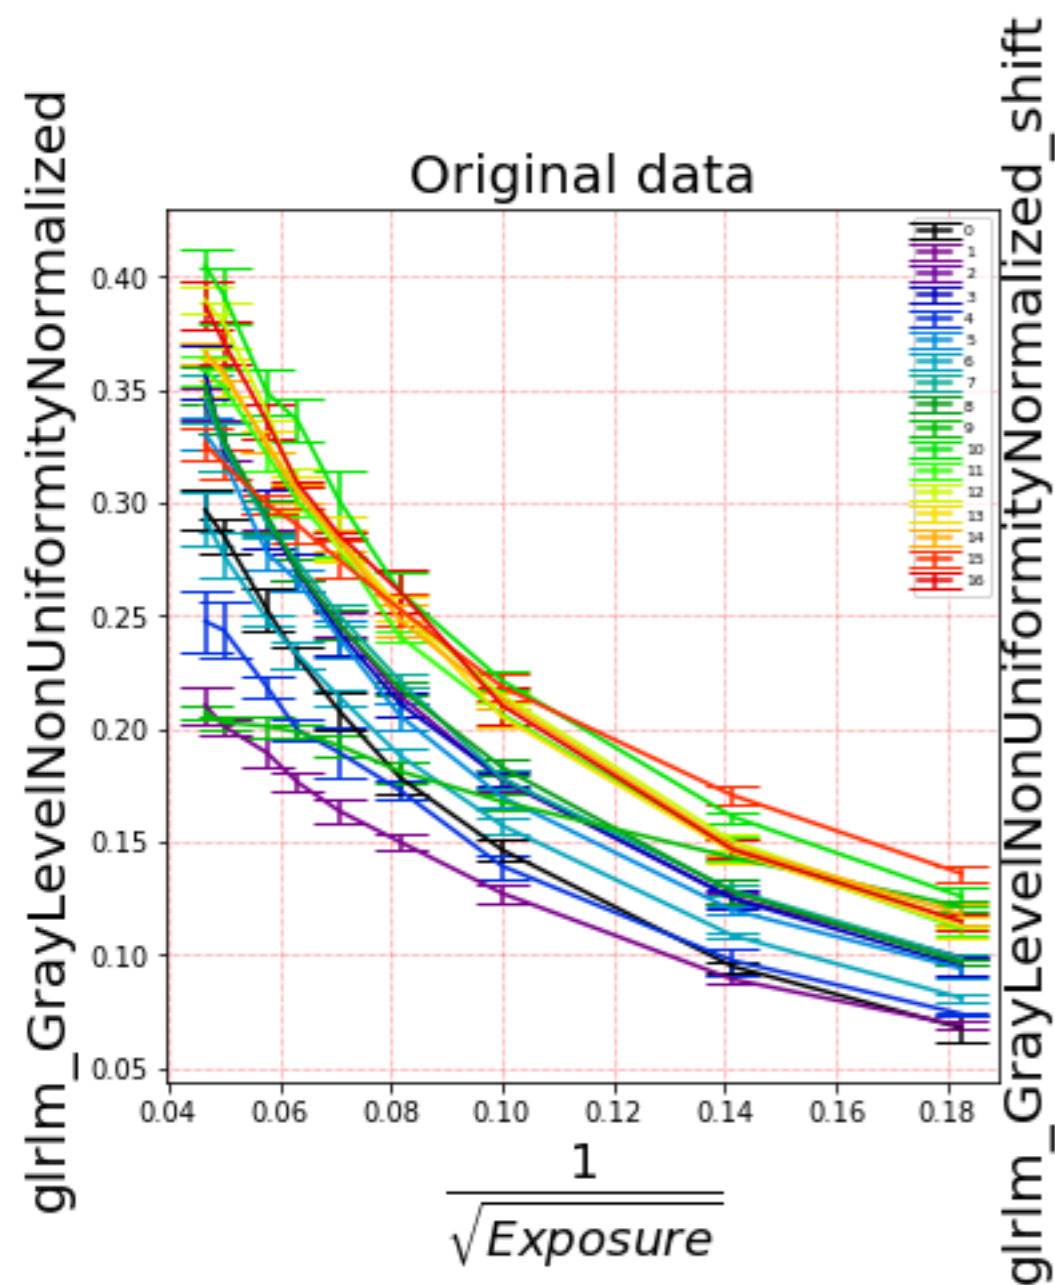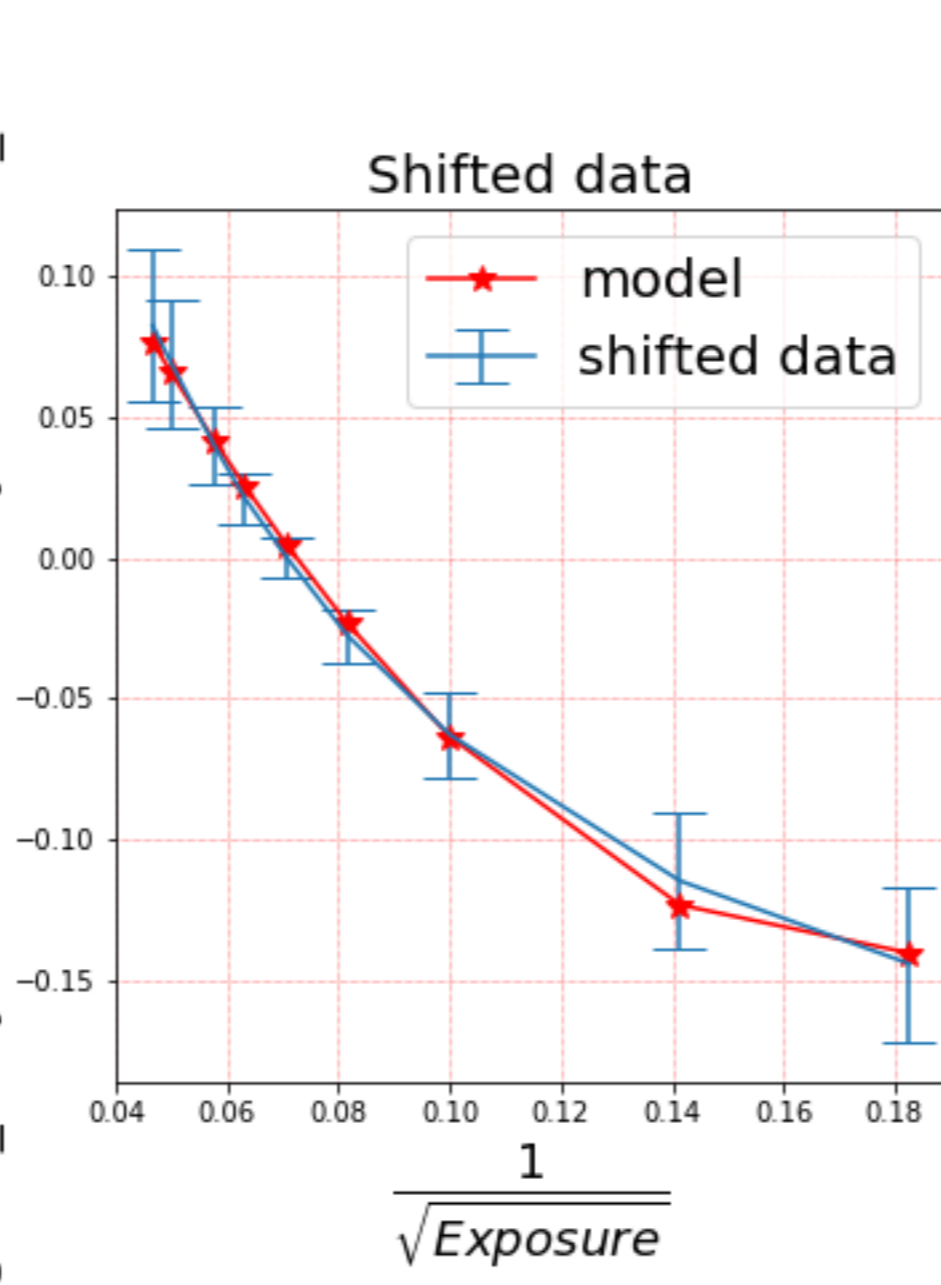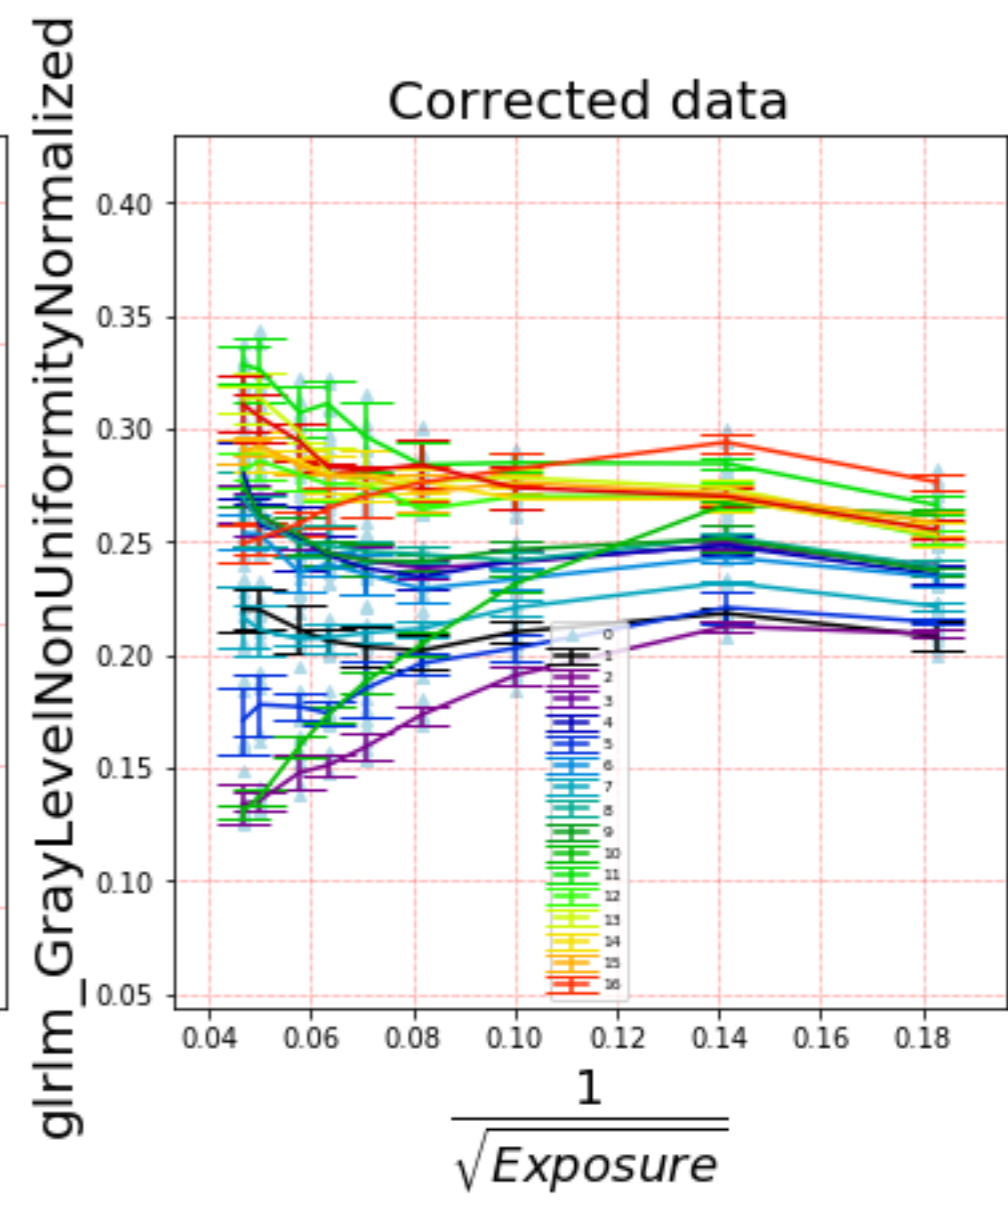

Original data

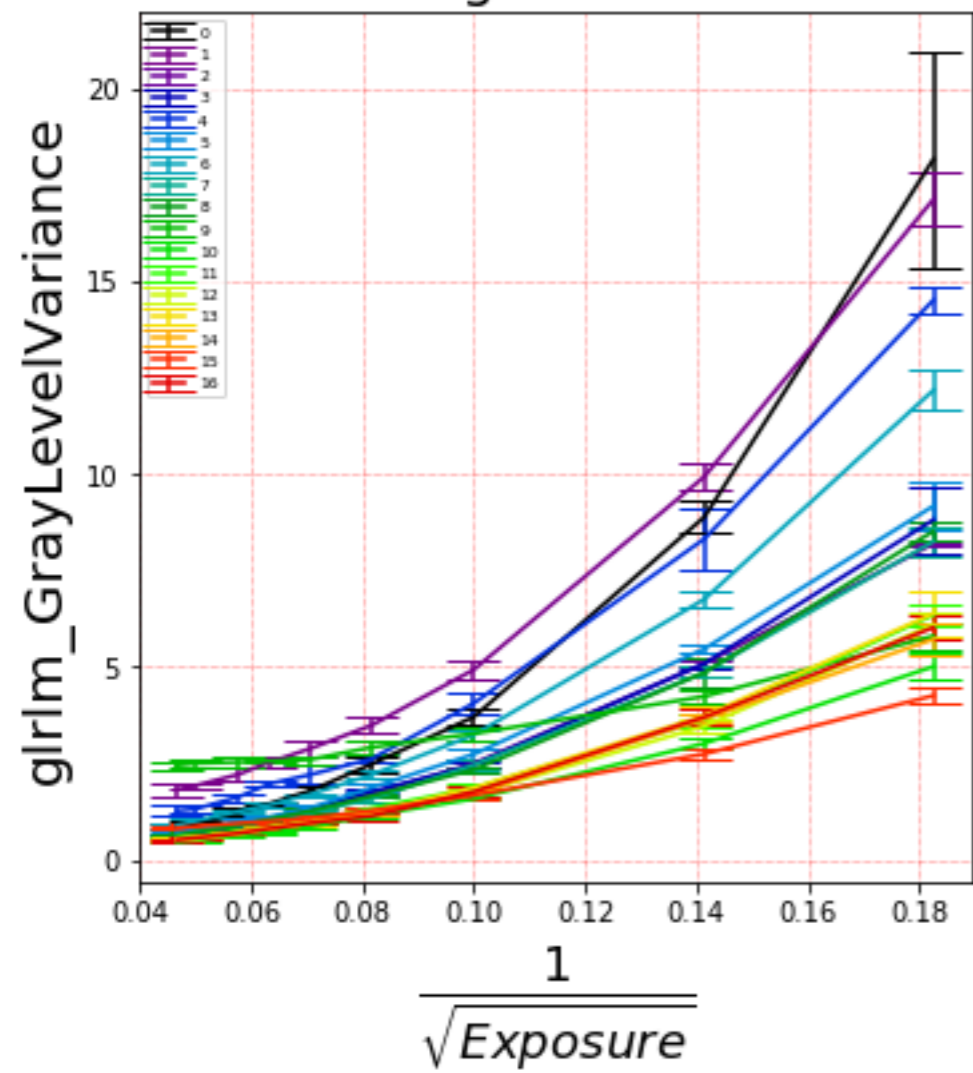

Shifted data

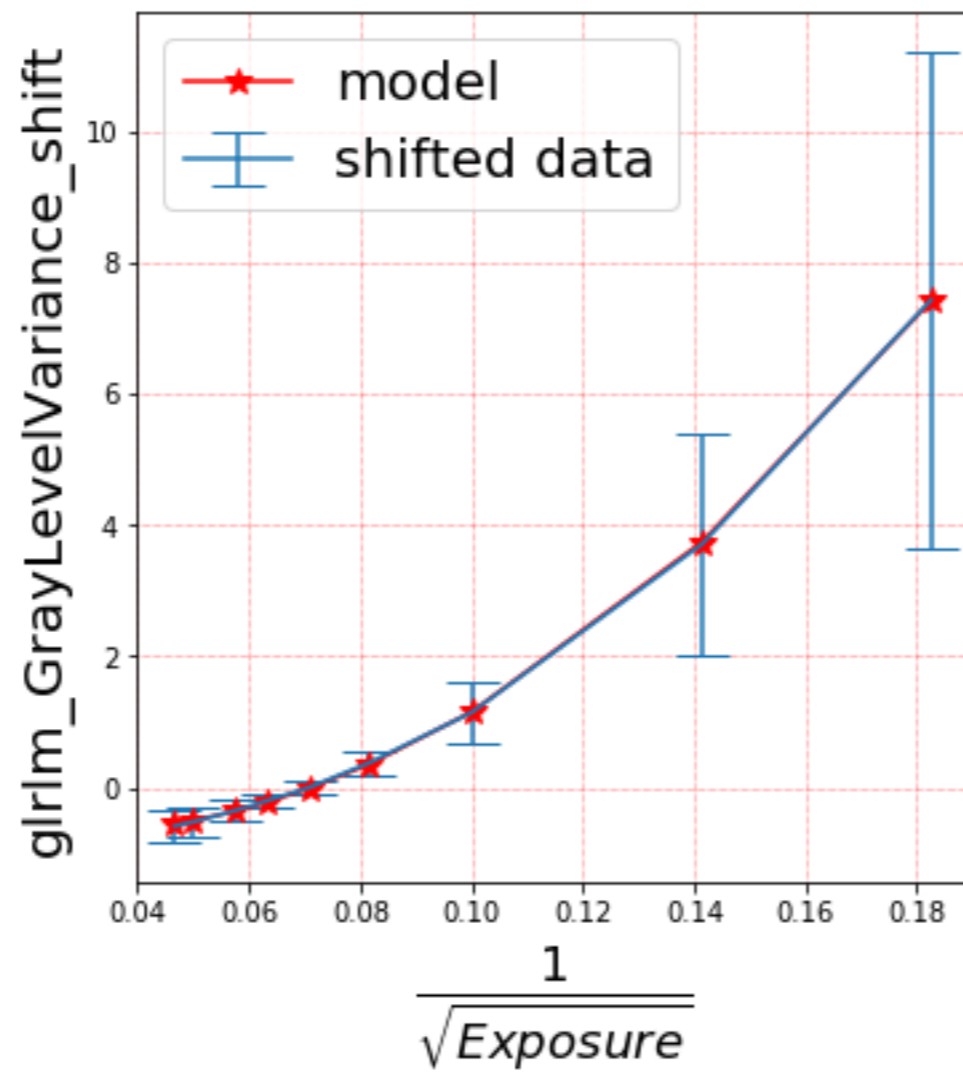

Corrected data

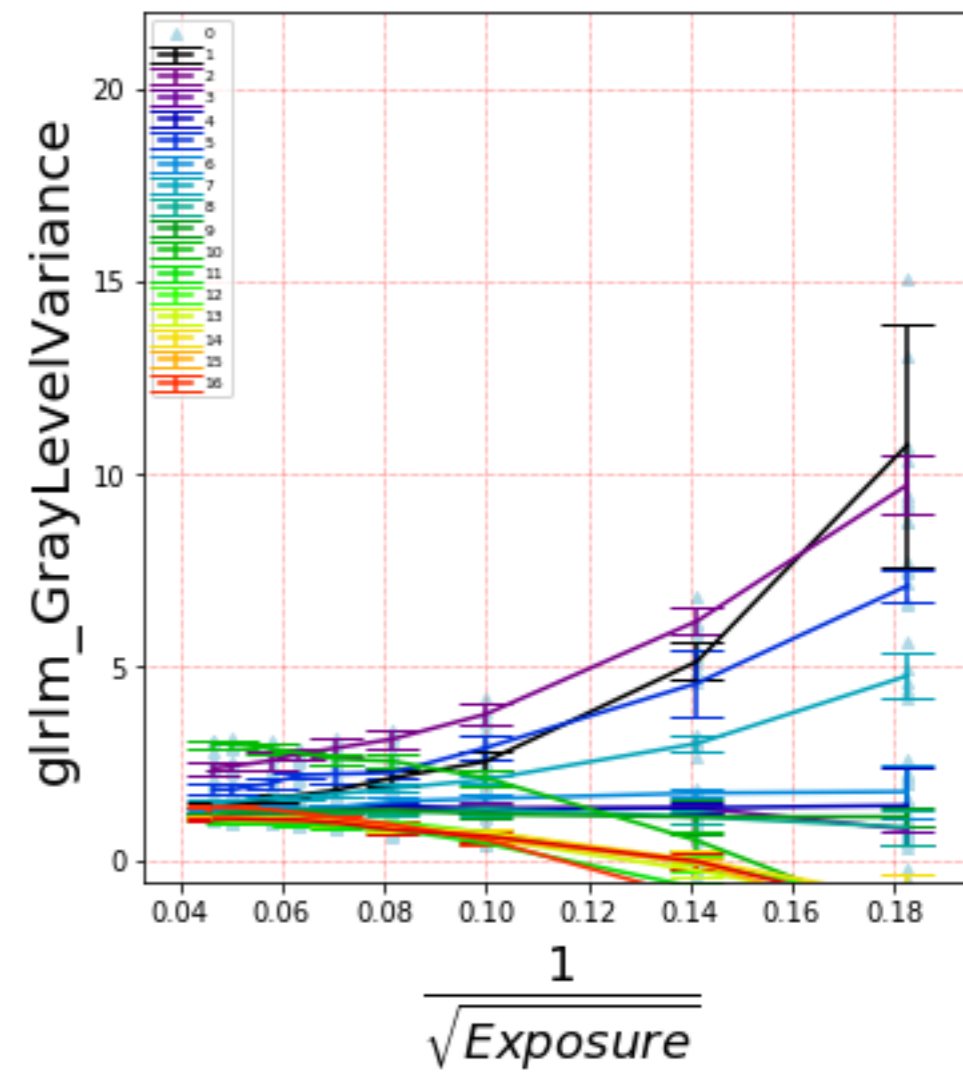



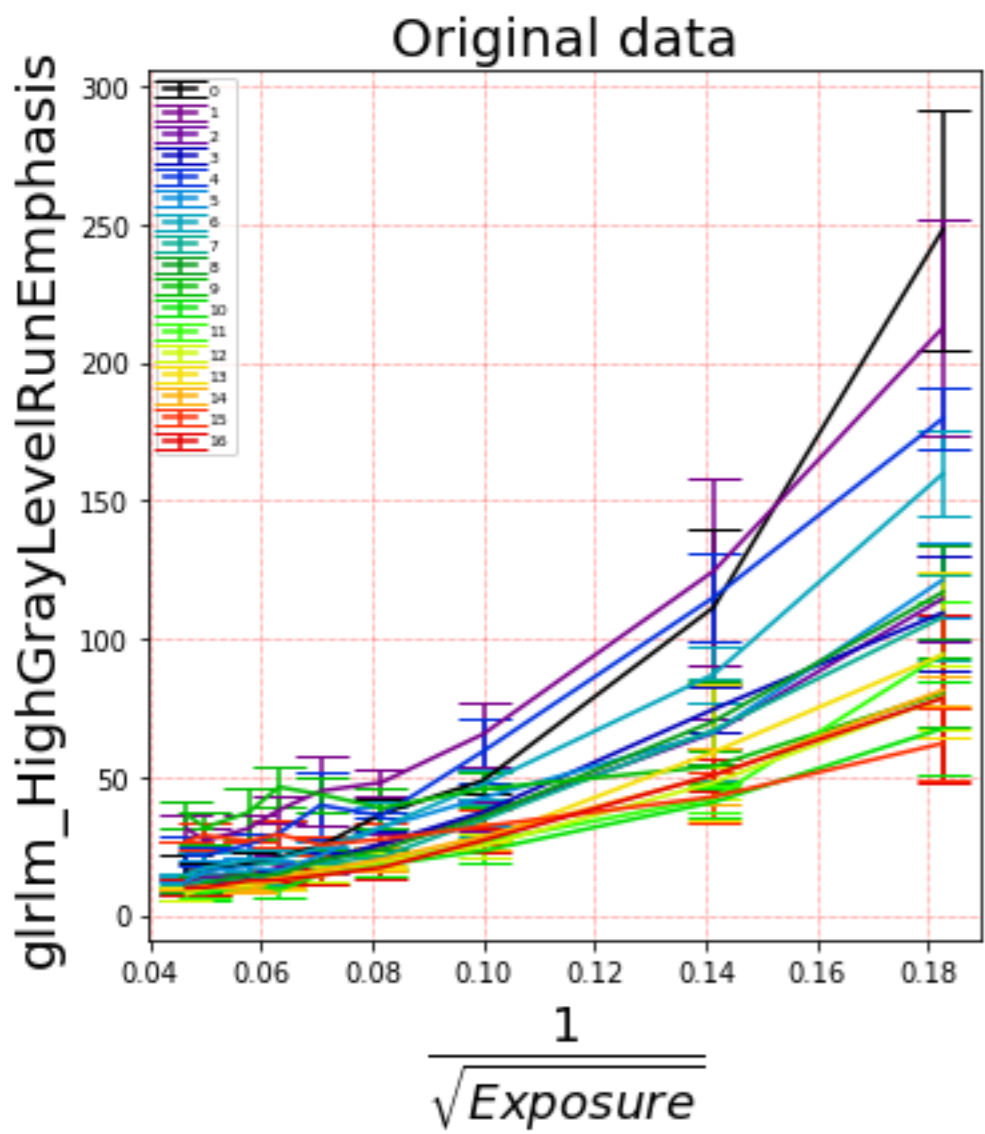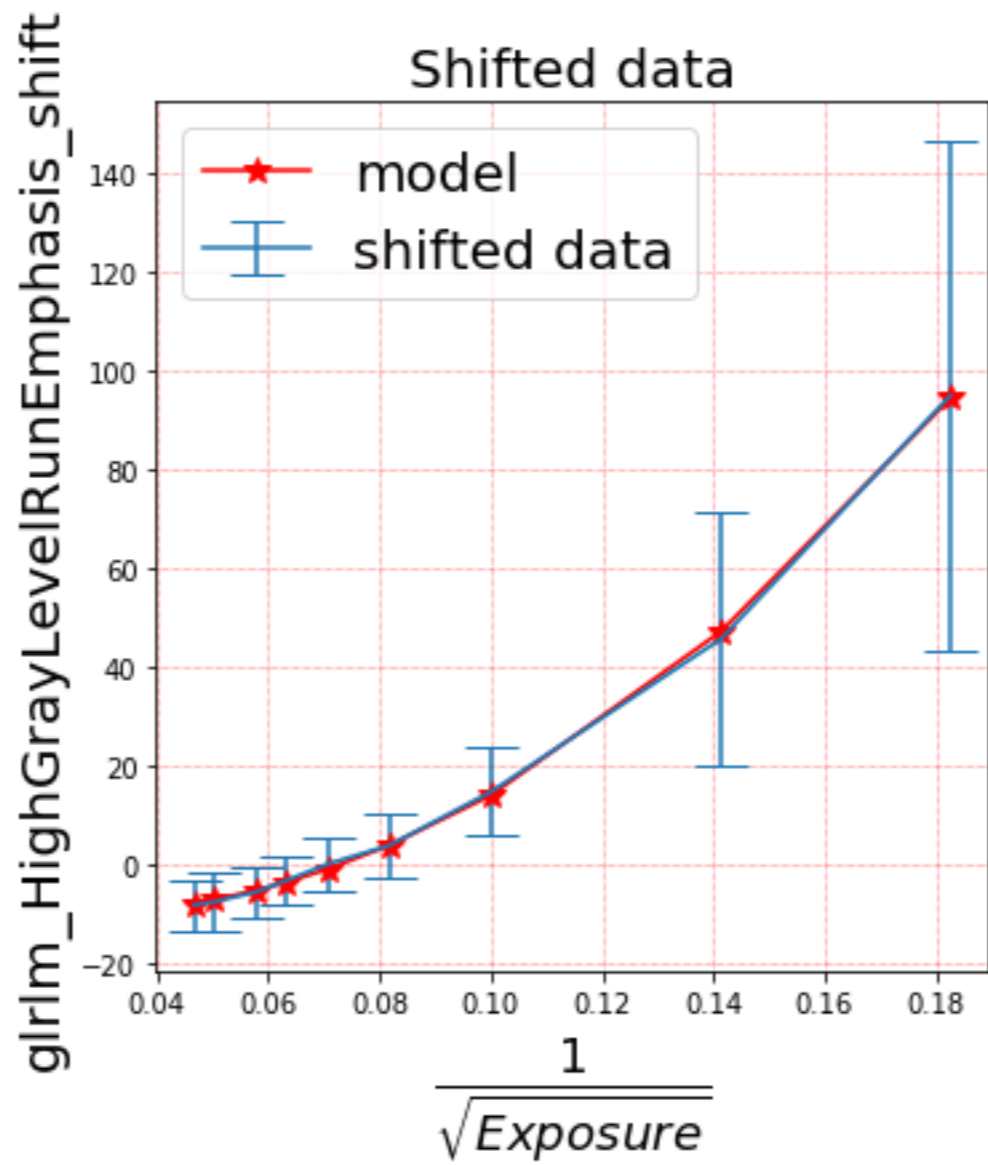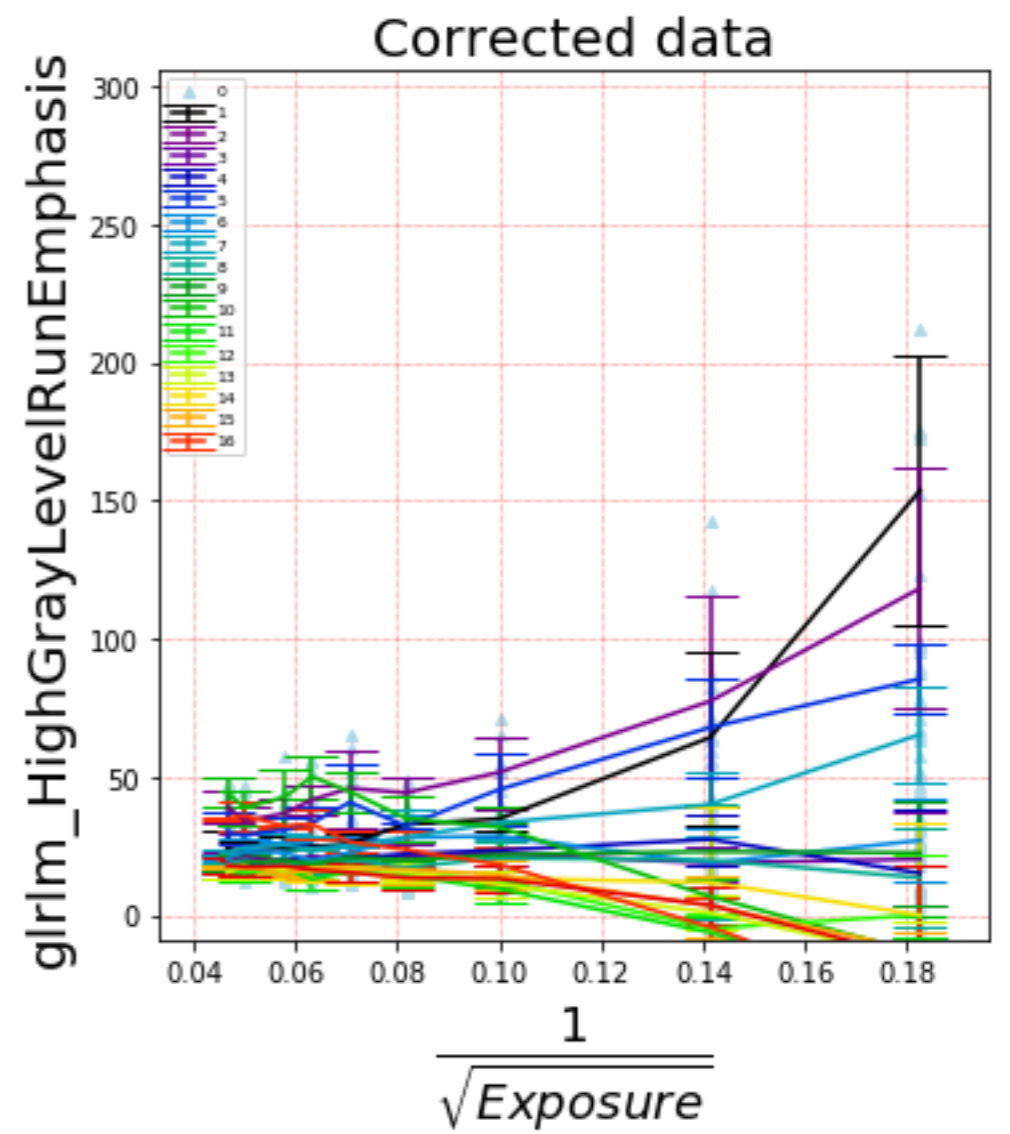

Original data

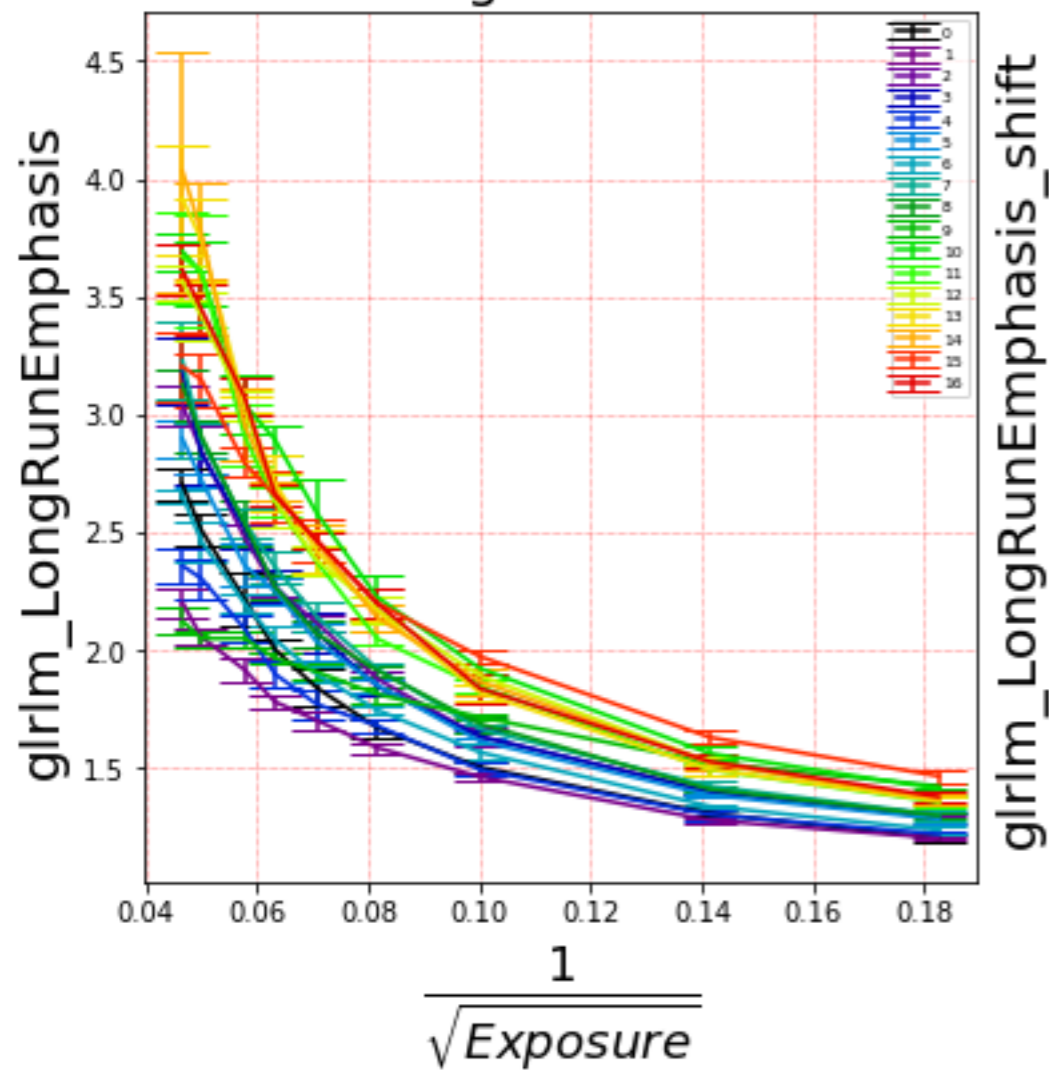

Shifted data

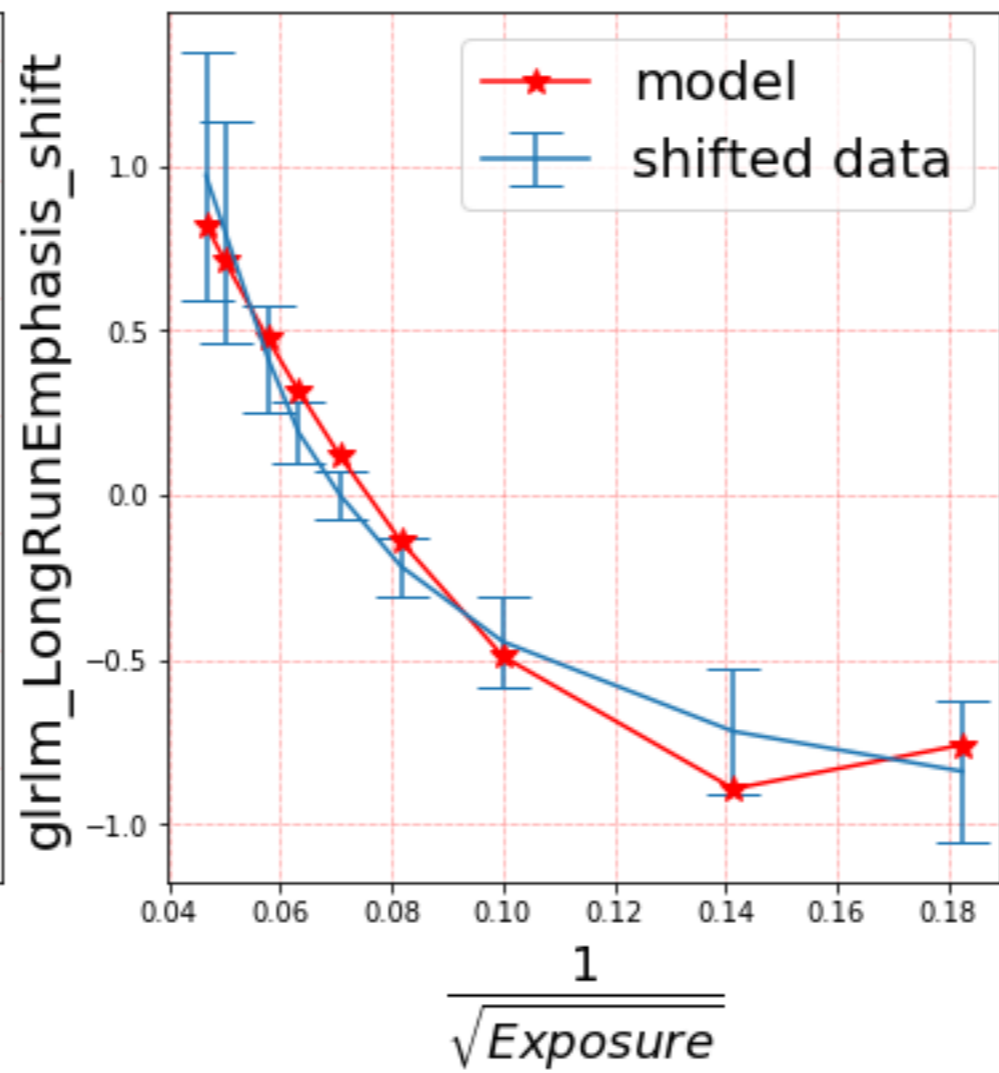

Corrected data

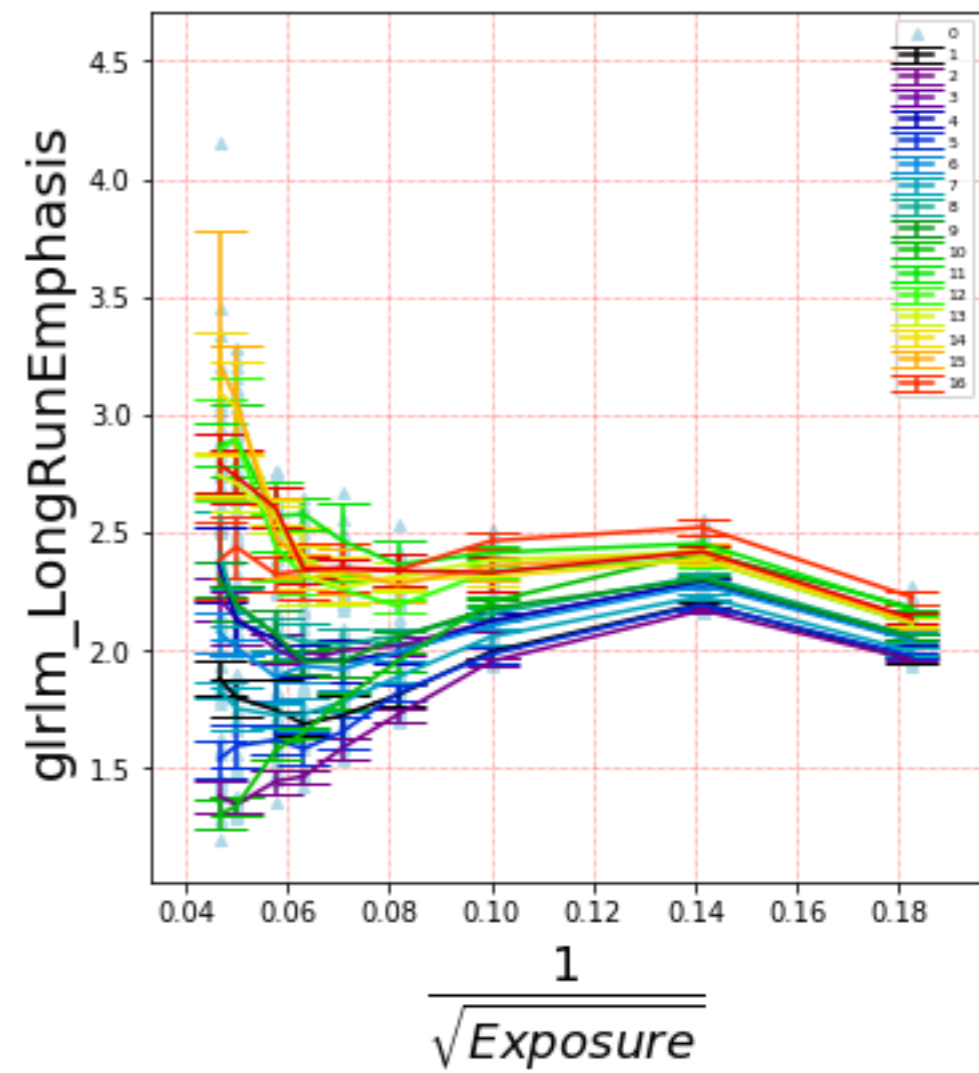

gllm\_LongRunHighGrayLevelEmphasis

Original data

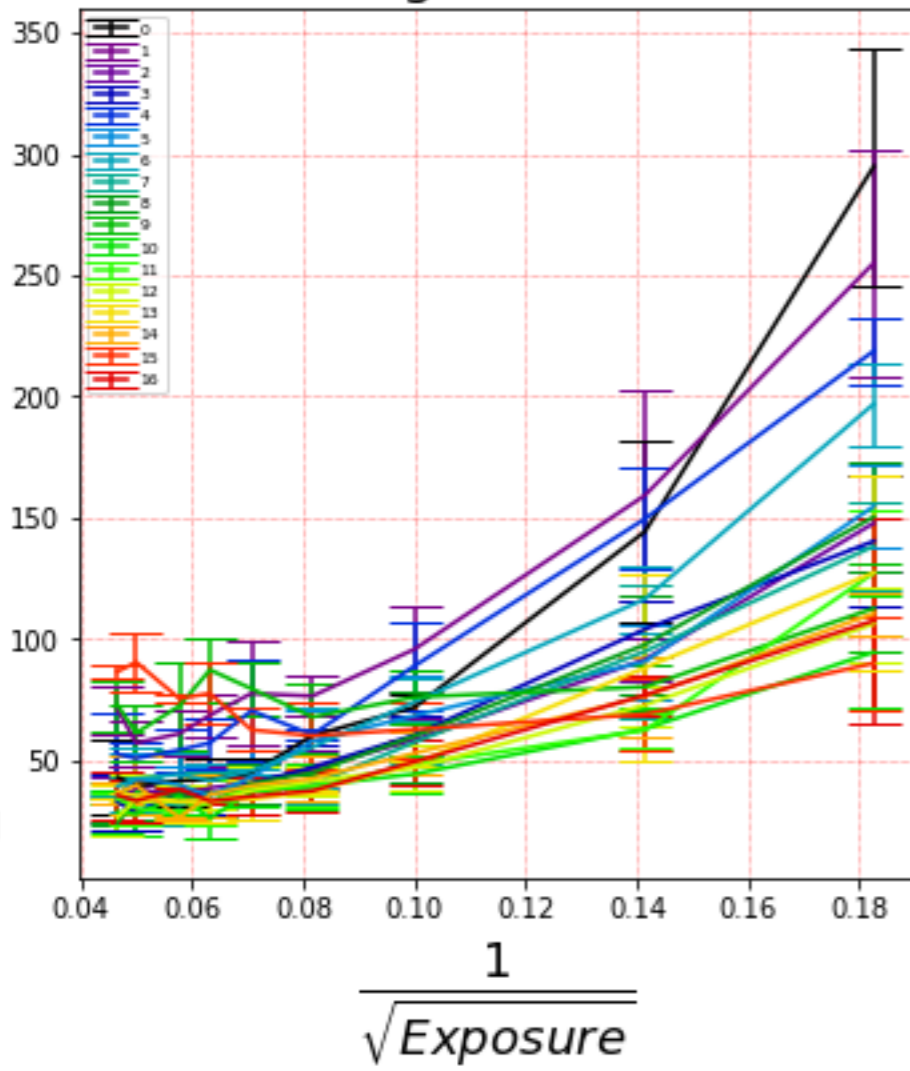

gllm\_LongRunHighGrayLevelEmphasis\_shift

Shifted data

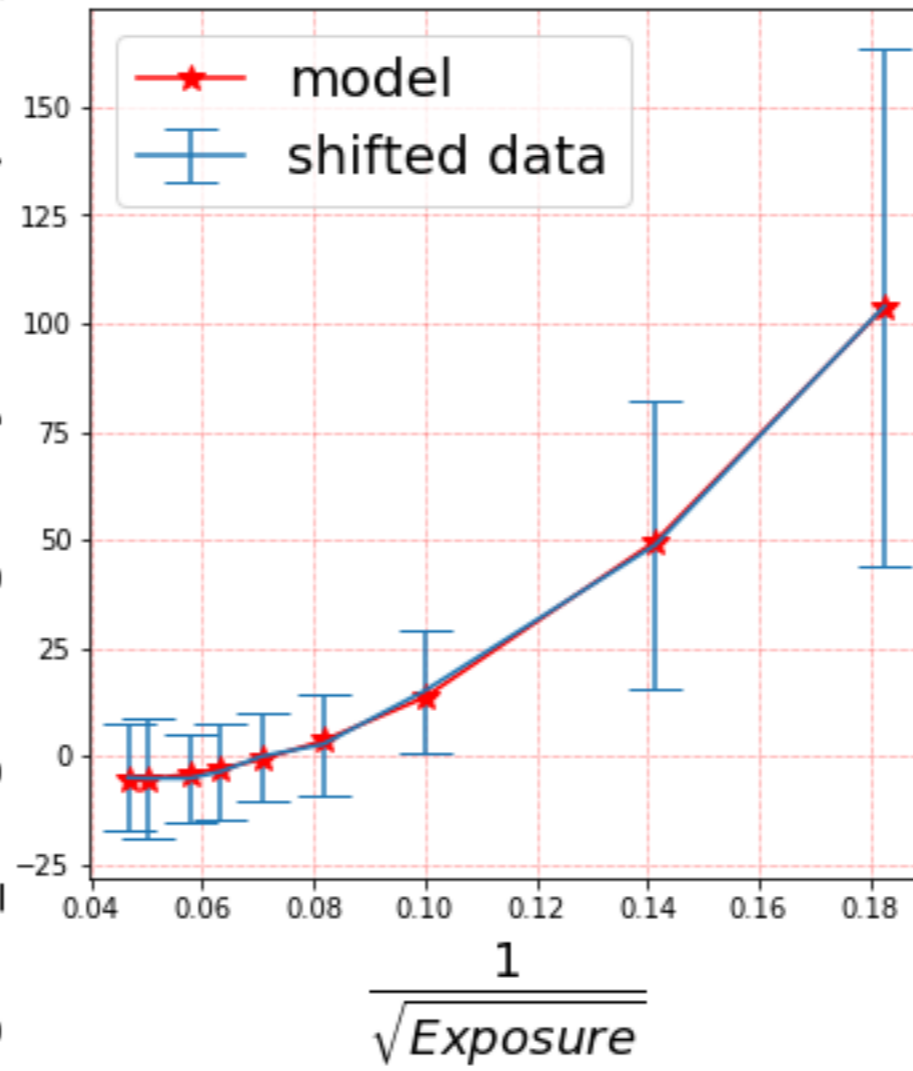

gllm\_LongRunHighGrayLevelEmphasis

Corrected data

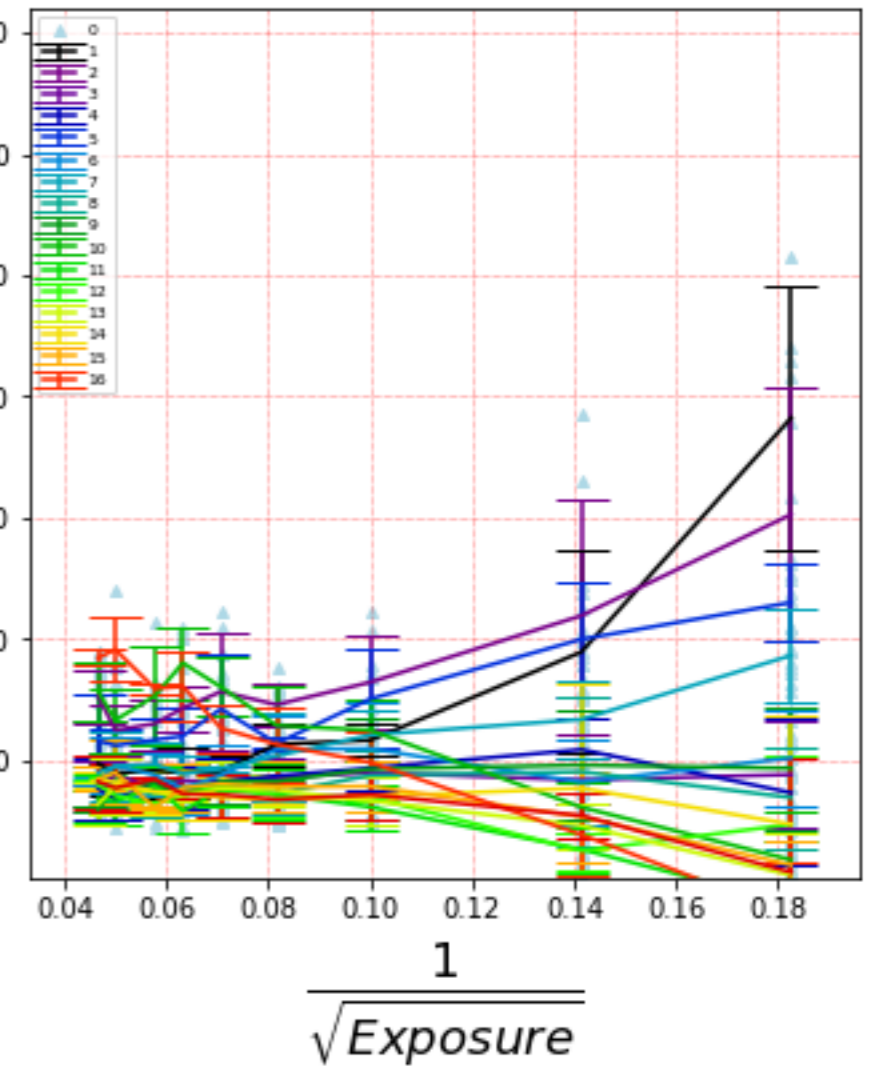

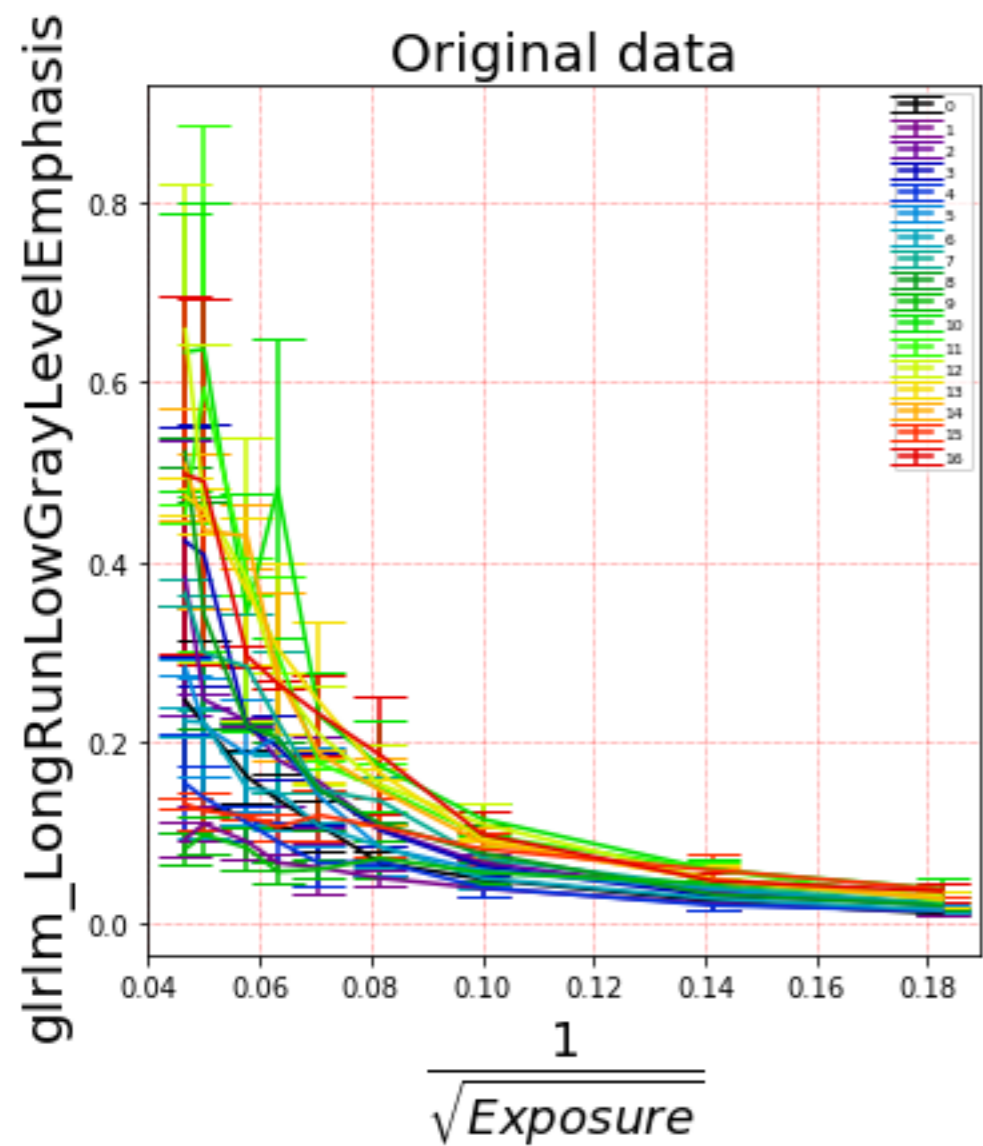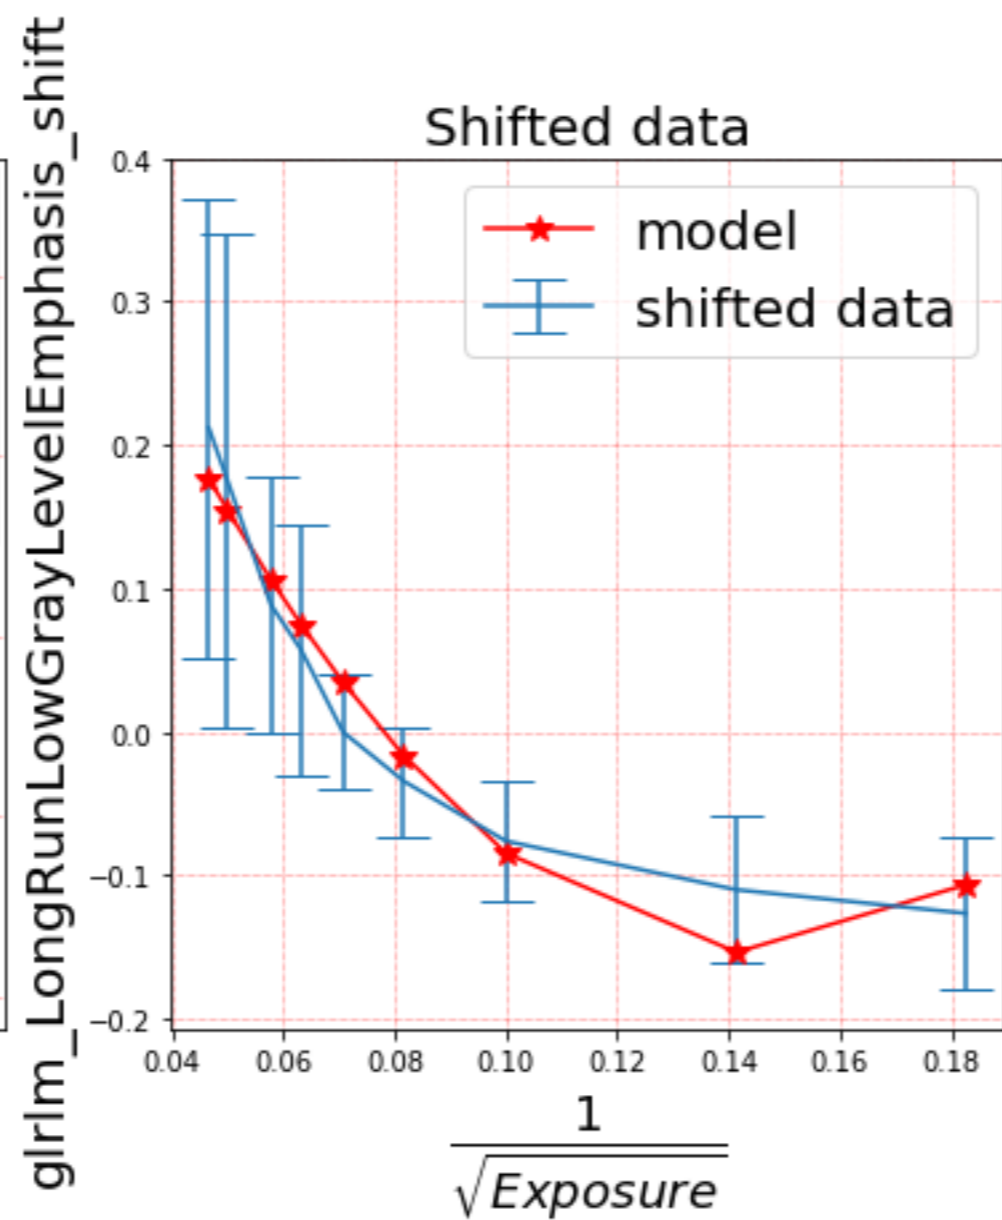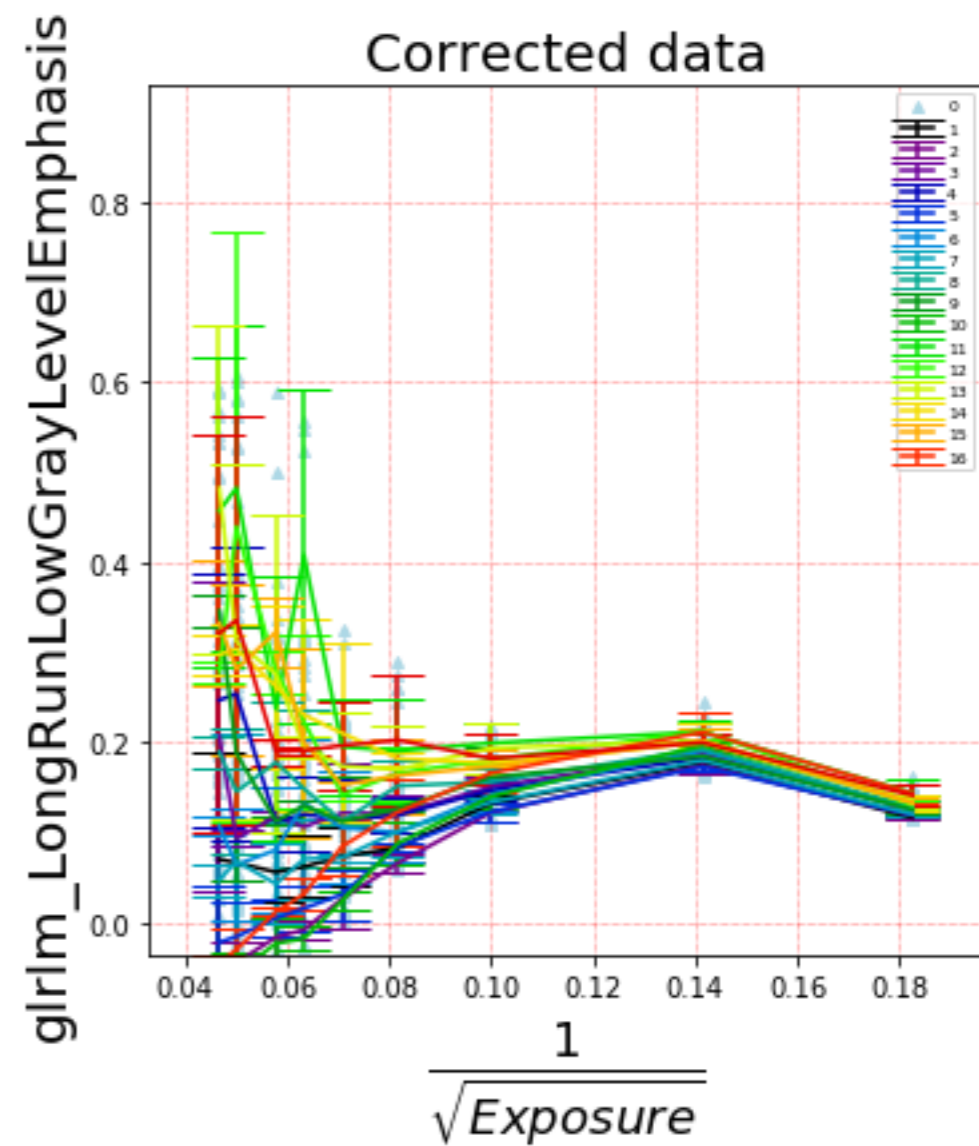



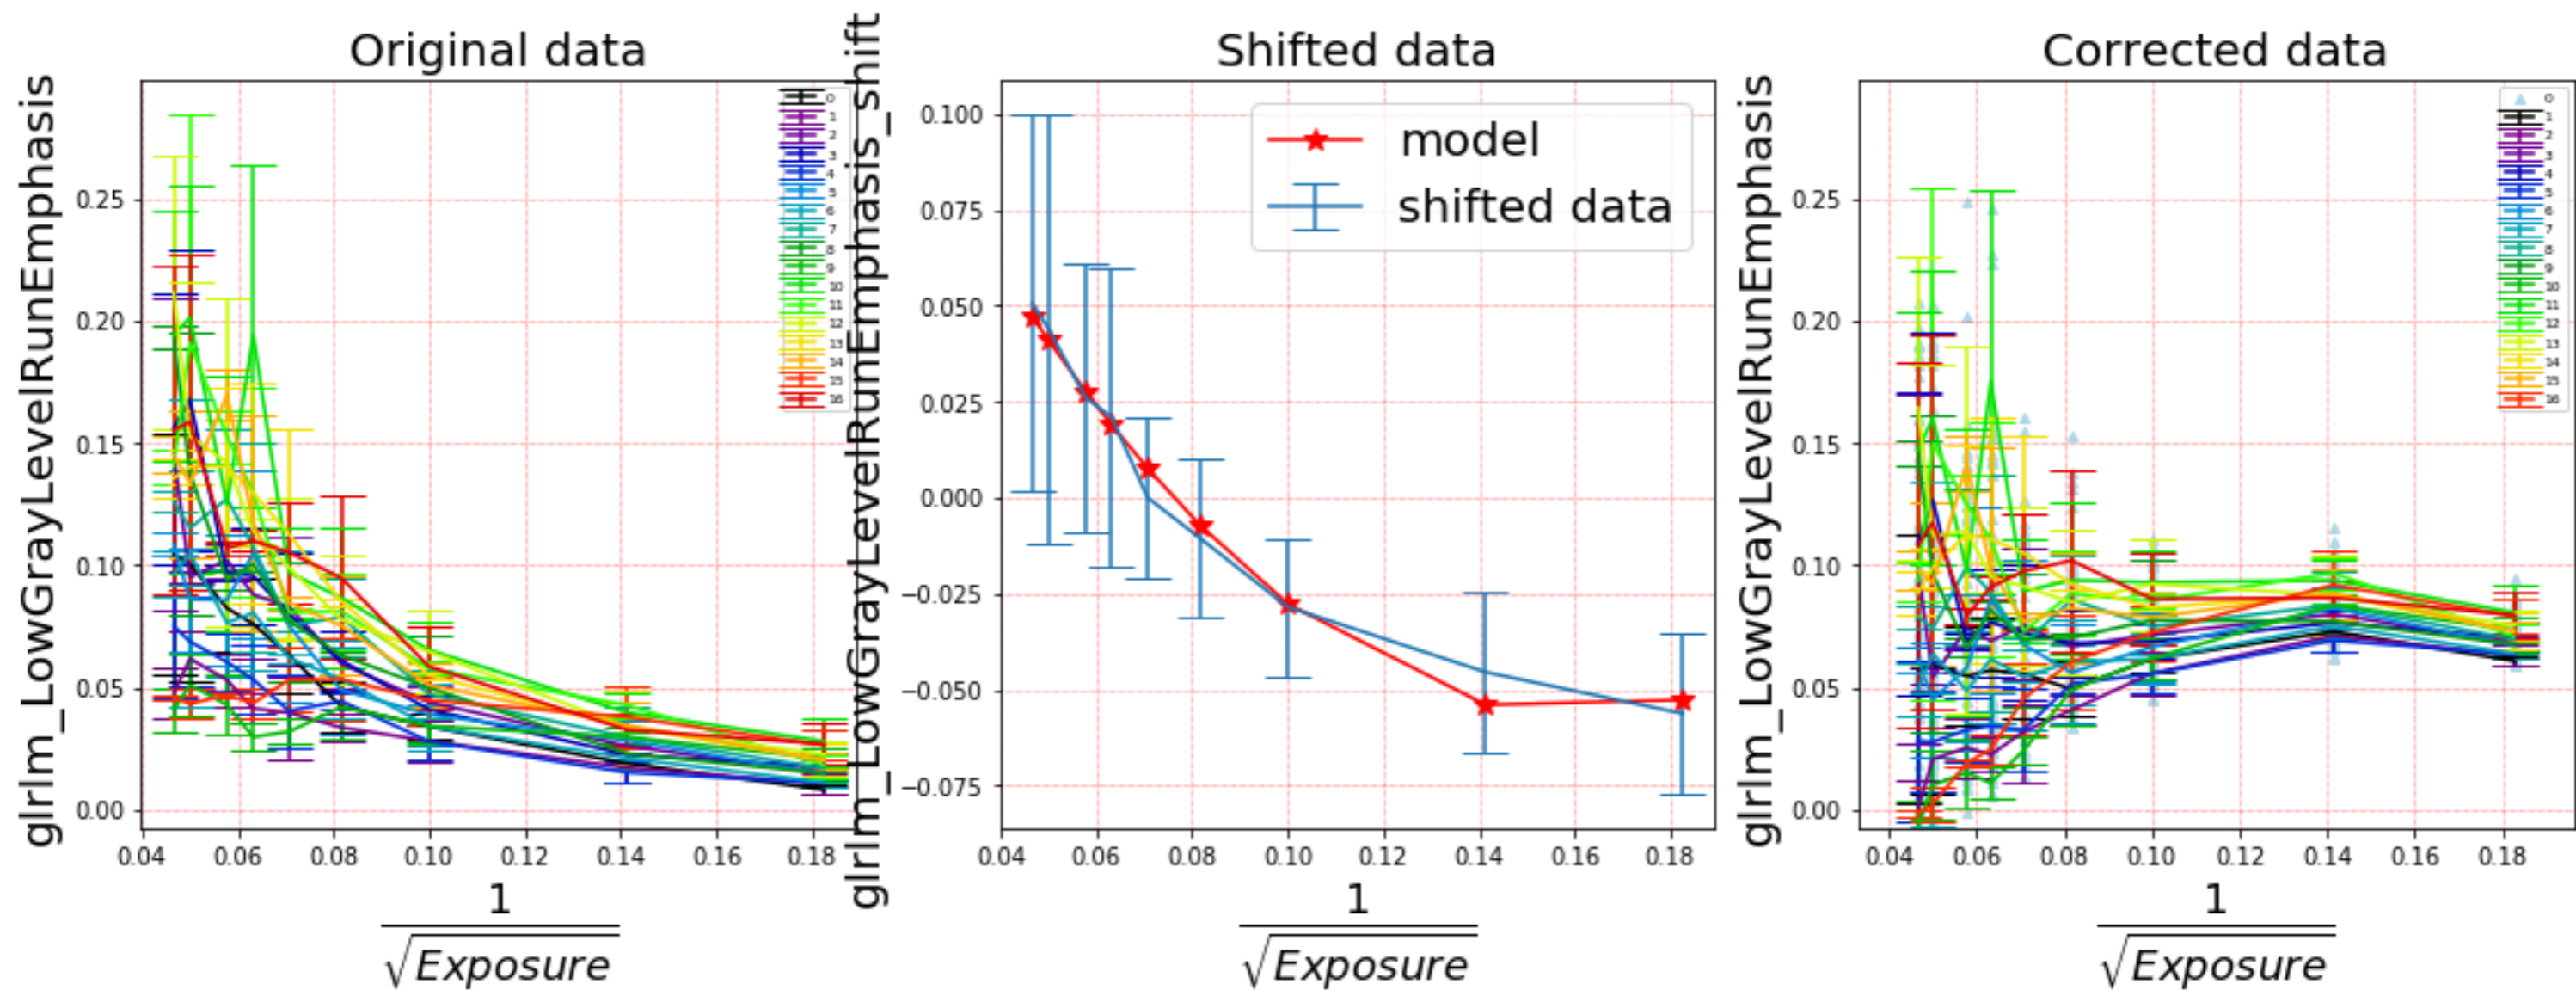



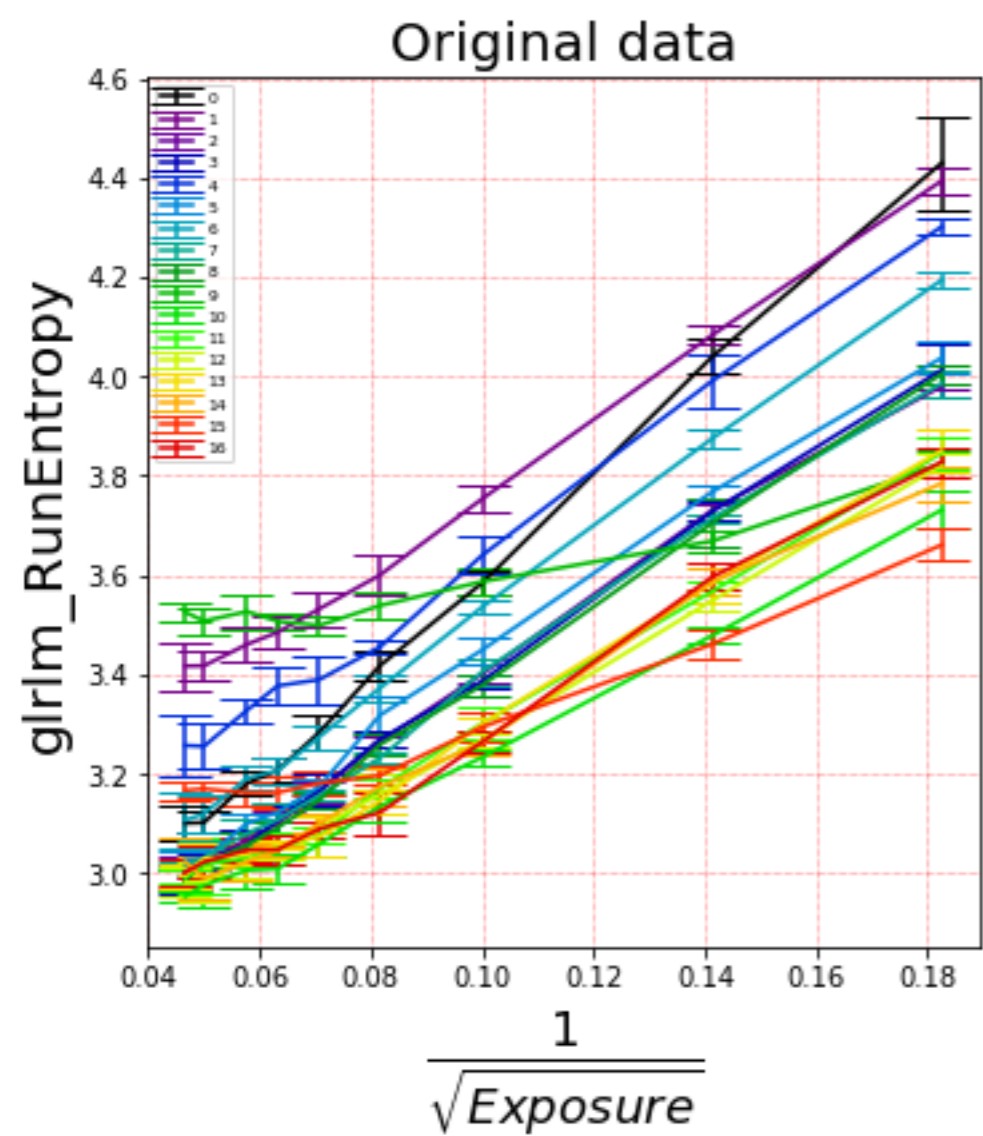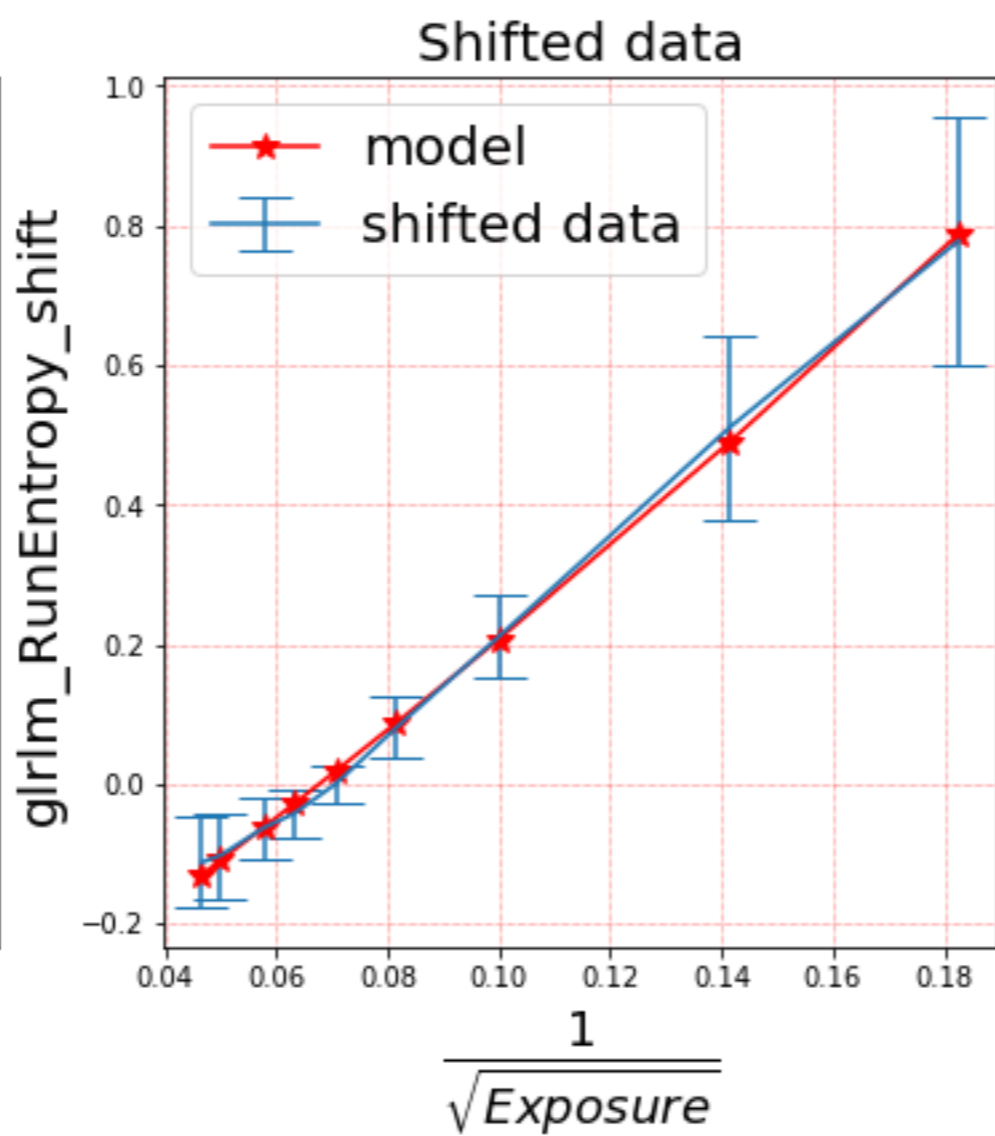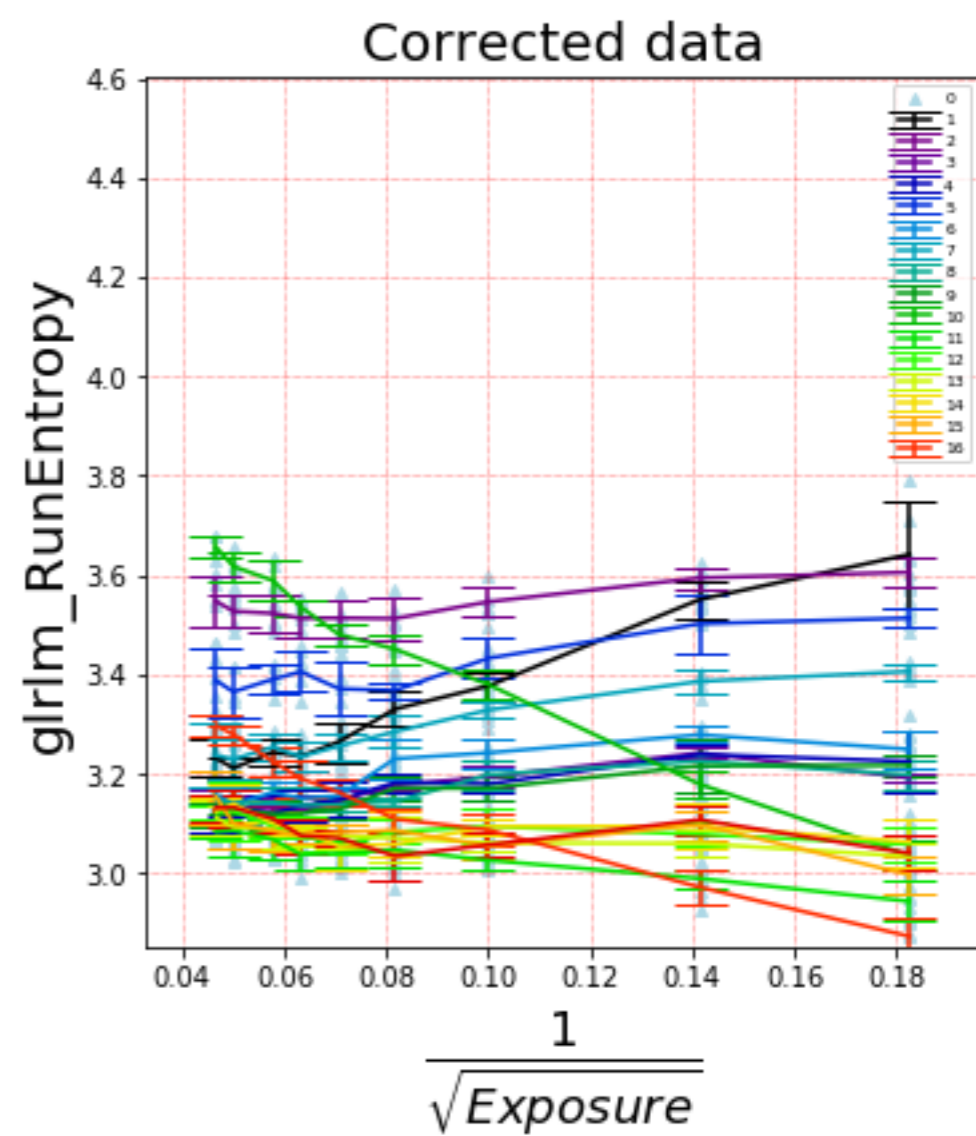

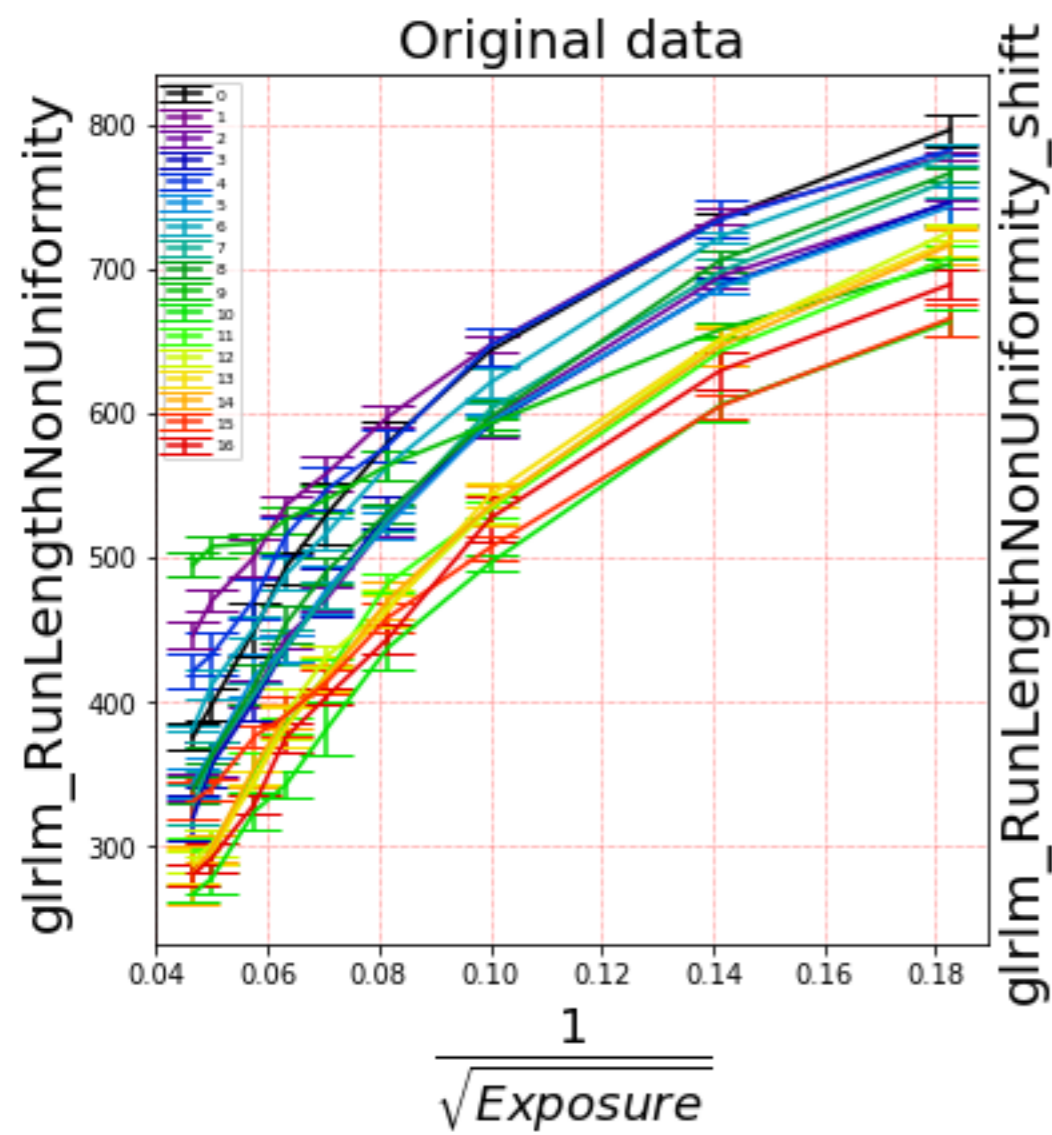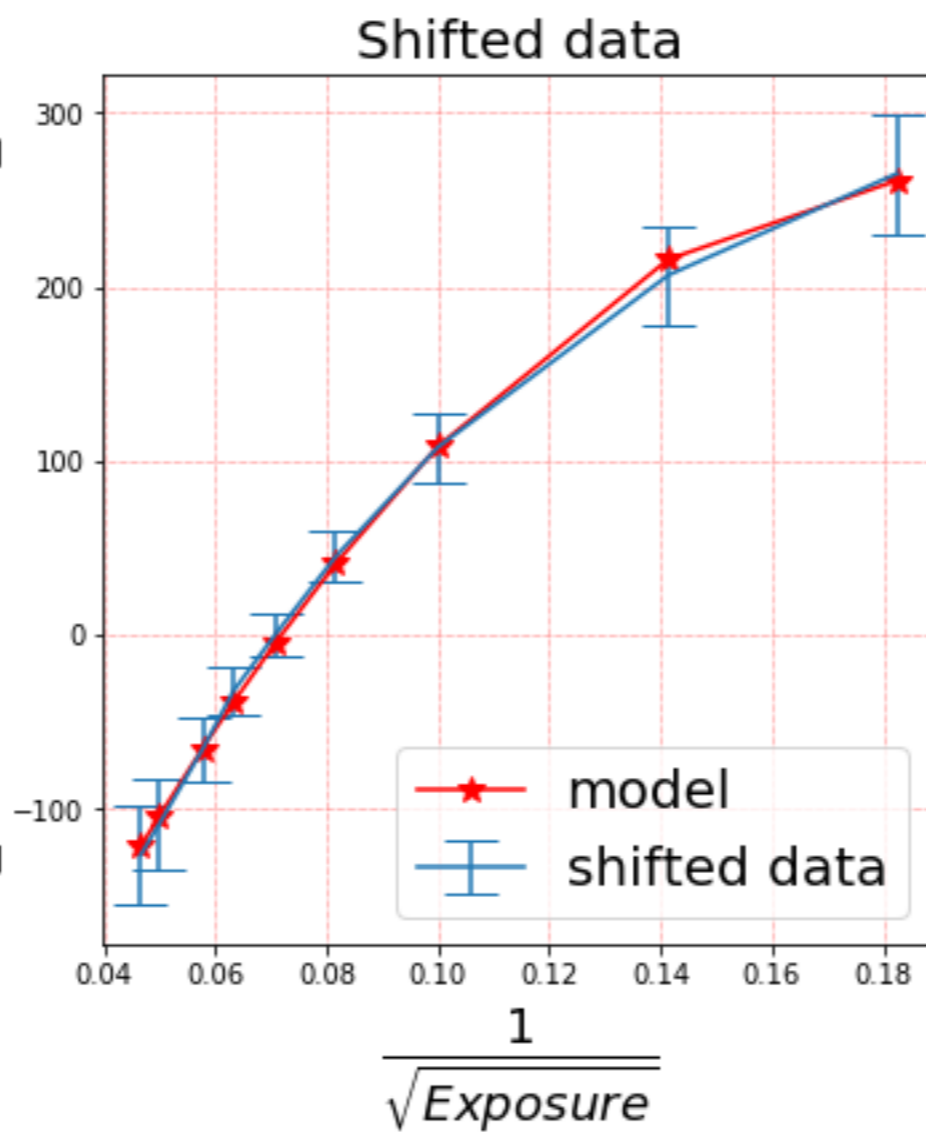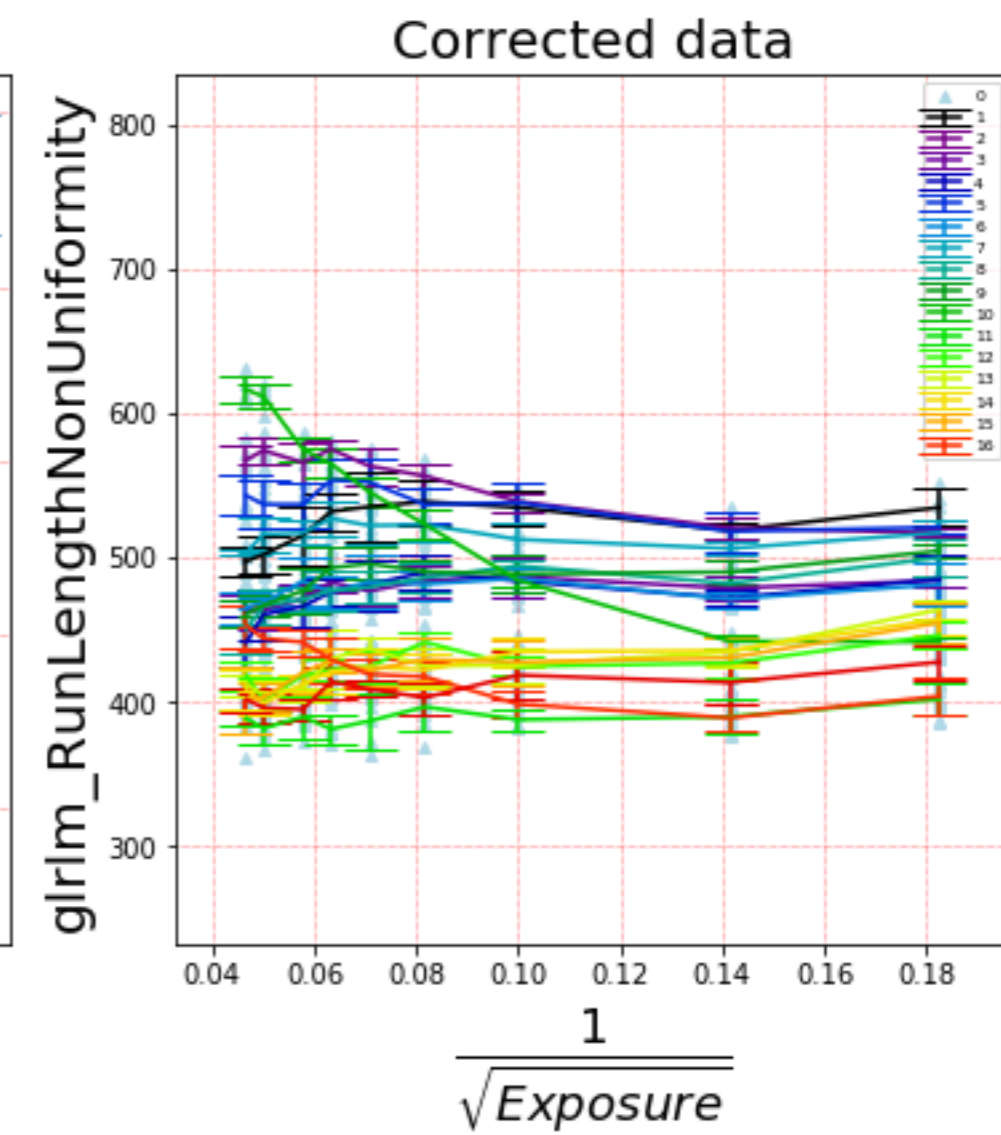

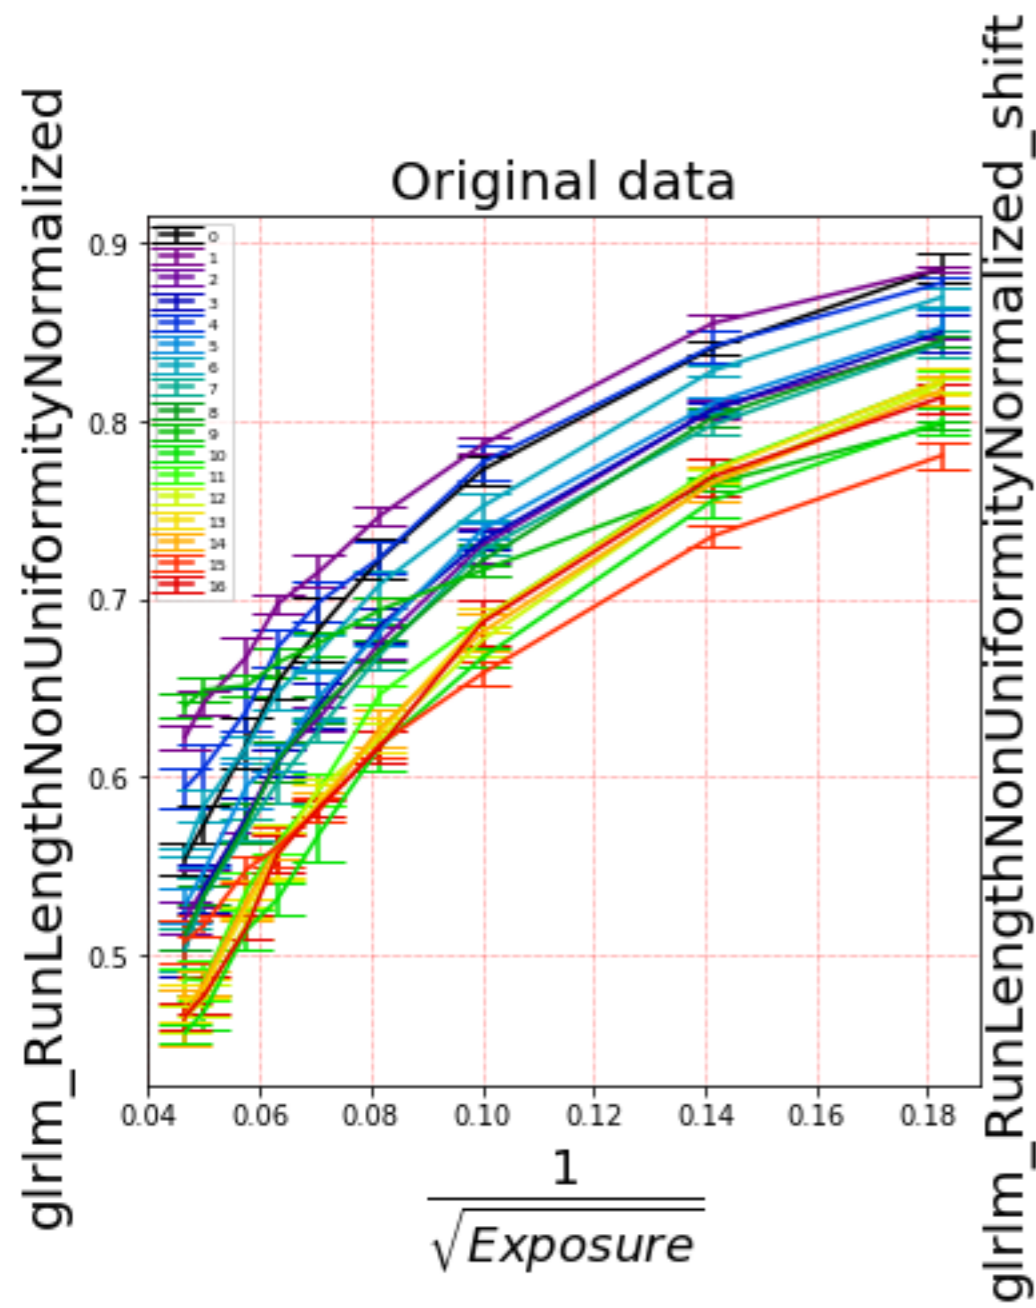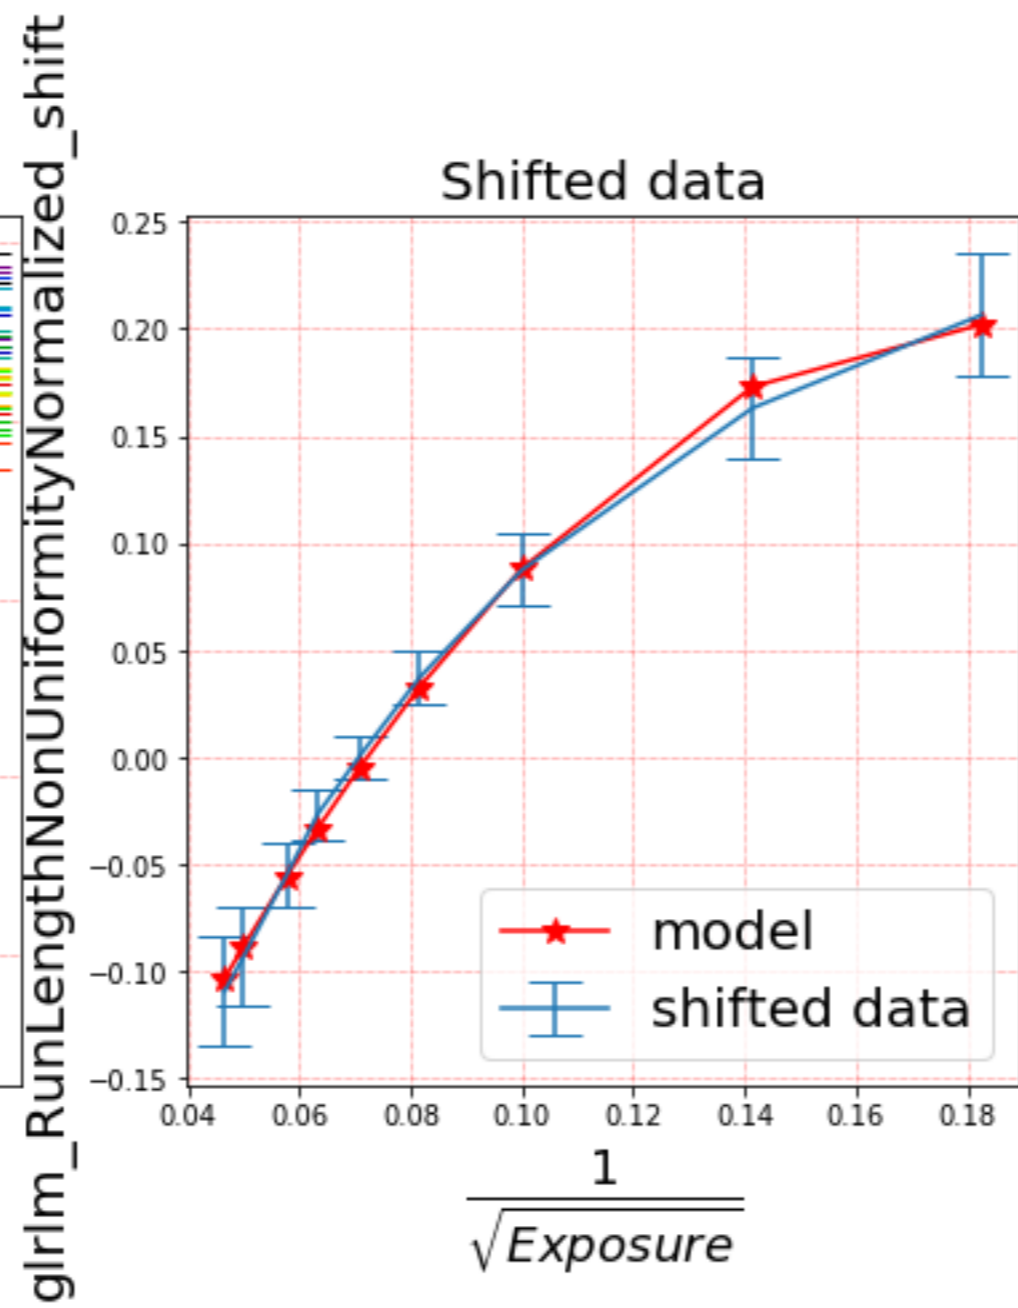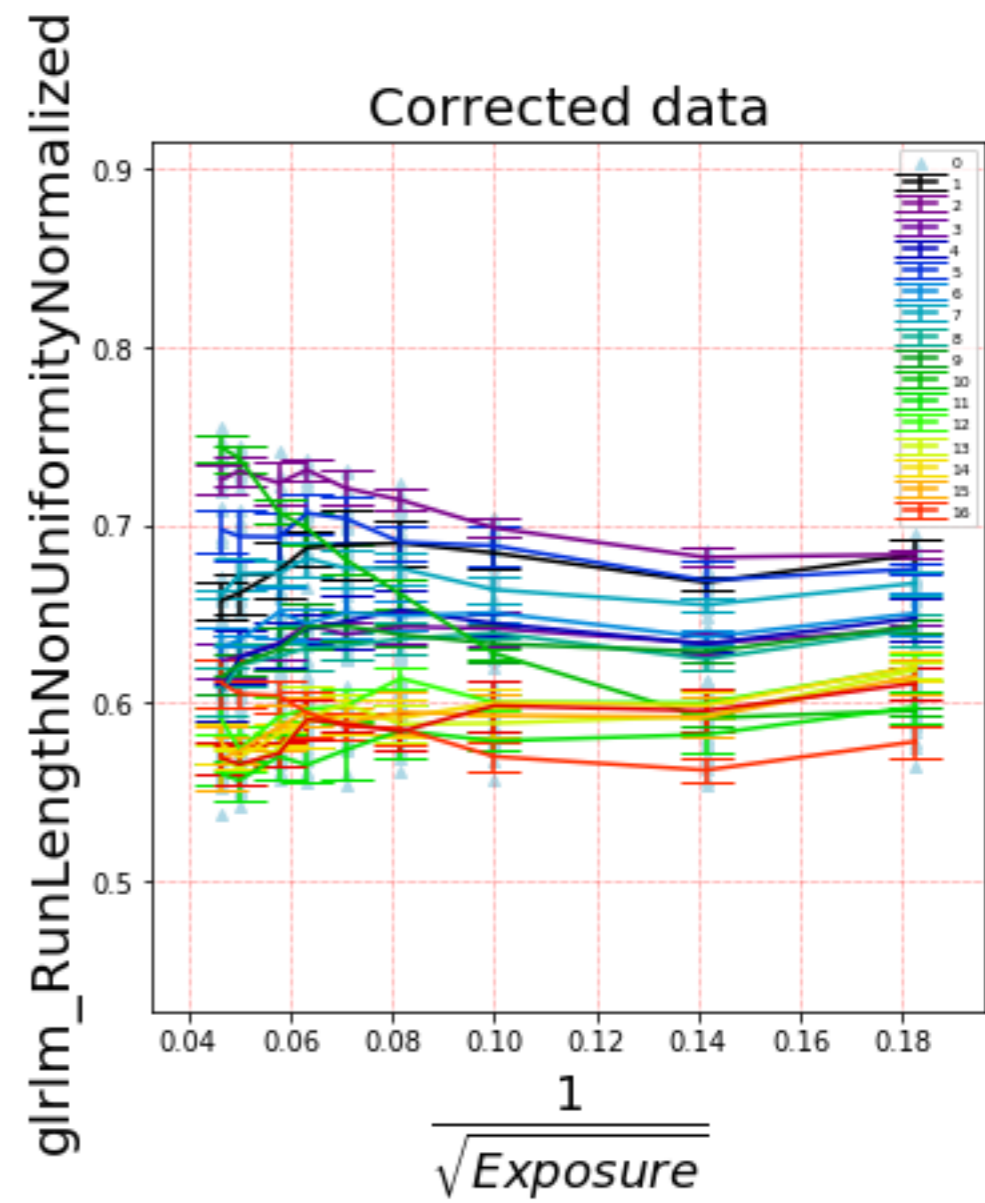



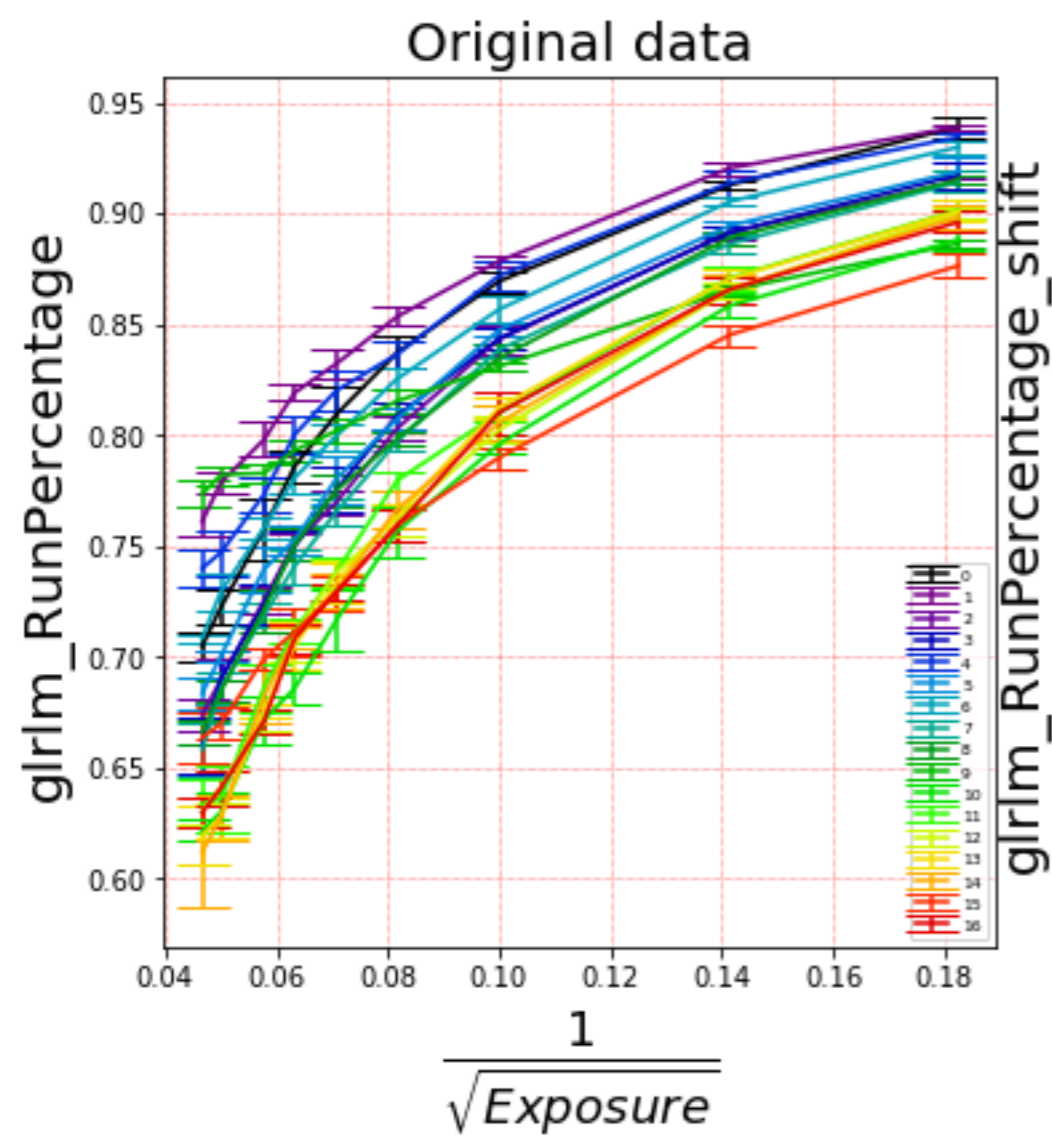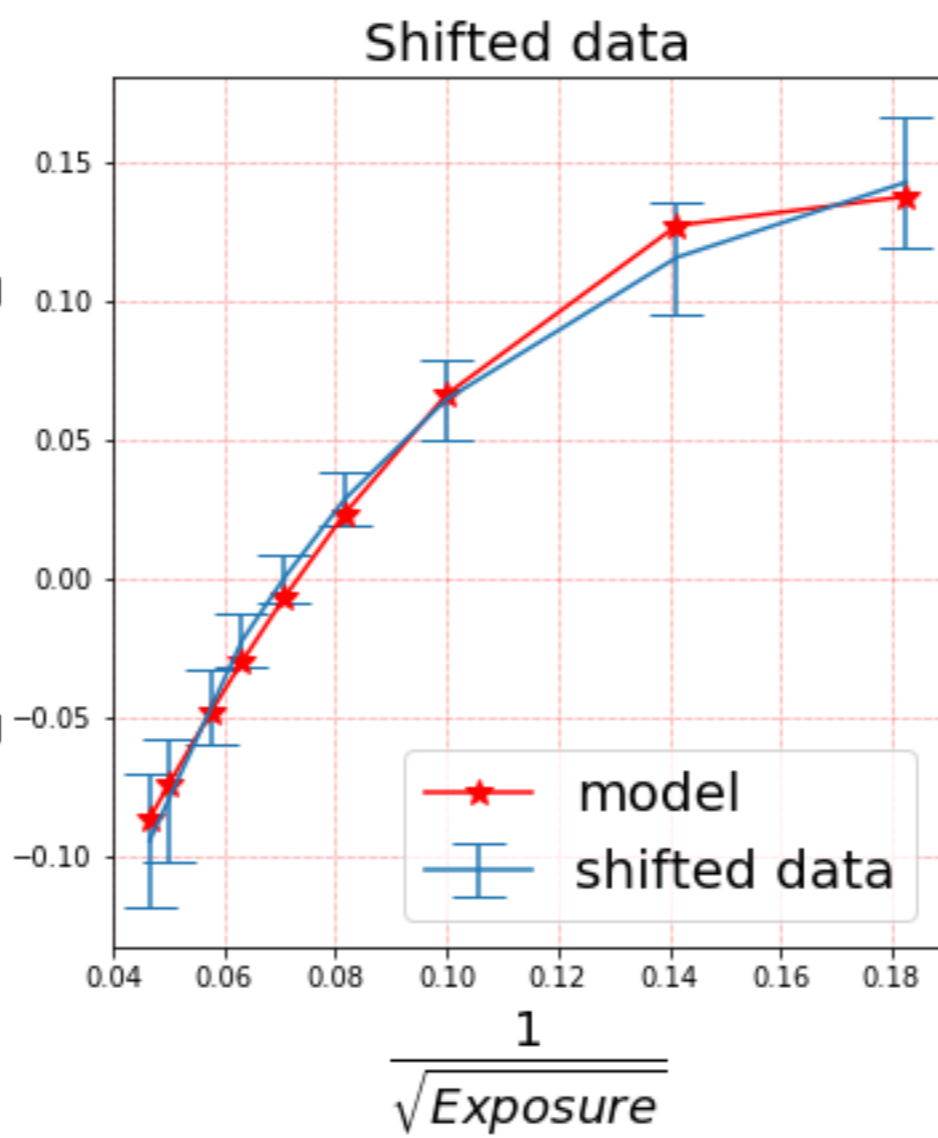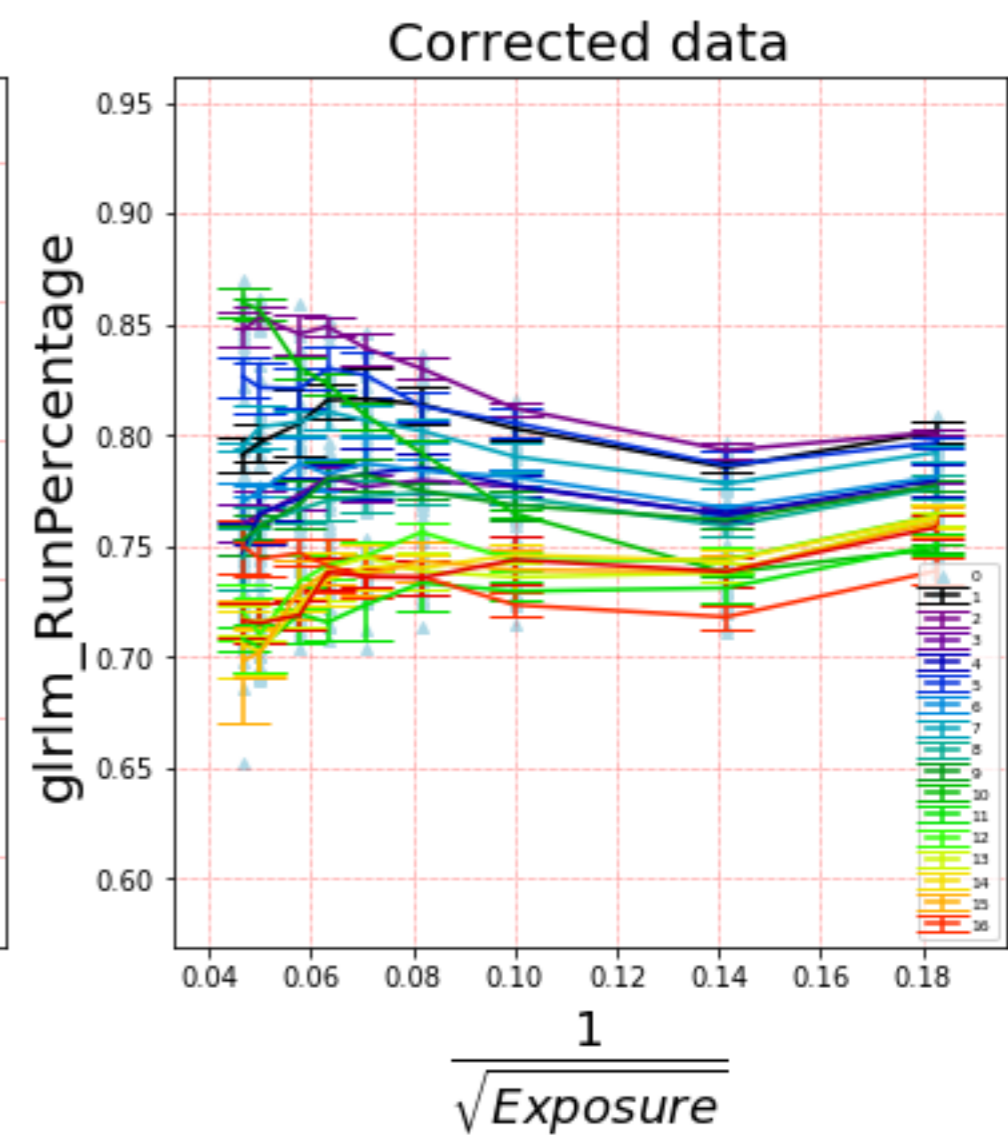



Original data

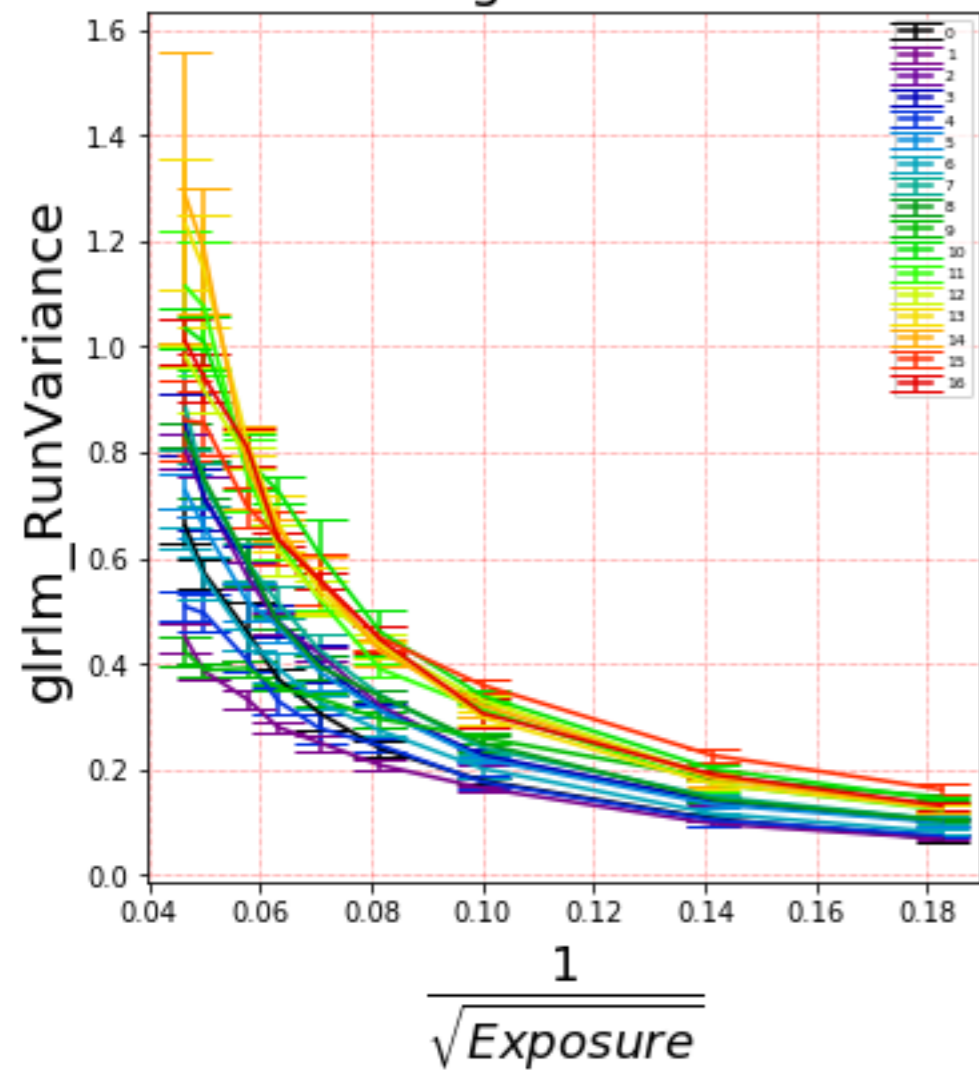

Shifted data

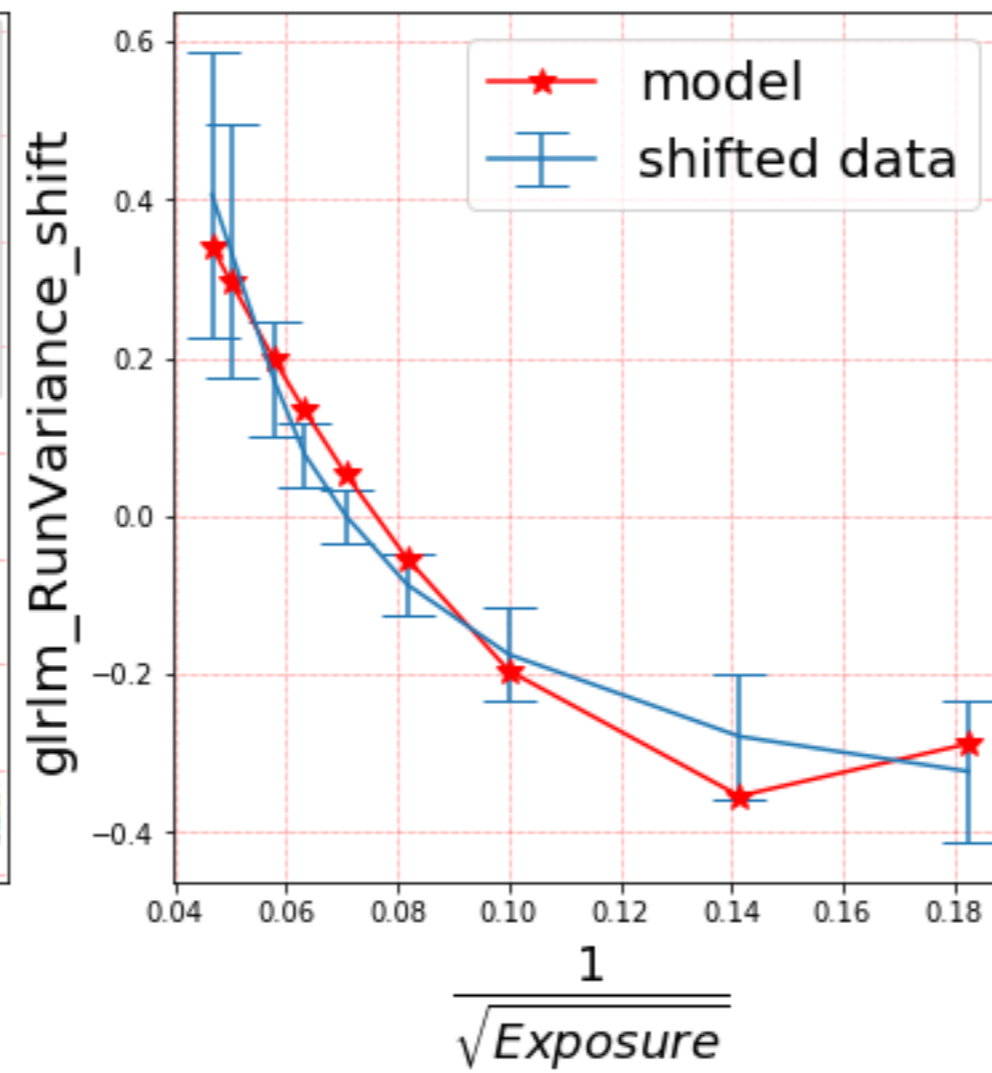

Corrected data

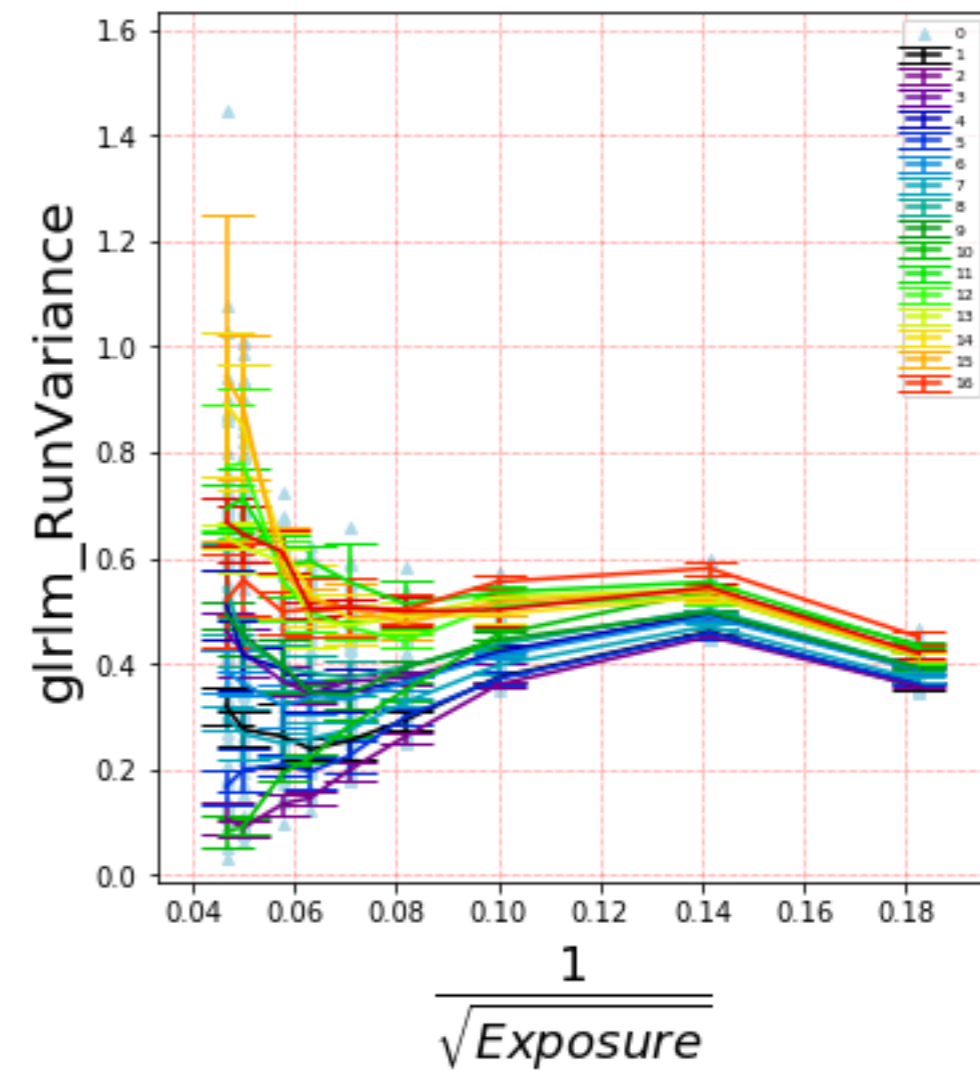

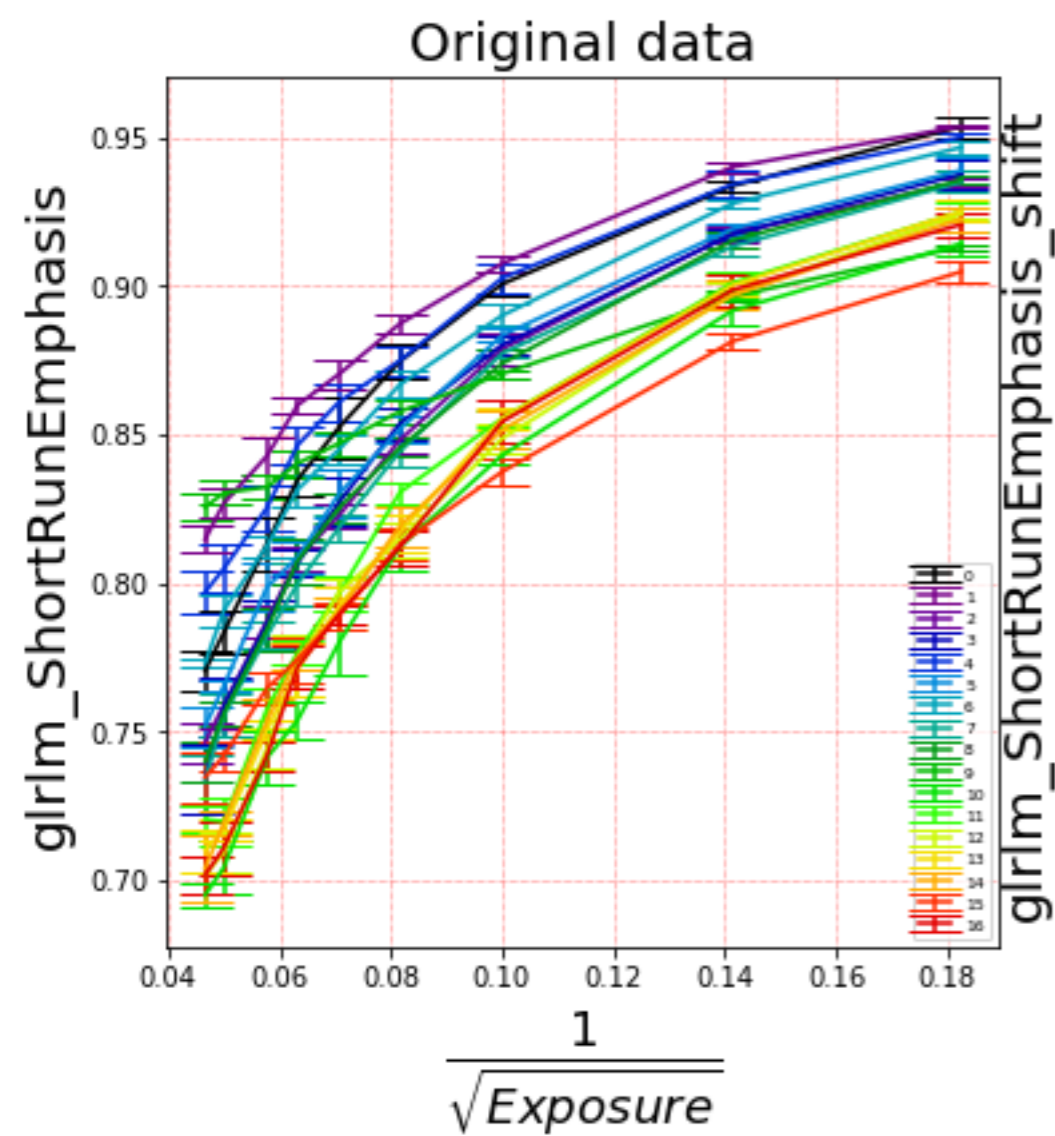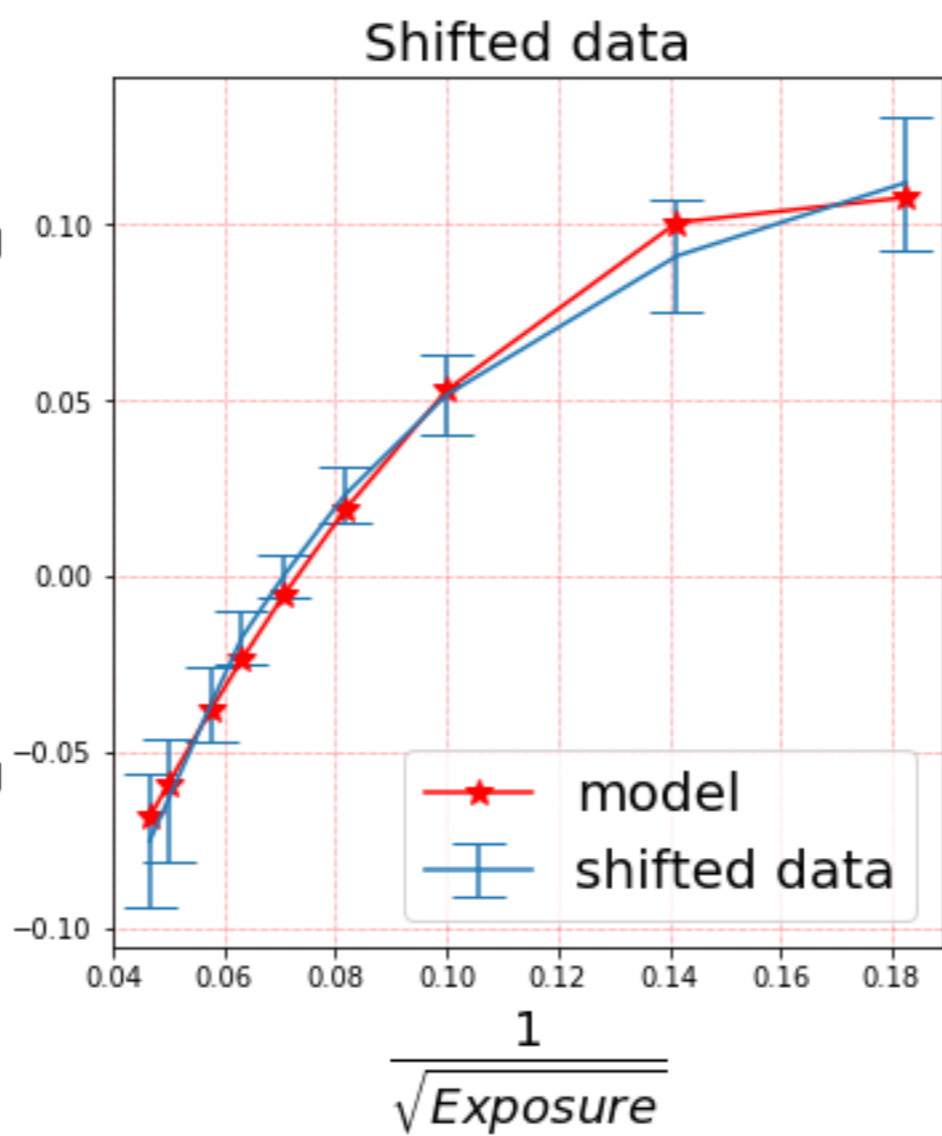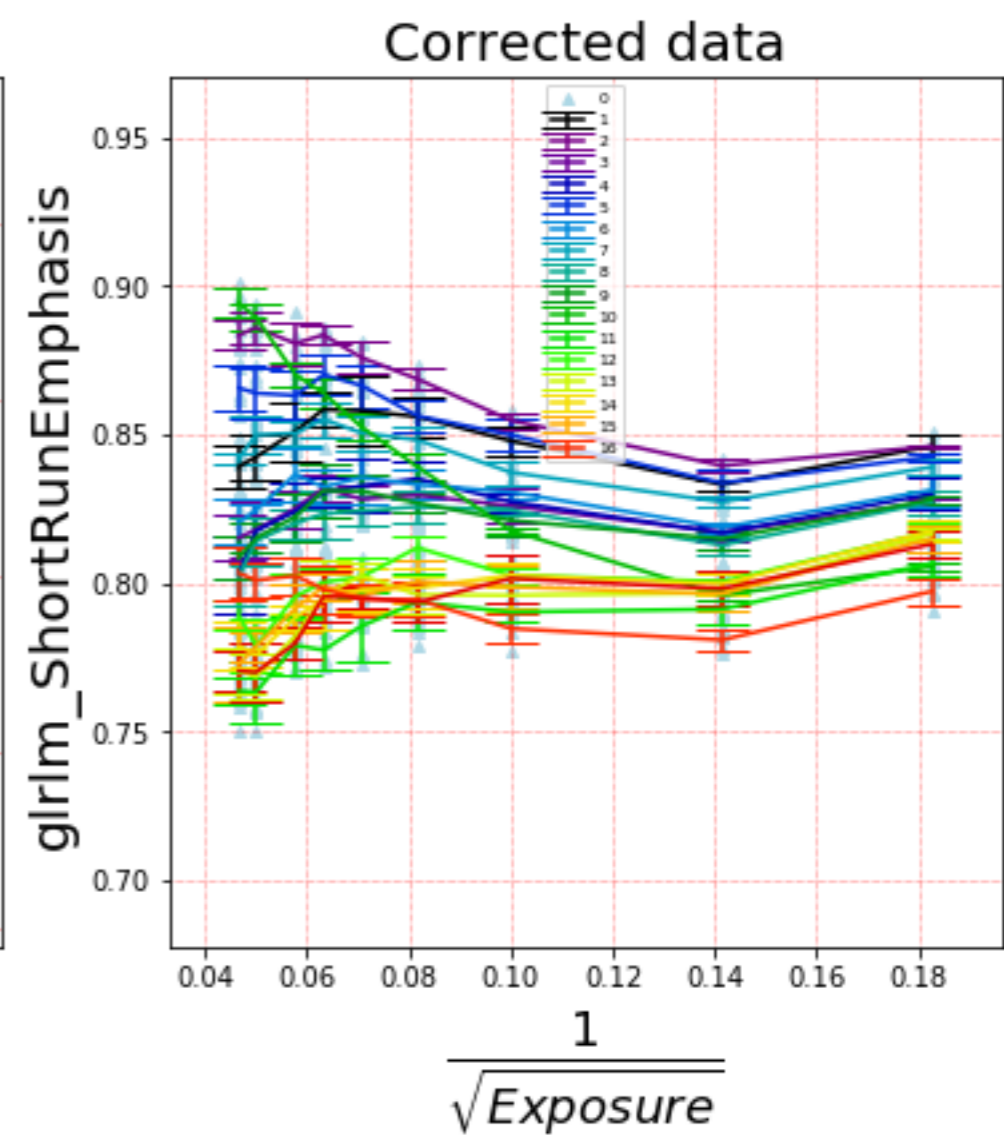

glim\_ShortRunHighGrayLevelEmphasis

Original data

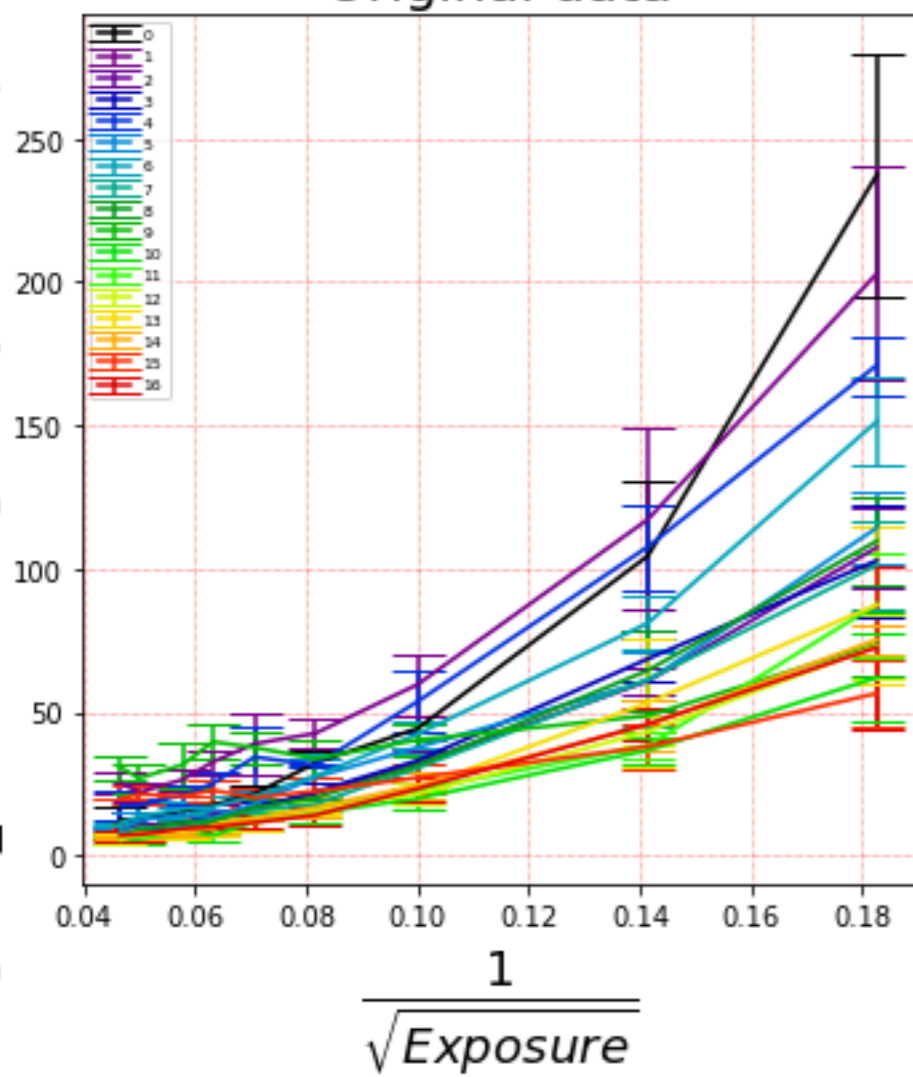

glim\_ShortRunHighGrayLevelEmphasis\_shift

Shifted data

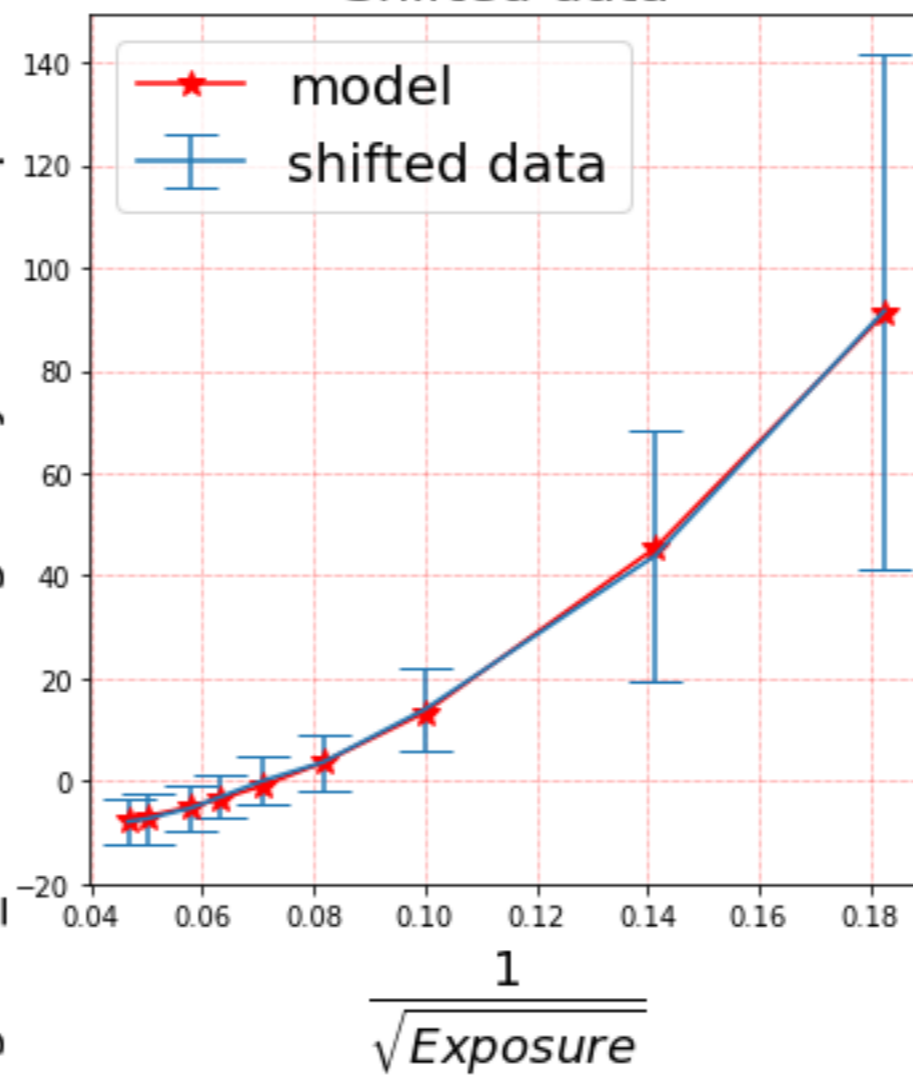

glim\_ShortRunHighGrayLevelEmphasis

Corrected data

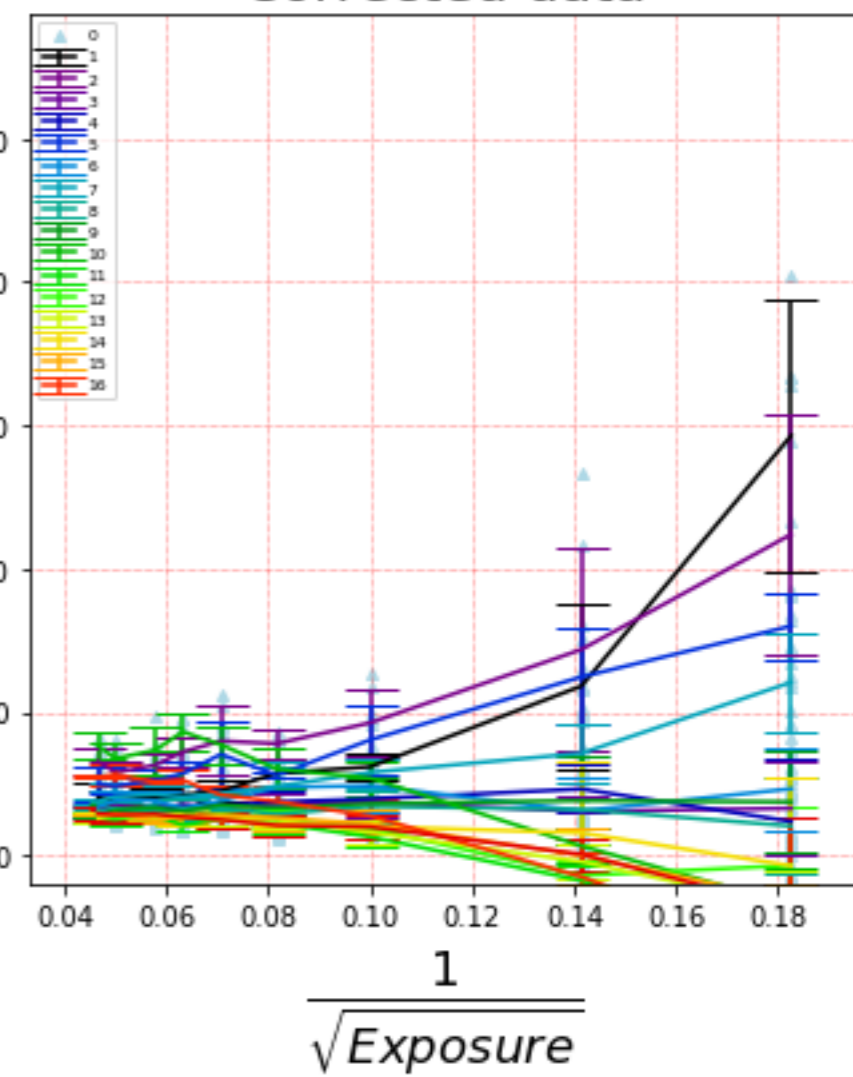

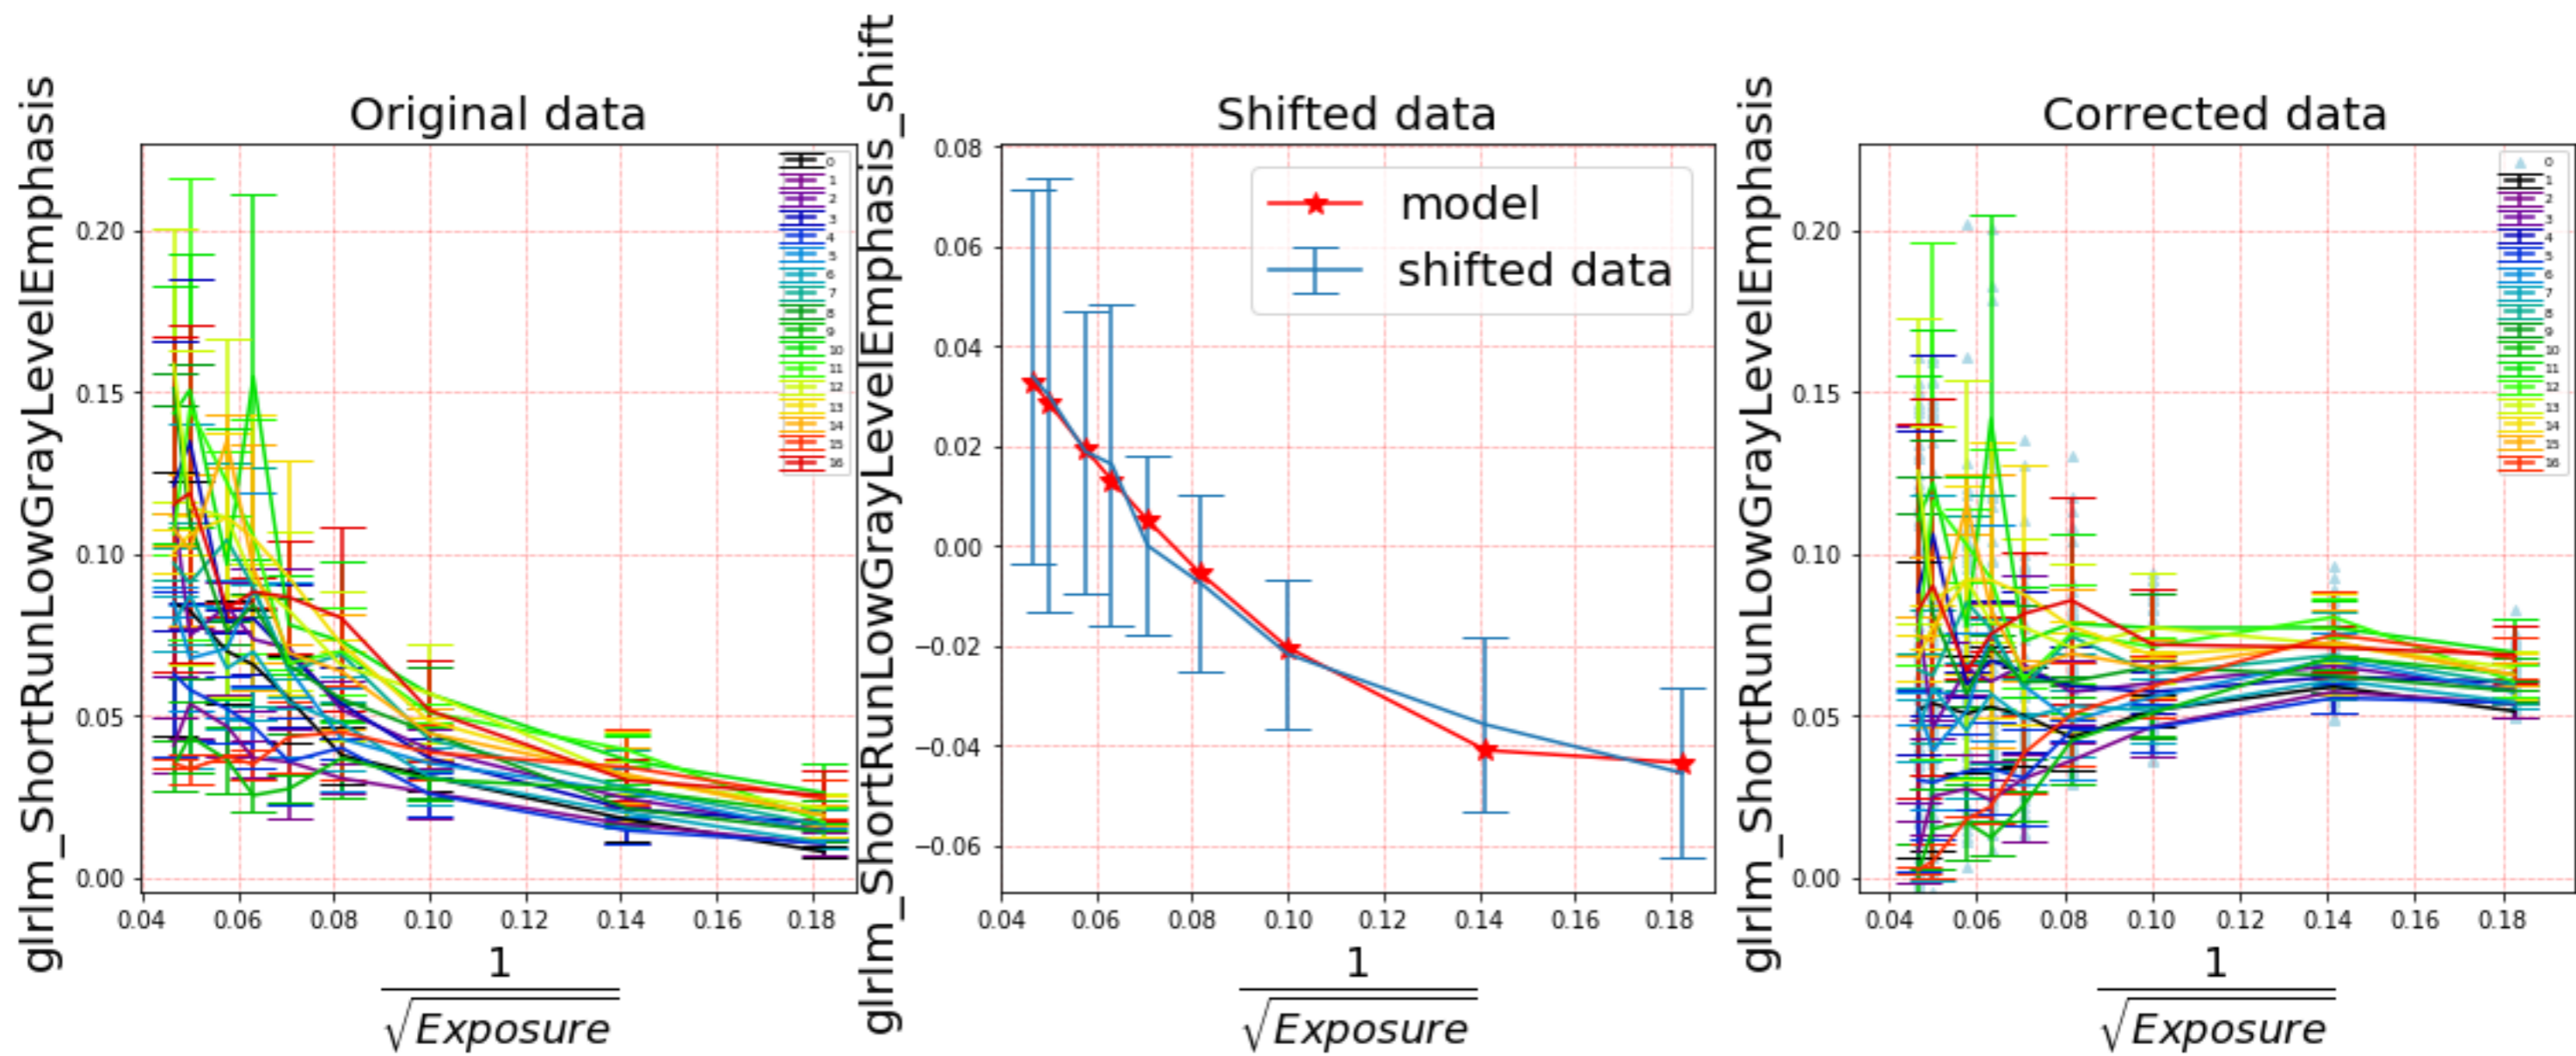



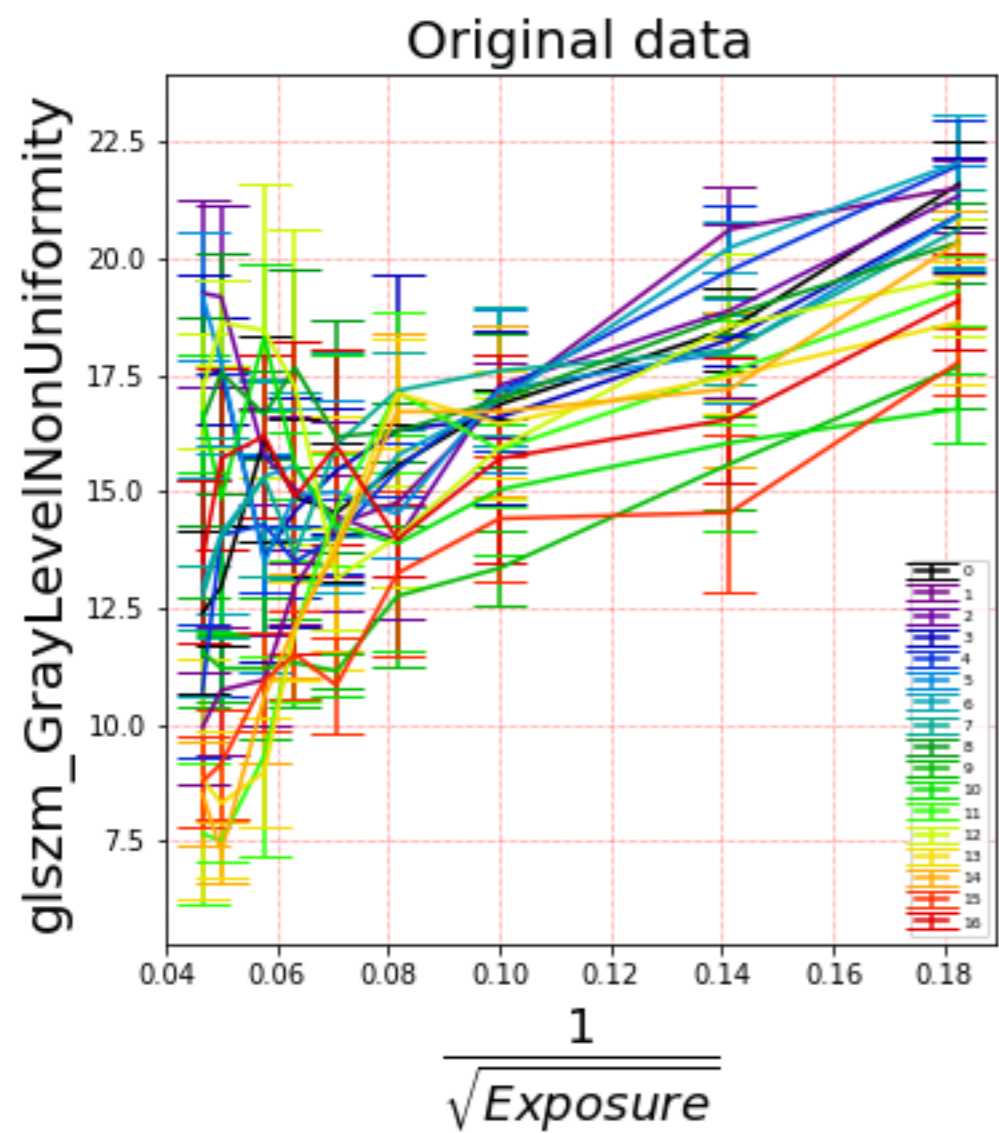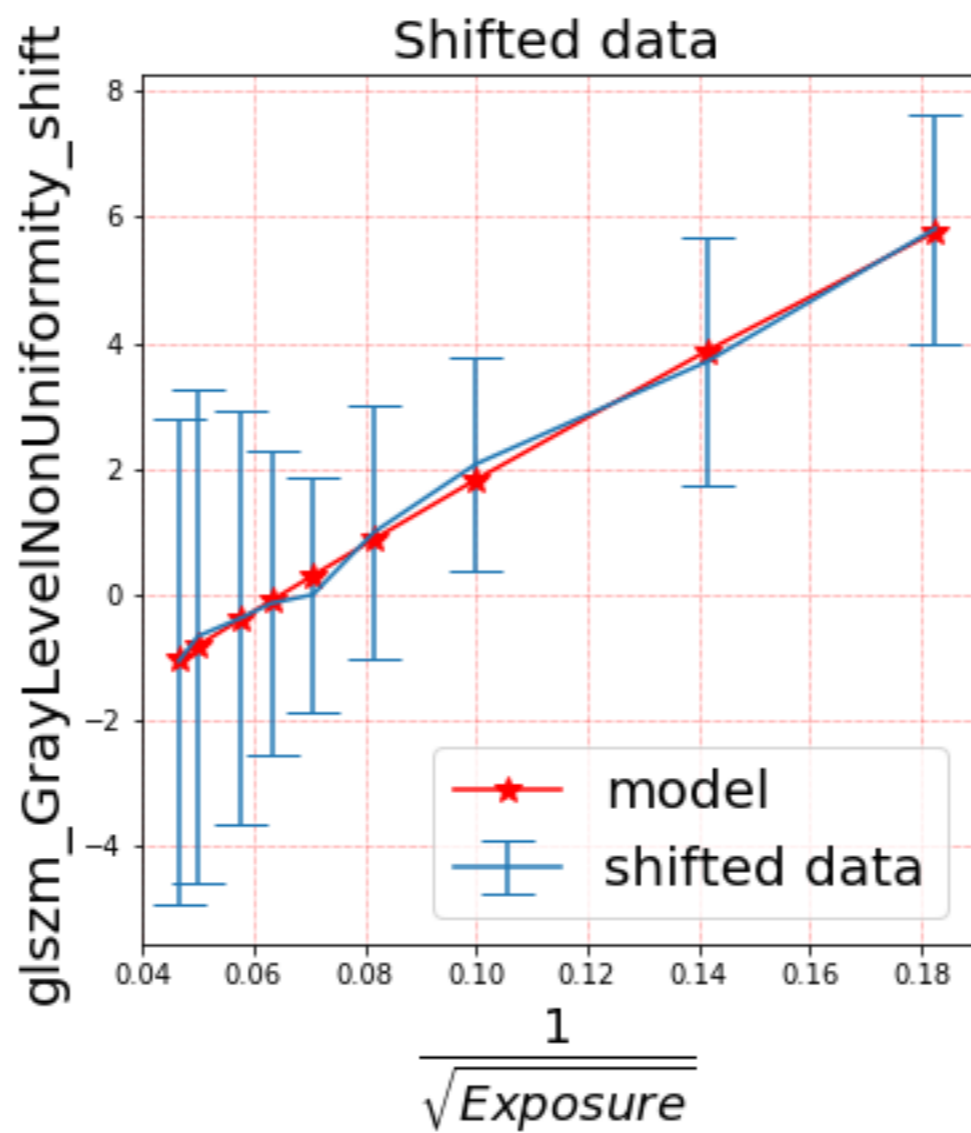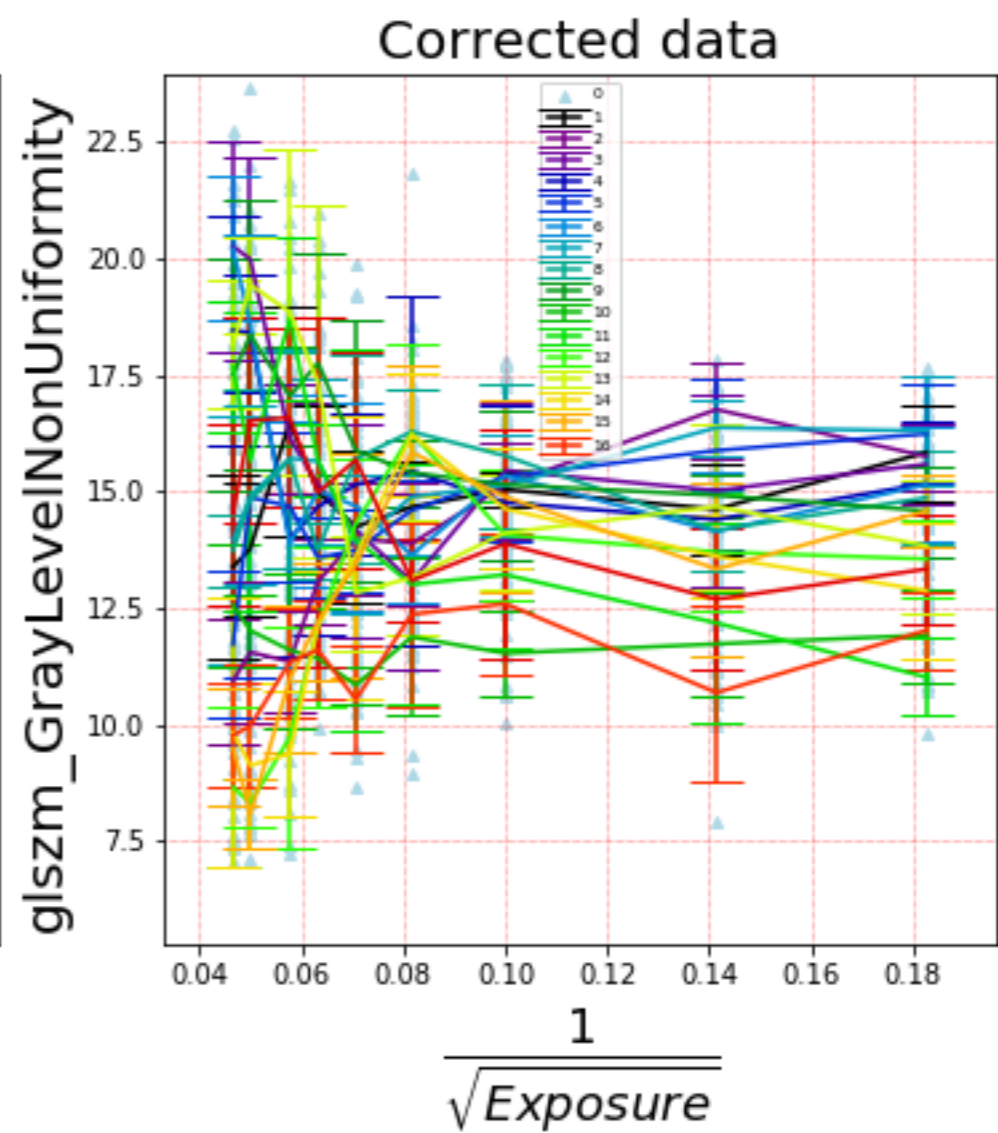

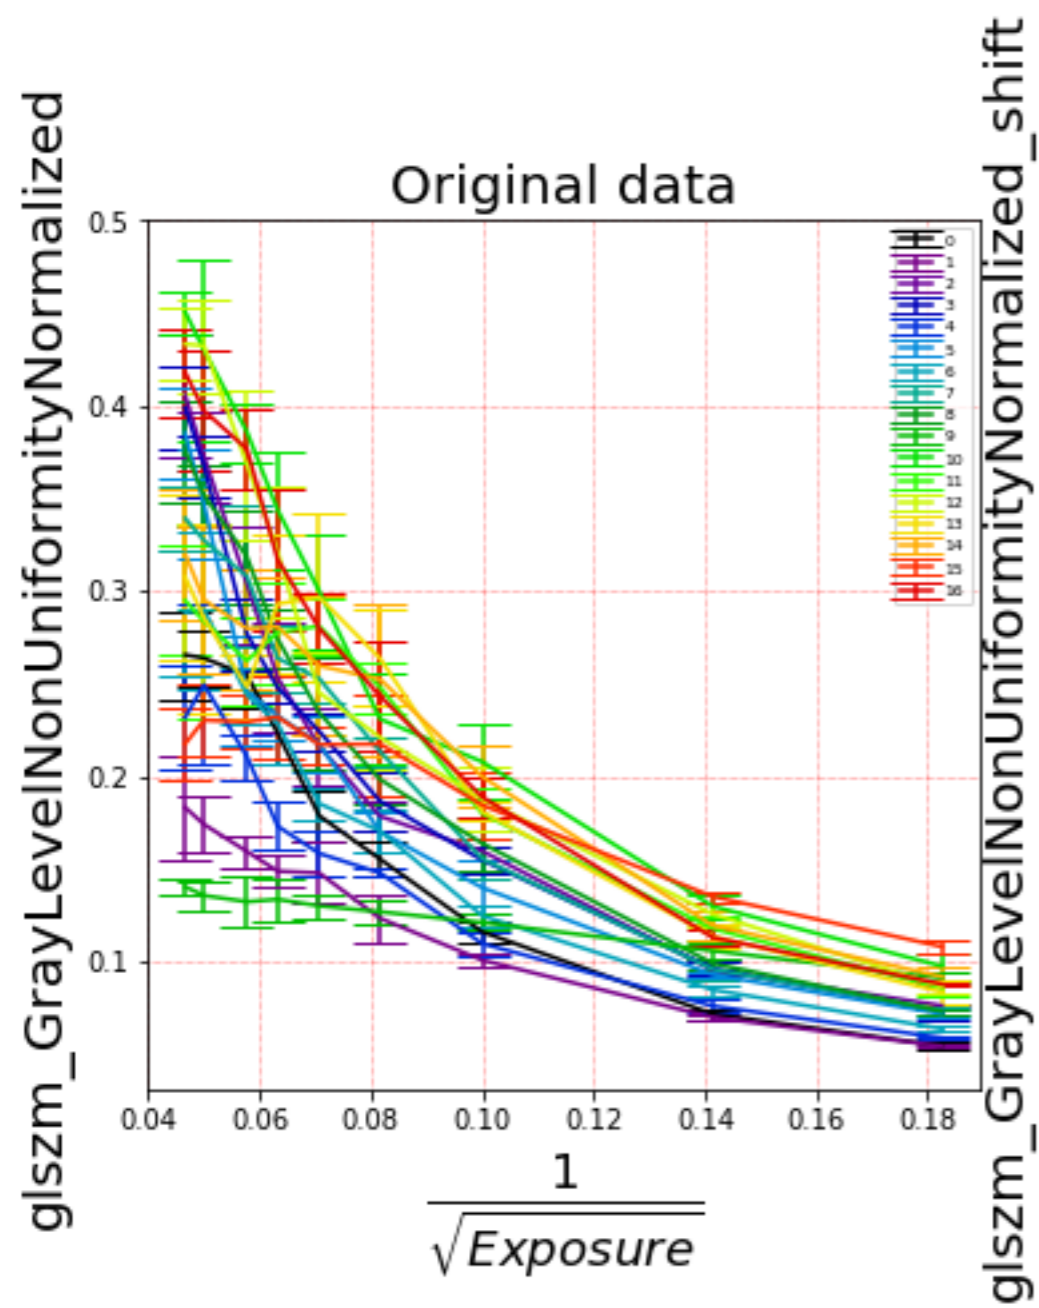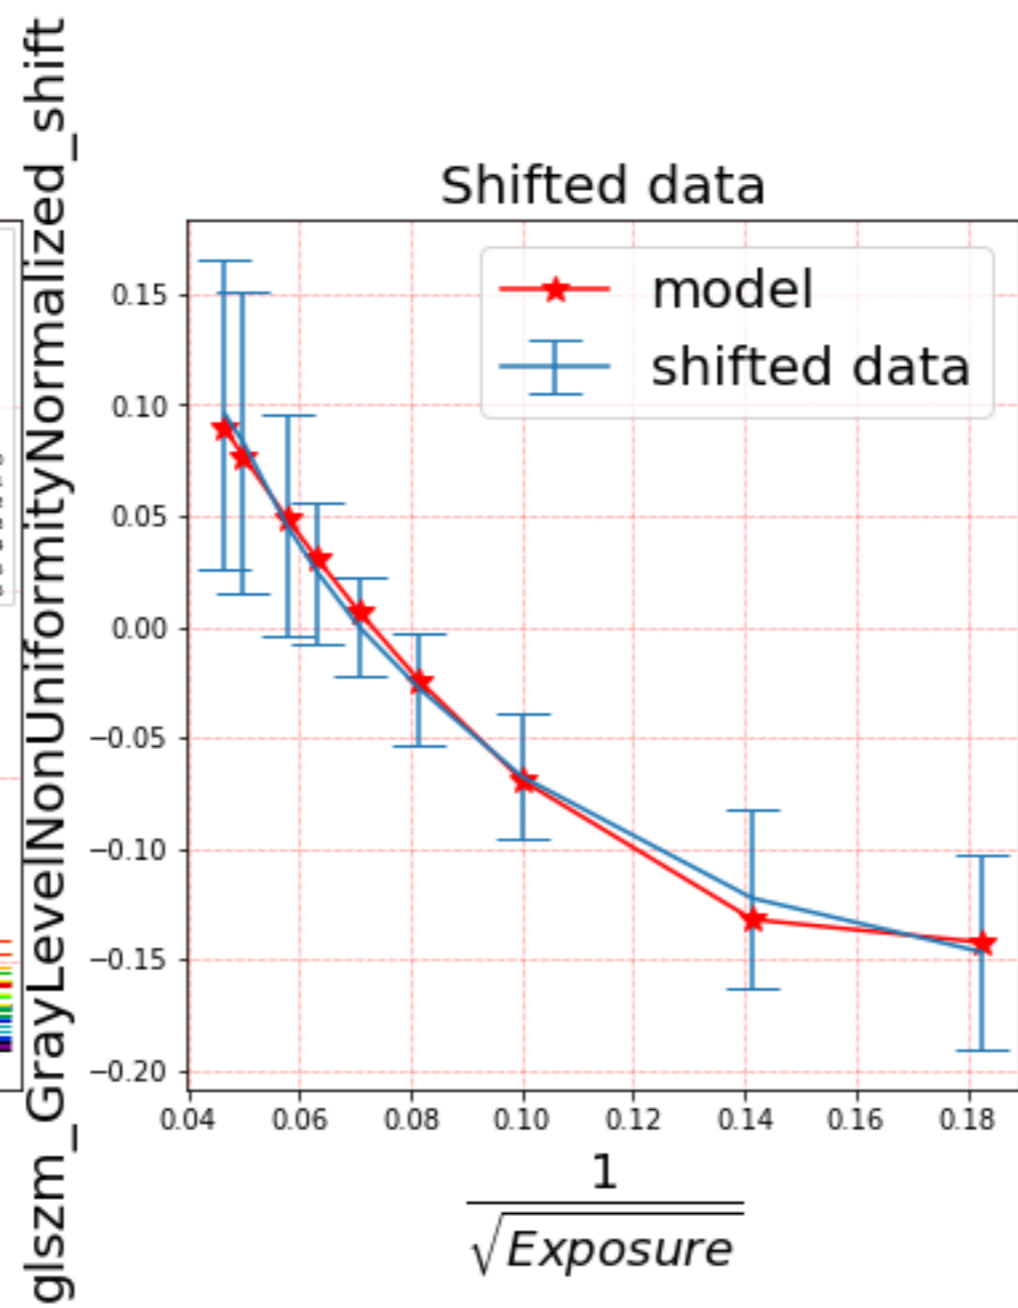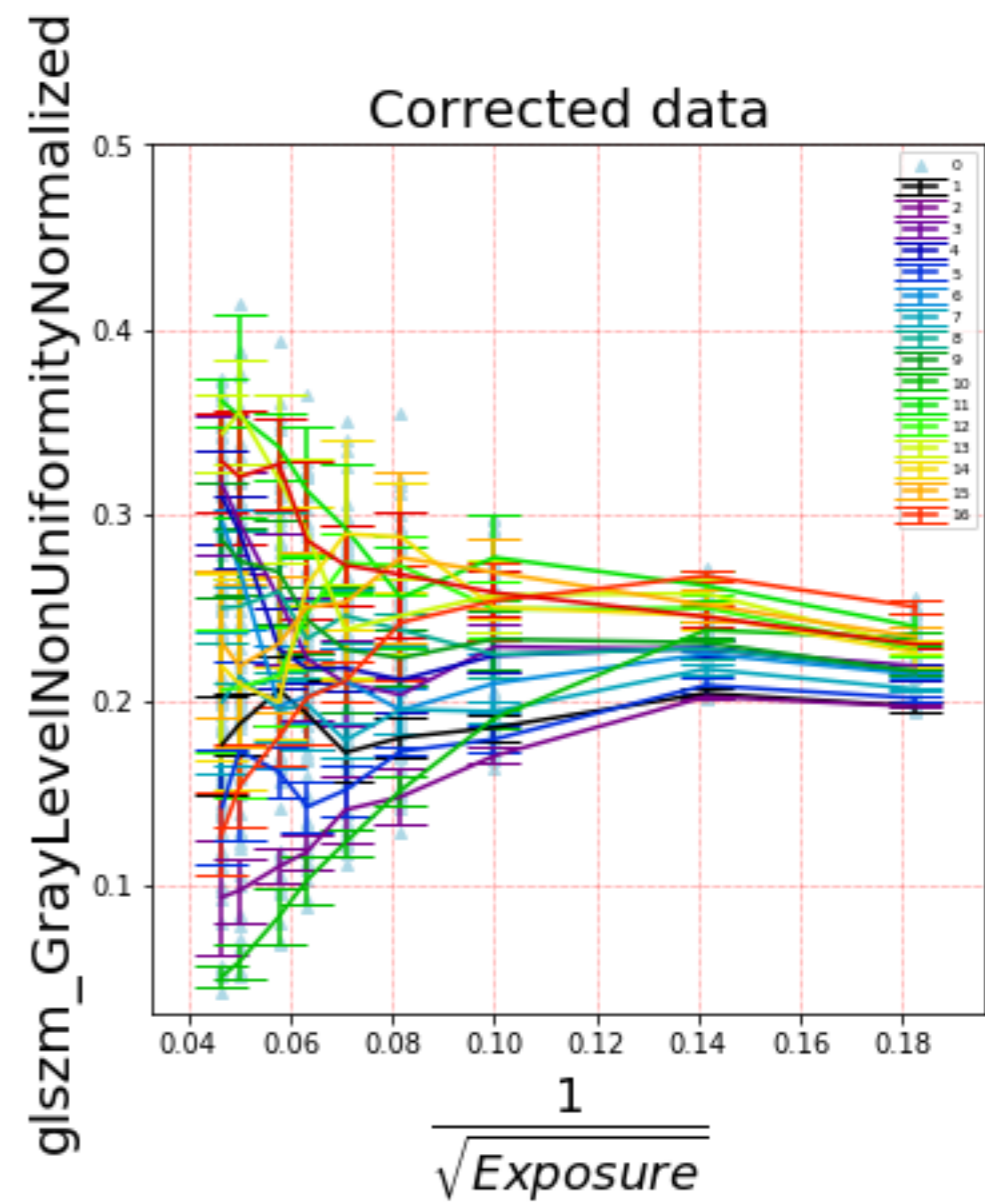

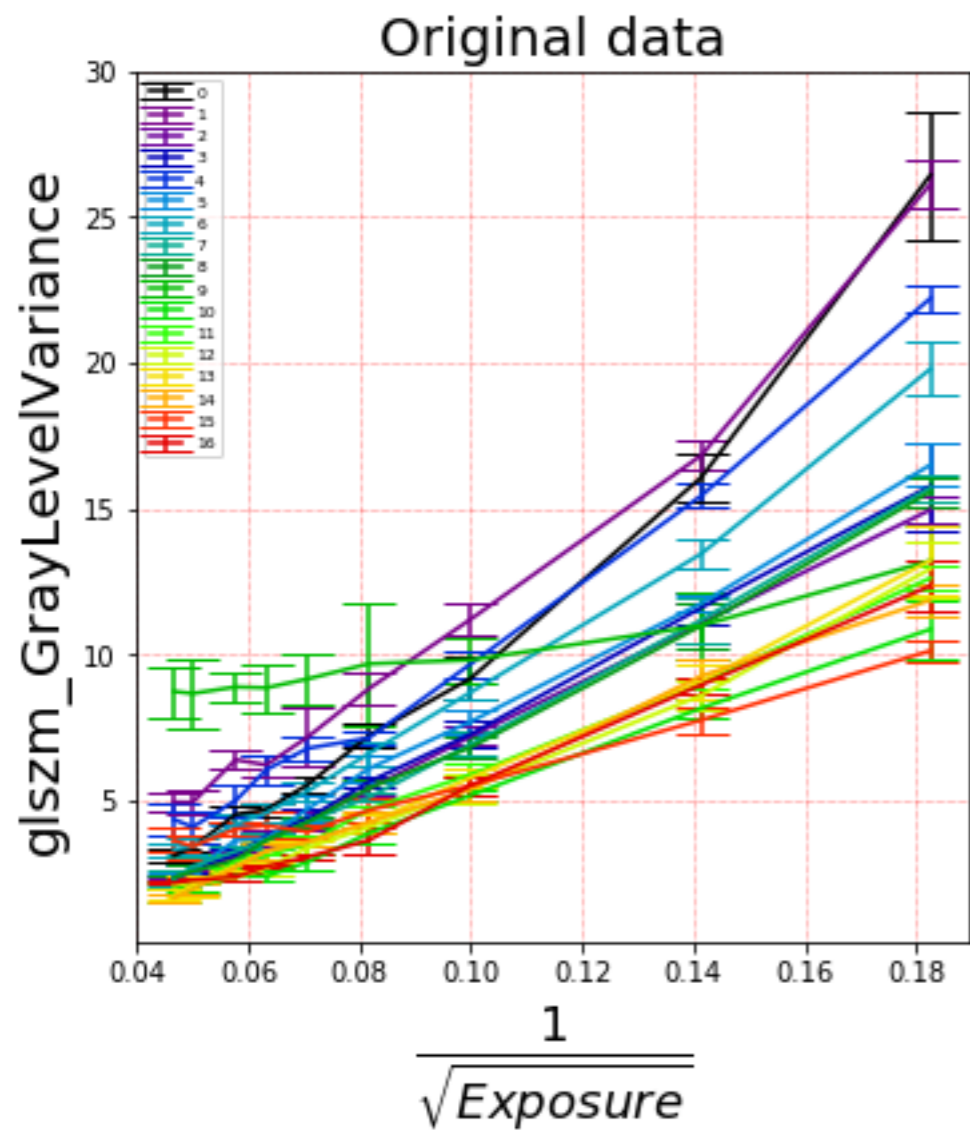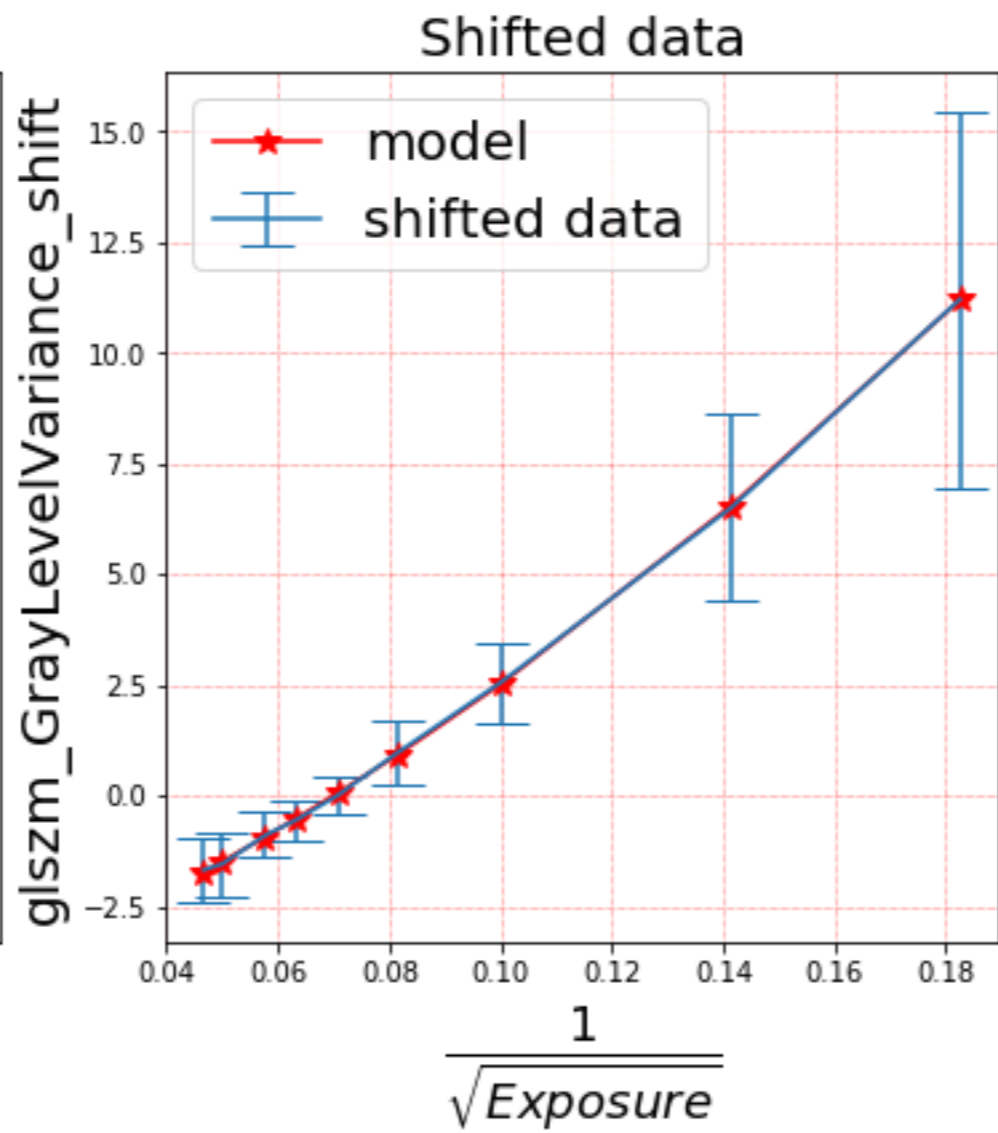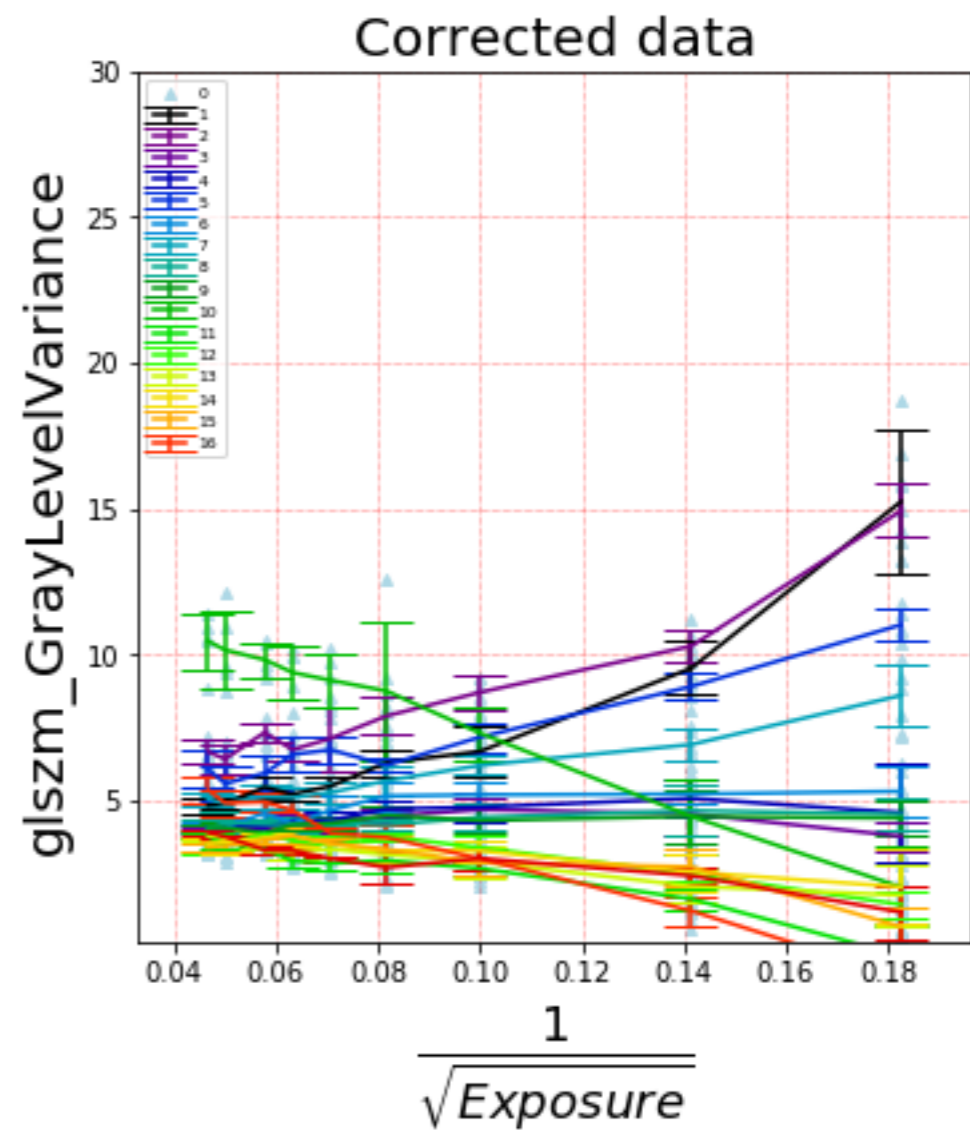



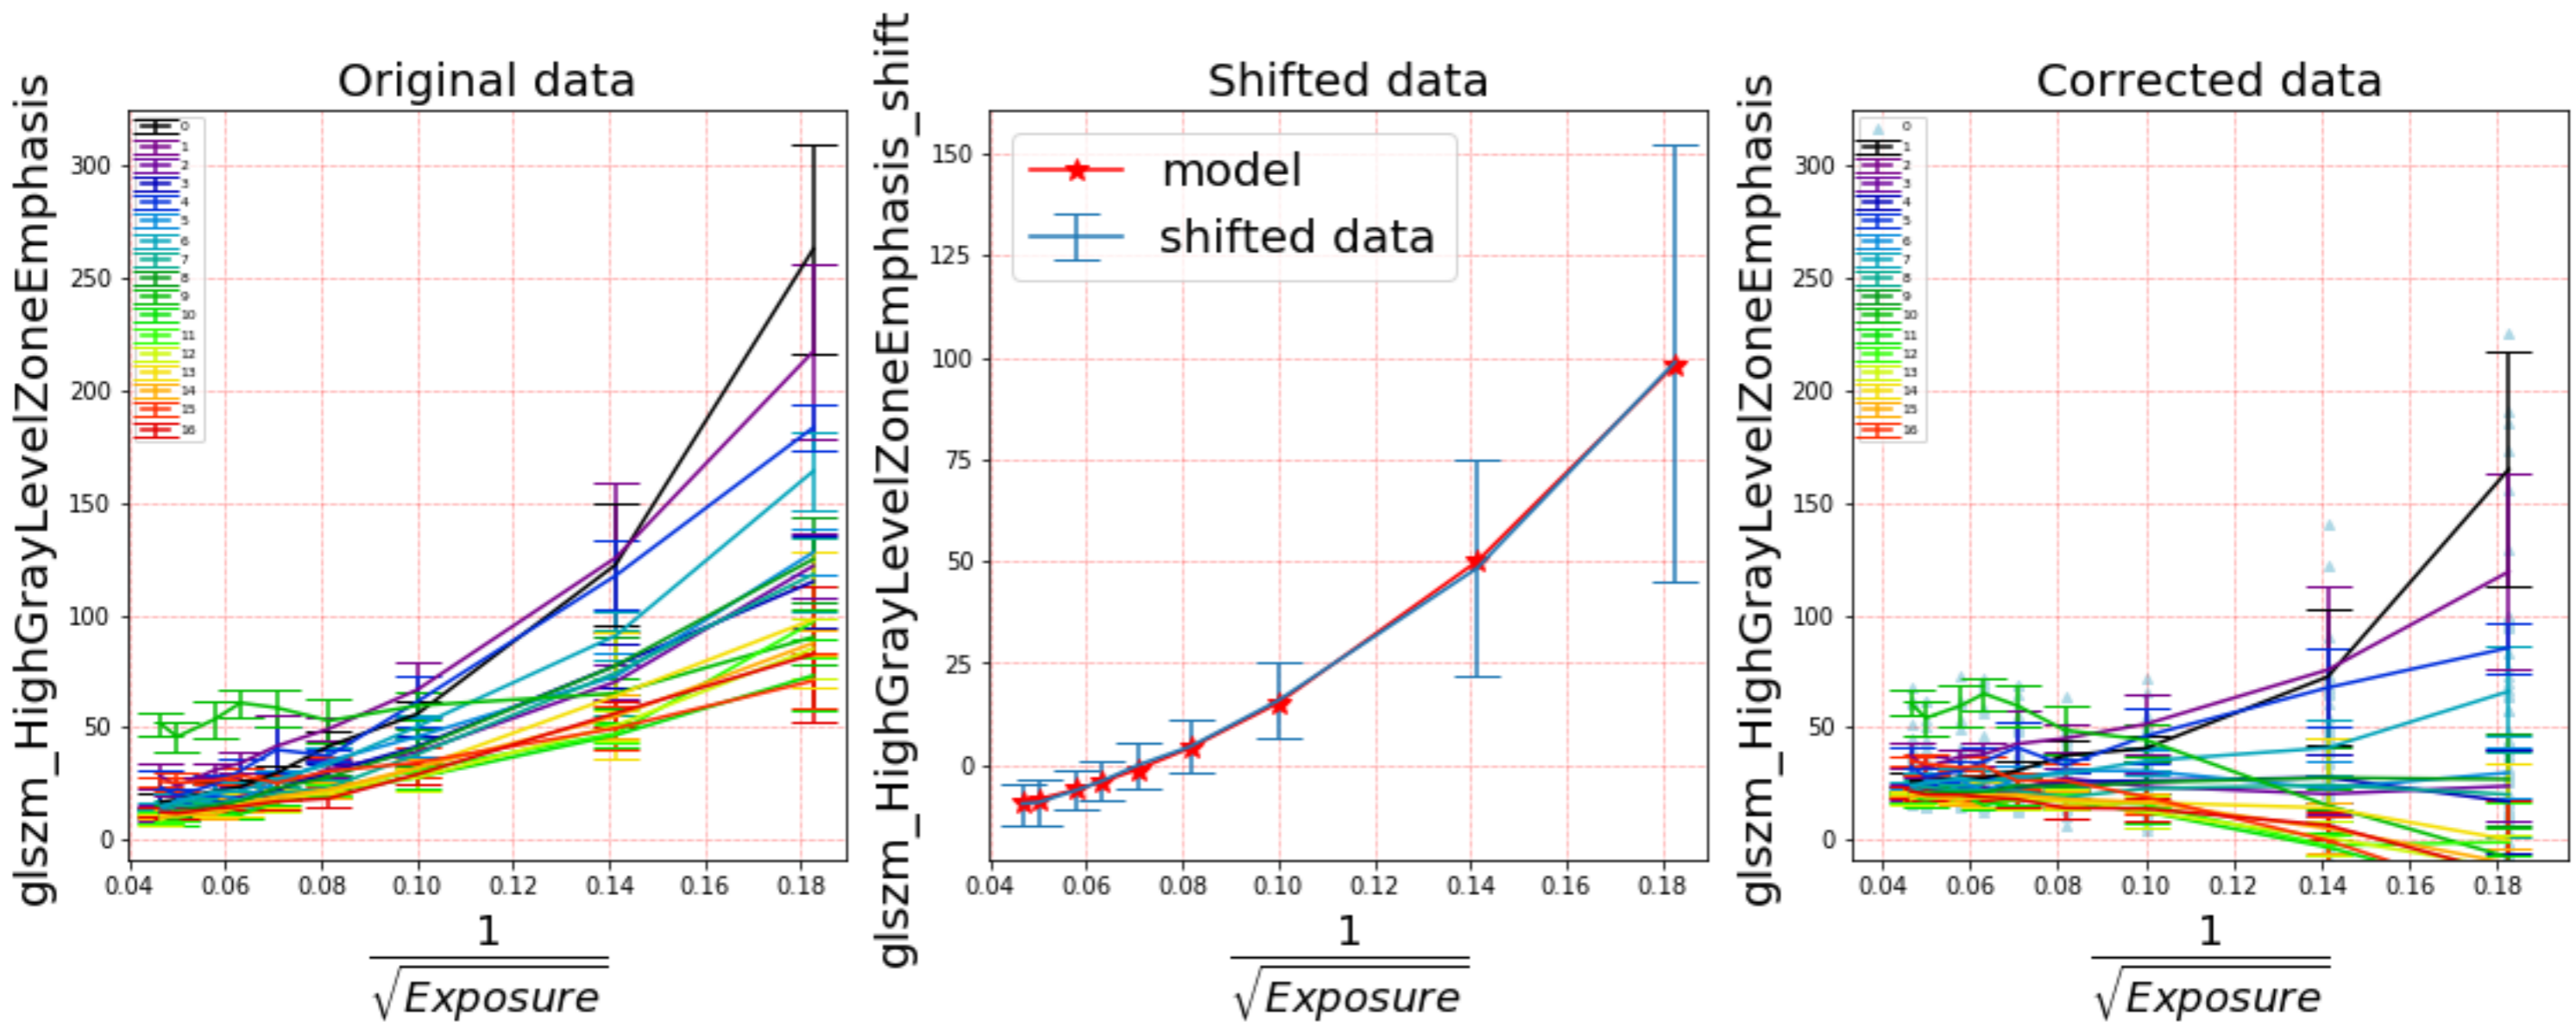



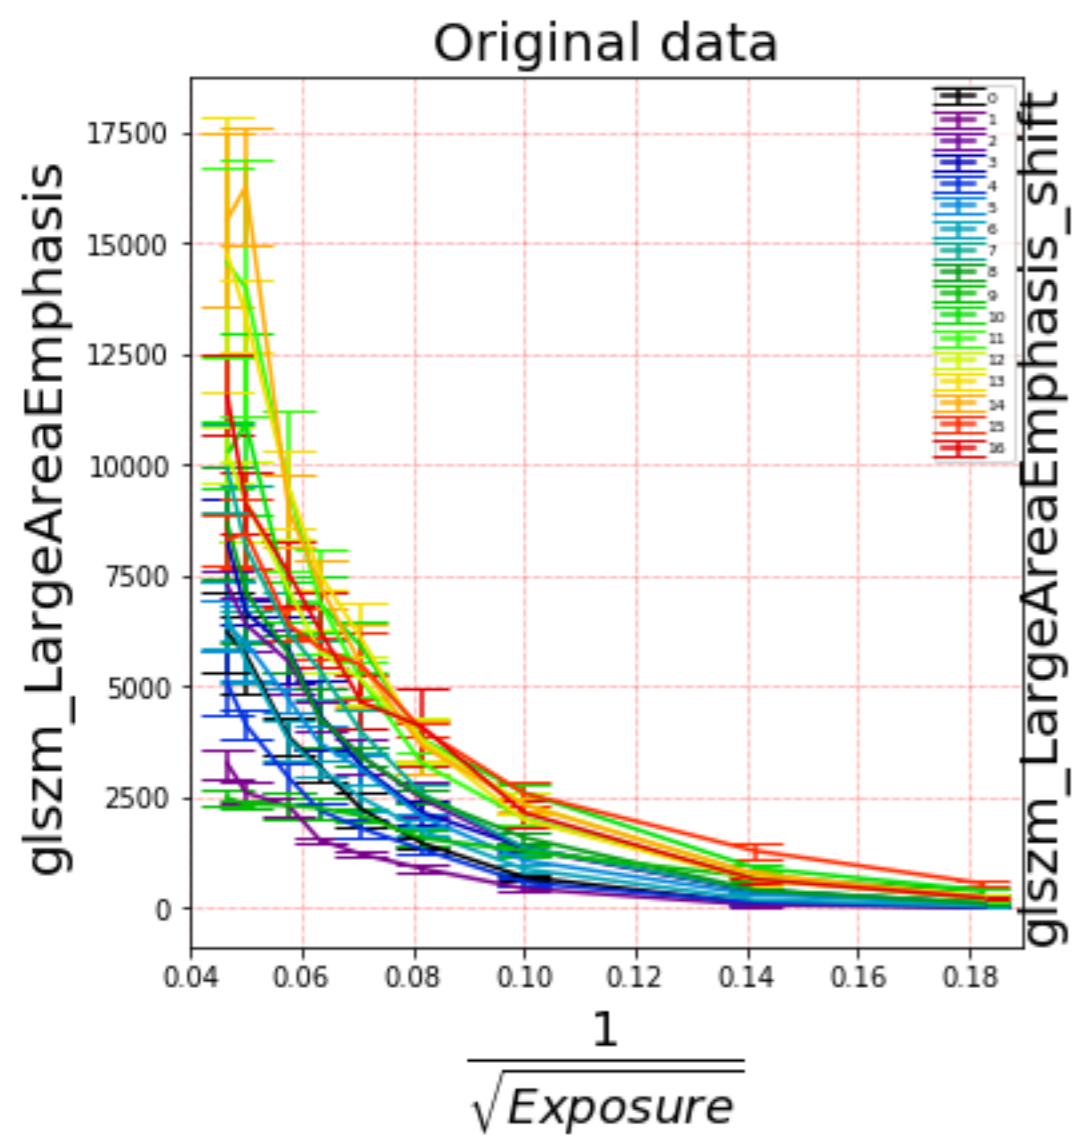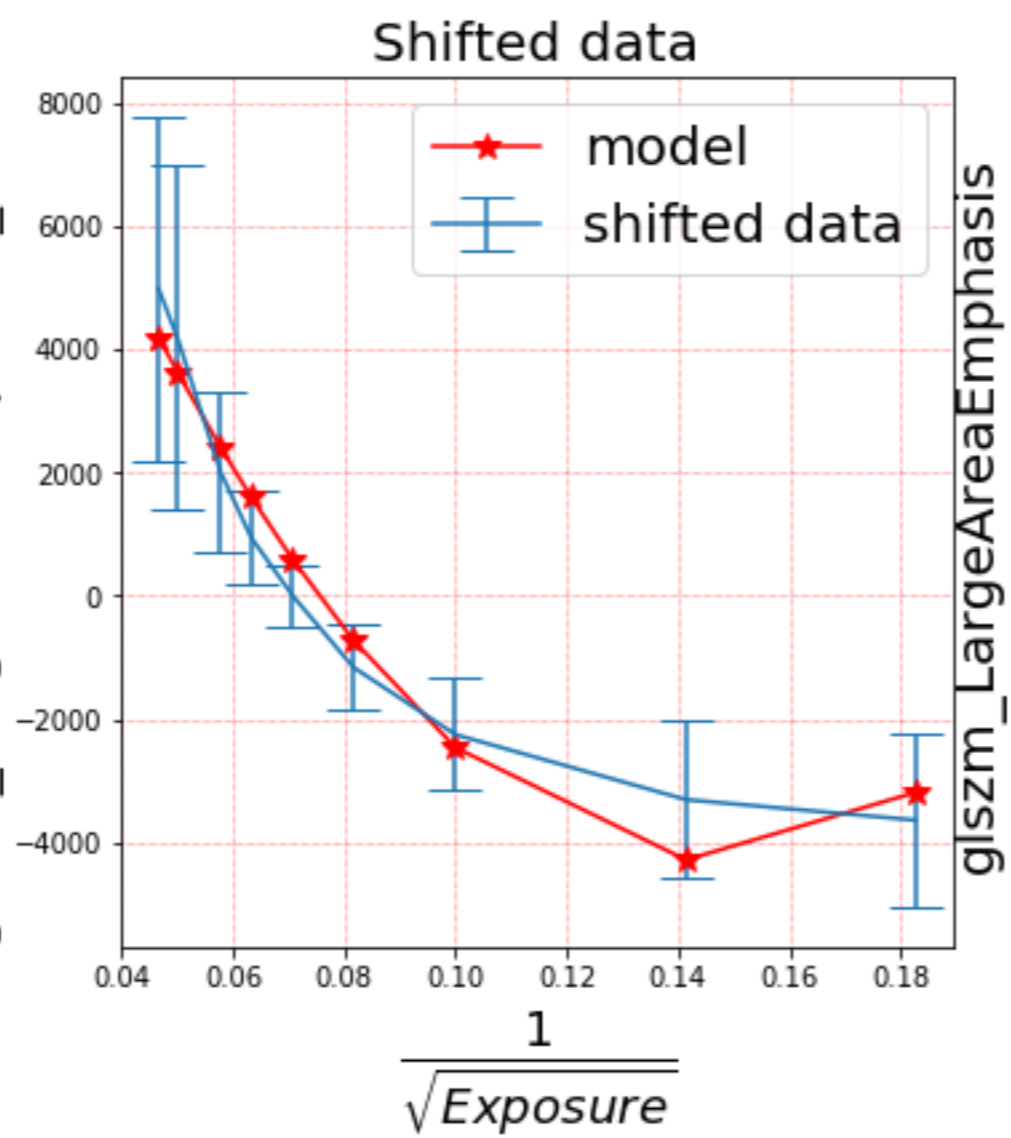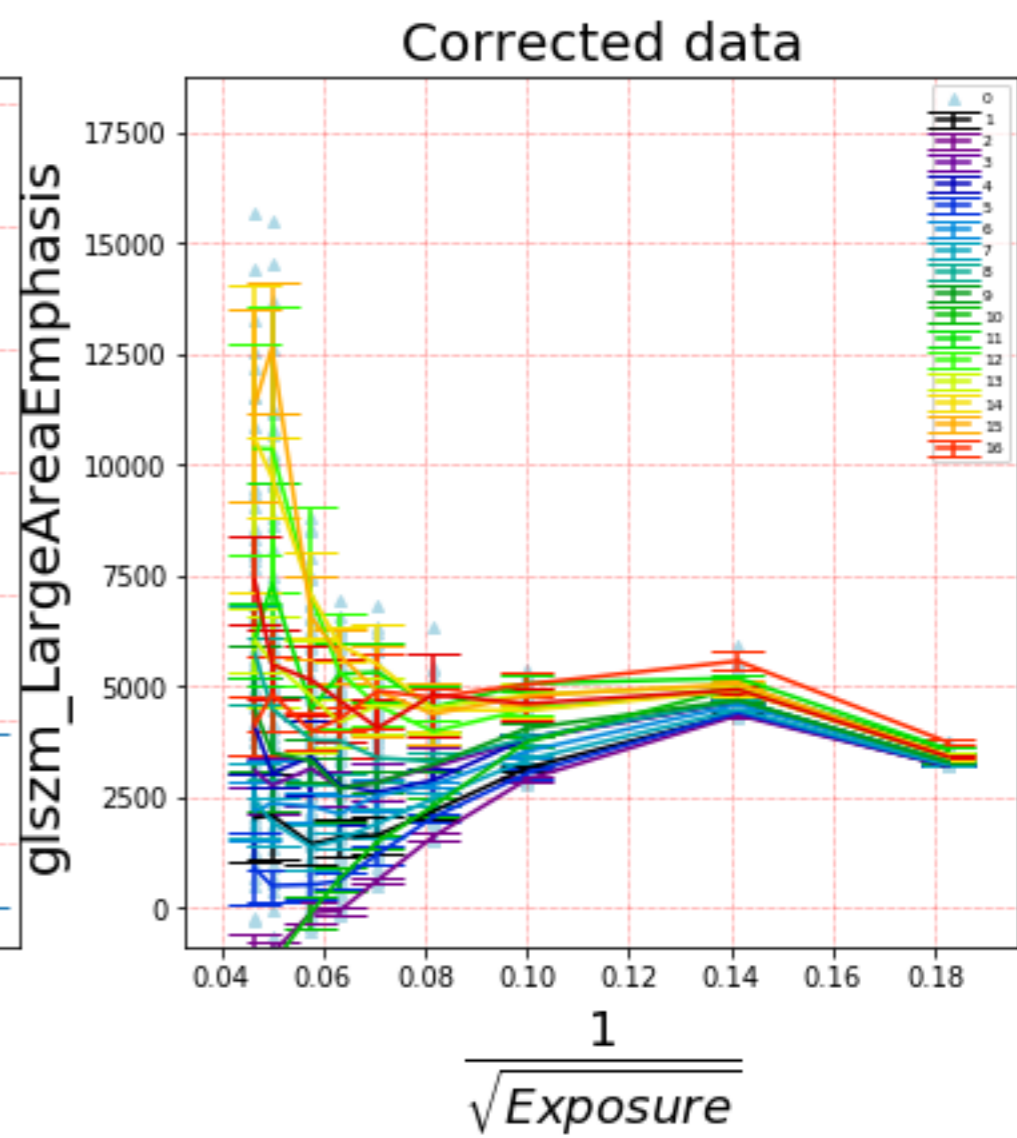

glszm\_LargeAreaHighGrayLevelEmphasis

Original data

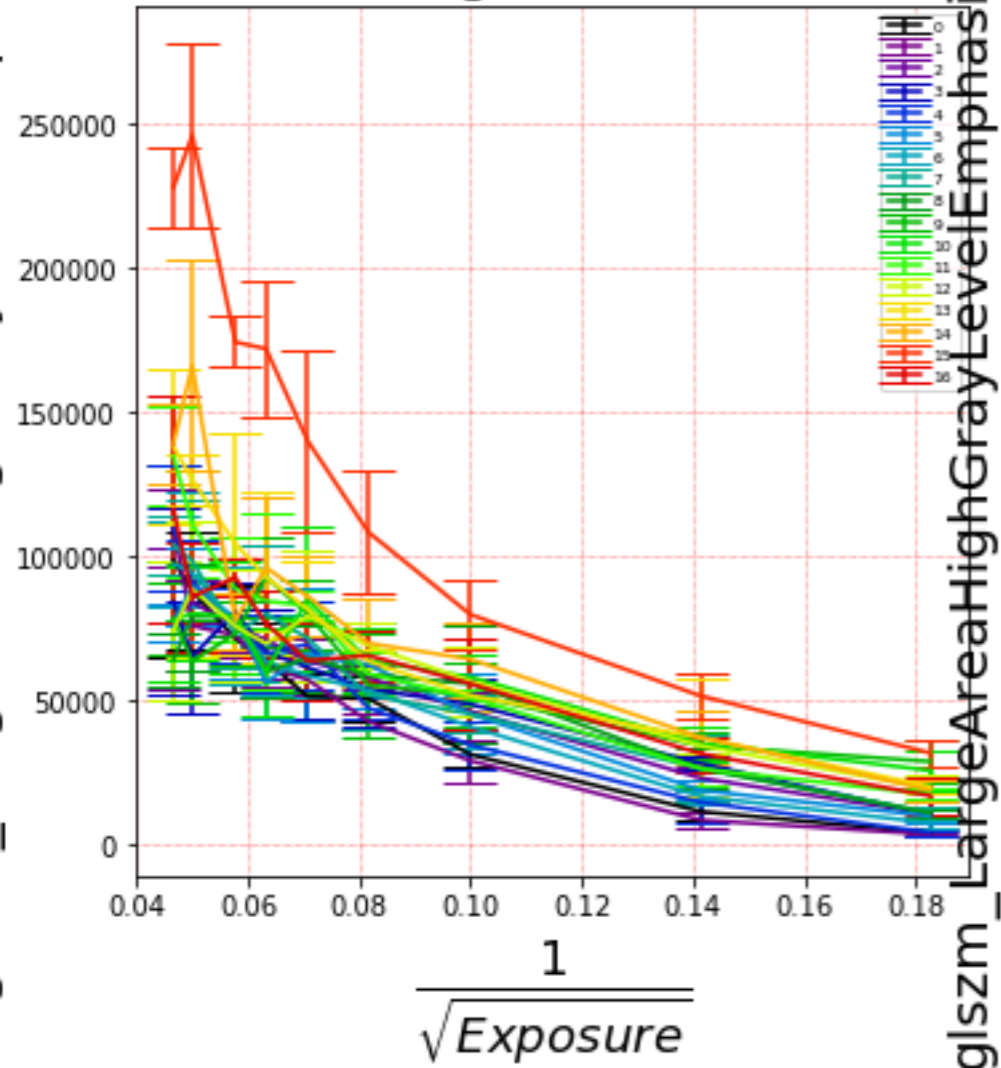

glszm\_LargeAreaHighGrayLevelEmphasis\_shift

Shifted data

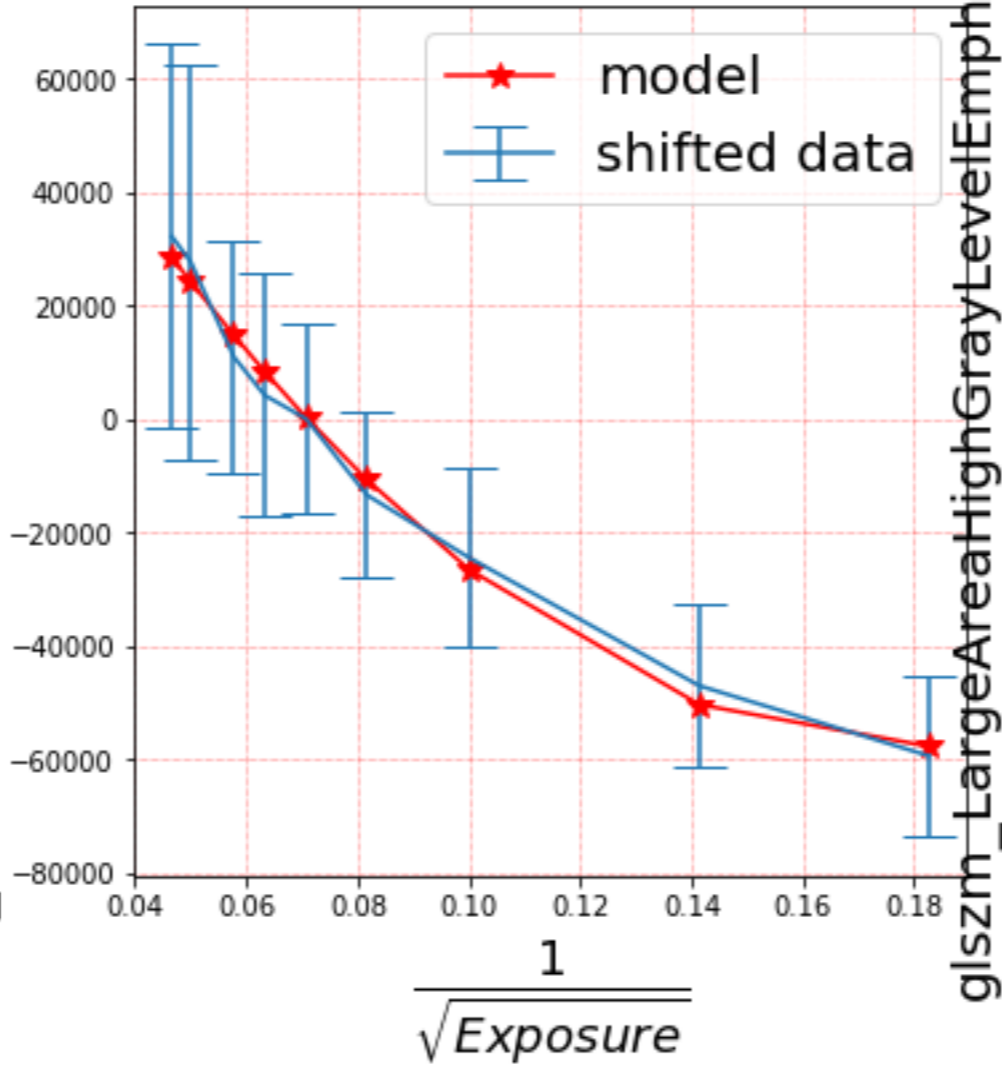

glszm\_LargeAreaHighGrayLevelEmphasis

Corrected data

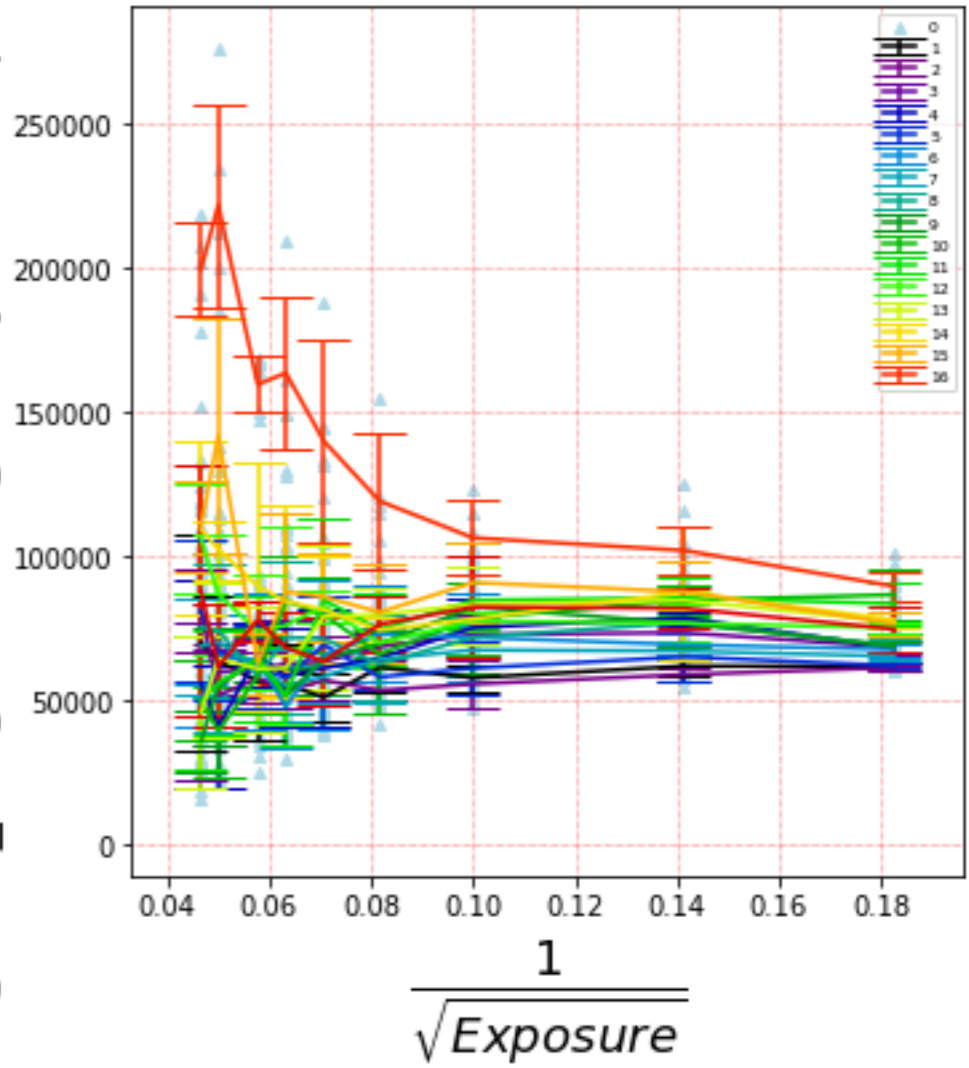

glszm\_LargeAreaLowGrayLevelEmphasis

Original data

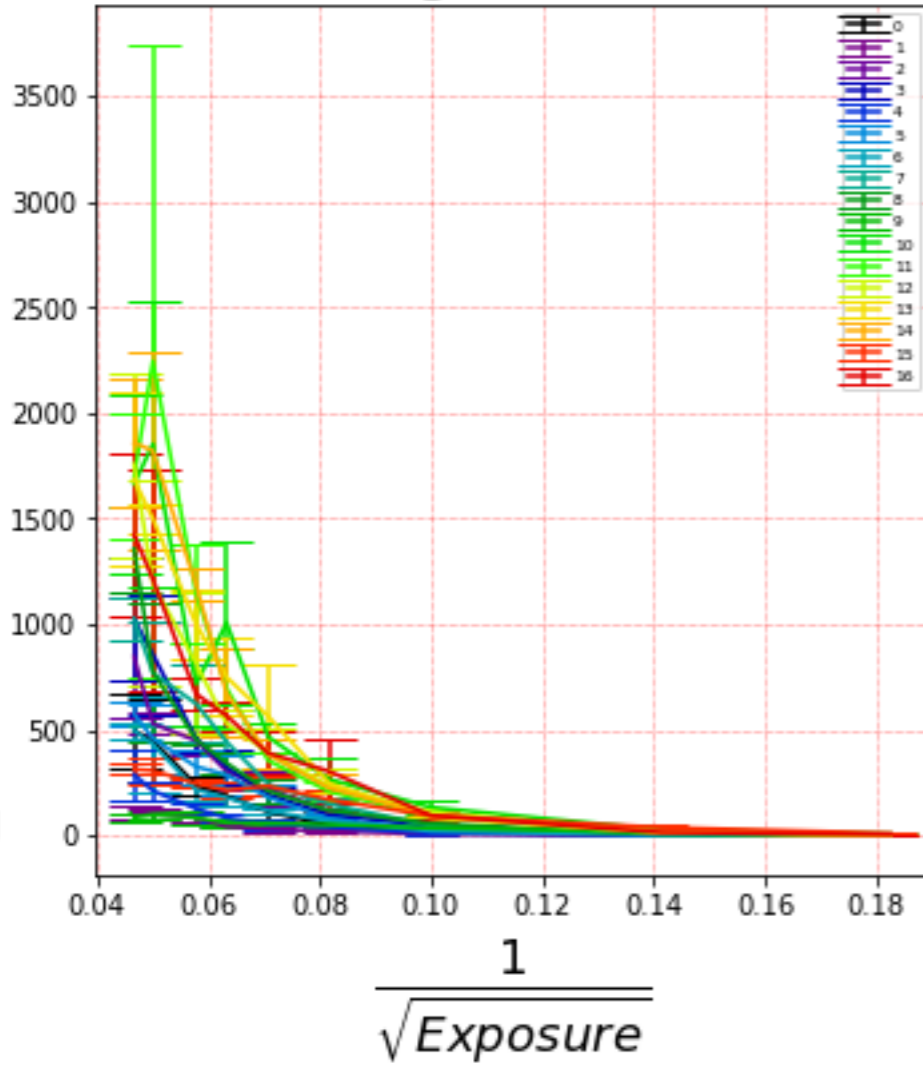

glszm\_LargeAreaLowGrayLevelEmphasis\_shift

Shifted data

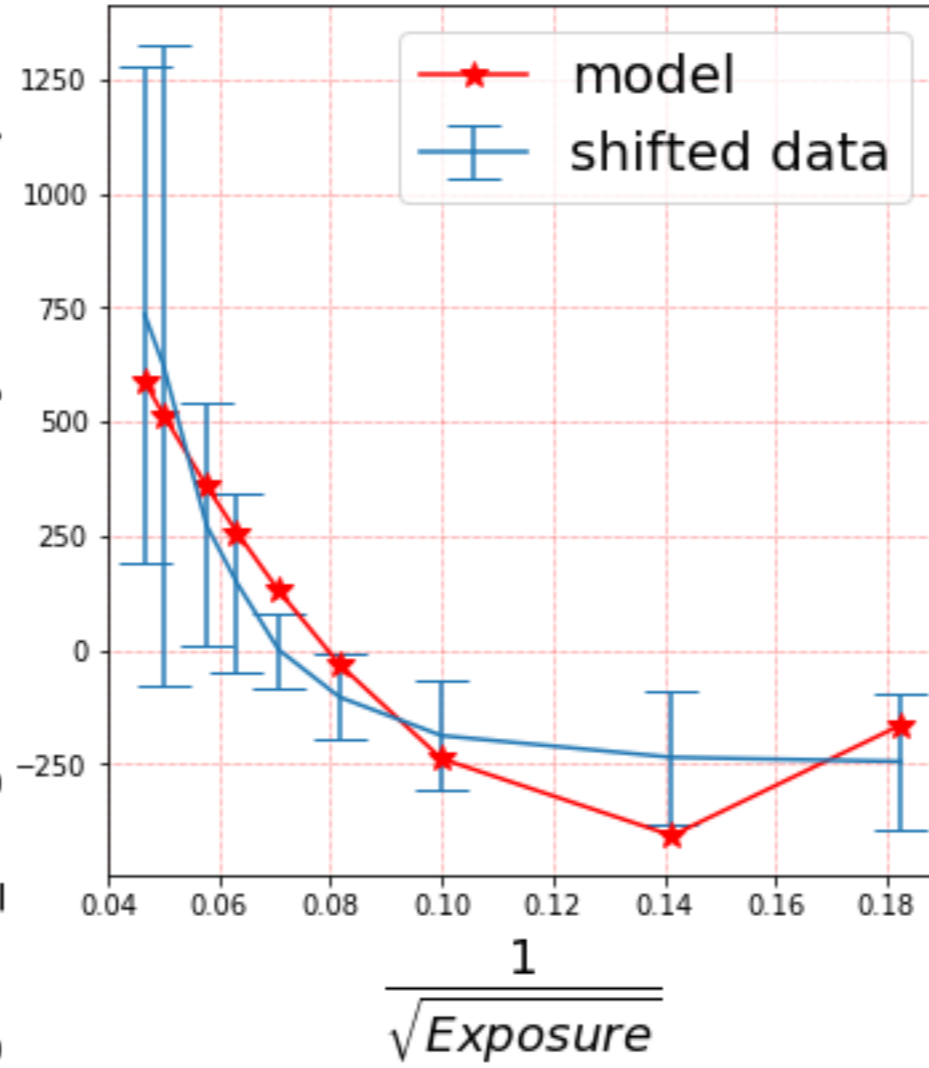

glszm\_LargeAreaLowGrayLevelEmphasis

Corrected data

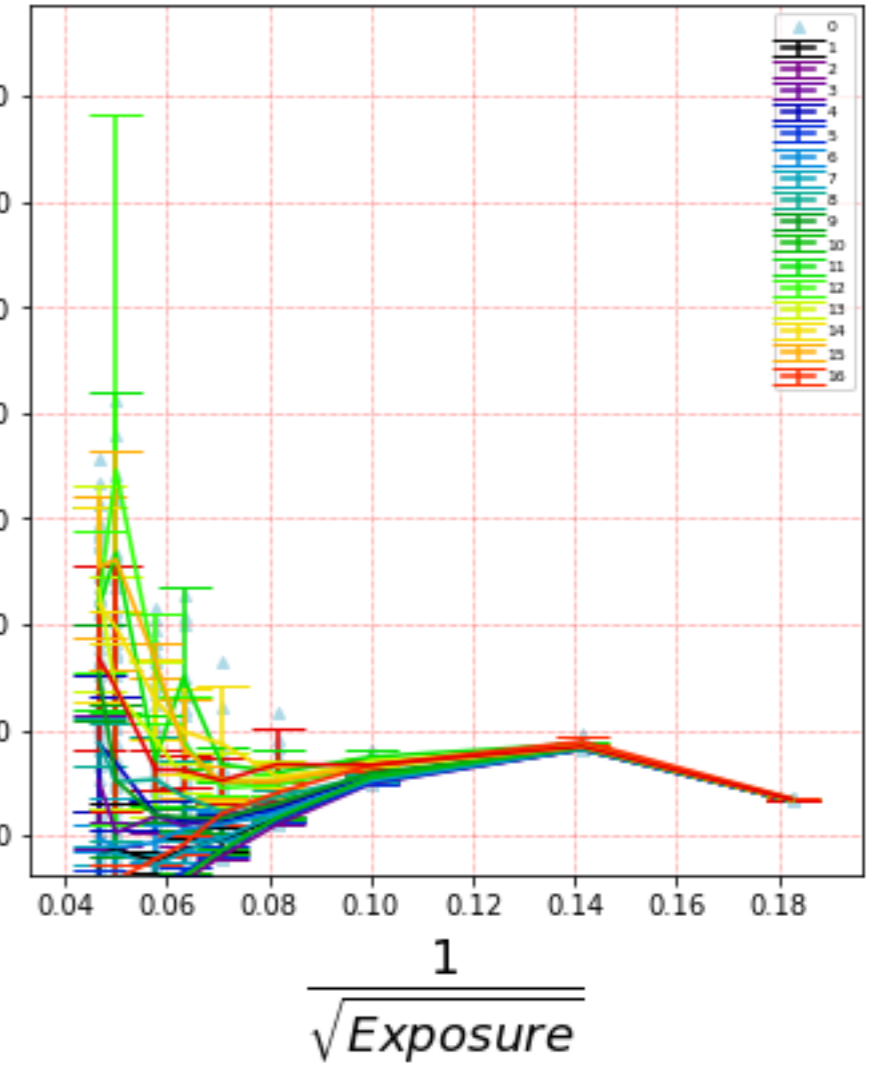

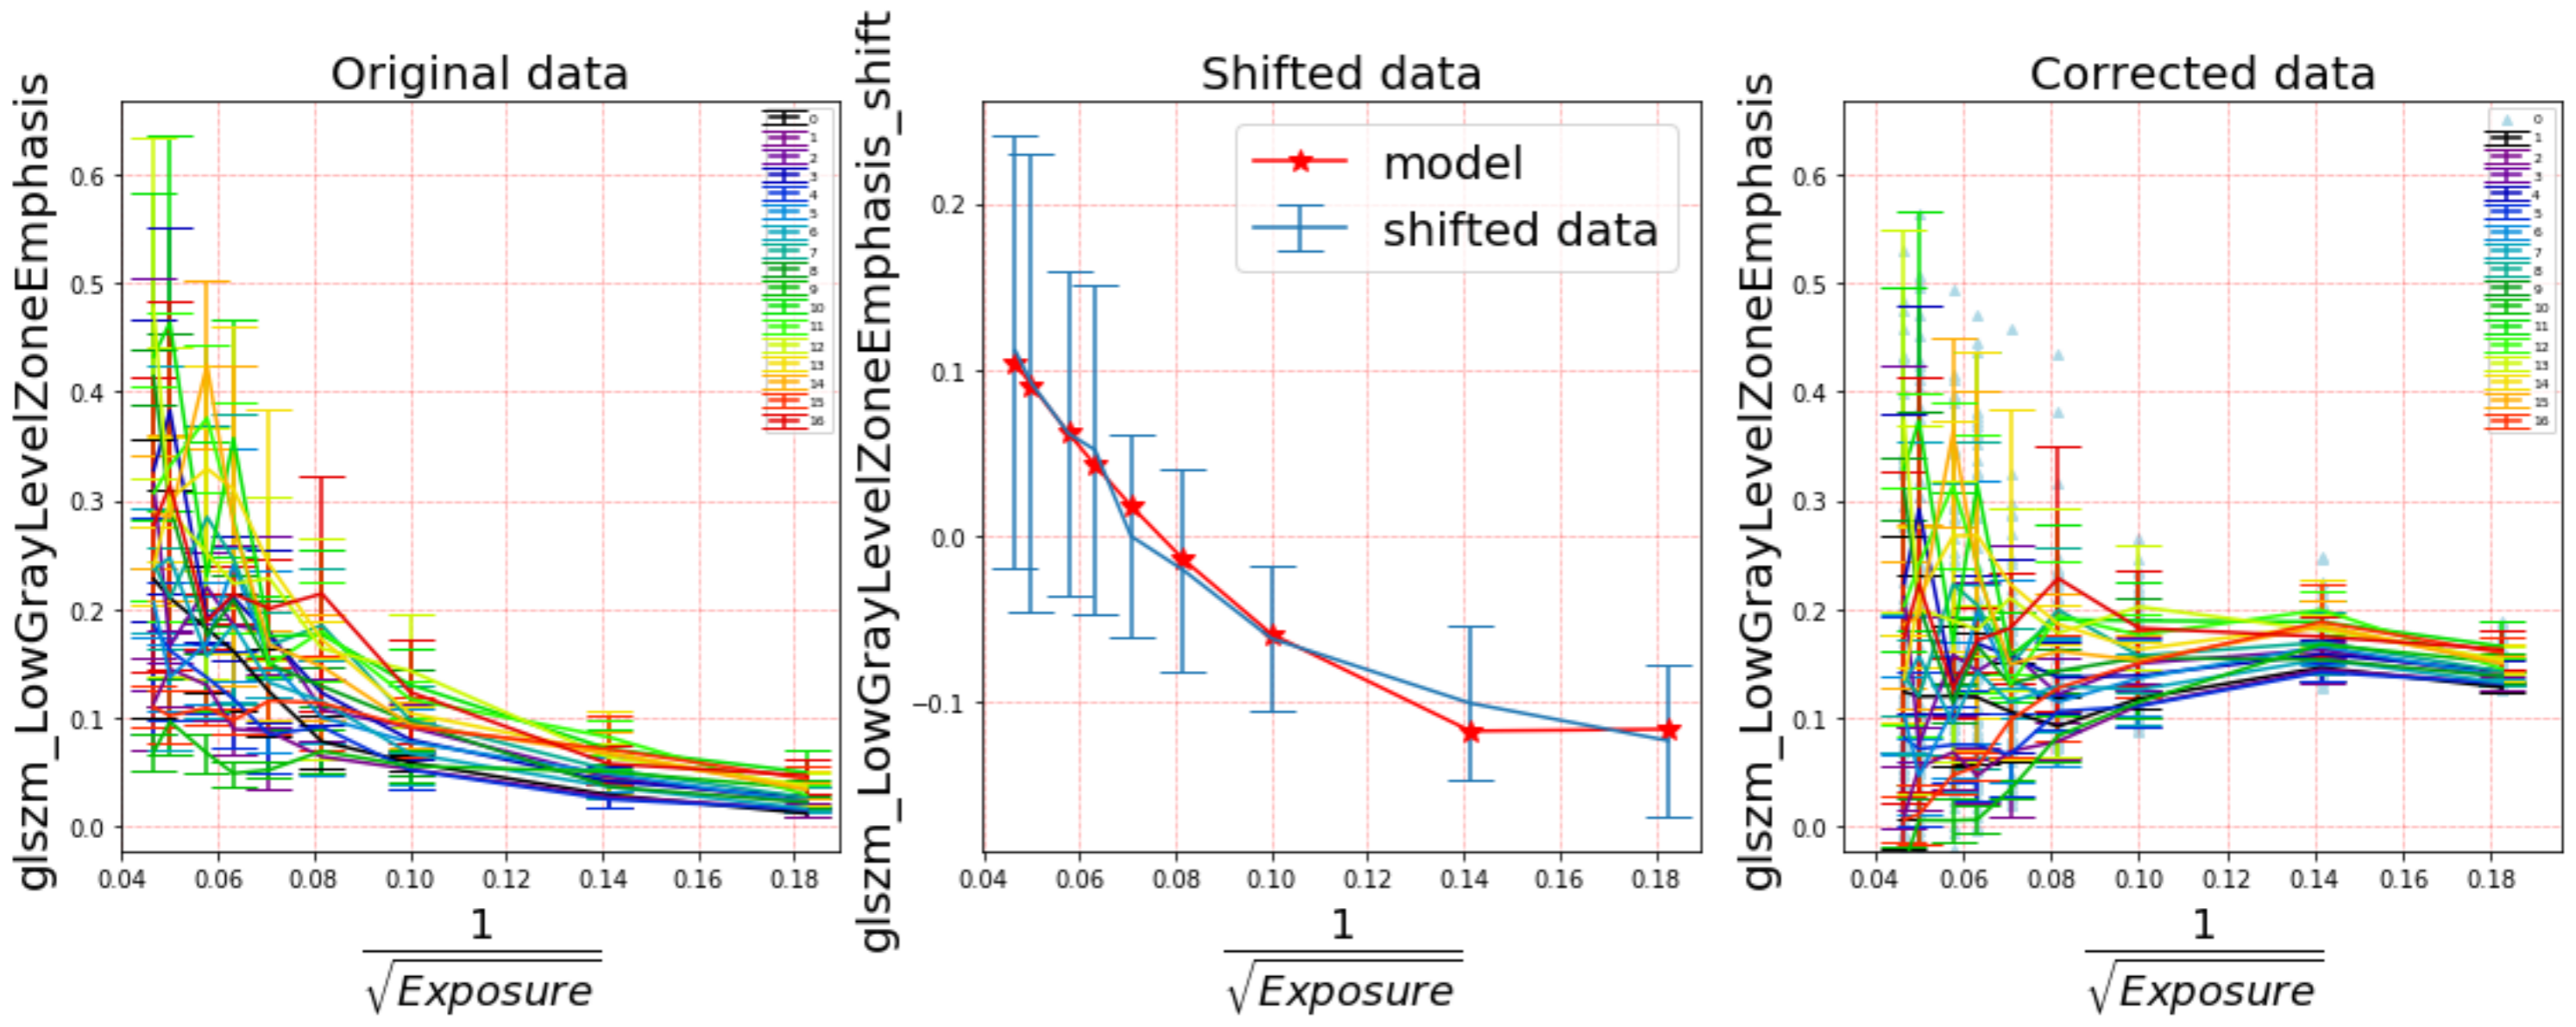



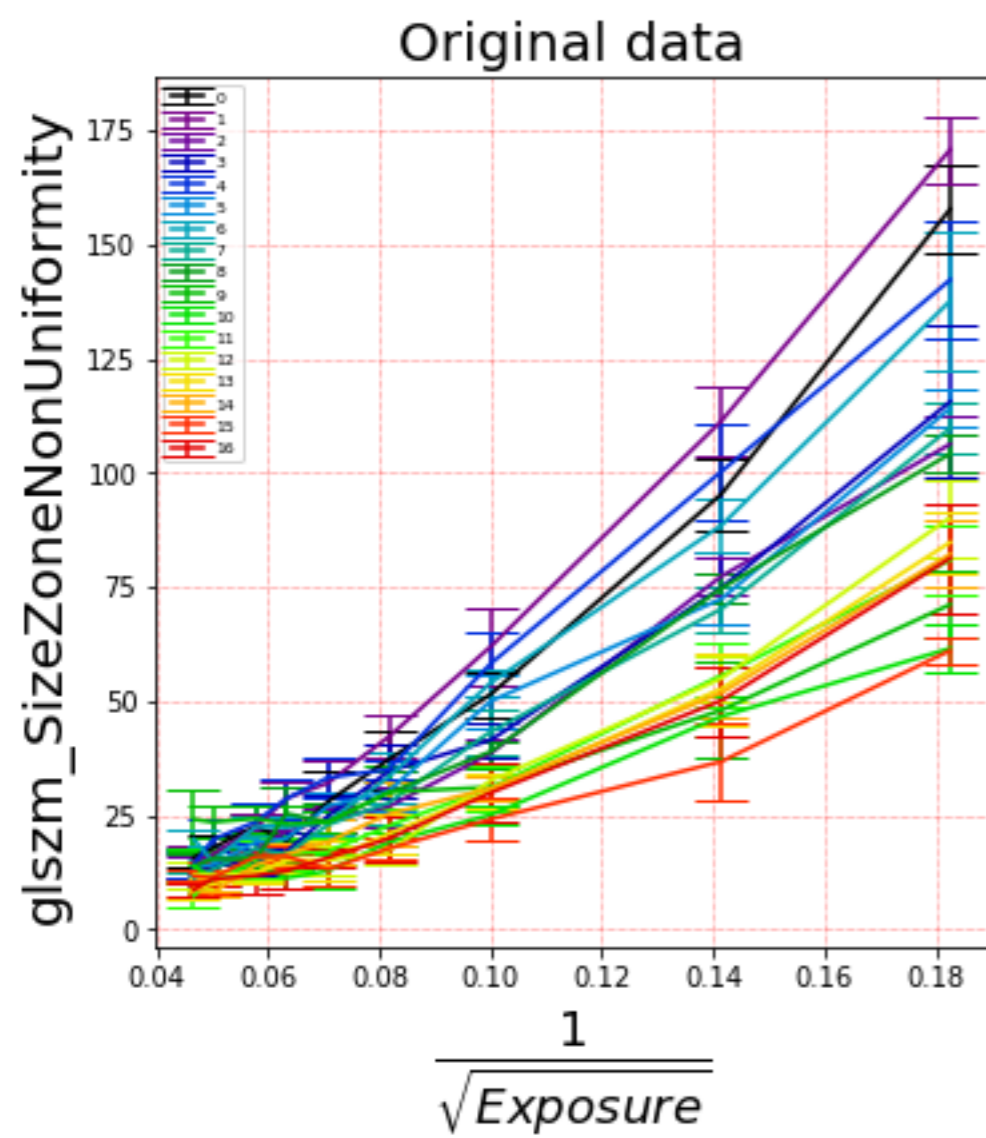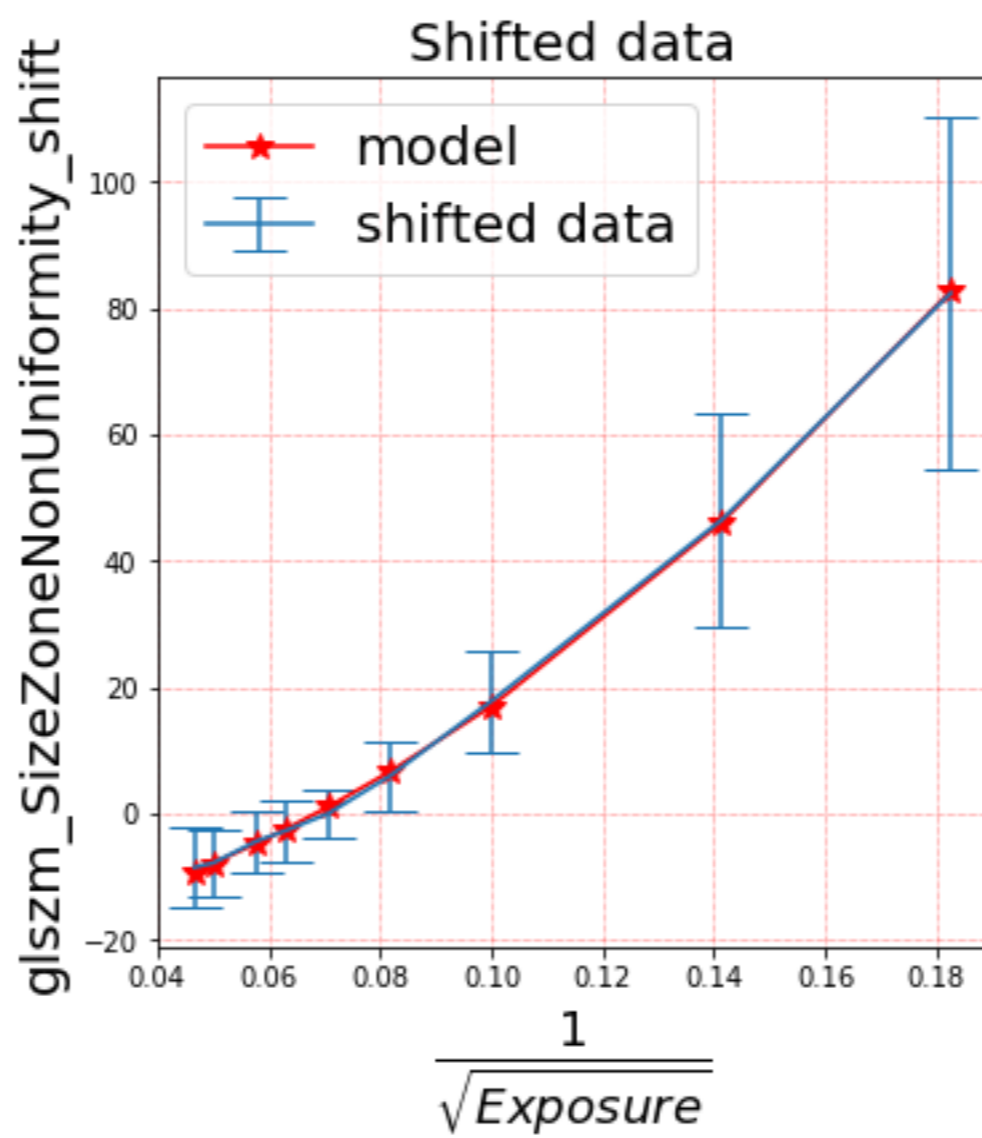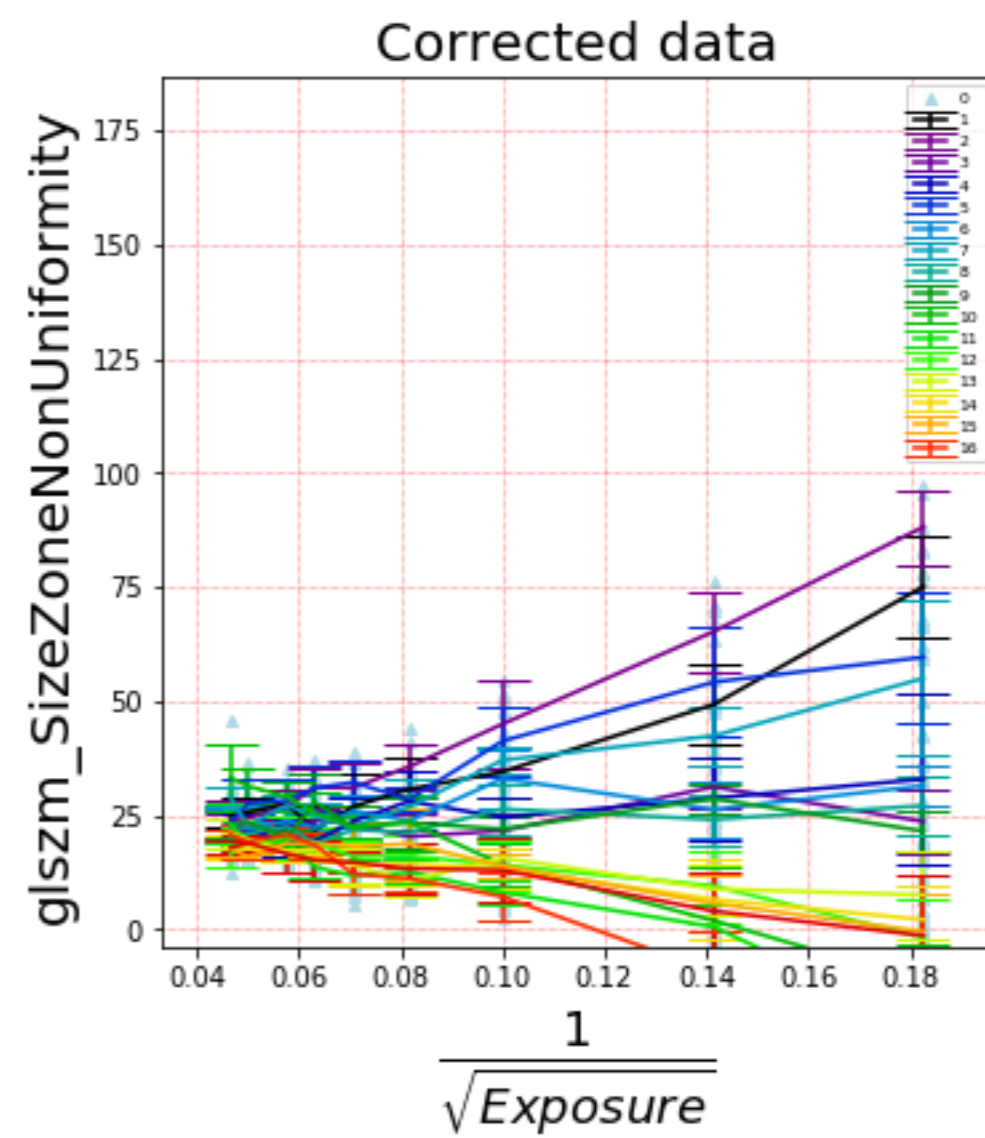

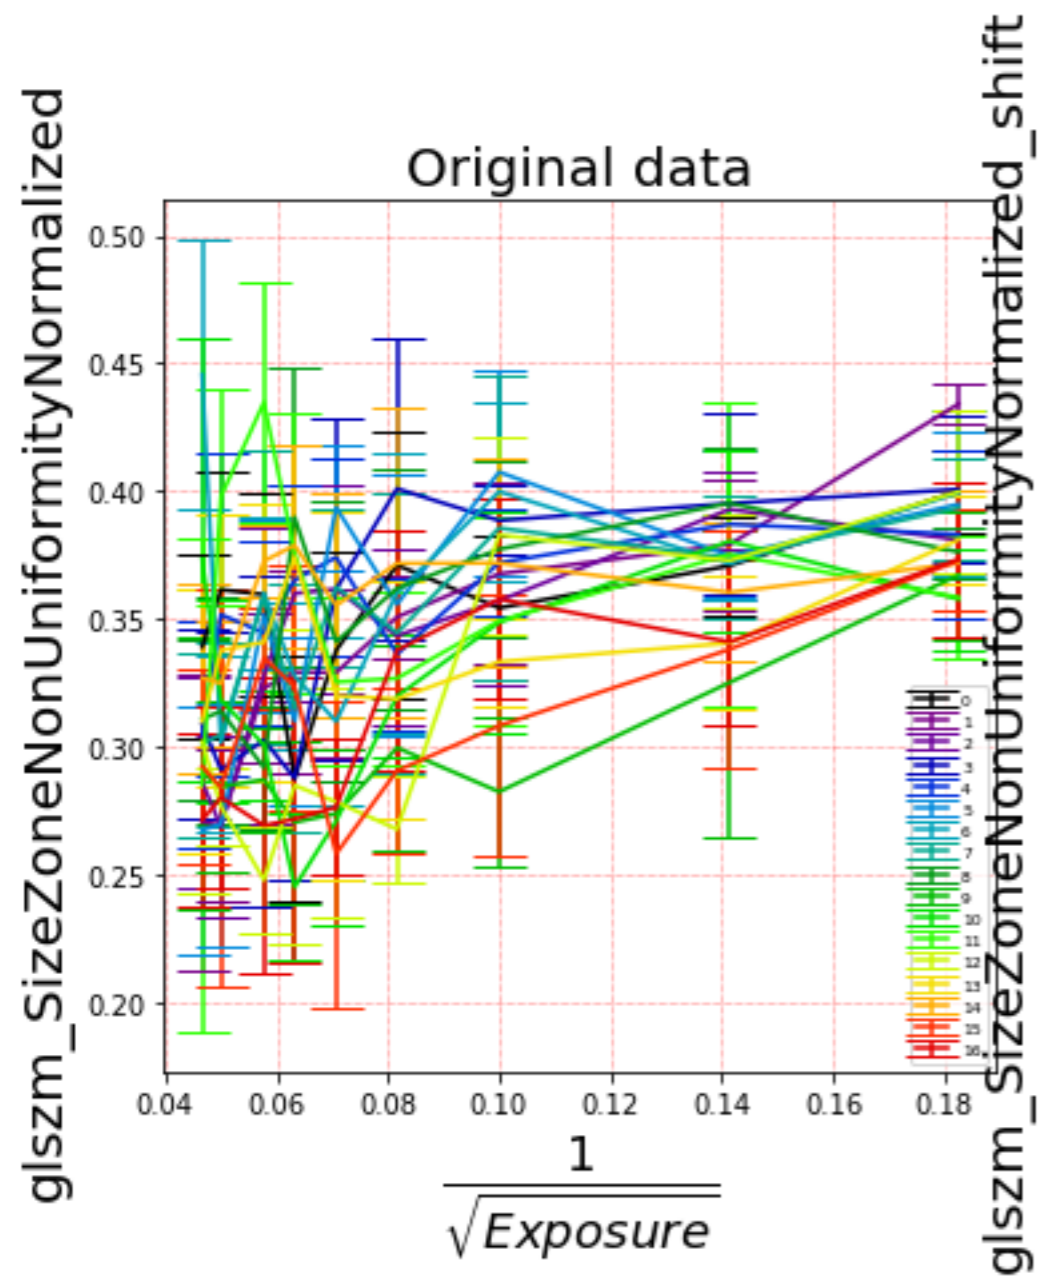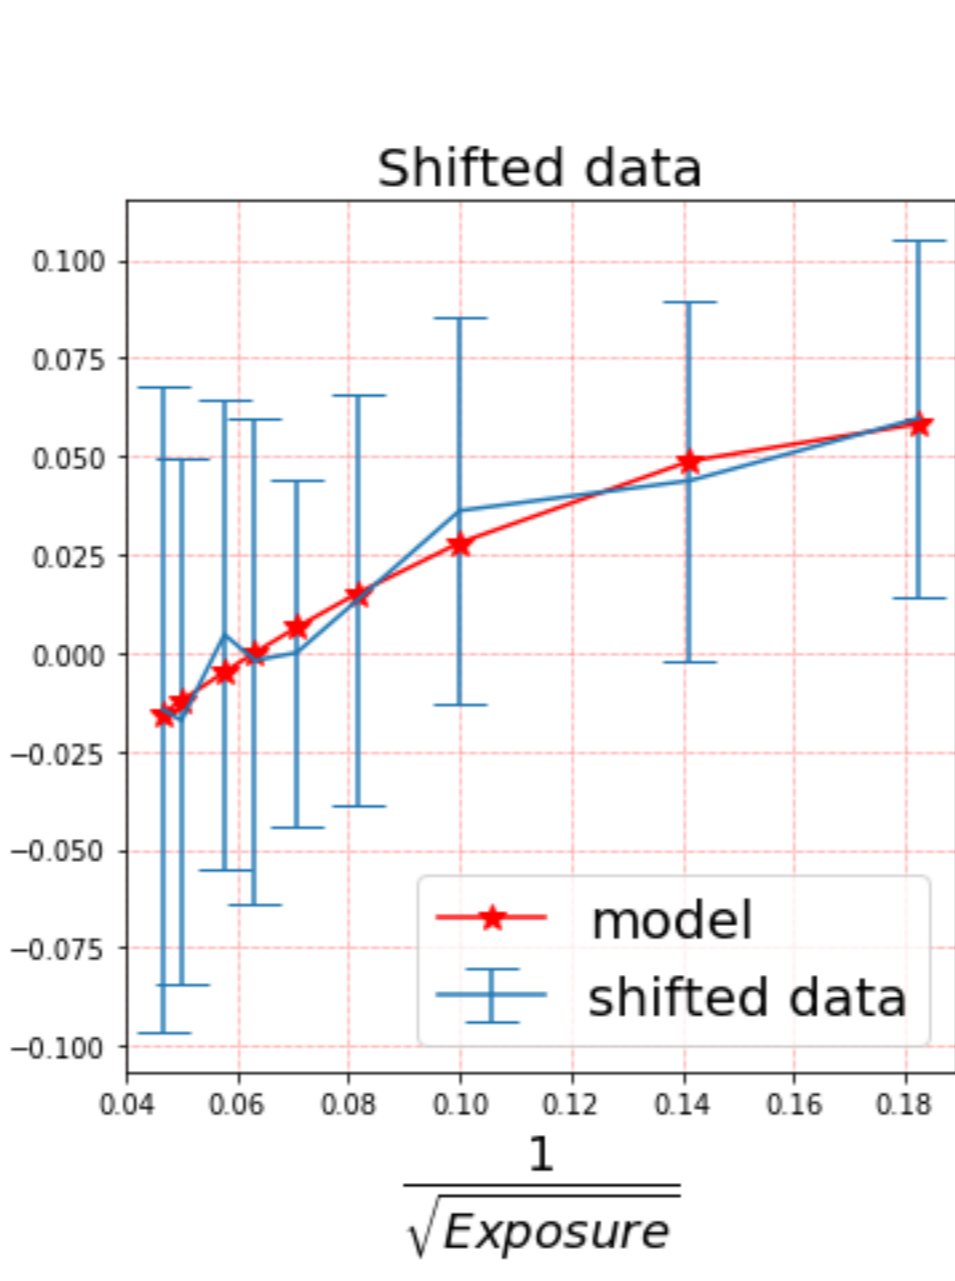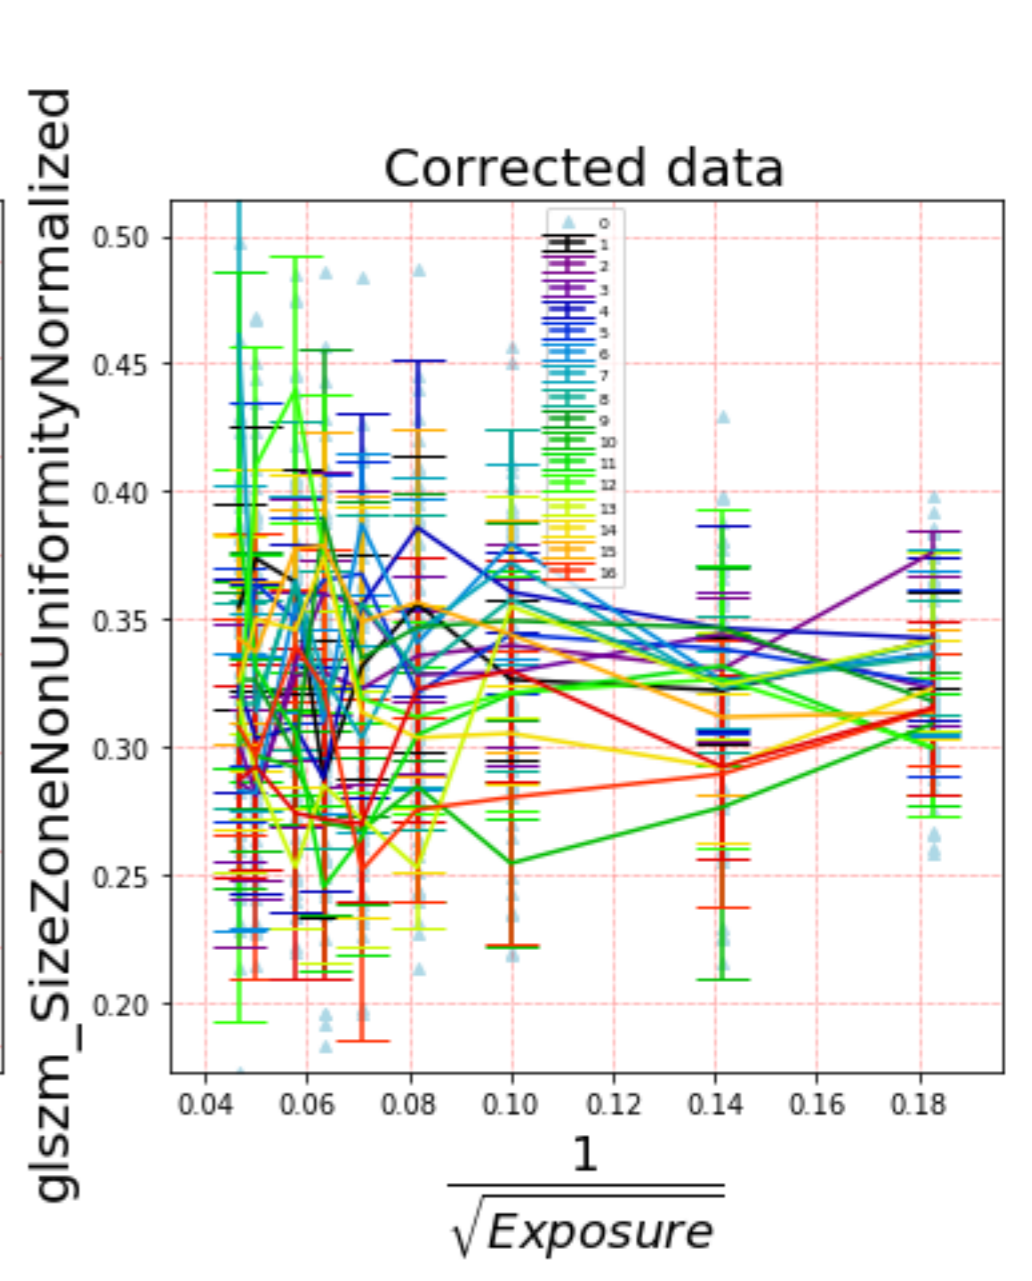

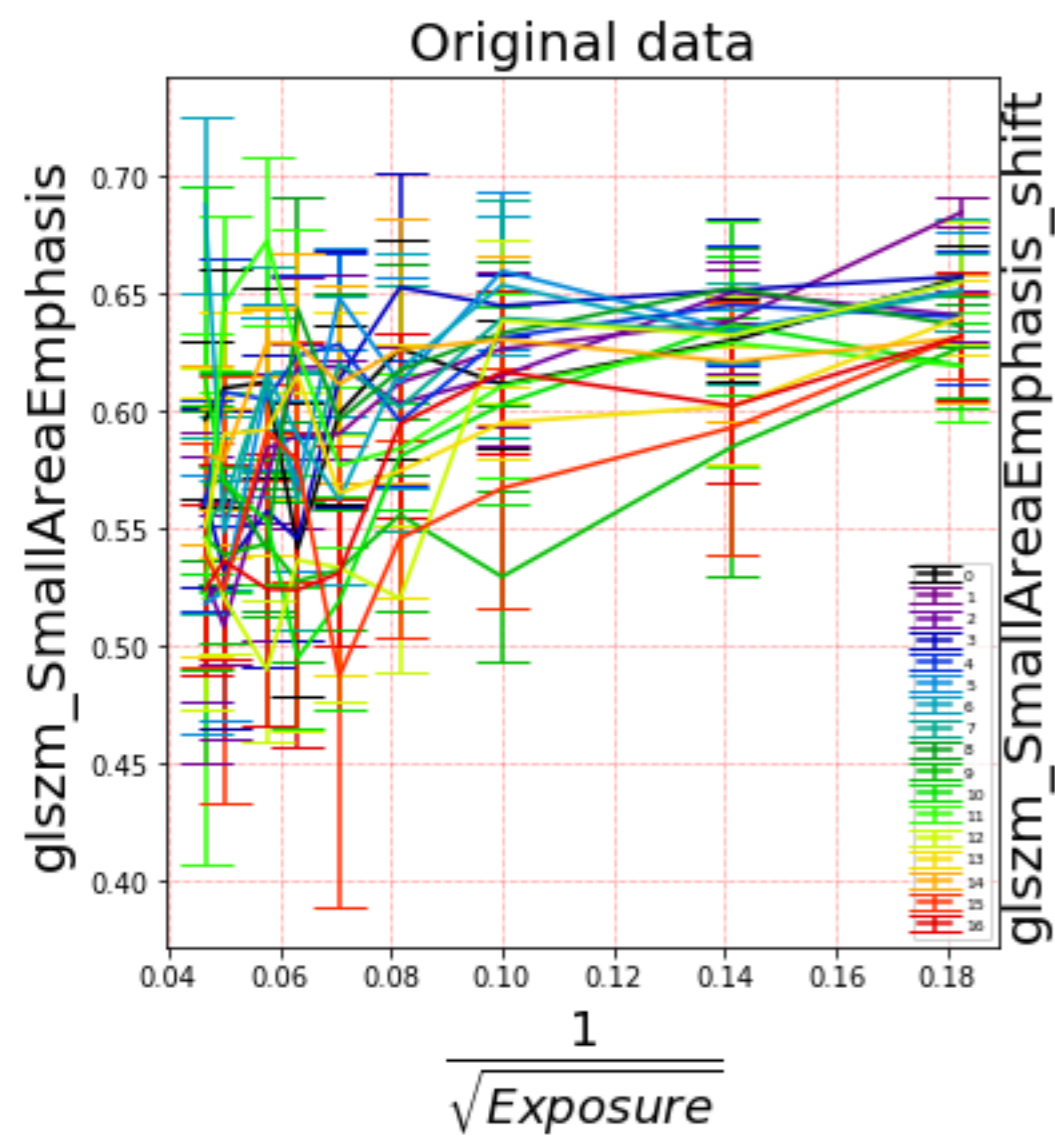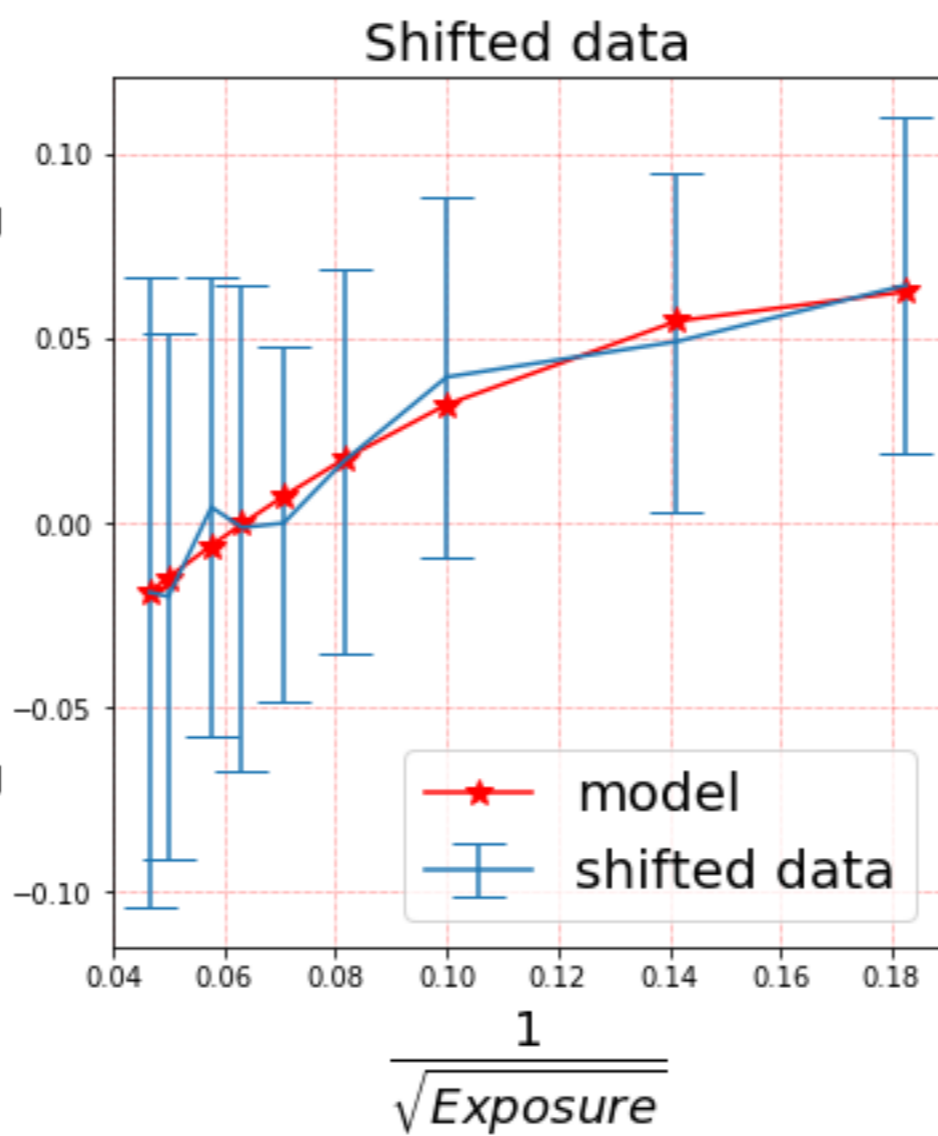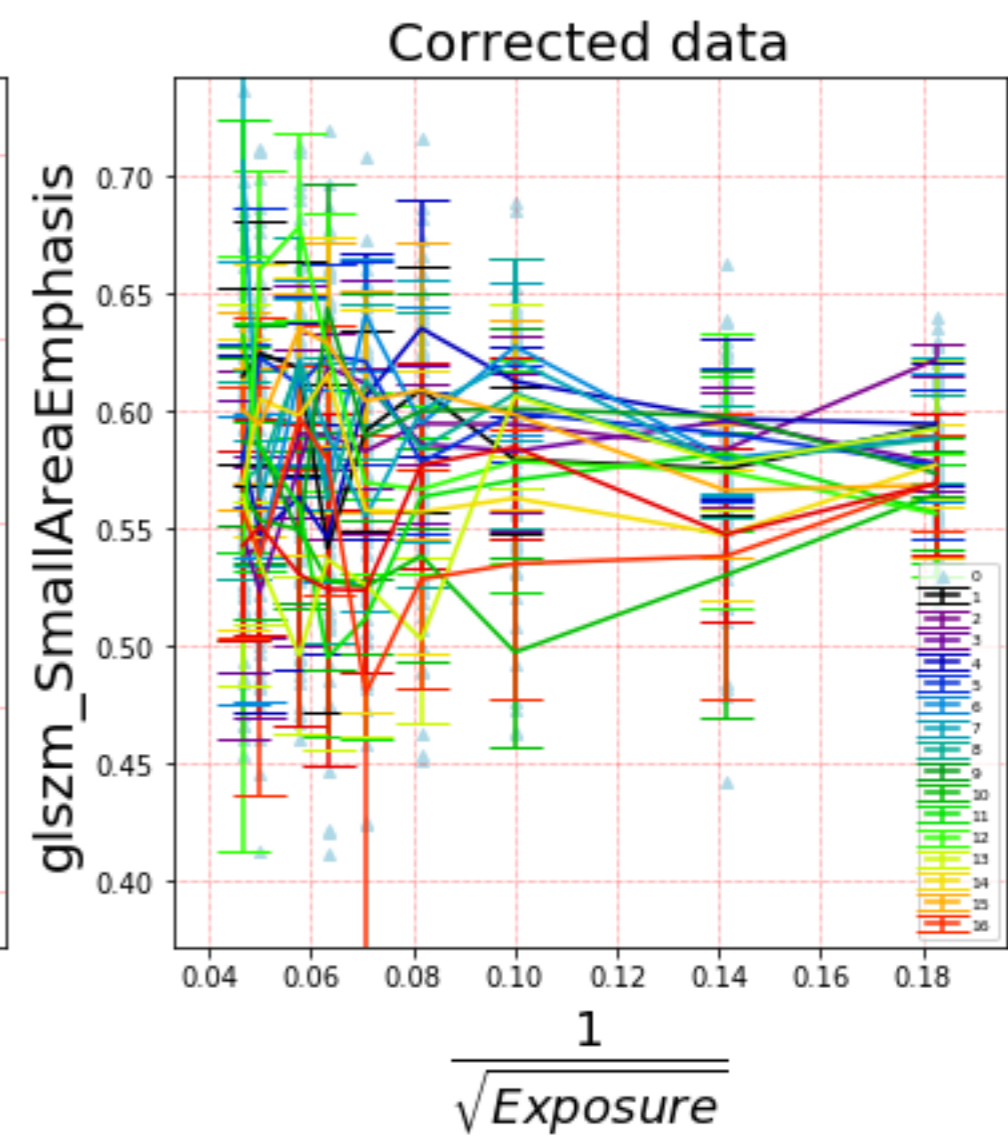



glszm\_SmallAreaHighGrayLevelEmphasis

Original data

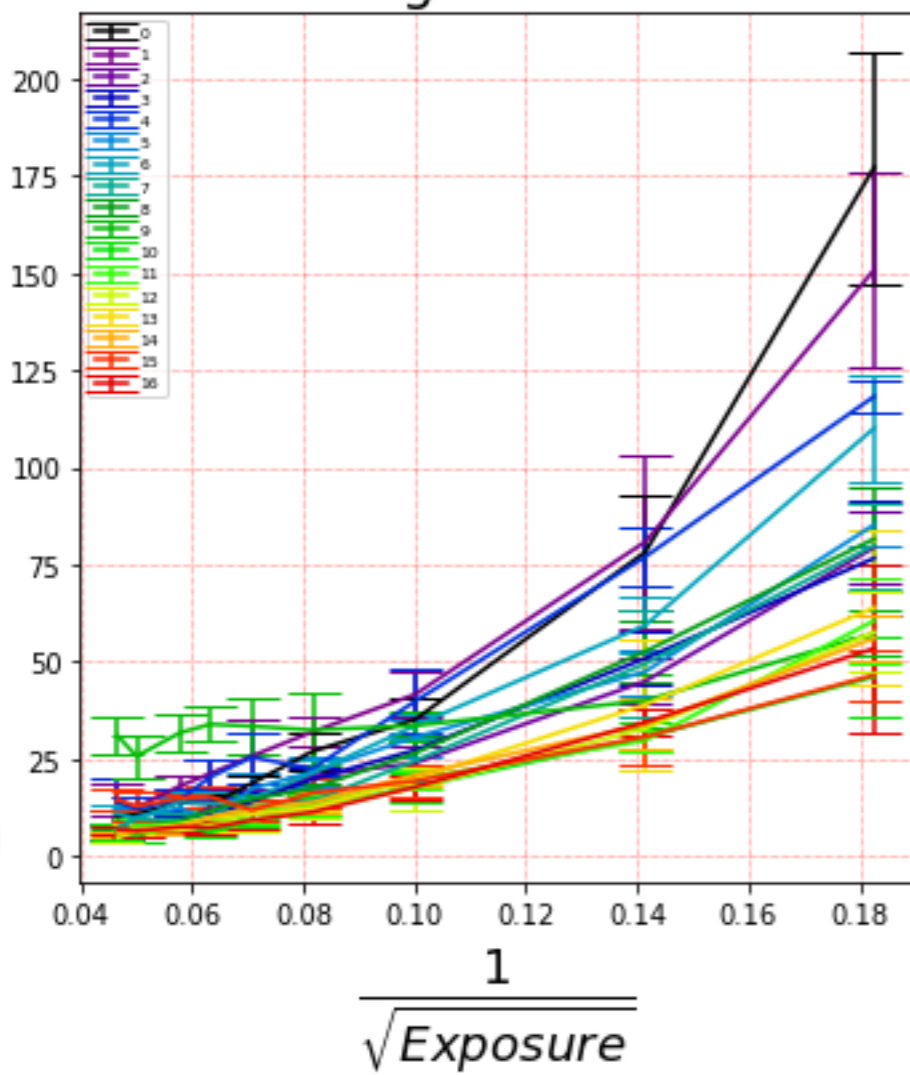

glszm\_SmallAreaHighGrayLevelEmphasis\_shift

Shifted data

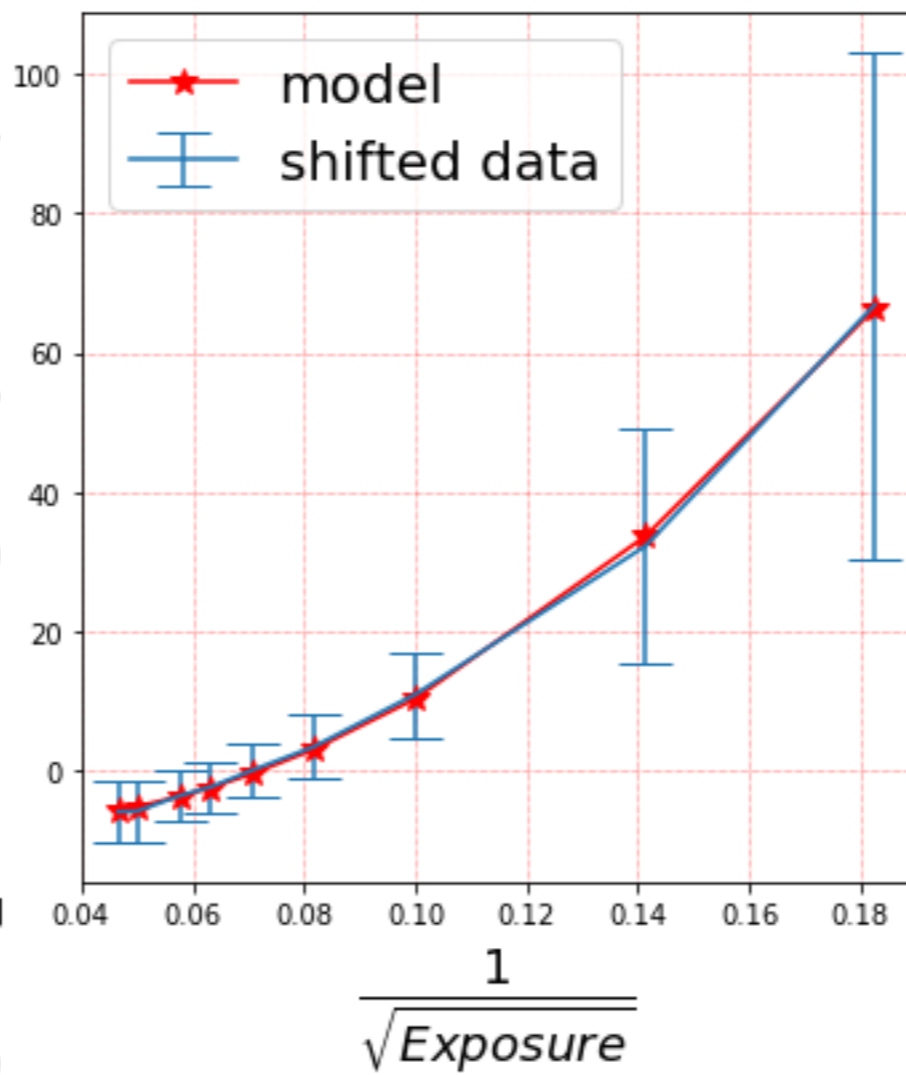

glszm\_SmallAreaHighGrayLevelEmphasis

Corrected data

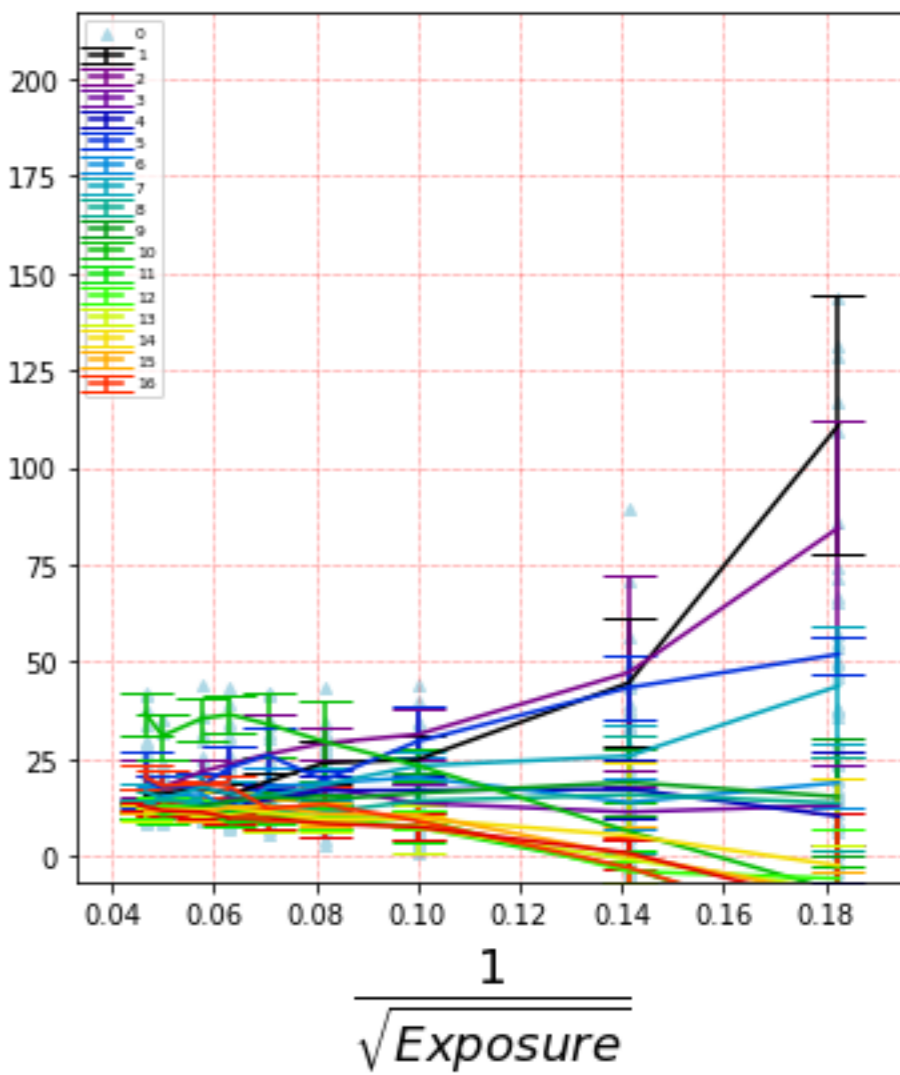



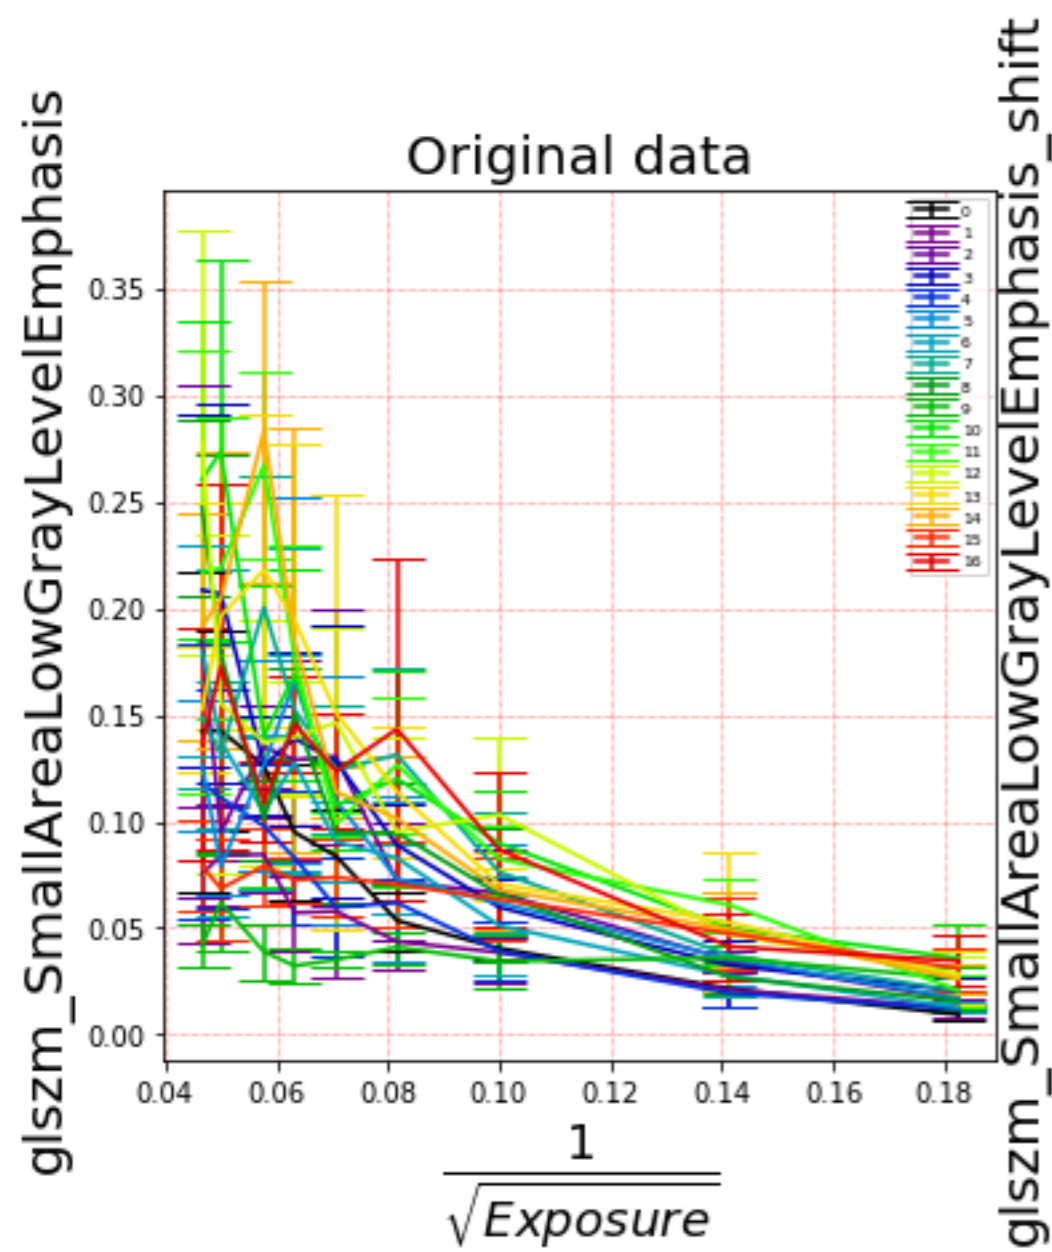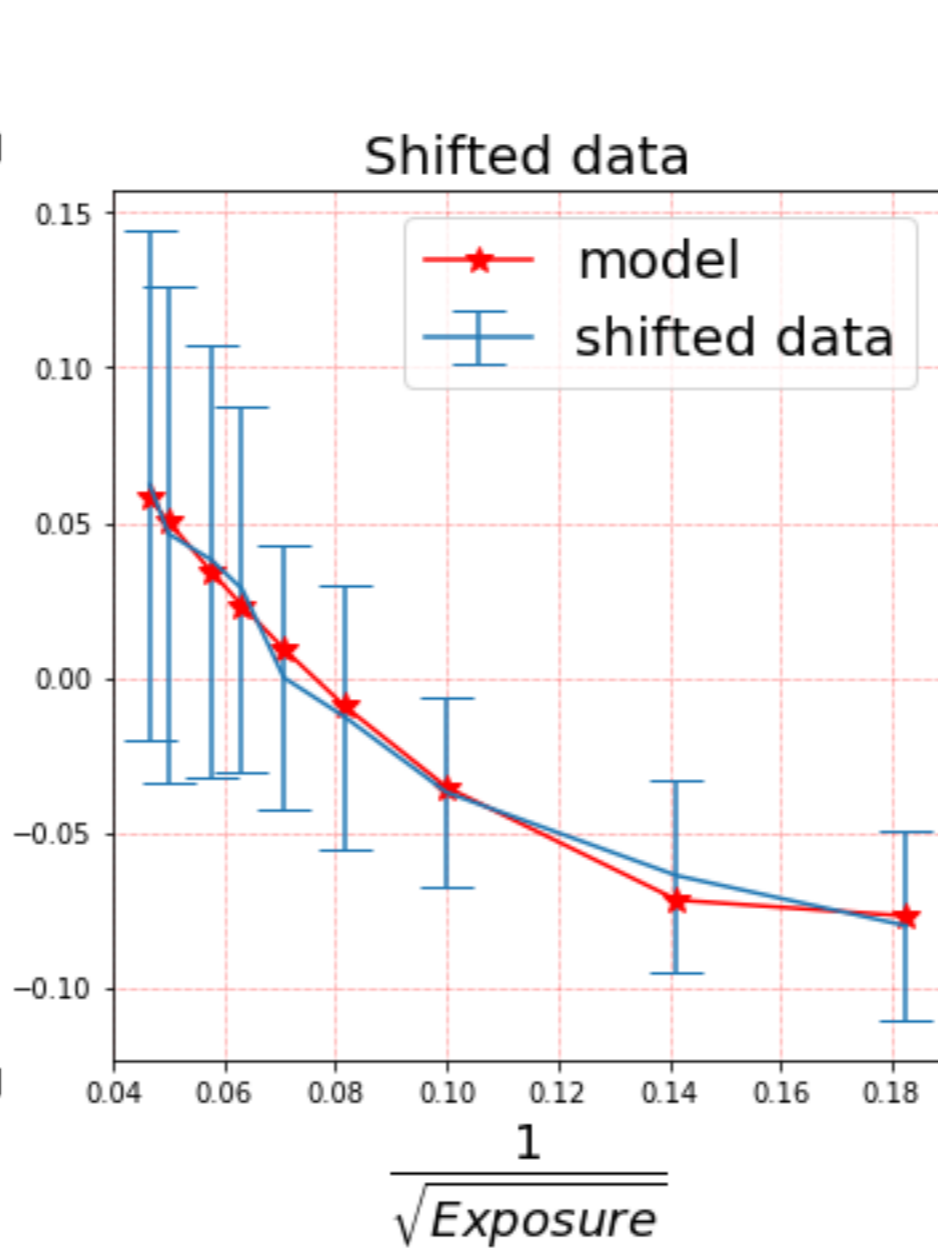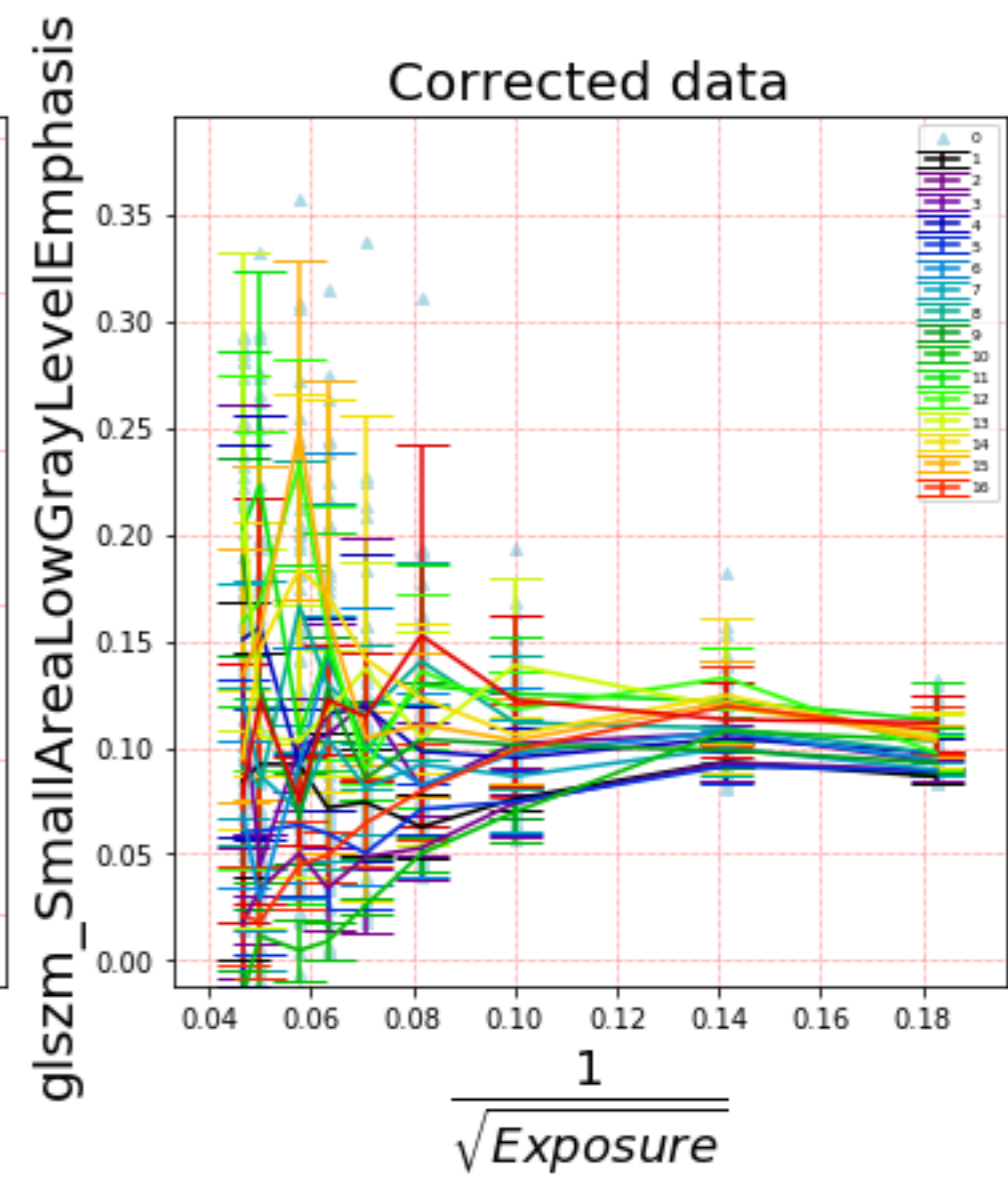

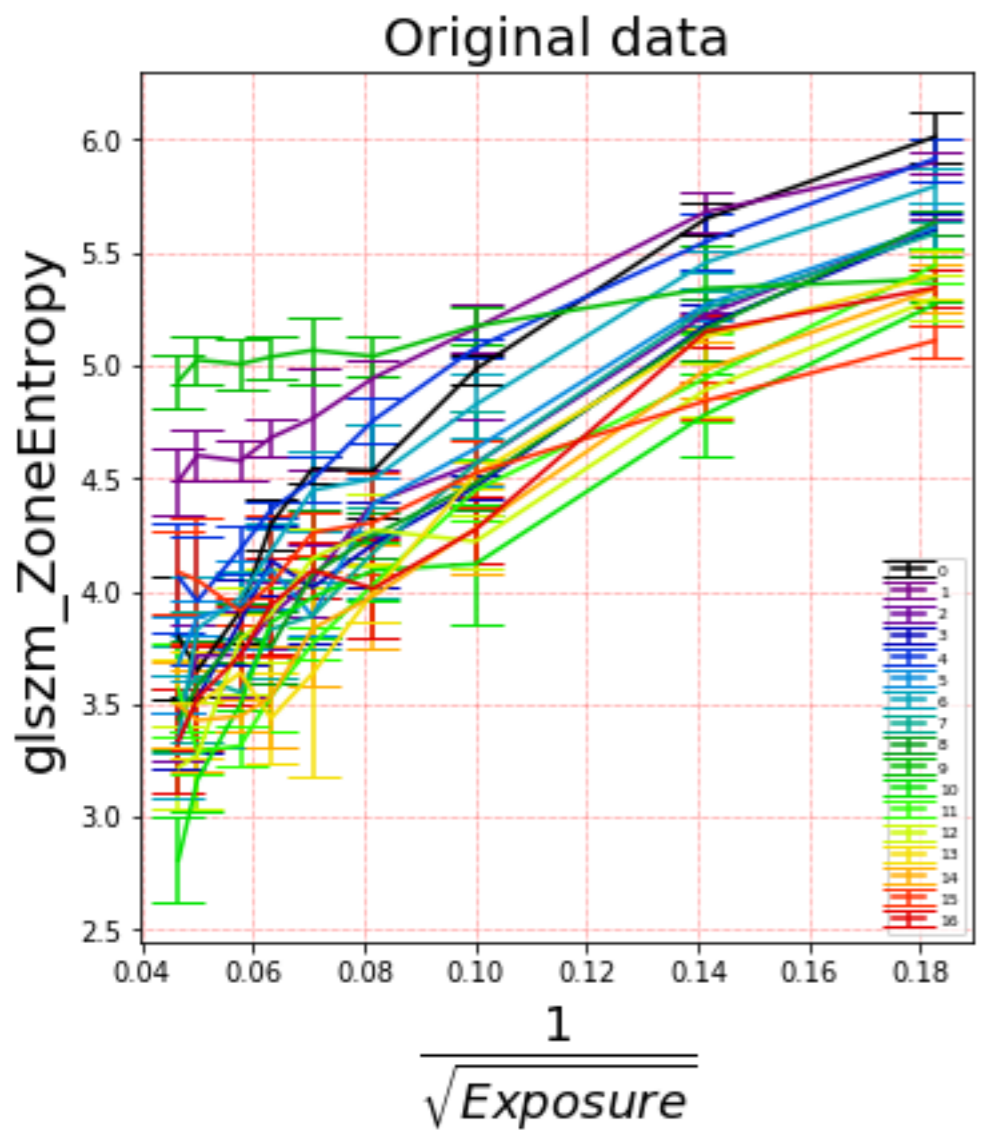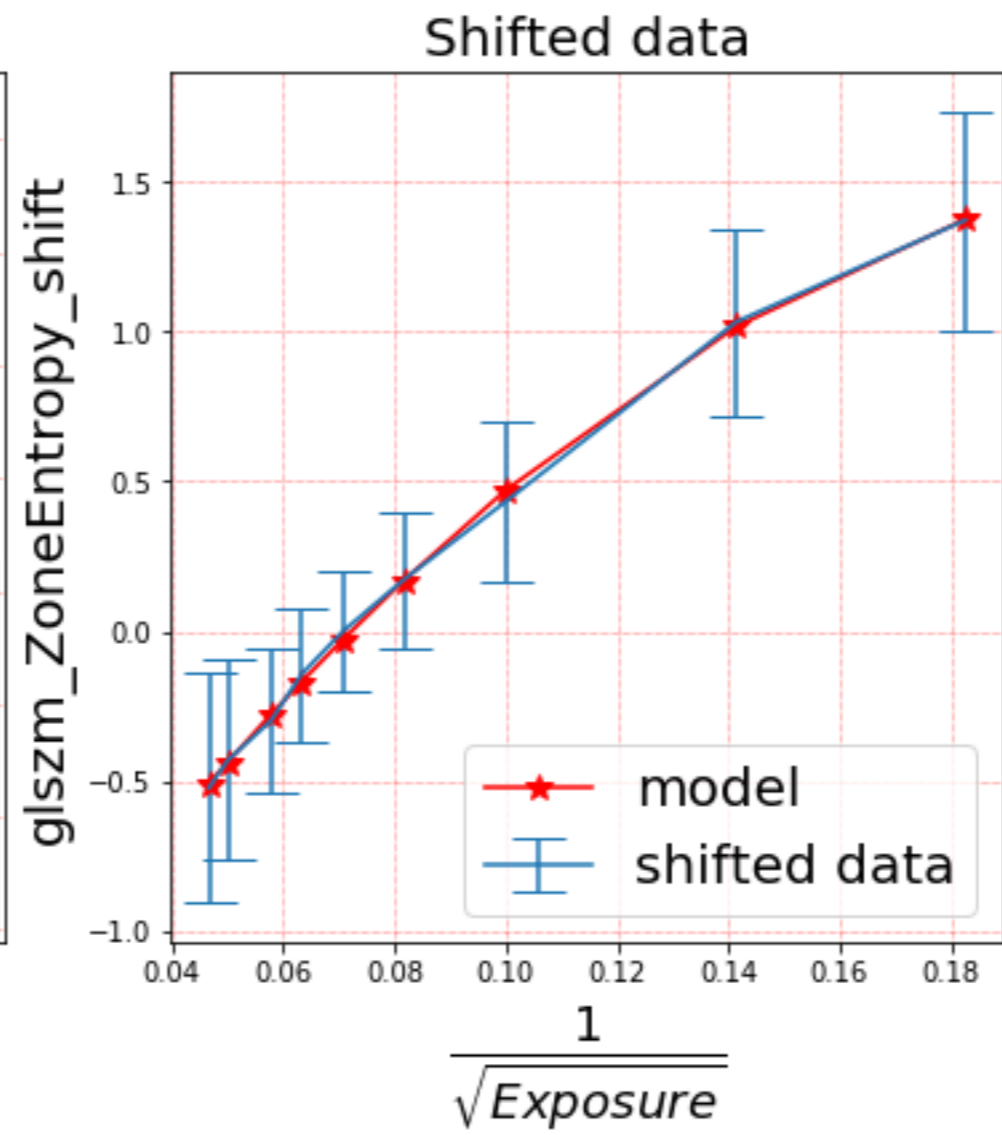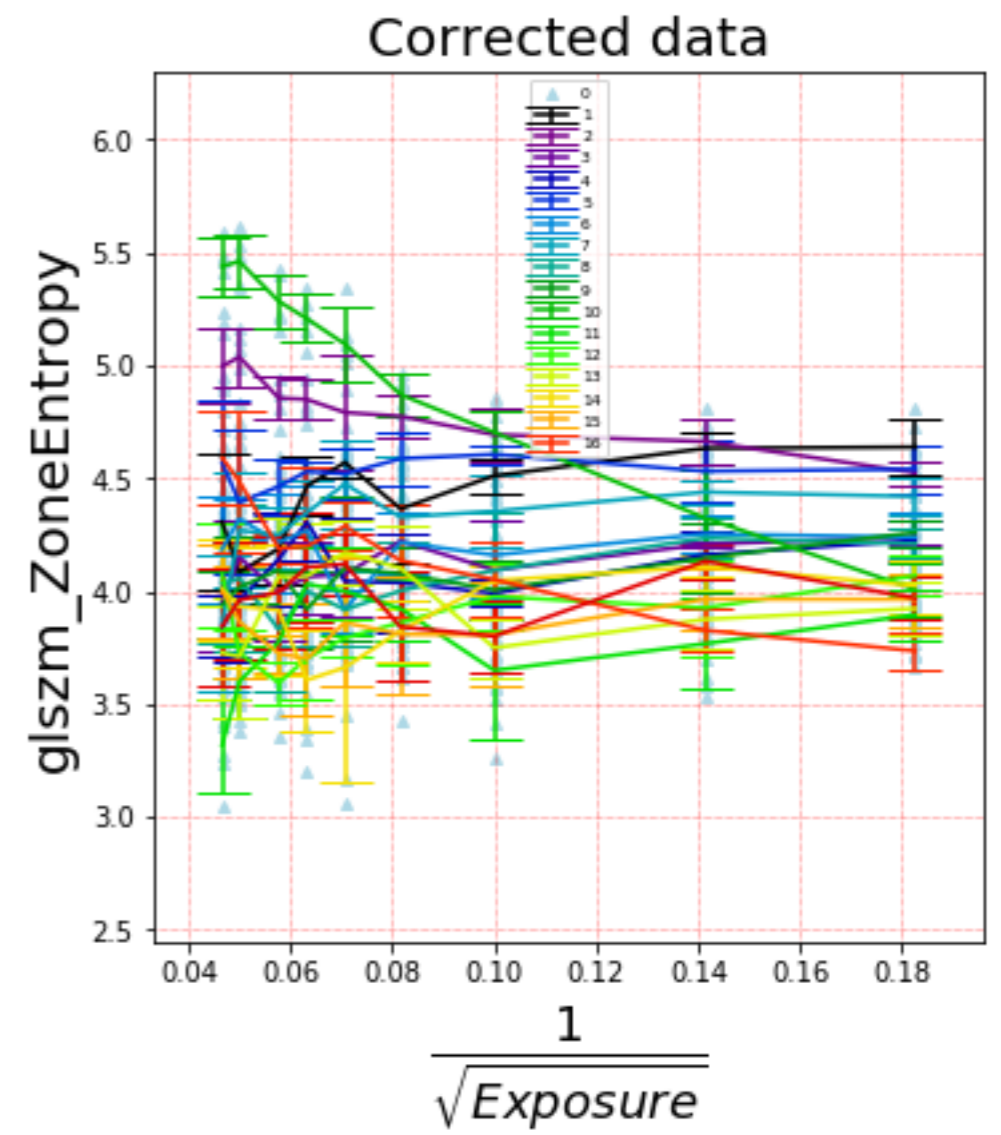

Original data

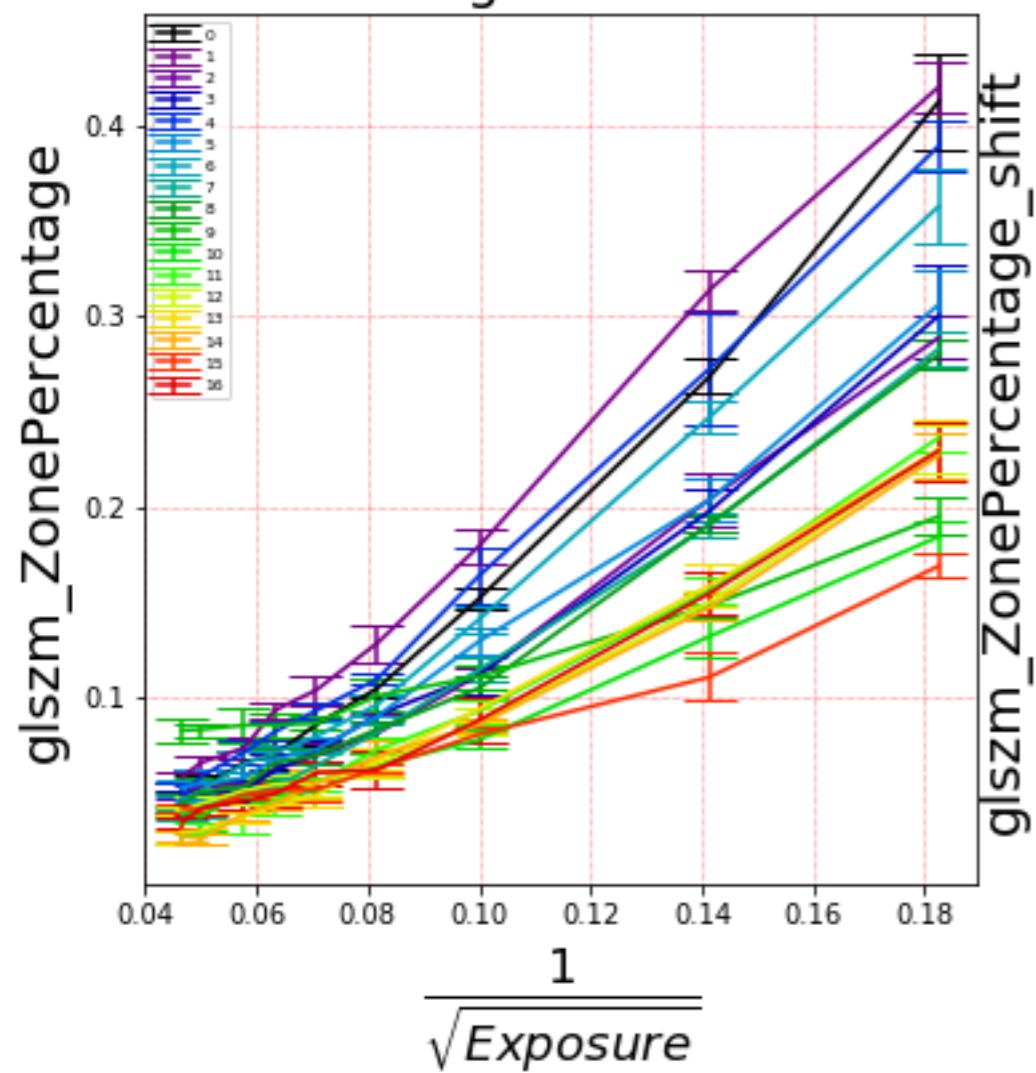

Shifted data

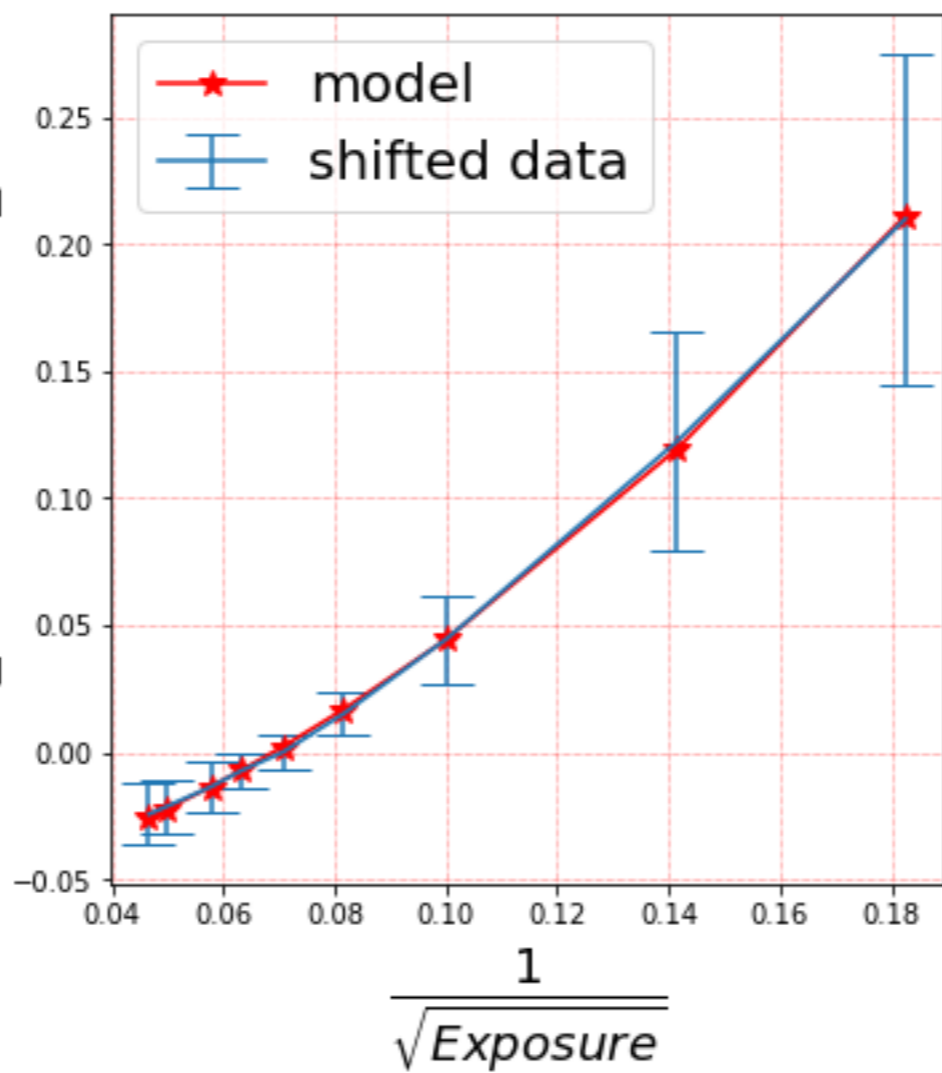

Corrected data

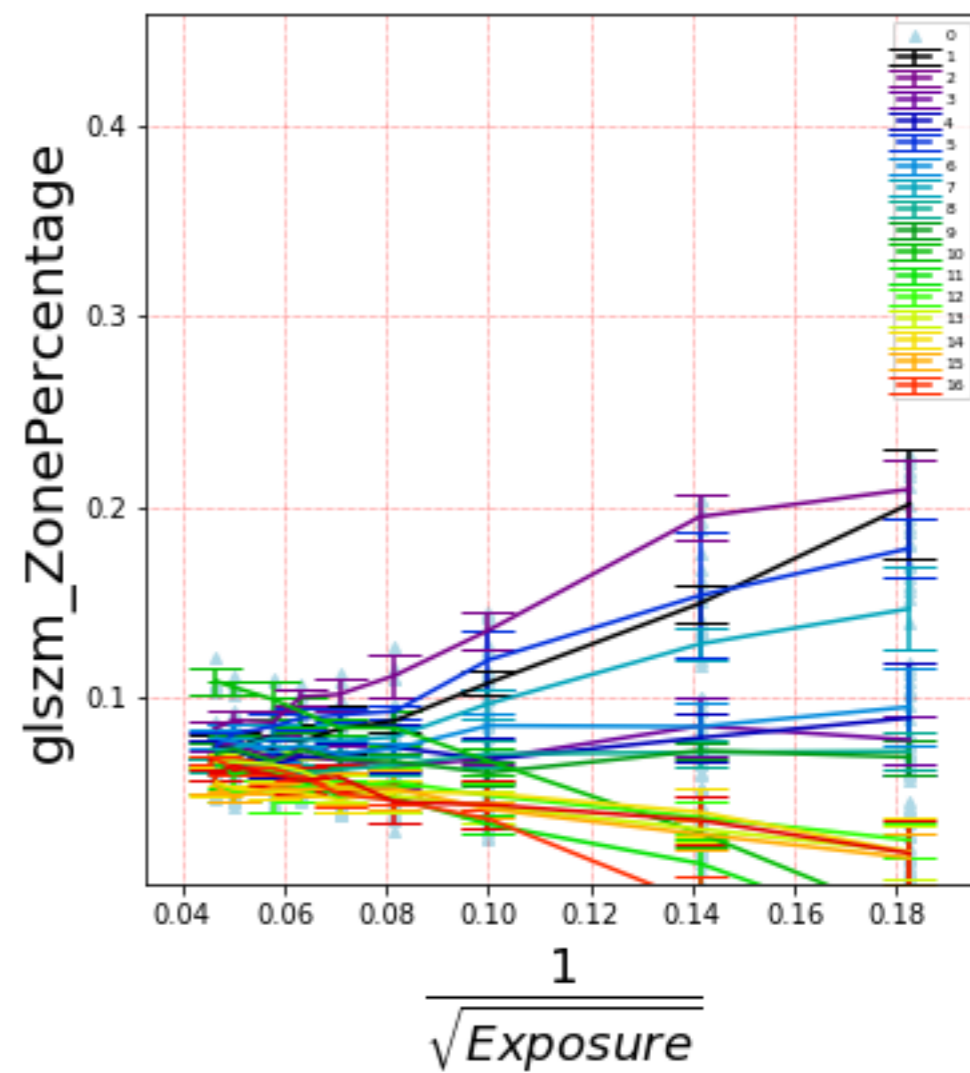

Original data

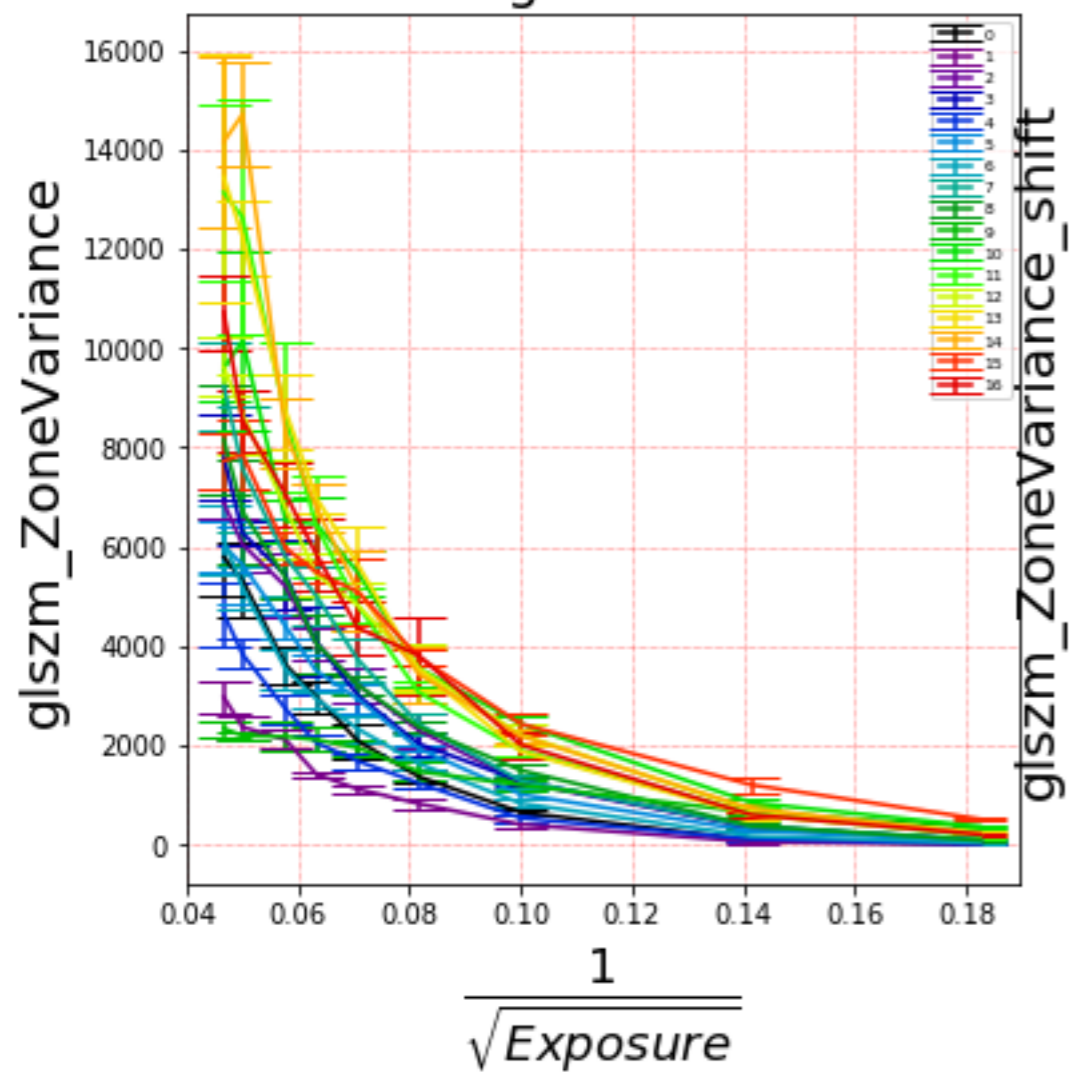

Shifted data

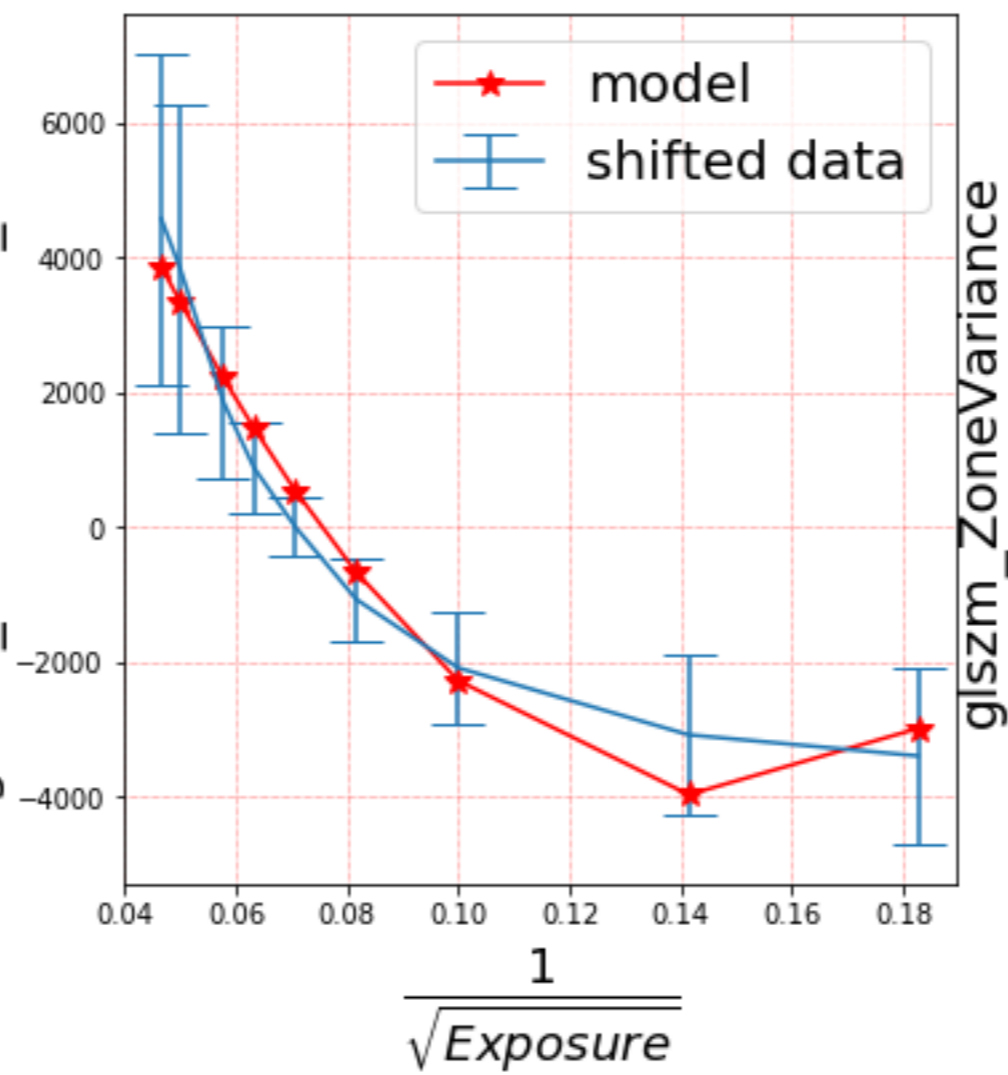

Corrected data

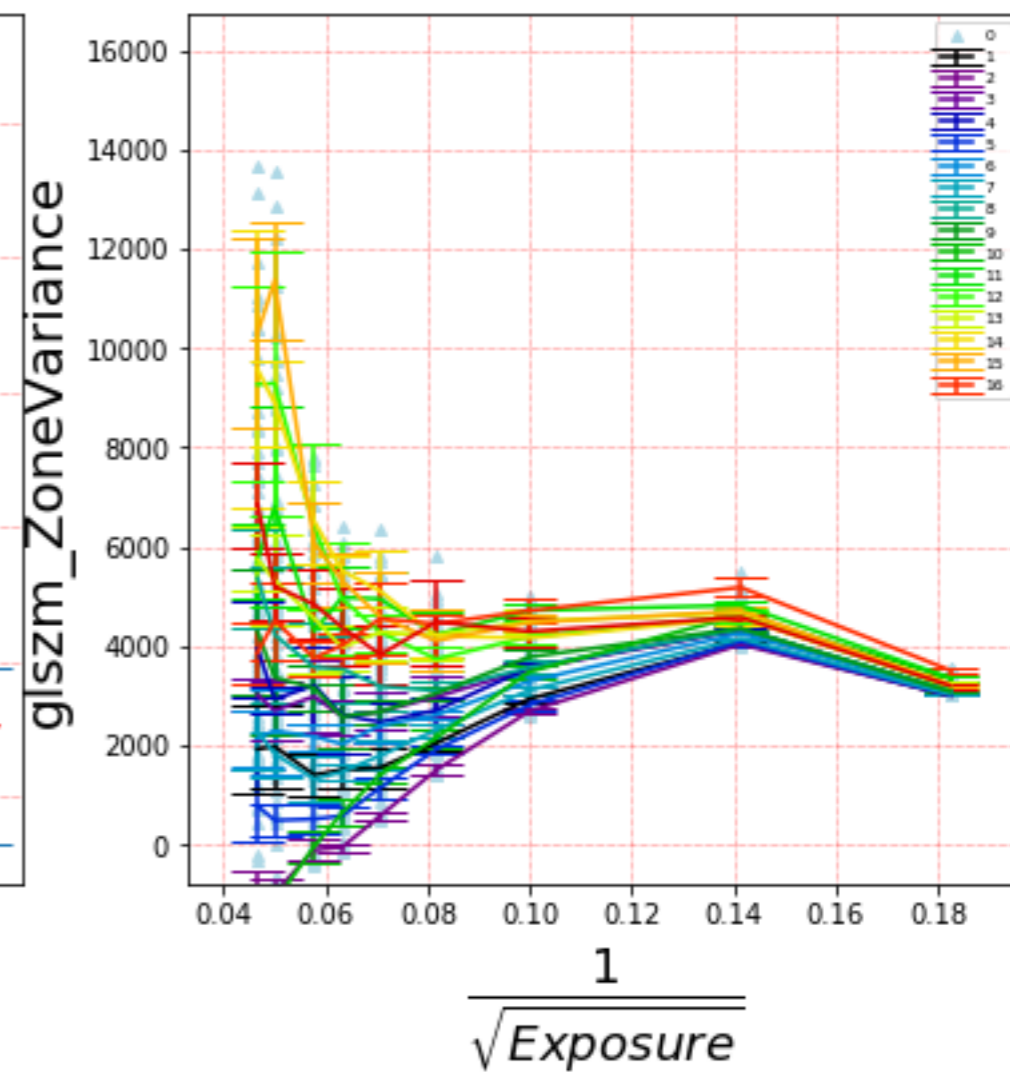



Original data

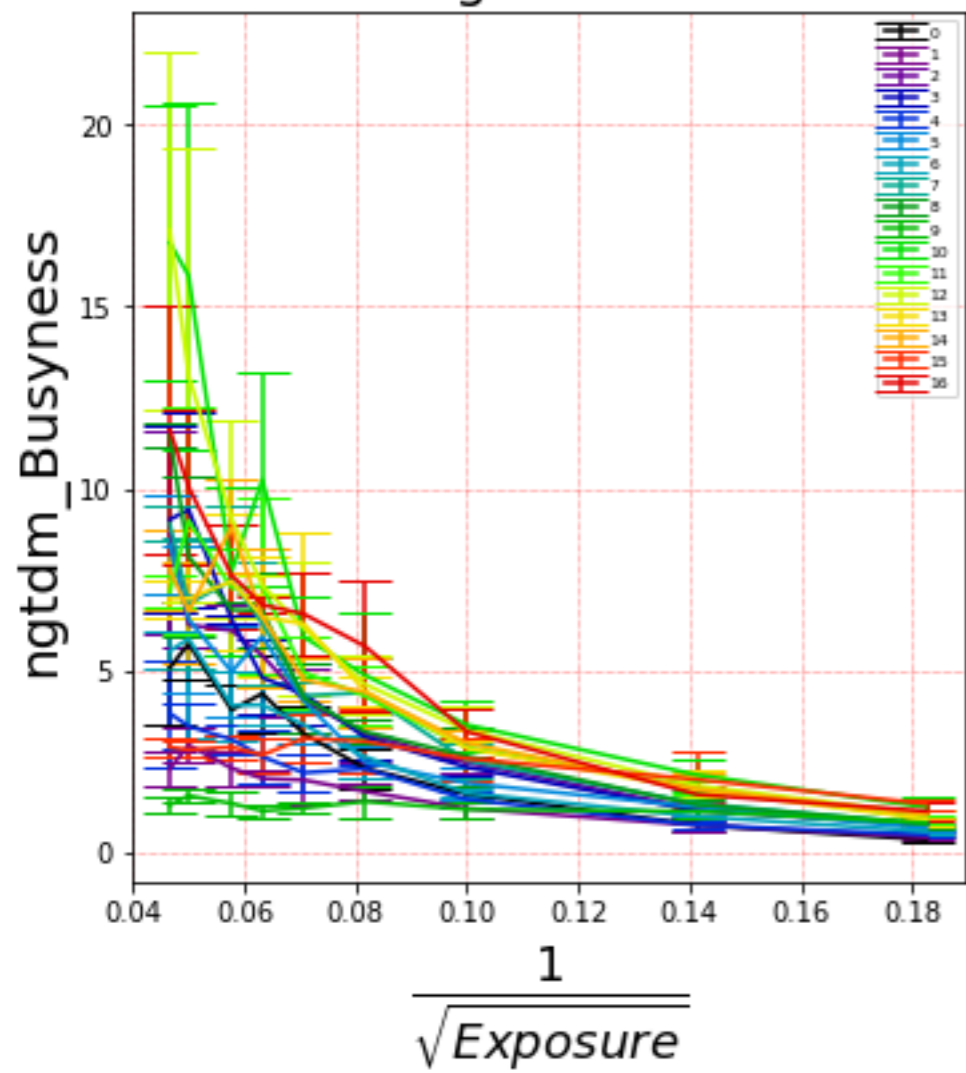

Shifted data

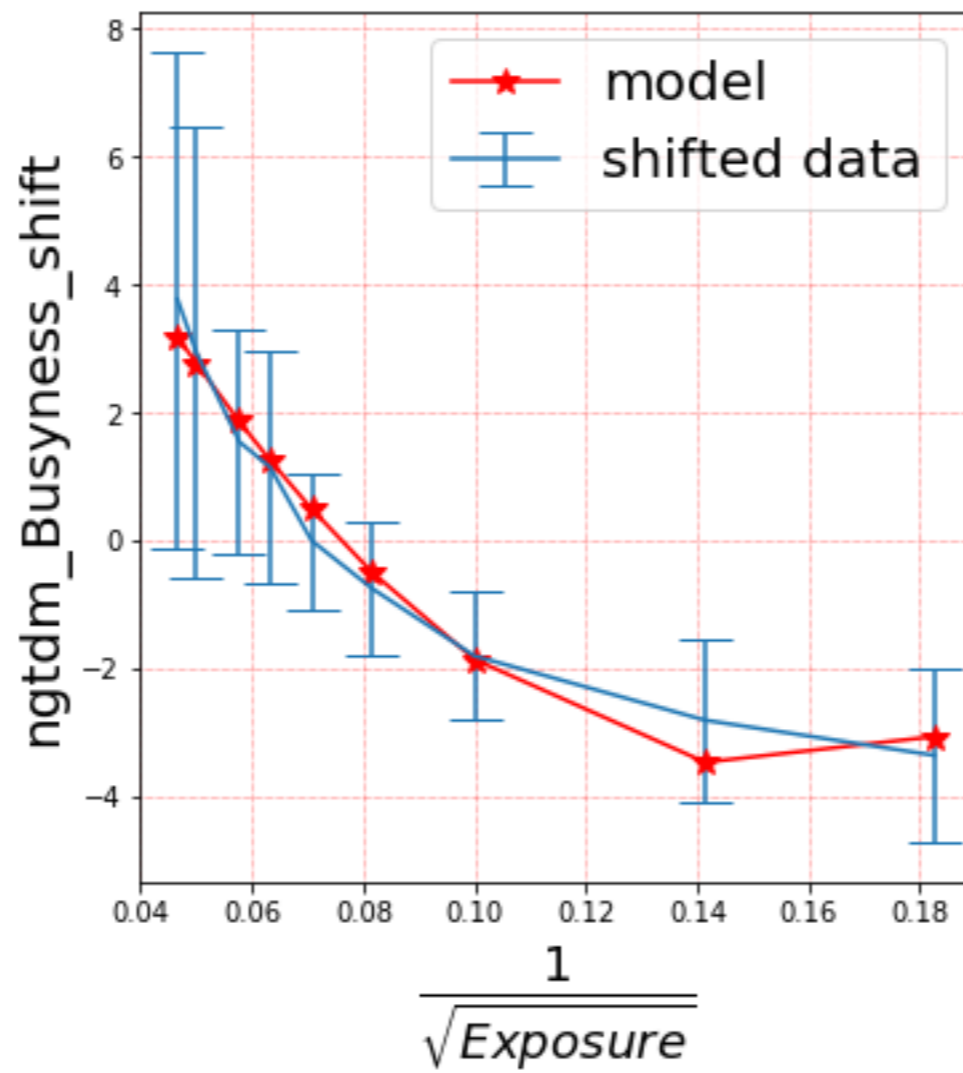

Corrected data

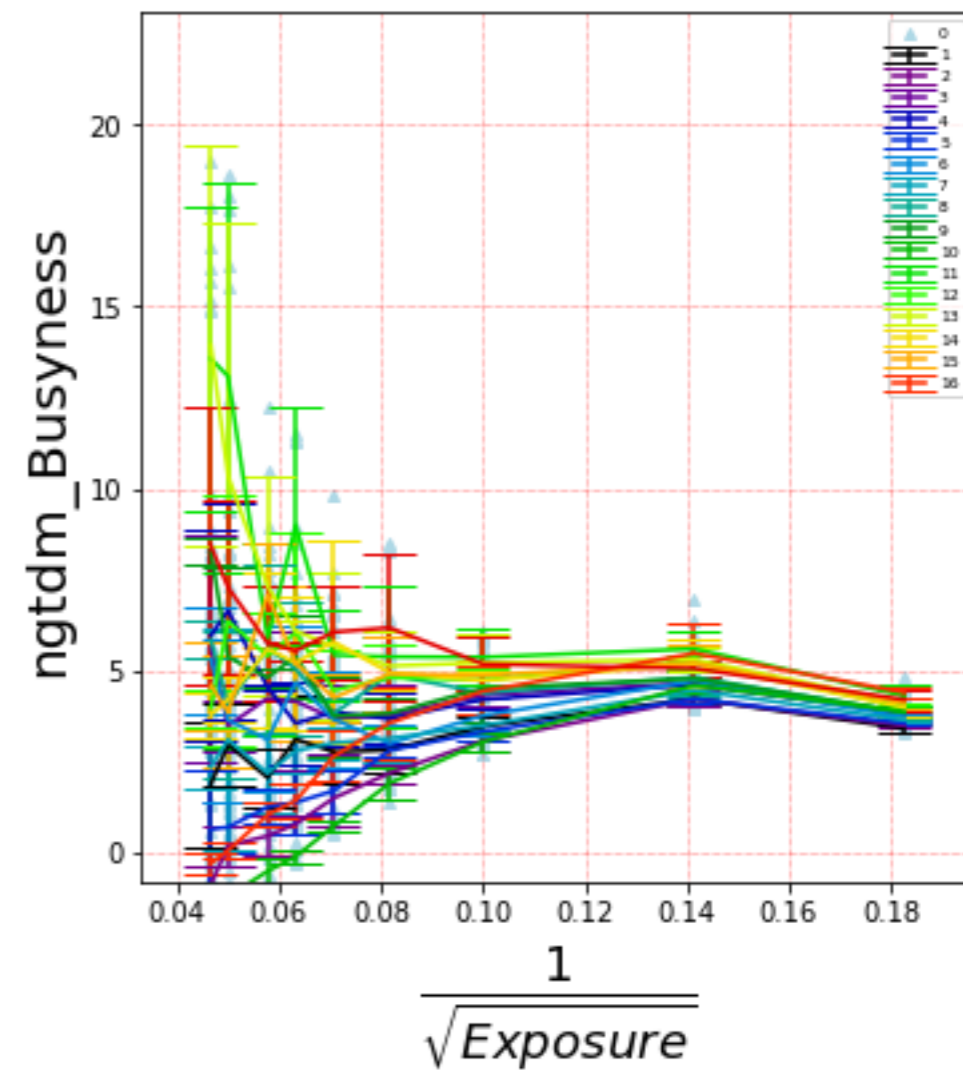

Original data

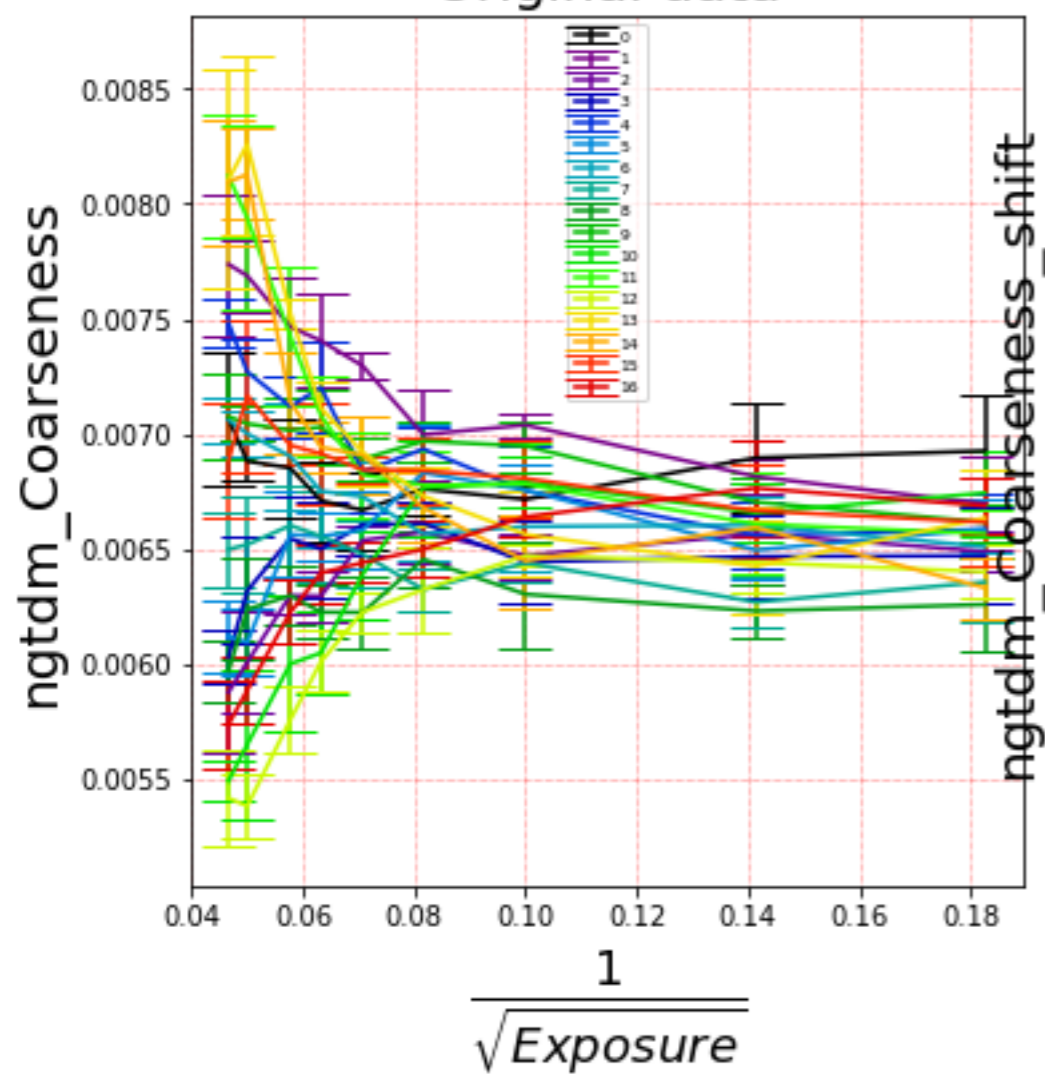

Shifted data

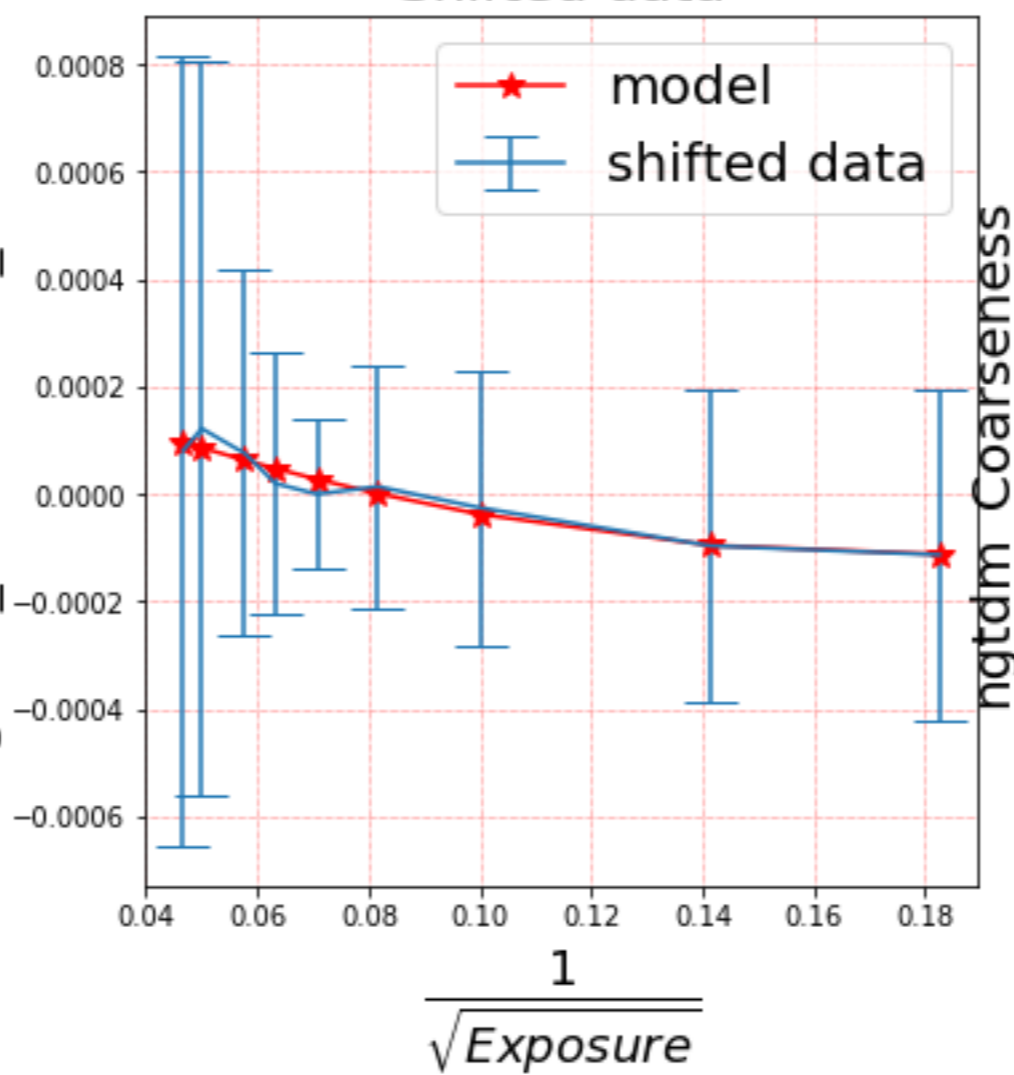

Corrected data

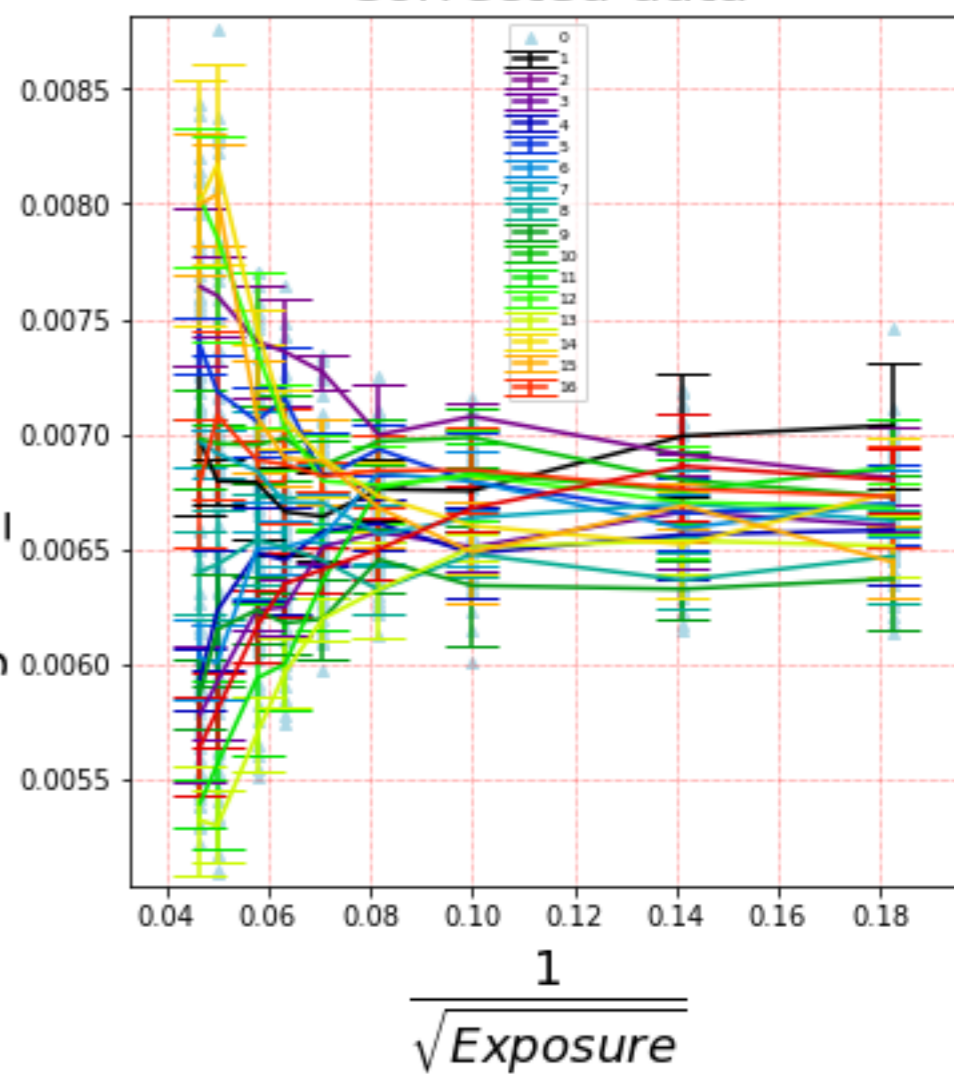

Original data

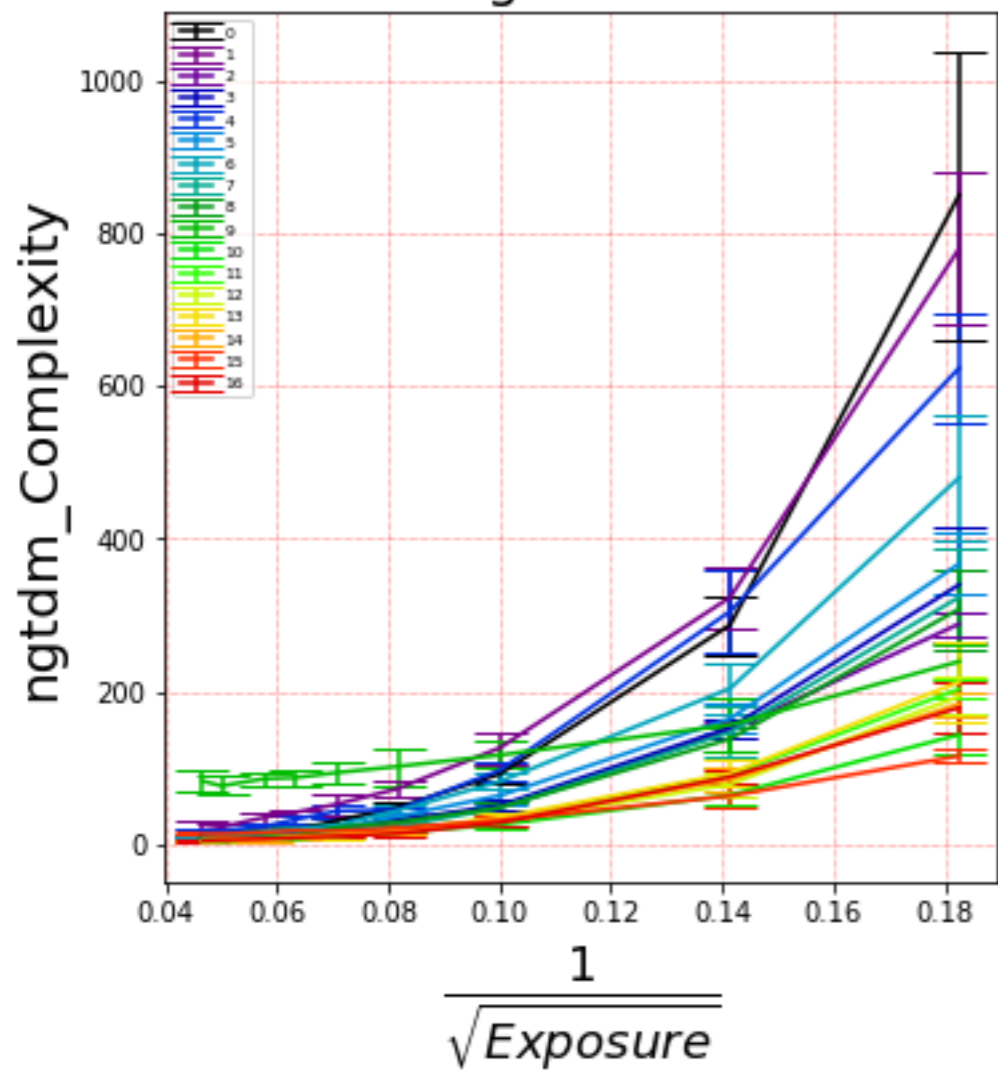

Shifted data

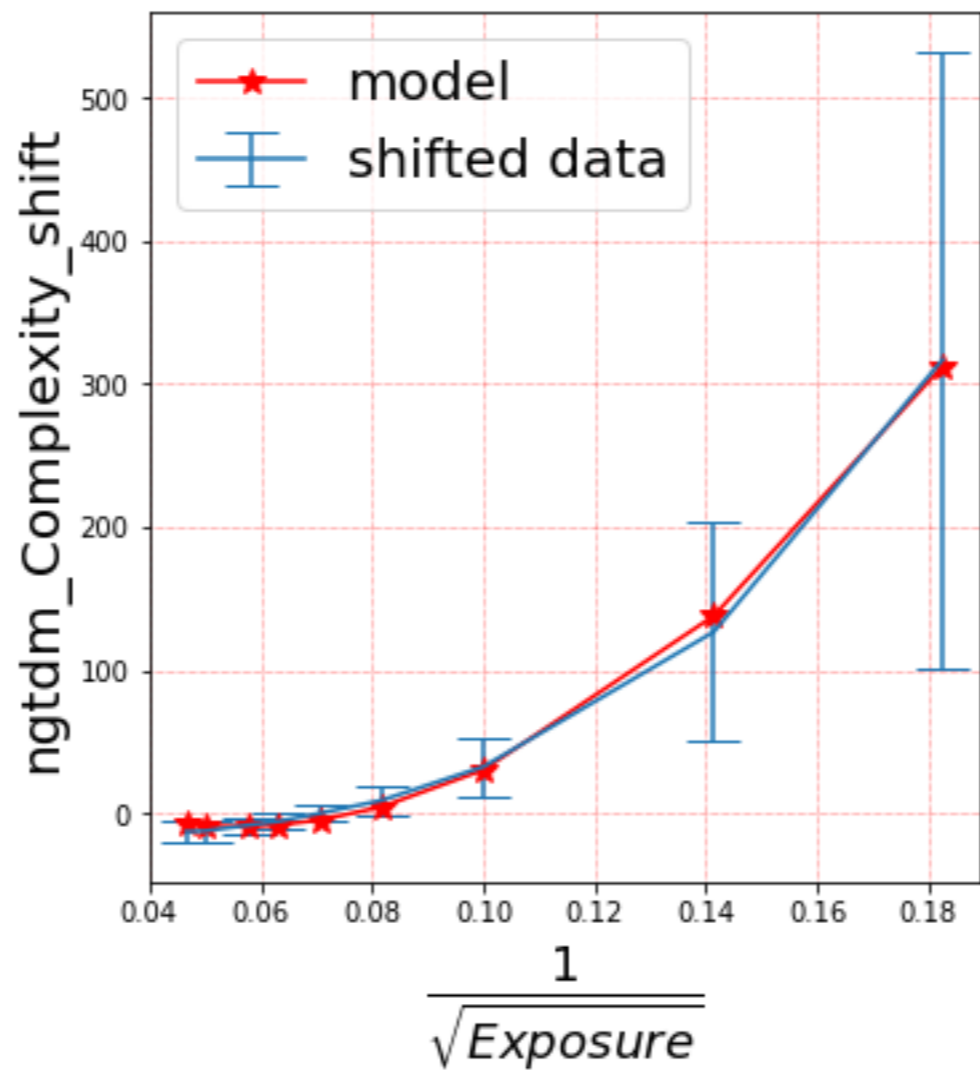

Corrected data

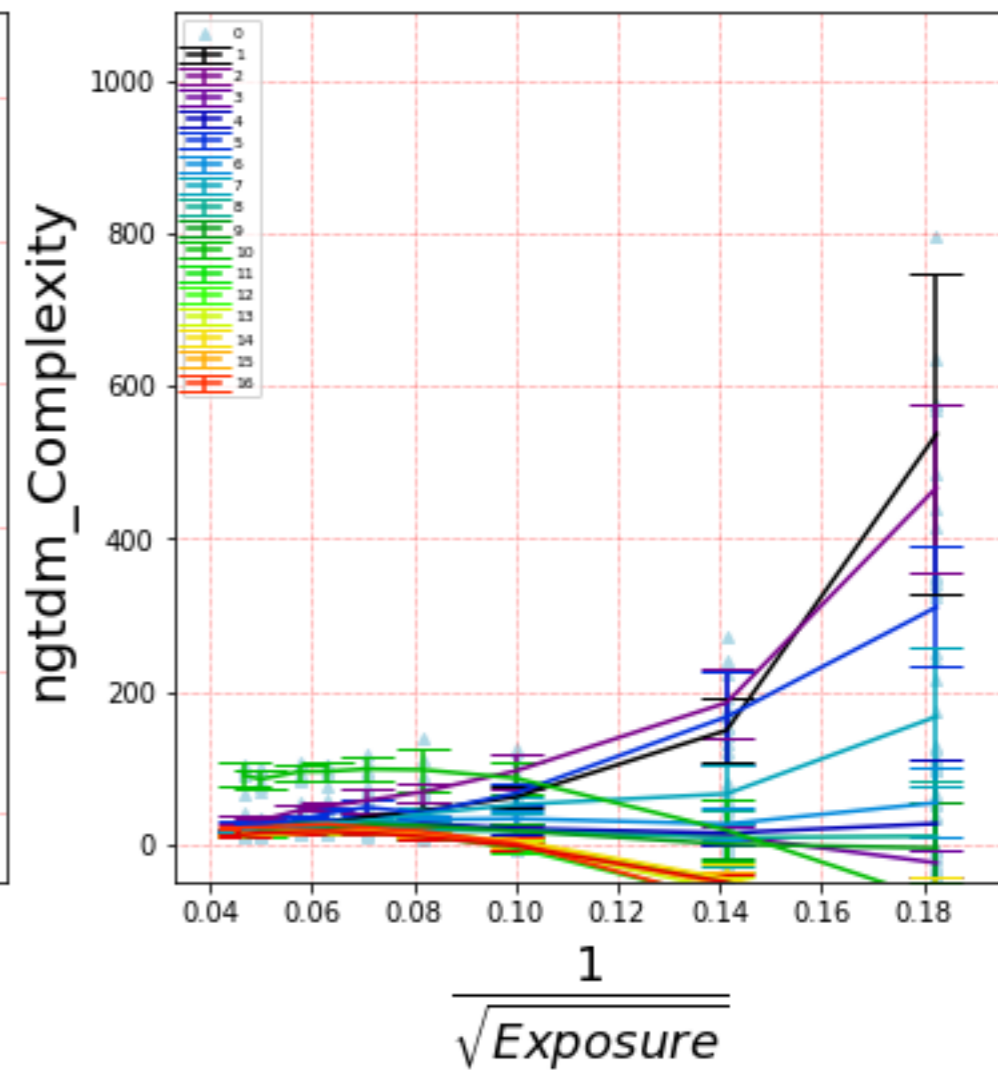

Original data

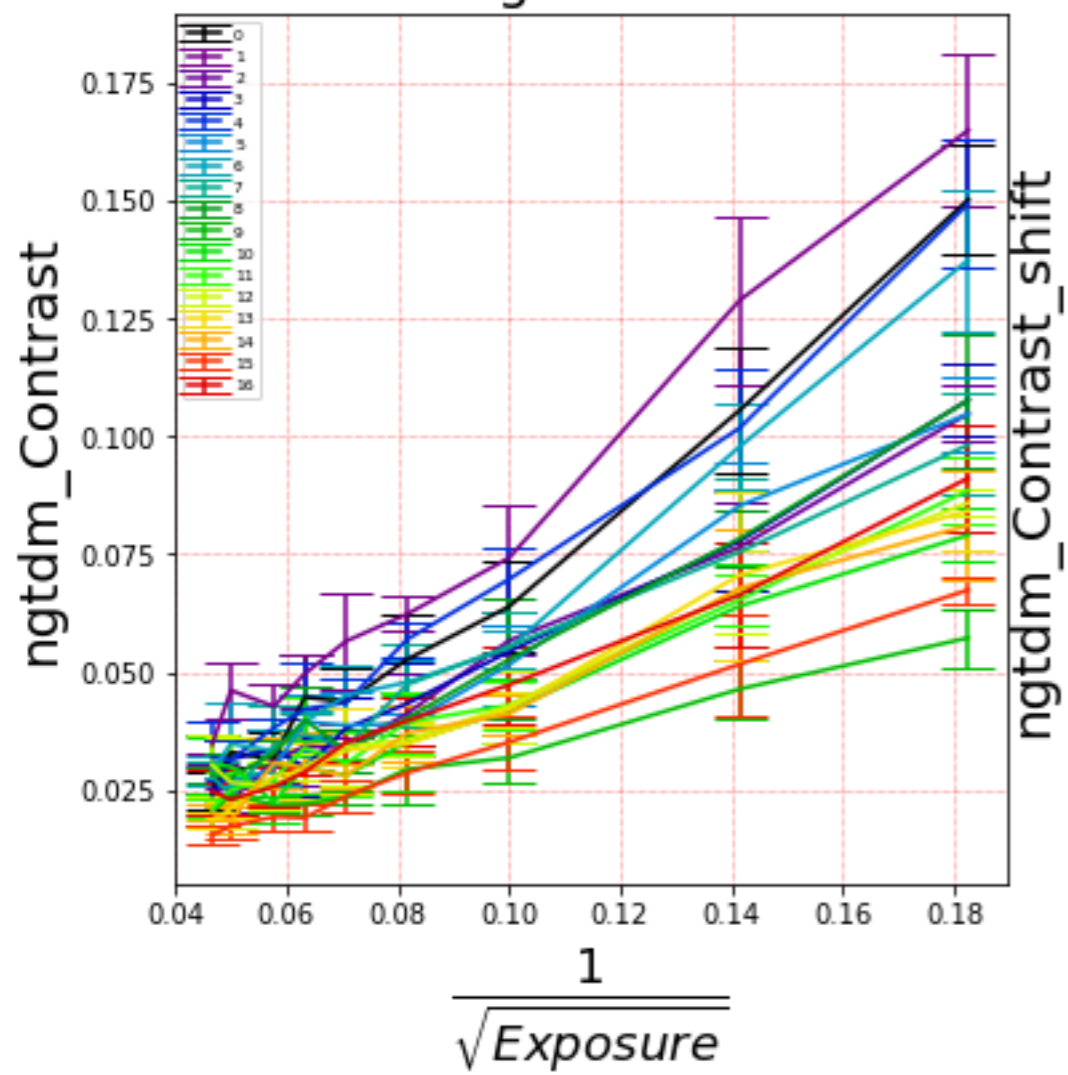

Shifted data

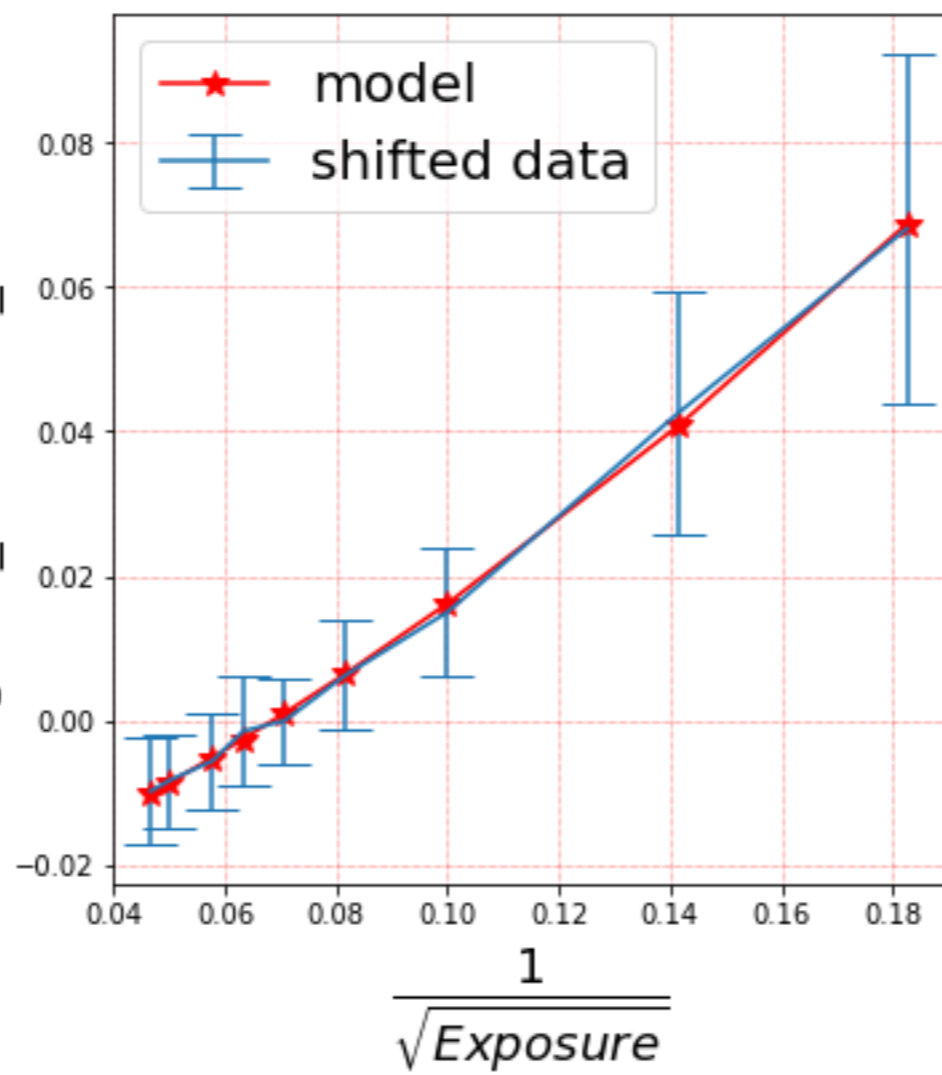

Corrected data

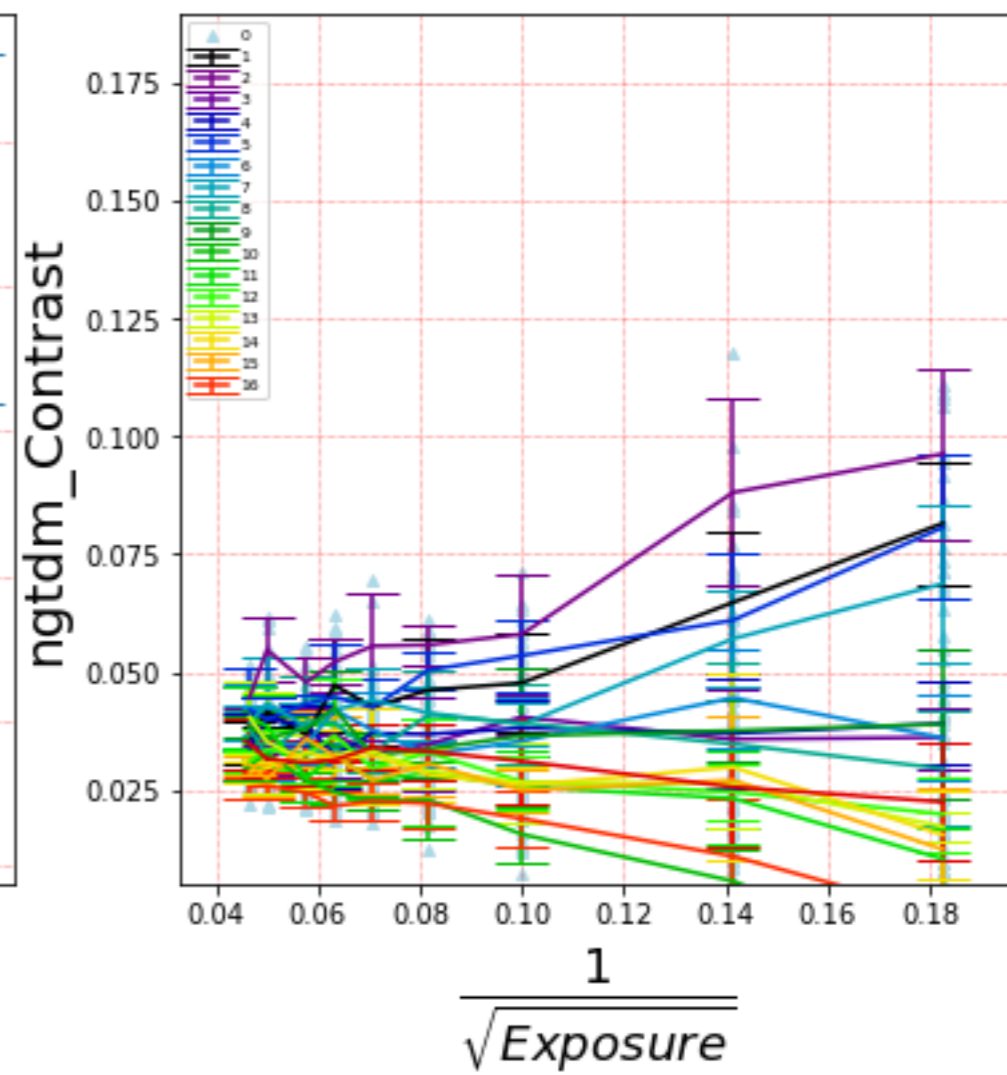



Original data

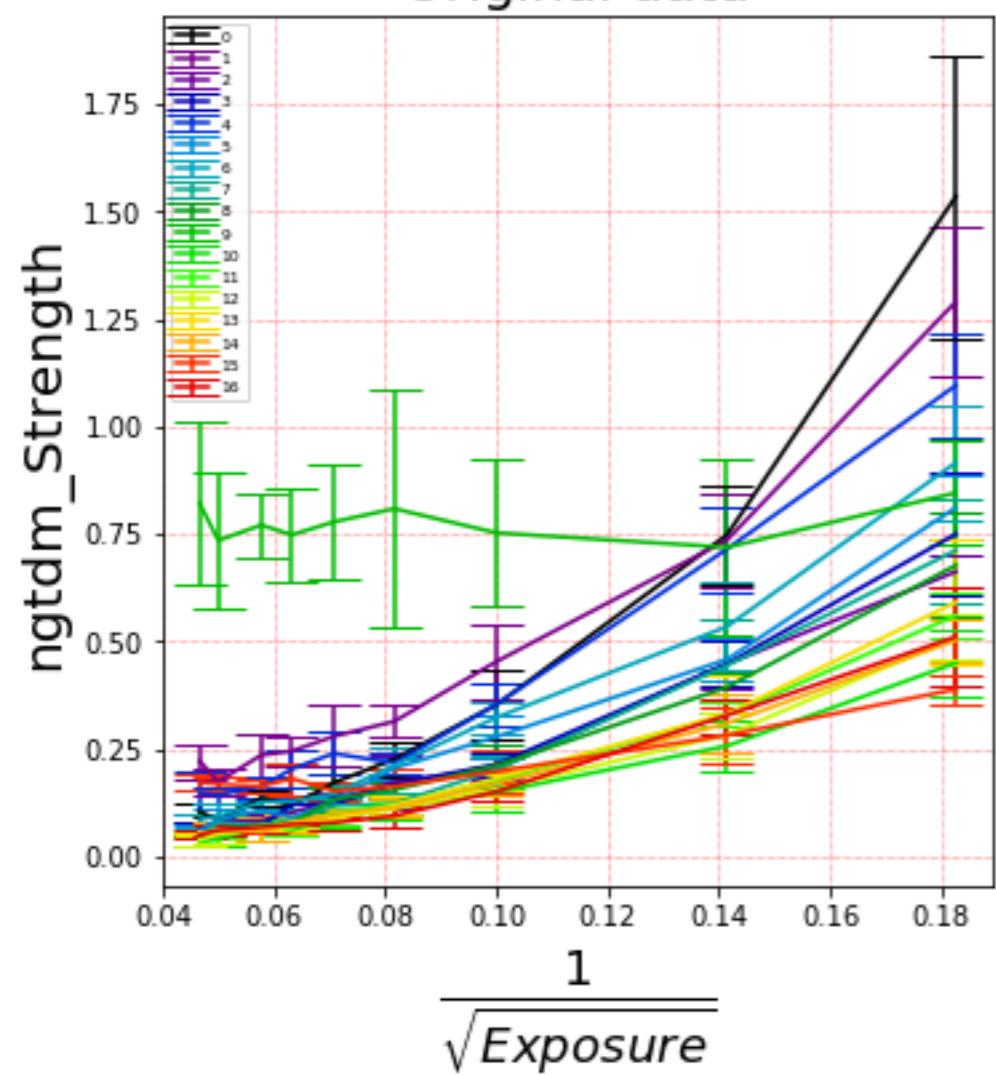

Shifted data

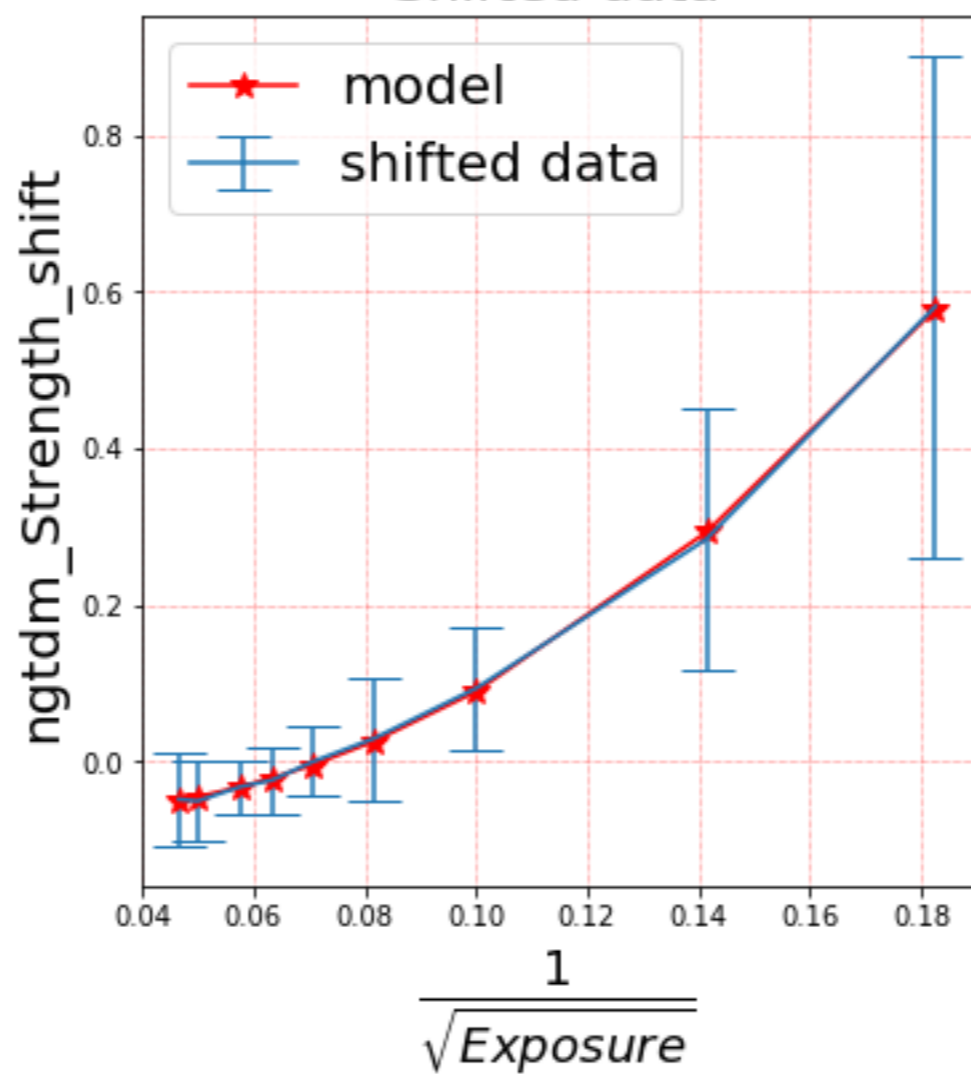

Corrected data

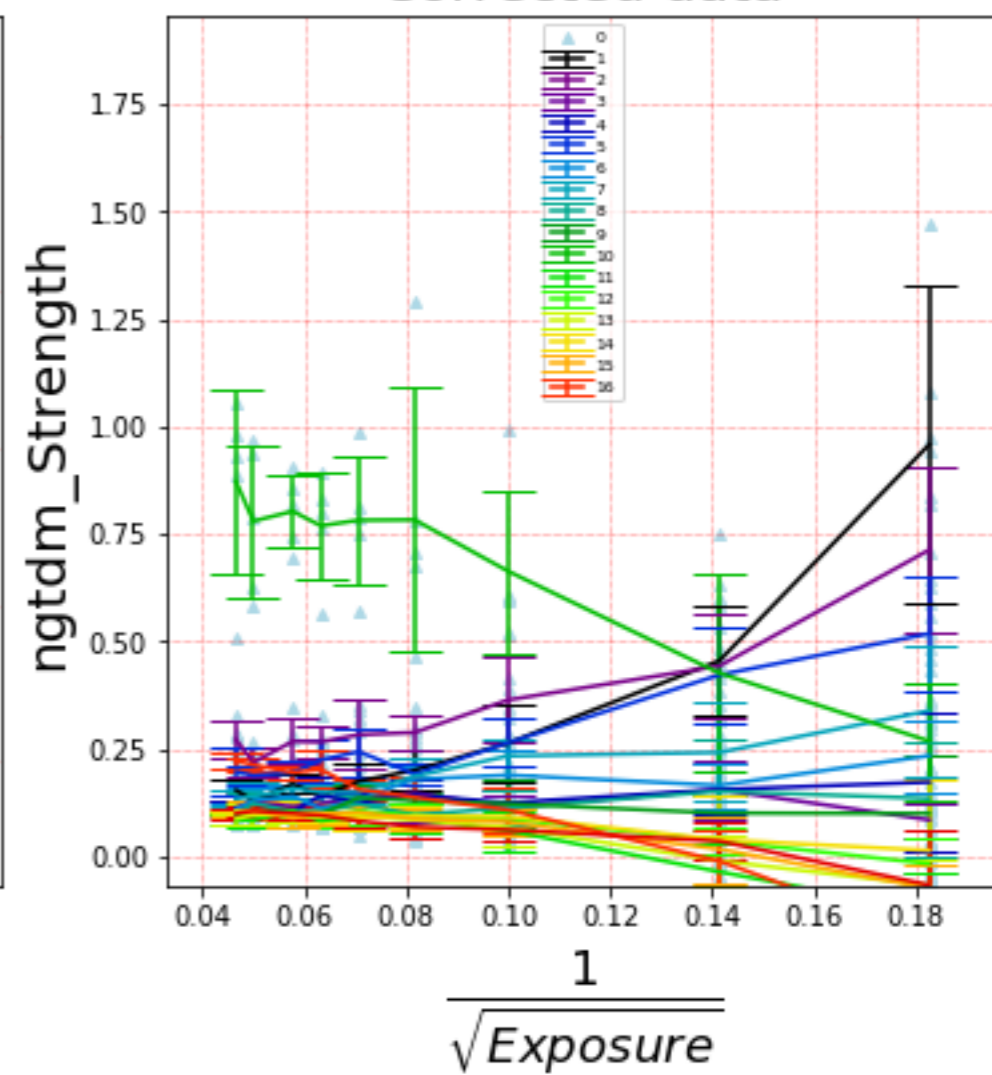

Supplement: mmc1.pdf [file mmc1.pdf]
